# Supplementary material for: Cobalt-catalysed asymmetric hydrovinylation of 1,3-dienes
Source: Royal Society of Chemistry journal article supplement (doi:10.1039/c5sc00929d), 2015-01-01
Supplement: c5sc00929d1.pdf [file c5sc00929d1.pdf]

## Cobalt-Catalyzed Asymmetric Hydrovinylation of 1,3-Dienes

Yam N. Timsina, Rakesh K. Sharma, + T. V. RajanBabu\*

Department of Chemistry and Biochemistry, The Ohio State University,  
100 West 18th Avenue, Columbus, Ohio 43210, USA

|                                                                                                                                                                                   |     |
|-----------------------------------------------------------------------------------------------------------------------------------------------------------------------------------|-----|
| <b>General methods</b>                                                                                                                                                            | S4  |
| <b>Synthesis of complexes</b>                                                                                                                                                     | S5  |
| Typical modified procedure for synthesis of cobalt complexes. Synthesis of [( <i>R,R</i> )-DIOP]CoCl <sub>2</sub>                                                                 |     |
| Synthesis of cobalt complexes of <i>N</i> -heterocyclic carbene ligand                                                                                                            |     |
| Synthesis of <i>tert</i> -Butyl <i>bis</i> -oxazoline complex                                                                                                                     |     |
| Synthesis of [dppe]FeCl <sub>3</sub> Complex                                                                                                                                      |     |
| Synthesis of methylaluminumoxane                                                                                                                                                  |     |
| <b>Synthesis of Substrates</b>                                                                                                                                                    | S7  |
| Synthesis of ( <i>E</i> )-6-benzyloxy-1,3-hexadiene                                                                                                                               |     |
| Synthesis of ( <i>E</i> )-ethyl-2-methyl-penta-2,4-dienoate                                                                                                                       |     |
| Synthesis of ( <i>E</i> )-ethyl-hexa-3,5-dienoate and ( <i>E</i> )- <i>t</i> -Bu-hexa-3,5-dienoate                                                                                |     |
| Synthesis of ( <i>Z/E</i> )-1-cyclohexyl-1,3-butadiene and other related dienes                                                                                                   |     |
| <b>X<sub>2</sub>Co(L)-Catalyzed Hydrovinylation of 1,3-Dienes</b>                                                                                                                 | S9  |
| Hydrovinylation of ( <i>E</i> )-nona-1,3-diene ( <b>12a</b> ) using [DPPB]CoCl <sub>2</sub> (Table 1, Entry 9, Typical procedure for ligand screening).                           | S9  |
| Identification of products of hydrovinylation of ( <i>E</i> )-nona-1,3-diene ( <b>12a</b> )                                                                                       | S10 |
| Procedure for Co-catalyzed hydrovinylation of ( <i>E</i> )-nona-1,3-diene ( <b>12a</b> ) using [dppb]CoBr <sub>2</sub> (Table 1, Ligand Screening, Entry 10).                     | S11 |
| Hydrovinylation of ( <i>E</i> )-nona-1,3-diene ( <b>12a</b> ) using [dppp]CoCl <sub>2</sub> at room temperature (Ligand screening, Table 1, Entry 7).                             | S11 |
| Hydrovinylation of ( <i>E</i> )-nona-1,3-diene ( <b>12a</b> ) using [dppm]CoCl <sub>2</sub> at room temperature (Ligand screening, Table 1, Entry 12).                            | S11 |
| Hydrovinylation of ( <i>E</i> )-nona-1,3-diene ( <b>12a</b> ) using [BISBI]CoCl <sub>2</sub> (Ligand Screening, Table 1, Entry 14).                                               | S12 |
| <b>Screening of activators in the Co-Catalyzed hydrovinylation of 1,3-dienes (Table 2)</b>                                                                                        | S12 |
| Unsuccessful hydrovinylation of nona-1,3-diene using [dppe]CoCl <sub>2</sub> and Mn as promoter (Promoters screening, Table 2, Entry 9).                                          | S12 |
| Hydrovinylation of ( <i>E</i> )-dodeca-1,3-diene using [DPPP]COBr <sub>2</sub> and Zn/ZnI <sub>2</sub> . (Promoters screening, Table 2, Entry 20)                                 | S13 |
| Unsuccessful hydrovinylation of ( <i>E</i> )-dodeca-1,3-diene using DPPBCoCl <sub>2</sub> and diethyl aluminum chloride (Et <sub>2</sub> AlCl) as a promoter (Table 2, Entry 13). | S13 |
| Unsuccessful hydrovinylation of nona-1,3-diene using [DPPM]CoCl <sub>2</sub> and MeMgBr and AgOTf as promoters (Promoters screening, Table 2, Entry 12)                           | S13 |
| Iron-catalyzed hydrovinylation of ( <i>E</i> )-nona-1,3-diene using [DPPE]FeCl <sub>3</sub> (Equation 11):                                                                        | S14 |

|                                                                                                                                                                                        |     |
|----------------------------------------------------------------------------------------------------------------------------------------------------------------------------------------|-----|
| Unsuccessful hydrovinylation of substrate ( <i>E</i> )-ethyl-2-methylpenta-2,4-dienoate using [dppm]CoCl <sub>2</sub>                                                                  | S14 |
| Unsuccessful attempt to dimerize ( <i>E</i> )-1,3-nonadiene and propylene using [dppe]CoCl <sub>2</sub> (Equation 10)                                                                  | S14 |
| <b>Cobalt-Catalyzed Hydrovinylation of 1,3-Dienes. Scope of Substrates (Tables 3 and 5)</b>                                                                                            | S16 |
| <b>(<i>E</i>)-nona-1,3-diene (12a)</b>                                                                                                                                                 | S16 |
| Typical procedure for asymmetric Co-catalyzed hydrovinylation reactions of ( <i>E</i> )-nona-1,3-diene ( <b>12a</b> ) for ligand screening (Table 4, Entries 1-20).                    |     |
| Asymmetric Co-catalyzed hydrovinylation reactions( <i>E</i> )-1,3-nonadiene ( <b>12a</b> ) by using ( <i>S,S,R,R</i> )-Tangphos [( <b>L14</b> )CoCl <sub>2</sub> ] (Table 5, Entry 3). |     |
| Asymmetric Co-catalyzed hydrovinylation reaction ( <i>E</i> )-1,3-nonadiene by using 1 mol % Josiphos 2 [( <b>L18</b> )CoCl <sub>2</sub> ] (Table 5, Entry 4).                         |     |
| <b>(<i>E</i>)-Deca-1,3-diene (12b)</b>                                                                                                                                                 | S26 |
| Hydrovinylation of ( <i>E</i> )-deca-1,3-diene using ( <i>R,R</i> )[DIOP]CoCl <sub>2</sub> (Table 5, Entry 5).                                                                         |     |
| <b>(<i>E</i>)-Undeca-1,3-diene (12c)</b>                                                                                                                                               | S31 |
| Hydrovinylation of ( <i>E</i> )-undeca-1,3-diene using 1 mol % [ <b>L18</b> Josiphos-2]CoCl <sub>2</sub> Loading (Table 5, Entry 7).                                                   |     |
| <b>(<i>E</i>)-Dodeca-1,3-diene (12d)</b>                                                                                                                                               | S39 |
| Hydrovinylation of ( <i>E/Z</i> )-dodeca-1,3-diene using[DPPB]CoCl <sub>2</sub> (Table 3, Entry 5).                                                                                    |     |
| Hydrovinylation of ( <i>E/Z</i> )-dodeca-1,3-diene using ( <i>S,S</i> )[DIOP]CoCl <sub>2</sub> (Table 5, Entry 10)                                                                     |     |
| <b>1-Cyclohexyl-1,3-butadiene (12e)</b>                                                                                                                                                | S45 |
| Hydrovinylation of ( <i>E/Z</i> )-1-cyclohexyl-1,3-butadiene using[DPPB]CoCl <sub>2</sub> (Table 3, Entry 6):                                                                          |     |
| Unsuccessful hydrovinylation of (only <i>Z</i> )-1-cyclohexyl-1,3-butadiene using ( <i>S,S</i> )[DIOP]CoCl <sub>2</sub> and TMA (Table 3, Entry 6, but only <i>Z</i> -isomer).         |     |
| <b>(<i>E</i>)-1,3-pentadiene (12f)</b>                                                                                                                                                 | S55 |
| Hydrovinylation of ( <i>E</i> )-1,3-pentadiene using [DPPB]CoCl <sub>2</sub> /Me <sub>3</sub> Al at – 10 °C (Table 3, Entry 7).                                                        |     |
| Hydrovinylation of ( <i>E</i> )-1,3-pentadiene using ( <i>R,R</i> )-[DIOP]CoCl <sub>2</sub> /Me <sub>3</sub> Al at – 45 °C (Table 5, Entry 12).                                        |     |
| <b>(<i>E</i>)-1-phenyl-1,3-butadiene (12g)</b>                                                                                                                                         | S64 |
| Hydrovinylation of ( <i>E</i> )-1-phenyl-1,3-butadiene using[dppp]CoCl <sub>2</sub> (Table 3, Entry 8)                                                                                 |     |
| Hydrovinylation of ( <i>E</i> )-1-phenyl-1,3-butadiene using [dppm]CoCl <sub>2</sub> (Table 3, Entry 10)                                                                               |     |
| Hydrovinylation of ( <i>E</i> )-1-phenyl-1,3-butadiene using ( <i>SS</i> )[DIOP]CoCl <sub>2</sub> (Table 5, Entry 13)                                                                  |     |
| <b>(<i>E</i>)-ethyl hexa-3,5-dienoate (12h)</b>                                                                                                                                        | S76 |

|                                                                                                                                       |      |
|---------------------------------------------------------------------------------------------------------------------------------------|------|
| Hydrovinylation of ( <i>E</i> )-ethyl hexa-3,5-dienoate using [DPPM]CoCl <sub>2</sub> (Table 3, Entry 14)                             |      |
| <b>(<i>E</i>)-6-benzyloxy-1,3-hexadiene (12i)</b>                                                                                     | S82  |
| Hydrovinylation of ( <i>E</i> )-6-benzyloxy-1,3-hexadiene using [dppb]CoCl <sub>2</sub> (Table 3, Entry 15)                           |      |
| Asymmetric hydrovinylation of ( <i>E</i> )-6-benzyloxy-1,3-hexadiene using ( <i>S,S</i> )-[DIOP]CoCl <sub>2</sub> (Table 5, Entry 17) |      |
| <b>(<i>E/Z</i>)-hexa-3,5-dienylbenzene (12j)</b>                                                                                      | S92  |
| Hydrovinylation of ( <i>E/Z</i> )-hexa-3,5-dienylbenzene using [dppb]CoCl <sub>2</sub> (Table 3, Entry 16)                            |      |
| <b>(<i>E</i>)-4-(buta-1,3-dienyl)-<i>N,N</i>-dimethylaniline (12k)</b>                                                                | S97  |
| Hydrovinylation of ( <i>E</i> )-4-(buta-1,3-dienyl)- <i>N,N</i> -dimethylaniline using DPPBCoCl <sub>2</sub> (Table 3, Entry 17)      |      |
| <b>(<i>E</i>)-1-phenyl-2-methyl-1,3-butadiene (12l)</b>                                                                               | S103 |
| Hydrovinylation of ( <i>E</i> )-1-phenyl-2-methyl-1,3-butadiene using [dppm]CoCl <sub>2</sub> (Table 3, Entry 18 and 19).             |      |
| <b>7-Methyl-3-methylene-octa-1,6-diene (<math>\beta</math>-myrcene) (12m)</b>                                                         | S108 |
| Hydrovinylation of 7-methyl-3-methylene-octa-1,6-diene ( $\beta$ -myrcene) using [dppp]CoCl <sub>2</sub> (Table 3, Entry 21)          |      |
| <b>Isoprene (12n)</b>                                                                                                                 | S114 |
| Hydrovinylation of Isoprene using [dppp]CoCl <sub>2</sub> (Table 3, Entry 22)                                                         |      |
| <b>References</b>                                                                                                                     | S119 |

## SUPPORTING INFORMATION

### Cobalt-Catalyzed Hydrovinylation of 1,3-Dienes

Yam N. Timsina, Rakesh K. Sharma,<sup>+</sup> T. V. RajanBabu\*

Department of Chemistry and Biochemistry, The Ohio State University, 100 West 18th Avenue,  
Columbus, Ohio 43210, USA

(e-mail: rajanbabu.1@osu.edu)

**General methods.** Reactions requiring air-sensitive manipulations were conducted under an inert atmosphere of nitrogen or argon by using Schlenk techniques or a Vacuum Atmospheres glovebox. Ethylene (99.5%) was purchased from Matheson Inc., and passed through a column of Drierite® before use. All chemicals obtained from commercial sources were used as received unless otherwise mentioned. All dienes, unless otherwise mentioned, were prepared via Wittig reaction of the corresponding aldehydes with the Wittig reagent generated from methyl triphenylphosphonium bromide and *n*-BuLi in THF. Tetrahydrofuran and diethyl ether were distilled under nitrogen over sodium/benzophenone. Dichloromethane and toluene were purified by distillation from calcium hydride, and subsequently storing over 4 Å molecular sieve. Analytical TLC was performed on E. Merck precoated (0.25 mm) silica gel 60 F254 plates. Flash column chromatography was carried out on silica gel 40 (Scientific Adsorbents Incorporated, Microns Flash). Absence of polymeric impurities was ascertained by NMR of the crude materials. Except for the volatile materials, the isolated yields of the products were not significantly different from the conversions. The percentage compositions for isomeric products was determined by uncalibrated analysis of the areas. This is possible since the response of volatile isomeric hydrocarbons are essentially same in flame ionization detection as determined by comparison of GC-derived compositions with that obtained from <sup>1</sup>H NMR in several cases. Gas chromatographic analyses were performed on Agilent gas chromatographs using a HP-1 Methylsilicone column [30 m x 0.250 mm, 0.25 µm film thickness, achiral stationary phase (or ASP) GC column] and an FID detector. Enantiomeric excesses of chiral compounds were determined by chiral stationary phase gas chromatographic (CSP GC) analyses, which were performed on a Hewlett-Packard 5890 with Cyclodex-B capillary GC column (60 m x 0.25 mm, 0.25 µm film thickness) or on an Agilent 7820A using a Cyclosil-B capillary GC column (25 m x 0.25 mm, 0.25 µm film thickness) using helium or hydrogen as a carrier gas. The columns containing Chiral Stationary Phase (CSP) materials were also used for analysis of some of the geometric isomers because they gave better separation. These are indicated under appropriate chromatograms. Where ever appropriate, %ee's were determined from chromatograms where base-line separation of the enantiomers was achieved for an authentic racemic mixture. Limits of detection of the minor enantiomer were established by analyzing mixtures of both enantiomers of known compositions. Optical rotations were recorded on a Rudolph Research Analytical AUTOPOL VI polarimeter in the solvents mentioned. Unless otherwise mentioned, the measurements were done on a filtered (45 micron filter) solution at the sodium line at room temperature. <sup>1</sup>H and <sup>13</sup>C NMR spectra were recorded either on a spectrometer operating at 500 MHz for <sup>1</sup>H and 125 MHz for <sup>13</sup>C, or a machine operating at 400 MHz for <sup>1</sup>H and 162.02 MHz for <sup>31</sup>P. Proton chemical shifts were internally referenced to the residual solvent proton resonance (e.g., CHCl<sub>3</sub> at δ 7.26). In several instances where there is a minor deviation, position of a reference peak is included in the data to facilitate assignments. Coupling constants are

reported in Hz. Phosphorous ( $^{31}\text{P}$  NMR) are reported as  $\delta$  in units of parts per million (ppm) relative to external  $\text{H}_3\text{PO}_4$  ( $\delta$  0.0).

## Synthesis of Cobalt Complexes

Literature methods<sup>1</sup> were used for preparation of complexes  $\text{Co}(\text{dppm})\text{Cl}_2$  and  $\text{Co}(\text{dppp})\text{Cl}_2$ . For the preparation of  $\text{Co}(\text{dppb})\text{Cl}_2$ ,  $[(RR)-(-)(\text{DIOP})\text{CoCl}_2]$ ,  $[(SS)-(+)-(\text{DIOP})\text{CoCl}_2]$  and  $[(SS)-(-)(\text{BDPP})\text{CoCl}_2]$  modified procedures (see below) were used. Solid-state structures of these two complexes have been reported in our previous publication.<sup>2</sup>

**Typical modified procedure for synthesis of cobalt complexes:  $[(R,R)\text{-DIOP}]\text{CoCl}_2$ .** A 25-mL dry round bottom flask loaded with anhydrous  $\text{CoCl}_2$  (10.9 mg, 0.0839 mmol) was charged with THF (5 mL). On stirring at room temperature for 15 min, a clear deep blue solution formed. A solution of  $(R,R)$ -DIOP (41.8 mg, 0.0839 mmol) in dry and degassed ether (5 mL) was added dropwise to yield a blue turbid solution. After stirring at room temperature for 6 h, 20 mL deoxygenated hexane was added in one portion to get a blue solid. The resulting solid was washed with diethyl ether and hexane (1:1) mixture (3 X 5 mL) to remove any unreacted DIOP. Further purification was accomplished by crystallization of the  $\text{Co}(\text{II})$ -complex from a saturated  $\text{CHCl}_3$  solution by slow vapor diffusion of pentane at room temperature. The solid state structure determined by X-ray crystallography has been reported.<sup>2</sup>

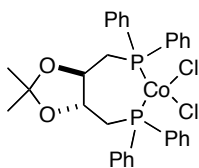

$(4R,5R)$ -(-)-O-Isopropylidene-2,3-dihydroxy-1,4-bis(diphenylphosphino)-butane dichloro cobalt(II): (-)- $[(RR)-(-)(\text{DIOP})\text{CoCl}_2]$ . Yield 94%. Elemental analysis calculated for  $\text{C}_{31}\text{H}_{32}\text{Cl}_2\text{CoO}_2\text{P}_2$ : C, 59.25; H, 5.13. Found: C, 56.60; H, 5.09.  $[\alpha]_{405}^{25} (\text{CHCl}_3, c 1.25) = -93.7$

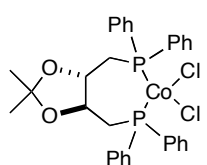

$(4S,5S)$ -(+)-O-Isopropylidene-2,3-dihydroxy-1,4-bis(diphenylphosphino)-butane dichloro cobalt(II): (+)- $[(SS)-(+)-(\text{DIOP})\text{CoCl}_2]$ ; Yield 92%. Elemental analysis calculated for  $\text{C}_{31}\text{H}_{32}\text{Cl}_2\text{CoO}_2\text{P}_2$ : C, 59.25; H, 5.13. Found C, 57.05; H, 5.12.  $[\alpha]_{405}^{25} (\text{CHCl}_3, c 1.25) = +88.8$

$[(S,S)\text{-BDPP}]\text{CoCl}_2$ . Cobalt chloride (50.5 mg, 0.390 mmol) was added to a previously flame-dried 50-mL round two-necked bottom flask fitted with a flow control gas inlet and magnetic stir-bar loaded in a glove box under nitrogen. Outside the box, the nitrogen atmosphere was removed and the flask purged with dry argon. Freshly distilled, degassed THF (5 mL) was added, and upon stirring at room temperature for 15 min, a clear deep blue solution formed. A solution of  $(S,S)$ -BDPP (181 mg, 0.410 mmol) in freshly distilled, degassed ether (5 mL) was added dropwise to yield a blue turbid solution. After stirring at room temperature for 12 h, 20 mL freshly distilled, degassed hexane was added in one portion to yield a blue precipitate. The resulting precipitate was filtered under argon atmosphere, and washed with diethyl ether and hexane (1:1) mixture (3 X 5 mL) to remove any unreacted  $(SS)$ -BDPP, resulting in quantitative yield of a light blue solid, which was used with no further purification. A sample was recrystallized from saturated  $\text{CHCl}_3$  solution by slow vapor diffusion of pentane at room temperature. The solid-state structure determined by X-ray crystallography has been reported.<sup>2</sup>

$(2S,4S)$ -(-)-2,4-Bis(diphenylphosphino)-pentane dichlorocobalt(II): (+)- $[(SS)-(-)(\text{BDPP})\text{CoCl}_2]$ . Yield 96%. Elemental analysis calculated for  $\text{C}_{29}\text{H}_{30}\text{Cl}_2\text{CoP}_2$ : C, 61.07; H, 5.30. Found C, 60.69; H, 5.28.

$[\alpha]_{405}^{25}$  (CHCl<sub>3</sub>, *c* 1.00) = + 271.0;  $[\alpha]_{436}^{25}$  (CHCl<sub>3</sub>, *c* 1.00) = + 132.0;  $[\alpha]_{546}^{25}$  (CHCl<sub>3</sub>, *c* 1.00) = + 164.0

Cobalt(II)-complexes of ligands listed in Table 1 and Figure 5 were similarly prepared and used for hydrovinylation under conditions listed in various tables.

**Synthesis of cobalt complexes of *N*-heterocyclic carbene ligand (Figure 3).** In a typical procedure the bromide salt of a carbene precursor (195 mg, 0.46 mmol, 1 equiv.) and potassium *tert*-butoxide (306 mg, 2.73 mmol, 6 equiv.) were added to a previously oven-dried 20-mL round bottom flask with magnetic stir-bar loaded in a glove box under nitrogen. Freshly distilled THF (5 mL) was added and stirred at room temperature for 36 hours under nitrogen in glove box. The reaction solution was passed through a pad of celite in dry box and the solvent was evaporated under vacuum to get free carbene. Anhydrous CoCl<sub>2</sub> (48 mg, 0.37 mmol, 0.95 equiv.) was added to a previously oven-dried 20-mL round bottom flask with sidearm fitted with a flow control gas inlet and magnetic stir-bar loaded in a glove box under nitrogen. The flask was removed from the drybox and the nitrogen atmosphere was removed and the flask purged with dry argon. Freshly distilled, degassed THF (4 mL) was added, and upon stirring at room temperature for 15 min, a clear deep blue solution formed. A solution of free carbene (104 mg, 0.39 mmol, 1 equiv.) in freshly distilled degassed THF (2 mL) was added dropwise to yield a blue solution. After stirring at room temperature for 32 h, 10 mL freshly distilled, degassed hexane was added in one portion to yield a blue precipitate. The resulting precipitate was filtered under argon atmosphere, and washed with diethyl ether and hexane (1:1) mixture (3 x 10 mL) to remove any unreacted carbene, resulting in quantitative yield of a light blue solid, which was used in hydrovinylation with no further purification.

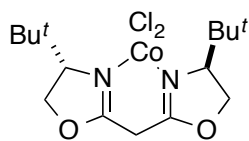

**Synthesis of CoCl<sub>2</sub>[*tert*-butyl bis-oxazoline] complex.** Similar procedure was used for synthesis of cobalt complexes from dinitrogen based chelating ligands (–)-sparteine and the bis-oxazoline complexes (Figure 3). As a typical procedure, anhydrous CoCl<sub>2</sub> (23 mg, 0.18 mmol, 1 equiv.) was added to a previously oven-dried 20-mL round bottom flask with sidearm fitted with a flow control gas inlet under nitrogen. The nitrogen atmosphere was removed and the flask purged with dry argon. Freshly distilled, degassed THF (3 mL) was added, and upon stirring at room temperature for 20 min, a clear deep blue solution formed. A solution of the *t*-butyl bis-oxazoline ligand (51 mg, 0.19 mmol, 1.05 equiv.) in freshly distilled degassed THF (3 mL) was added dropwise to yield a blue solution. After stirring at room temperature for 36 h, 15 mL freshly distilled, degassed hexane was added in one portion to yield a blue precipitate. The resulting precipitate was filtered under argon atmosphere, and washed with diethyl ether and hexane (1:1) mixture (3 x 15 mL) to remove any unreacted ligand, resulting in quantitative yield of a light blue solid, which was used for hydrovinylation of 1,3-dienes with no further purification.

**Synthesis of [dppe]FeCl<sub>3</sub> complex.** As a typical procedure, anhydrous FeCl<sub>3</sub> (45 mg, 0.28 mmol, 1 equiv.) was added to a previously oven-dried 20-mL round bottom flask with sidearm fitted with a flow control gas inlet under nitrogen. Freshly distilled, degassed THF (2 mL) was added, and upon stirring at room temperature for 20 min, a black-brown solution formed. A solution of DPPE (47 mg, 0.29 mmol, 1.05 equiv.) in freshly distilled degassed THF (3 mL) was added dropwise to yield a light pink solution. After stirring at room temperature for 24 h, 15 mL

freshly distilled, degassed hexane was added in one portion to yield a blue precipitate. The resulting precipitate was filtered under argon atmosphere, and washed with diethyl ether and hexane (1:1) mixture (3 x 15 mL) to remove any unreacted dppe, resulting in good yield of a light blue solid (130 mg, 84%), which was used for hydrovinylation of 1,3-dienes with no further purification.

**Synthesis of Methylaluminoxane.**<sup>3</sup> A flame-dried 250 mL three-necked round-bottom flask equipped with a septum, flow control gas inlet, temperature probe, and magnetic stir-bar was purged with argon and charged with 3.85 g  $\text{Al}_2(\text{SO}_4)_3 \cdot 16 \text{H}_2\text{O}$ , 15 mL dry, distilled toluene and chilled to  $-10^\circ\text{C}$  using a salt/ice bath. To this slurry was added 20 mL 2 M trimethylaluminum solution in toluene stored at  $0^\circ\text{C}$  dropwise via syringe with vigorous stirring. The ice bath was removed and the solution allowed to warm to room temperature slowly, and then heated to  $30^\circ\text{C}$  for 4 hrs. After the first heating period, the mixture was then slowly brought to  $50^\circ\text{C}$  and stirred for 8 hrs overnight. A Schlenk filter (12" column fitted with two male ground glass joints and a microporous frit in the center) and a 250 mL single-necked round-bottom were flamed dried and attached to the 250 mL three-necked flask. The solution was filtered to remove the solids and the resulting toluene filtrate was distilled to remove the toluene to give a white glassy solid that was harvested in an inert atmosphere glovebox to get the product as a white solid 0.610 g (26% yield)

## Synthesis of Substrates

**Synthesis of (*E*)-6-benzyloxy-1,3-hexadiene (12i).** A 250 mL flask with sidearm equipped with a magnetic stirring bar, purged with nitrogen, was charged with methyltriphenylphosphonium bromide (6.31 g, 17.66 mmol, 1.1 equiv.) and anhydrous THF (25.0 mL). *n*-BuLi (2.5 M in hexane, 7.1 mL, 17.66 mmol, 1.1 equiv.) was added dropwise via syringe at  $0^\circ\text{C}$  and the reaction mixture was allowed to stir at  $0^\circ\text{C}$  for 2 h. A solution of (*E*)-5-(benzyloxy)pent-2-enal (3.0 g, 15.77 mmol) dissolved in anhydrous THF was added dropwise and the reaction mixture was allowed to stir at ambient temperature for 12 h. The reaction mixture was diluted with pentane, filtered over Celite<sup>®</sup> and the filtrate was concentrated and purified via flash column chromatography (pentane-ether, 20:1) to yield the 1,3 diene (2.04 g, 69%) as a *E*-1,3-diene.  $^1\text{H}$  NMR and  $^{13}\text{C}$  NMR agreed with published data.<sup>2</sup>  $^1\text{H}$  NMR ( $\text{CDCl}_3$ , 400 MHz): 2.48 (q,  $J = 4$  Hz, 2 H), 3.59 (t,  $J = 8$  Hz, 2 H), 4.58 (s, 2 H), 5.05 (d,  $J = 8$  Hz, 1 H), 5.17 (d,  $J = 16$  Hz, 1 H), 5.75 – 5.82 (m, 1 H), 6.15 – 6.22 (m, 1 H), 6.33 – 6.43 (m, 1 H), 7.31 – 7.43 (m, 5 H, aromatic). Gas Chromatography: CSP GC (Cyclosil, OT  $150^\circ\text{C}$ / isothermal)  $R_T$  for diene = 12.357 min. Methyl silicone SP GC (OT  $150^\circ\text{C}$ / isothermal)  $R_T$  for diene product = 10.492 min.

All the (*E*)-1,3-dienes as well as like **12a**, **12b**, **12c**, **12d**, and **12e** were prepared by the literature methods of Wittig olefination using the corresponding aldehyde. Dienes like  $\beta$ -myrcene (**12m**), isoprene (**12n**) and (*E*)-1,3-pentadiene (**12f**) were purchased directly and used after proper distillation.

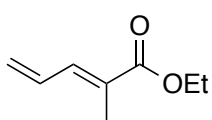

**Synthesis of (*E*)-ethyl-2-methyl-penta-2,4-dienoate.** A 250 mL flask with sidearm equipped with a magnetic stirring bar, purged with nitrogen, was charged with (1-ethoxycarbonyl)ethyltriphenylphosphonium bromide (5.0 g, 11.28 mmol, 1.0 equiv.) and anhydrous  $\text{CH}_2\text{Cl}_2$  (20.0 mL). Potassium

hydroxide (KOH) (0.8 gm, 13.54 mmol, 1.2 equiv.) as aqueous solution was added dropwise and stirred for 3 hrs at room temperature. A solution of acrolein (0.8 g, 13.54 mmol) dissolved in anhydrous CH<sub>2</sub>Cl<sub>2</sub> was added dropwise and the reaction mixture was refluxed for 3 hrs and stirred 24 hrs at room temperature. The reaction mixture was diluted with petroleum ether, filtered over Celite<sup>®</sup> and the filtrate was concentrated and purified via flash column chromatography (Hex-EtOAc, 7:1) to yield the 1,3 diene (0.6 g, 38%) as a *E*-1,3-diene. <sup>1</sup>H NMR and <sup>13</sup>C NMR agreed with published data.<sup>5-7</sup> <sup>1</sup>H NMR (CDCl<sub>3</sub>, 400 MHz): 1.29 (t, J = 7.2 Hz, 3 H), 1.93 (s, 3 H), 4.20 (q, J = 7.2 Hz, 2 H), 5.42 (d, J = 8 Hz, 1 H), 5.53 (d, J = 16 Hz, 1 H), 6.59 – 6.68 (m, 1 H), 7.13 (d, J = 12 Hz, 1 H). CSP GC (OT 80 °C/ isothermal, H<sub>2</sub> carrier gas) Conditions: R<sub>t</sub> for diene product = 14.28 min.

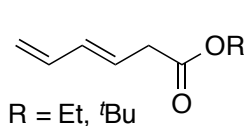

**Synthesis of (*E*)-ethyl-hexa-3,5-dienoate and (*E*)-*t*-Bu-hexa-3,5-dienoate.** A 250 mL flask with condenser equipped with a magnetic stirring bar, purged with nitrogen, was charged with hexa-2,4-dienoic acid (12.0 g, 107 mmol, 1.0 equiv.) and 5 drops of DMF and 3 boiling chips were added. Thionyl chloride (19 g, 161 mmol, 1.5 mmol) was added from the top of the condenser dropwise and refluxed 30 minutes. HCl and SO<sub>2</sub> gas were trapped by dil. NaOH solution through out the reflux period and the reaction was stopped when there was no more evolution of HCl and SO<sub>2</sub> gas through the NaOH solution. Hexa-2,4-dienoyl chloride (10 g, 71% ) was distilled out from the same round bottom flask and directly used for the next set up reaction for diene synthesis. Freshly distilled ethyl alcohol (5.6 g, 123 mmol, 2 equiv.) and freshly distilled triethyl amine (12.4 g, 122.54 mmol, 2 equiv.) were mixed in 120 mL CH<sub>2</sub>Cl<sub>2</sub> and chilled under dry ice/acetone. Hexa-2,4-dienoyl chloride (8 g, 61.27 mmol, 1 equiv.) was added dropwise via syringe. After 1 hr, a thick white precipitate appeared and the reaction was allowed to warm to room temperature and left overnight. Around 200 mL water was added and partitioned between water and DCM. The organic layer was washed (2 X 10% H<sub>2</sub>SO<sub>4</sub>, 1 X saturated NaHCO<sub>3</sub>, 1 x H<sub>2</sub>O, 1 X brine) and dried with MgSO<sub>4</sub> and solvent was evaporated to get crude diene. A few crystals of BHT were added to the crude product which was then distilled to afford ethyl-3,5-hexadienoate (5.1 g, 59%). <sup>1</sup>H NMR and <sup>13</sup>C NMR agreed with published data.<sup>8-9</sup>

Same procedure was applied to synthesize (*E*)-*t*-Bu-3,5-hexadienoate by using *t*-butyl alcohol instead of ethyl alcohol.

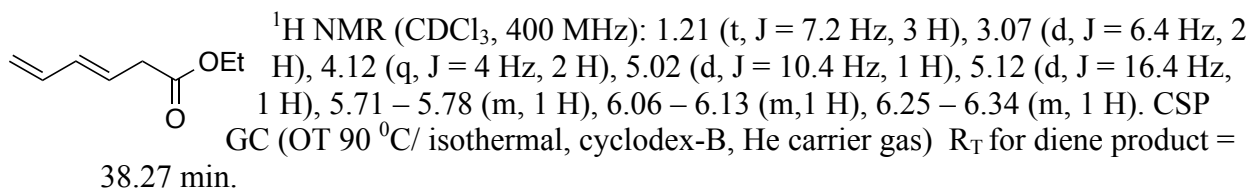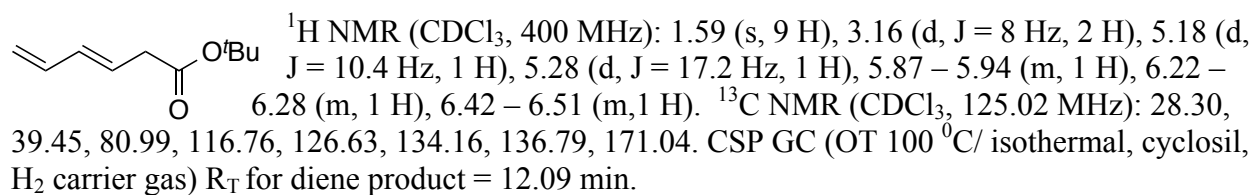



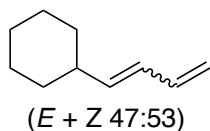

**Synthesis of (*Z/E*)-1-cyclohexyl-1,3-butadiene and other related dienes.** As a typical procedure to make (*E/Z*)-mixture of 1-cyclohexyl-1,3-butadiene, a 250 mL flask with sidearm equipped with a magnetic stirring bar, purged with nitrogen, was charged with allyltriphenylphosphonium bromide (7.0 g, 18.0 mmol, 1.5 equiv.) and anhydrous THF (30.0 mL). Base *n*-BuLi (2.5 M in hexane, 6.5 mL, 16.2 mmol, 0.9 equiv.) was added dropwise via syringe at 0 °C and the reaction mixture was allowed to stir at 0 °C for 1 h. A solution of cyclohexanecarboxaldehyde (1.82 g, 16.2 mmol) dissolved in anhydrous THF was added dropwise and the reaction mixture was allowed to stir at ambient temperature for 12 h. The reaction mixture was diluted with pentane, filtered over Celite® and the filtrate was concentrated and purified via flash column chromatography (pentane-ether, 20:1) to yield the 1,3 diene (1.30 g, 59%) as a mixture of *Z*- and *E*-isomers (53:47, by GC). <sup>1</sup>H NMR and <sup>13</sup>C NMR agreed with published data.<sup>10-11</sup> <sup>1</sup>H NMR (CDCl<sub>3</sub>, 400 MHz): δ 1.05-1.30 (m, 11 H, both *E* and *Z*) 1.61-1.72 (m, 9 H, both *E* and *Z*), 1.96 – 1.98 (m, 1 H, *E* only), 2.41 – 2.44 (m, 1 H, *Z* only), 4.93 (d, J = 9 Hz, 1 H, *E* only), 5.03 – 5.17 (m, 3 H, overlapped *E* and *Z*), 5.29 (t, J = 10 Hz, 1 H, *Z* only), 5.64 (dd, J = 5, 16 Hz, 1 H, *E* only), 5.86 (t, J = 11 Hz, 1 H, *Z* only), 5.96 – 6.02 (m, 1 H, *E* only), 6.23 – 6.33 (m, 1 H, *E* only), 6.58 – 6.68 (m, 1 H, *Z* only). <sup>13</sup>C NMR (CDCl<sub>3</sub>, 125.72 MHz): 26.07, 26.22, 26.38, 32.97, 33.45, 37.07, 40.84, (both *E* and *Z* overlapped), 114.90 (*E*), 116.88 (*Z*), 127.47 (*Z*), 128.53 (*E*), 132.81 (*Z*), 137.88 (*E*), 139.15 (*Z*), 141.51 (*E*).  
Gas Chromatography: (Cyclosil, temp. 80 °C / isothermal, H<sub>2</sub> carrier gas) starting material R<sub>T</sub> = 18.63 min for *Z*-diene and 26.243 min for *E* diene.

Similar procedure was used for the synthesis of (*E/Z*)-mixture of 1,3-dienes like (*E/Z*) dodeca-1,3-diene (**12d**), (*E/Z*)1-phenyl-1,3-butadiene (**12g**) and (*E/Z*) hexa-3,5-dinylbenzene (**12j**) using corresponding aldehyde and allyltriphenylphosphonium bromide.

## X<sub>2</sub>Co(L)-Catalyzed Hydrovinylation of 1,3-Dienes

**Hydrovinylation of (*E*)-nona-1,3-diene using [DPPB]CoCl<sub>2</sub> (Table 1, Entry 9, Typical procedure for ligand screening).** To an oven dried round bottom flask with a sidearm, was added [DPPB]CoCl<sub>2</sub> (35 mg, 0.063 mmol) dissolved in dichloromethane (1 mL) at room temperature. Trimethylaluminium as a 2M solution in toluene (0.17 mL, 0.32 mmol) was added dropwise and the color of the solution changed from deep blue to red brown with the formation of white fumes over the solution. After 2 to 3 minutes, the reaction vessel was carefully evacuated and then refilled with ethylene from a balloon. The reaction vessel was kept at 0 °C temperature and (*E*)-nona-1,3-diene (78 mg, 0.63 mmol) in dichloromethane (0.5 mL) solution added under ethylene and the mixture was stirred for 0.5 h. The ethylene balloon was removed and 0.1 mL of methanol was added to the flask. The reaction solution was diluted with pentane (3 mL) and subsequently passed through a silica plug. The plug was washed with pentane (3 x 5 mL). Removal of solvent yielded the product as colorless oil (96% 1,4-*Z* (**13a**) and 1,4-linear (**16a**) by GC and NMR analysis.

All the reactions in Table 1 were performed in similar fashion using the conditions described in the Table 1 using Co(II)-complexes prepared as described before. Some typical procedures are described below after details of the identification of the isomeric products from **12a**.

## Identification of Products of Hydrovinylation of (*E*)-nona-1,3-diene (12a)

[The following data extracted from ref. 2, which also contains details of gas chromatographic analysis including chiral stationary phase separations of various isomers. The reported ee's were determined from these gas chromatograms.]

**Hydrovinylation of (*E*)-nona-1,3-diene (13a) using [dppb]CoCl<sub>2</sub>/Me<sub>3</sub>Al at -10 °C (Entry 9, Table 1), or using [DIOP]CoCl<sub>2</sub> at -45 °C (Entry 8, Table 4)**

**(*Z*)-4-Vinylnon-2-ene (13a):** <sup>1</sup>H NMR (500 MHz, CDCl<sub>3</sub>): δ 0.869 (t, J = 7 Hz, 3 H, H<sup>9</sup>), 1.21-1.35 (m, 7 H), 1.38-1.45 (m, 1 H) 1.21-1.45 total 8 H, 1.622 (dd, J = 6.5 Hz, 2 H, 3 H, H<sup>1</sup>), 3.011 (m, 1 H, H<sup>4</sup>), 4.929 (ddd, J = 10 Hz, 1.5 Hz, 1.5 Hz, 1 H, H<sup>11</sup>), 4.982 (ddd, J = 17.5 Hz, 1.5 Hz, 1.5 Hz, 1 H, H<sup>12</sup>), 5.216 (ddq, 10 Hz, 10 Hz, 1.5 Hz, H<sup>3</sup>), 5.495 (dq, 10.5 Hz, 6.5 Hz, 1 H, H<sup>2</sup>), 5.709 (ddd, 17 Hz, 10 Hz, 7 Hz, 1H, H<sup>10</sup>). Assignments and coupling confirmed by COSY and NOESY (CH<sup>1</sup><sub>3</sub>→H<sup>4</sup>).

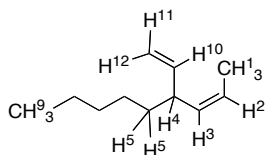

<sup>13</sup>C NMR (CDCl<sub>3</sub>): 13.02, 14.07, 22.63, 26.79, 31.90, 35.24, 41.26, 112.87, 123.78, 133.23, 141.87. The peak at δ 14.07 (due to the vinyl methyl carbon is at a higher field compared to the corresponding peak in the corresponding (*E*)-isomer, which appears at δ 17.96, see below). IR (neat cm<sup>-1</sup>): 3079 (w), 3111 (m), 2959 (s), 2927 (s), 2858 (s), 1636 (m), 992 (w), 909 (m), 724 (m)- 724 cm<sup>-1</sup> is characteristic of a (*Z*)-alkene. Absence of peaks ~ 960-970 cm<sup>-1</sup> indicates absence of the (*E*)-isomer, **14a**.

ESI-MS; m/z 191.1 [M+K]; mass calculated for C<sub>11</sub>H<sub>20</sub>K, 191.1.

Product from (*RR*)-(-)-DIOP [α]<sub>D</sub><sup>25</sup> = -20.9 (hexane, c 1.15)

Gas Chromatography: (Polymethylsiloxane): 80 °C *R<sub>T</sub>* **13a**: 21.169 min.; **14a**: 21.93min.; **15a** 22.77 min.; CSP GC (Cyclodex B) 60 °C **13a**: *R<sub>T</sub>* = 26.07 min. (*S*), 27.25 (*R*); **16a** 44.79 min.

**Isomeric hydrovinylation products obtained from (*E*)-nona-1,3-diene (13a) using [dppm]CoCl<sub>2</sub>/Me<sub>3</sub>Al (Entries 12 and 13, Table 1)**

**(*E*)-4-vinylnon-2-ene (14a):** <sup>1</sup>H NMR (CDCl<sub>3</sub>): δ 0.85-0.91 (m, 3 H, H<sup>9</sup>), 1.21-1.41 (m, H<sup>5</sup>, H<sup>6</sup>, H<sup>7</sup>, H<sup>8</sup>), 1.669 (dd, J = 6 Hz, 0.5 Hz, 3 H, H<sup>1</sup>), 2.619 (pent, J = 7.5 Hz, 1 H, H<sup>4</sup>), 4.931 (dm, J = 10 Hz, 1 H, H<sup>11</sup>), 4.977 (dm, J = 17.5 Hz, 1 H, H<sup>12</sup>), 5.29-5.45 (m, 2H, H<sup>2</sup>, H<sup>3</sup>), 5.706 (ddd, J = 17.5, 10, 7.5 Hz, 1 H, H<sup>10</sup>). Chemical shifts and coupling constants assigned by COSY and double irradiation experiments.

<sup>13</sup>C NMR (CDCl<sub>3</sub>): δ 14.07, 17.96 (vinyl Me), 22.63, 26.84, 31.88, 34.86, 46.88, 113.24, 124.53, 134.17, 142.35. The peak at δ 17.96 (due to vinyl methyl carbon is at a lower field compared to the corresponding peak in the (*Z*)-isomer **13a**, which appears at δ 17.07, see under **13a**, the previous compound.)

Gas chromatography: (polydimethylsiloxane column): see previous experiment.

**(*E*)-3-methyldeca-1,4-diene (15a).** <sup>1</sup>H NMR (CDCl<sub>3</sub>): 0.85-0.91 (m, 3 H, H<sup>10</sup>), 1.075 (d, J = 6.5 Hz, 1 H, H<sup>11</sup>), 1.20-1.40 (m, H<sup>7</sup>,

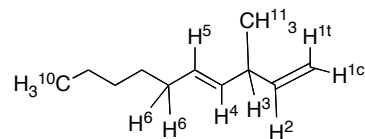

H<sup>8</sup>, H<sup>9</sup>), 1.990 (ddd, J = 6.5, 6.5, 6.5 Hz, 2 H, H<sup>6</sup>), 2.807 (ddq, J = 6.0, 6.0, 6.0 Hz, H<sup>3</sup>), 4.931 (dm, J = 10 Hz, 1H, H<sup>1c</sup>), 4.977 (dm, J = 17.5 Hz, 1 H, H<sup>1t</sup>), 5.352 (dd, J = 15.5, 6.5 Hz, 1 H, H<sup>4</sup>), 5.416 (dt, J = 15.5, 6.5, 1 H, H<sup>5</sup>), 5.791 (ddd, J = 17, 10.5, 6.5 Hz, 1 H, H<sup>2</sup>). Chemical shifts and coupling constants assigned by COSY and double irradiation experiments.  
<sup>13</sup>C NMR (CDCl<sub>3</sub>): 14.04, 20.00, 22.54, 29.23, 31.41, 32.55, 40.31, 112.37, 129.44, 133.86, 143.40.

Gas chromatography: (polydimethylsiloxane column) : see under **13a**.

**Procedure for Co-catalyzed hydrovinylation of (*E*)-nona-1,3-diene using [dppb]CoBr<sub>2</sub> (Table 1, Ligand Screening, Entry 10).** To an oven dried round-bottom-flask with a sidearm, was added [dppb]CoBr<sub>2</sub> (16 mg, 0.025 mmol) and under argon it was dissolved in dichloromethane (1 mL) at room temperature. Trimethylaluminium as a 2M solution in toluene (0.12 mL, 0.24 mmol) was added dropwise and the color of the solution changed from blue to red brown with the formation of white fumes over the solution. After 2 to 3 minutes, the reaction vessel was carefully evacuated and then refilled with ethylene from a balloon. The reaction vessel was cooled to -20 °C and (*E*)-nona-1,3-diene (30 mg, 0.24 mmol) in a dichloromethane (1 mL) added under ethylene and the mixture was stirred for 20 h. The progress of the reaction was monitored via gas chromatography until completion. The ethylene balloon was removed and 0.1 mL methanol was added to the flask. The solution was diluted with pentane (5 mL) and warmed to room temperature and subsequently passed through a silica plug. The plug was washed with pentane (3 x 5 mL). Removal of solvent yielded the product as colorless oil as 94% (*Z*)-1,4 HV product (**13a**) and 5% (*Z*)-1,4-linear dimerized HV product (**16a**).

**Hydrovinylation of (*E*)-nona-1,3-diene using [dppp]CoCl<sub>2</sub> at room temperature (Ligand screening, Table 1, Entry 7).** To an oven-dried round-bottom flask with a sidearm, was added [dppp]CoCl<sub>2</sub> (11 mg, 0.020 mmol) under argon and it was dissolved in dichloromethane (1 mL) at room temperature. Trimethylaluminum solution (2M) in toluene (0.03 mL, 0.060 mmol) was added dropwise as color of the solution quickly changed from deep blue to brown with the formation of white fumes over the solution. When all the fumes disappeared in about 5 minutes, the reaction vessel was carefully evacuated and then refilled with ethylene from a balloon, a vigorous reaction with evolution of fumes was observed. When this evolution stopped, (*E*)-nona-1,3-diene (25 mg, 0.20 mmol) was added under ethylene at room temperature and the mixture was stirred for 1 h until the completion of reaction monitored via gas chromatography. The ethylene balloon was removed and 0.1 mL of methanol was introduced into the flask and stirring was continued for 5 minutes. The solution was subsequently passed through a silica plug. The plug was washed with pentane (3 x 10 mL). Concentration and removal of solvent yielded the product as a colorless oil and isomeric compositions were determined by gas chromatography and NMR spectroscopy. The ratios of products are indicated in the table.

**Hydrovinylation of (*E*)-nona-1,3-diene using [dppm]CoCl<sub>2</sub> at room temperature (Ligand screening, Table 1, Entry 12).** To an oven-dried round-bottom flask with a sidearm, was added [dppm]CoCl<sub>2</sub> (42 mg, 0.082 mmol) under argon and it was dissolved in dichloromethane (1.5 mL) at room temperature. Trimethylaluminum solution (2M) in toluene (0.13 mL, 0.25 mmol) was added dropwise as color of the solution quickly changed from bluish brown to red brown with the formation of white fumes over the solution. When all the fumes disappeared in around

5 minutes, the reaction vessel was carefully evacuated and then refilled with ethylene from a balloon, a vigorous reaction with evolution of fumes was observed. When this evolution stopped, (*E*)-nona-1,3-diene (102 mg, 0.82 mmol) in dichloromethane (1 mL) was added under ethylene at room temperature and the mixture was stirred for 2 h. The progress of the reaction was monitored via gas chromatography intermittently. After 2 hours, the ethylene balloon was removed and 0.1 mL of methanol was introduced into the flask and stirring was continued for 5 minutes. The solution was subsequently passed through a silica plug. The plug was washed with pentane (3 x 10 mL). Concentration and removal of last traces of solvent yielded the product as a colorless oil and isomeric compositions were determined by gas chromatography and NMR spectroscopy (Table 1, entry 12).

**Hydrovinylation of (*E*)-nona-1,3-diene using [BISBI]CoCl<sub>2</sub> (Ligand Screening, Table 1, Entry 14).** To an oven-dried round-bottom flask with a sidearm, was added [BISBI]CoCl<sub>2</sub> (20 mg, 0.029 mmol) under argon and it was dissolved in dichloromethane (1 mL) at room temperature. Trimethylaluminum solution (2M) in toluene (0.15 mL, 0.29 mmol) was added dropwise as color of the solution quickly changed from blue to red brown with the formation of white fumes over the solution. When all the fumes disappeared in around 5 minutes, the reaction vessel was carefully evacuated and then refilled with ethylene from a balloon, a vigorous reaction with evolution of fumes was observed. When this evolution stopped, (*E*)-nona-1,3-diene (36 mg, 0.29 mmol) in dichloromethane (1 mL) was added under ethylene at -12 °C temperature and the mixture was stirred for 6 h. The progress of the reaction was monitored via gas chromatography intermittently. After 6 hours, the ethylene balloon was removed and 0.1 mL of methanol was introduced into the flask and stirring was continued for 5 minutes. The solution was subsequently passed through a silica plug. The plug was washed with pentane (3 x 10 mL). Concentration and removal of solvent yielded the product as a colorless oil and isomeric compositions [**13a**, 1,4-Z HV (65%) and **15a**, 1,2-E HV (34%)] were determined by gas chromatography and NMR spectroscopy.

### Screening of activators in the Co-Catalyzed hydrovinylation of 1,3-dienes (Table 2)

The typical procedure described above (Hydrovinylation of (*E*)-nona-1,3-diene using [DPPB]CoCl<sub>2</sub> (Table 1, Entry 9) was used in screening various promoters for the reaction (Table 2).

The solid activators like Mn, InI<sub>3</sub>, and Zn/ZnI<sub>2</sub> were added at the same time with cobalt complexes in the round bottom flask with side-arm in the nitrogen atmosphere glove box. Liquid activators like Me<sub>3</sub>B, Et<sub>3</sub>B, Ph<sub>3</sub>B, *i*-BuAlH, LiEt<sub>3</sub>BH (in THF), Et<sub>2</sub>AlOEt, Et<sub>2</sub>AlCl, EtAlCl<sub>2</sub>, PhMgBr, were added in the same way as trimethylaluminium (TMA solution in toluene) to the solution of cobalt complexes via syringe.

Typical experiments are described below:

**Unsuccessful hydrovinylation of nona-1,3-diene using [dppe]CoCl<sub>2</sub> and Mn as promoter (Promoters screening, Table 2, Entry 9).** As a typical procedure, to an oven dried round-bottom-flask with a sidearm, was added DPPECoCl<sub>2</sub> (21 mg, 0.040 mmol) and Mn (22 mg, 0.40 mmol) under argon and was dissolved in dichloromethane (1 mL) at room temperature. After 30 minutes, the reaction vessel was carefully evacuated and then refilled with ethylene from a balloon. The reaction vessel was kept in room temperature and the nona-1,3-diene (50 mg, 0.40

mmol) in dichloromethane (1 mL) added under ethylene and the mixture was stirred for 14 h at room temperature intermittently monitoring the progress of reaction by gas chromatography. The ethylene balloon was removed and 0.1 mL methanol was added to the flask. The solution was diluted with pentane (5 mL) and subsequently passed through a silica plug. The plug was washed with pentane (3 X 6 mL). Removal of solvent recovered the starting material back. GC and NMR analysis showed that the product was not formed at all.

**Hydrovinylation of (*E*)-dodeca-1,3-diene using [DPPP]CoBr<sub>2</sub> and Zn/ZnI<sub>2</sub>. (Promoters screening, Table 2, Entry 20)** To an oven dried round-bottom-flask with a sidearm, was added [DPPP]CoBr<sub>2</sub> (20 mg, 0.032 mmol), Zn dust (4.2 mg, 0.064 mmol) and ZnI<sub>2</sub> (20 mg, 0.064 mmol) under argon and was dissolved in dichloromethane (2 mL) at room temperature. The solution was stirred for at least 30 minutes at room temperature, and then refilled with ethylene from a balloon. The reaction vessel was cooled to 0 °C and (*E*)-dodeca-1,3-diene (53 mg, 0.32 mmol) was added under ethylene. After 1 hour, first aliquot of the reaction mixture was taken out via syringe and flush through a small pad of silica and was analyzed by GC. Reaction was monitored by GC analysis until completion. Finally after stirring the reaction mixture for 4 h at ambient temperature, the ethylene balloon was removed and 0.1 mL methanol was added to the flask. The solution was diluted with pentane (3 mL) and subsequently passed through a silica plug. The plug was washed with pentane (3 x 5 mL). Removal of solvent yielded the product as a mixture of hydrovinylation product (**13d**, 1,4-*Z*, 79%) and linear hydrovinylation product (**16d**, 1,4-*Z*-linear, 21%) from GC and NMR analysis. All the reactions in Table 2 using Zn and ZnI<sub>2</sub> were performed exactly the same way using the conditions described therein.

**Unsuccessful hydrovinylation of (*E*)-dodeca-1,3-diene using DPPBCoCl<sub>2</sub> and diethyl aluminum chloride (Et<sub>2</sub>AlCl) as a promoter (Table 2, Entry 13).** To an oven dried round-bottom-flask with a sidearm, was added DPPBCoCl<sub>2</sub> (35 mg, 0.063 mmol) and under argon it was dissolved in dichloromethane (1 mL) at room temperature. Diethylaluminium chloride (Et<sub>2</sub>AlCl) as a 2M solution in toluene (0.16 mL, 0.32 mmol) was added dropwise and the color of the solution remain unchanged from its blue color. After 2 to 3 minutes, the reaction vessel was carefully evacuated and then refilled with ethylene from a balloon. The reaction vessel was cooled to -10 °C and (*E*)-dodeca-1,3-diene (105 mg, 0.63 mmol) in a dichloromethane (1 mL) added under ethylene and the mixture was stirred for 5 h. The ethylene balloon was removed and 0.1 mL methanol was added to the flask. The solution was diluted with pentane (5 mL) and warmed to room temperature and subsequently passed through a silica plug. The plug was washed with pentane (3 x 10 mL). Removal of solvent and analysis by GC and NMR gave none of the expected hydrovinylation products.

**Unsuccessful hydrovinylation of nona-1,3-diene using [DPPM]CoCl<sub>2</sub> and MeMgBr and AgOTf as promoters (Promoters screening, Table 2, Entry 12).** As a typical procedure, to an oven dried round-bottom-flask with a sidearm, was added [DPPM]CoCl<sub>2</sub> (19 mg, 0.037 mmol) under argon and was dissolved in dichloromethane (1 mL) at room temperature. Methylmagnesium bromide (MeMgBr) as a 3M solution in ether (0.01 mL, 0.037 mmol) was added via syringe and the color of the solution changed from deep blue to black with the formation of white fumes over the solution. Subsequently, AgOTf (9.3 mg, 0.037 mmol) was added to the solution. After 3 minutes, the reaction vessel was carefully evacuated and then refilled with ethylene from a balloon. The reaction vessel was cooled to 0 °C and the nona-1,3-

diene (46 mg, 0.37 mmol) in dichloromethane (1 mL) added under ethylene and the mixture was stirred for 4 h at 0 °C to rt. The ethylene balloon was removed and 0.1 mL methanol was added to the flask. The solution was diluted with pentane (3 mL) and warmed to room temperature and subsequently passed through a silica plug. The plug was washed with pentane (3 X 6 mL). Removal of solvent recovered the starting material back. GC and NMR analysis showed that the product was not formed at all.

**Iron-catalyzed hydrovinylation of (*E*)-nona-1,3-diene using [DPPE]FeCl<sub>3</sub> (Equation 11):** To an oven dried round-bottom-flask with a sidearm, was added [DPPE]FeCl<sub>3</sub> (56 mg, 0.099 mmol) under argon and was dissolved in dichloromethane (1 mL) at room temperature. Trimethylaluminium as a 2M solution in toluene (0.24 mL, 0.49 mmol) was added dropwise and the color of the solution changed from light pink to red brown with the formation of white fumes over the solution. After 2 to 3 minutes, the reaction vessel was carefully evacuated and then refilled with ethylene from a balloon. The reaction vessel was cooled to -10 °C and (*E*)-nona-1,3-diene (61 mg, 0.49 mmol) as a dichloromethane solution (0.5 mL) was added under ethylene and the mixture was stirred for 3 h at ambient temperature. The ethylene balloon was removed and 0.1 mL methanol was added to the flask. The solution was diluted with pentane (5 mL) and warmed to room temperature and subsequently passed through a silica plug. The plug was washed with pentane (3 X 7 mL). Removal of solvent yielded the product as a colorless oil as a mixture of (*Z*)-1,4-product (30%), 1,4-linear dimerized product (10%) and starting material (60%) by GC and NMR analysis.

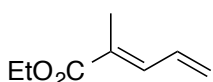

**Unsuccessful hydrovinylation of substrate (*E*)-ethyl-2-methylpenta-2,4-dienoate using [dppm]CoCl<sub>2</sub>.** To an oven dried round-bottom-flask with a sidearm, was added [dppm]CoCl<sub>2</sub> (30 mg, 0.058 mmol) under argon and was dissolved in dichloromethane (1 mL) at room temperature. Trimethylaluminium as a 2M solution in toluene (0.6 mL, 1.16 mmol) was added dropwise and the color of the solution changed from deep blue to red brown with the formation of white fumes over the solution. After 2 to 3 minutes, the reaction vessel was carefully evacuated and then refilled with ethylene from a balloon. The reaction vessel was cooled to 0 °C and (*E*)-ethyl-2-methylpenta-2,4-dienoate (81 mg, 0.58 mmol) as a dichloromethane solution (0.5 mL) added under ethylene and the mixture was stirred for 15 h. The ethylene balloon was removed and 0.1 mL methanol was added to the flask. The solution was diluted with pentane (2 mL) and warmed to room temperature and subsequently passed through a silica plug. The plug was washed with pentane (3 X 5 mL). Removal of solvent recovered the starting material back. GC and NMR analysis showed that the product was not formed at all.

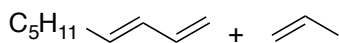

**Unsuccessful attempt to dimerize (*E*)-1,3-nonadiene and propylene using [dppe]CoCl<sub>2</sub> (Equation 10).** To an oven dried round-bottom-flask with a sidearm, was added [dppe]CoCl<sub>2</sub> (30 mg, 0.056 mmol) under argon and was dissolved in dichloromethane (1 mL) at room temperature. Trimethylaluminium as a 2M solution in toluene (0.08 mL, 0.17 mmol) was added dropwise and the color of the solution changed from deep blue to red brown with the formation of white fumes over the solution. After 2 to 3 minutes, the reaction vessel was carefully evacuated and then refilled with propylene from a balloon. The reaction vessel was cooled to -20 °C and (*E*)-1,3-nonadiene (70 mg, 0.56 mmol) as a dichloromethane solution (0.5 mL) was added under propylene and the mixture was stirred

for 14 h. The propylene balloon was removed and 0.1 mL of methanol was added to the flask. The solution was diluted with pentane (4 mL) and warmed to room temperature and subsequently passed through a silica plug. The plug was washed with pentane (3 x 7 mL). Removal of solvent showed no codimerization reaction as all the (*E*)-1,3-nonadiene starting material was recovered as judged by GC and <sup>1</sup>H NMR.

## Cobalt-Catalyzed Hydrovinylation of 1,3-Dienes. Scope of Substrates (Tables 3 and 5)

Hydrovinylation of different dienes and the major products obtained from them are listed below:

### Hydrovinylation of (*E*)-nona-1,3-diene (12a)

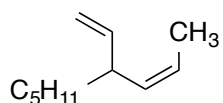

The exploratory studies of effects of ligands and additives were conducted using this substrate. Rigorous identifications of all products from this substrate were described in our original communication.<sup>2</sup> For hydrovinylation procedure for (*E*)-nona-1,3-diene using [DPPB]CoCl<sub>2</sub> (Table 1, Entry 9, see under **Ligand Screening**. Details of the identification of various products were also listed earlier).

**Typical procedure for asymmetric Co-catalyzed hydrovinylation reactions of (*E*)-nona-1,3-diene for ligand screening (Table 4, Entry 1-20).** To an oven-dried round-bottom flask with a sidearm, was added (*RR*)-[DIOP]CoCl<sub>2</sub> (12.6 mg, 0.0201 mmol) under argon and it was dissolved in a mixture of degassed dichloromethane (2.0 mL) and toluene (0.5 mL), at 0 °C. Trimethylaluminum solution (2M) in toluene (4.3 mg, 30 μL, 0.0604 mmol) was added dropwise as color of the solution changed from deep blue to red-brown with the formation of white fumes over the solution. When all the fumes disappeared (typically in 5-10 min depending on complex), the reaction vessel was carefully evacuated and then refilled with ethylene from a balloon. The filled balloon was used to maintain the ethylene atmosphere, while a vigorous reaction with evolution of fumes was observed. This evolution stopped in typically 3-5 min. The reaction vessel was cooled to – 45 °C (or whatever is the prescribed temperature with other ligands and substrates) and (*E*)-nona-1,3-diene (50.0 mg, 0.403 mmol) was added under ethylene and the mixture was stirred for 6 h (color of the reaction solution turned blue again at the end of the reaction). The ethylene balloon was removed and 0.1 mL of methanol was introduced into the flask and stirring was continued for 5 minutes. The solution was warmed to room temperature and was subsequently passed through a silica plug. The plug was washed with pentane (3 x 10 mL). Concentration and removal of last traces of solvent yielded the product as a colorless oil (58.2 mg, 95%). Analysis by GC and NMR showed that the product was essentially pure. Isomeric compositions were determined by gas chromatography and NMR spectroscopy.

Details of the identification of the individual components of the mixture and chromatographic separation of these compounds including those of the enantiomers have been reported before.<sup>2</sup>

The enantioselectivities obtained with various other chiral ligands under different conditions are listed in Table 4. Typical examples are described below:

**Asymmetric Co-catalyzed Hydrovinylation Reactions (*E*)-1,3-nonadiene by using (*S,S,R,R*)-Tangphos [(L14)CoCl<sub>2</sub>] (Table 5, Entry 3).** To an oven-dried round-bottom flask with a sidearm, was added (*S,S,R,R*)-[Tangphos]CoCl<sub>2</sub> (19 mg, 0.046 mmol) under argon and it was dissolved in a degassed dichloromethane (1.0 mL) at room temperature. Trimethylaluminum solution (2M) in toluene (0.07 mL, 0.14 mmol) was added dropwise as color of the solution changed from deep blue to red-brown with the formation of white fumes over the solution.



When all the fumes disappeared (typically in 5 min), the reaction vessel was carefully evacuated and then refilled with ethylene from a balloon. The filled balloon was used to maintain the ethylene atmosphere, while a vigorous reaction with evolution of fumes was observed. This evolution stopped in typically 3 minute. The reaction vessel was cooled to  $-10\text{ }^{\circ}\text{C}$  and (*E*)-nona-1,3-diene (57 mg, 0.46 mmol) in dichloromethane (1 mL) was added under ethylene and the mixture was stirred for 8 h. The ethylene balloon was removed and 0.1 mL of methanol was introduced into the flask and stirring was continued for 5 minutes. The solution was warmed to room temperature and was subsequently passed through a silica plug. The plug was washed with pentane (3 x 10 mL). Concentration and removal of last traces of solvent yielded the product as a colorless oil. Analysis by GC and NMR showed that the product was essentially pure with two major isomers (**13a** product with 39% yield and 95% ee and the linear product **16a** product in 40% yield). Isomeric compositions were determined by gas chromatography and NMR spectroscopy (See attached chromatograms and Spectra).

**Asymmetric Co-catalyzed hydrovinylation reaction (*E*)-1,3-nonadiene by using 1 mol % Josiphos 2 [(18)CoCl<sub>2</sub>] (Table 5, Entry 4).** To an oven-dried round-bottom flask with a sidearm, was added [Josiphos]CoCl<sub>2</sub> (4 mg, 0.0038 mmol) under argon and it was dissolved in a degassed dichloromethane (1.0 mL) at room temperature. Trimethylaluminum solution (2M) in toluene (0.0057 mL, 0.0114 mmol) was added dropwise as color of the solution changed from deep blue to red-brown with the formation of white fumes over the solution. When all the fumes disappeared (typically in 5 min), the reaction vessel was carefully evacuated and then refilled with ethylene from a balloon. The filled balloon was used to maintain the ethylene atmosphere, while a vigorous reaction with evolution of fumes was observed. This evolution stopped in typically 3 minute. The reaction vessel was cooled to  $-20\text{ }^{\circ}\text{C}$  and (*E*)-nona-1,3-diene (47 mg, 0.38 mmol) in dichloromethane (1 mL) was added under ethylene and the mixture was stirred for 14 h until the completion of reaction monitored by gas chromatography. The ethylene balloon was removed and 0.1 mL of methanol was introduced into the flask and stirring was continued for 5 minutes. The solution was warmed to room temperature and was subsequently passed through a silica plug. The plug was washed with pentane (3 x 10 mL). Concentration and removal of last traces of solvent yielded the product as a colorless oil. Analysis by GC and NMR showed that the product was essentially pure with major isomer (**13a** product with 95% yield and 87% ee). Isomeric compositions were determined by gas chromatography and NMR spectroscopy.

Highest ee for this substrate was obtained using (*R,R*)-DIOP (>95% ee, >95% yield) or (*S,S*)-BDPP (>97% ee, >95% yield) at  $-45\text{ }^{\circ}\text{C}$ .<sup>2</sup>

IF  
10.657

13a using Cl<sub>2</sub>Co(dppb Entry 1, Table 3)

methylsilicone 80 degree, isotherm

21.564

TIMETABLE STOP

Error storing signal to M:SIGNAL .RAW  
ATTEMPTED WRITE PAST END OF FILE

RUN# 948 SEP 11, 1901 14:14:13

| AREA% | RT     | AREA    | TYPE | WIDTH | AREA%    |
|-------|--------|---------|------|-------|----------|
|       | 10.657 | 16423   | VP   | .086  | .22850   |
|       | 21.564 | 7170784 | PB   | .174  | 99.77152 |

SIHRI

IF

13a using Cl<sub>2</sub>Co(dppb) Entry 1, Table 3

IF

(cyclodex-B 60 degree)

20.690

29.185

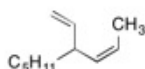

STOP

Closing signal file M:SIGNAL .BNC

RUN# 3884 MAY 6, 2009 01:42:26

SIGNAL FILE: M:SIGNAL.BNC

| AREA% | RT     | AREA  | TYPE | WIDTH | AREA%    |
|-------|--------|-------|------|-------|----------|
|       | 20.690 | 48959 | UU   | .219  | 53.51470 |
|       | 21.644 | 42528 | UU   | .215  | 46.48530 |

START

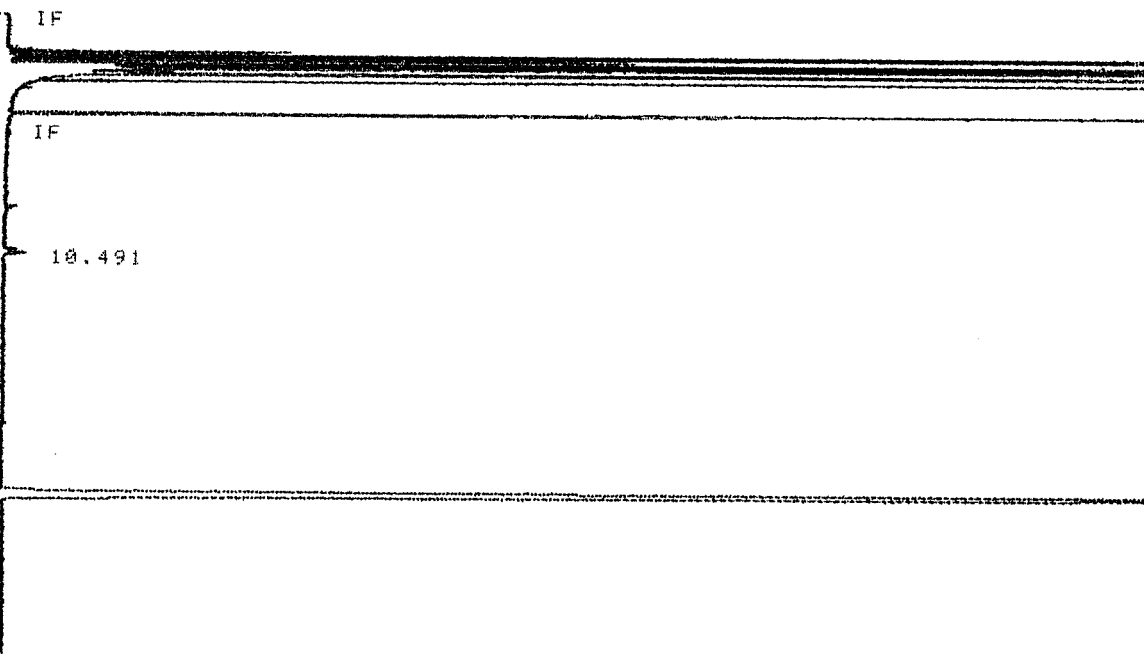

21.221

STOP

Error storing signal to M:SIGNAL .RAW  
ATTEMPTED WRITE PAST END OF FILE

RUN# 835 JUN 24, 1981 11:20:05

AREA%

| RT     | AREA    | TYPE | WIDTH | AREA%     |
|--------|---------|------|-------|-----------|
| 21.221 | 1083970 | PB   | .168  | 100.00000 |

TOTAL AREA=1083970  
MUL FACTOR=1.00000E+00

\*  
\*  
\*  
\*

(Entry 1, Table 5)

(Polydimethylsiloxane, 80 °C)

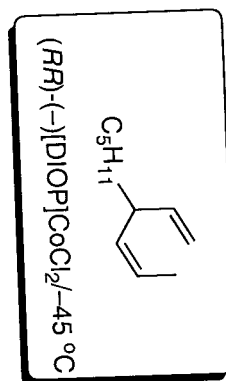

*Overlump = 80 C / 51 ul/min  
RIS-2752*

RX1-2-152 / 5% (-)-DIOP/CoCl<sub>2</sub> / Isotherm 60°C  
(-45°C)

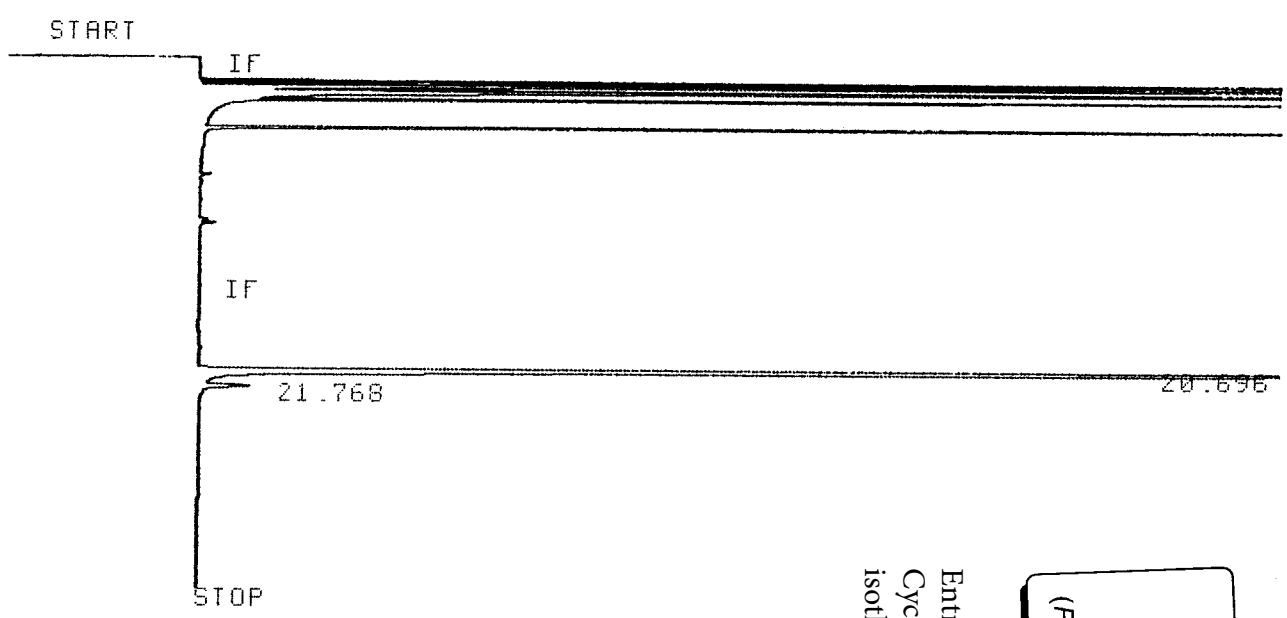

Entry1, Tble 5  
Cyclodex-B, 60 degree  
isotherm)

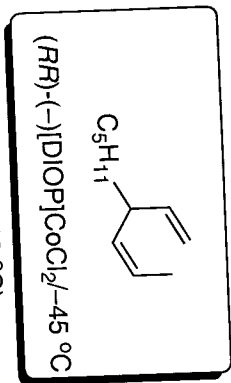

Closing signal file M:SIGNAL .BNC

RUN# 3919 MAY 16, 2009 00:35:45

SIGNAL FILE: M:SIGNAL.BNC  
AREA%

| RT     | AREA  | TYPE | WIDTH | AREA%    |
|--------|-------|------|-------|----------|
| 20.696 | 75830 | BB   | .203  | 98.01462 |
| 21.768 | 1536  | BP   | .179  | 1.98537  |

TOTAL AREA= 77366  
MUL FACTOR=1.0000E+00

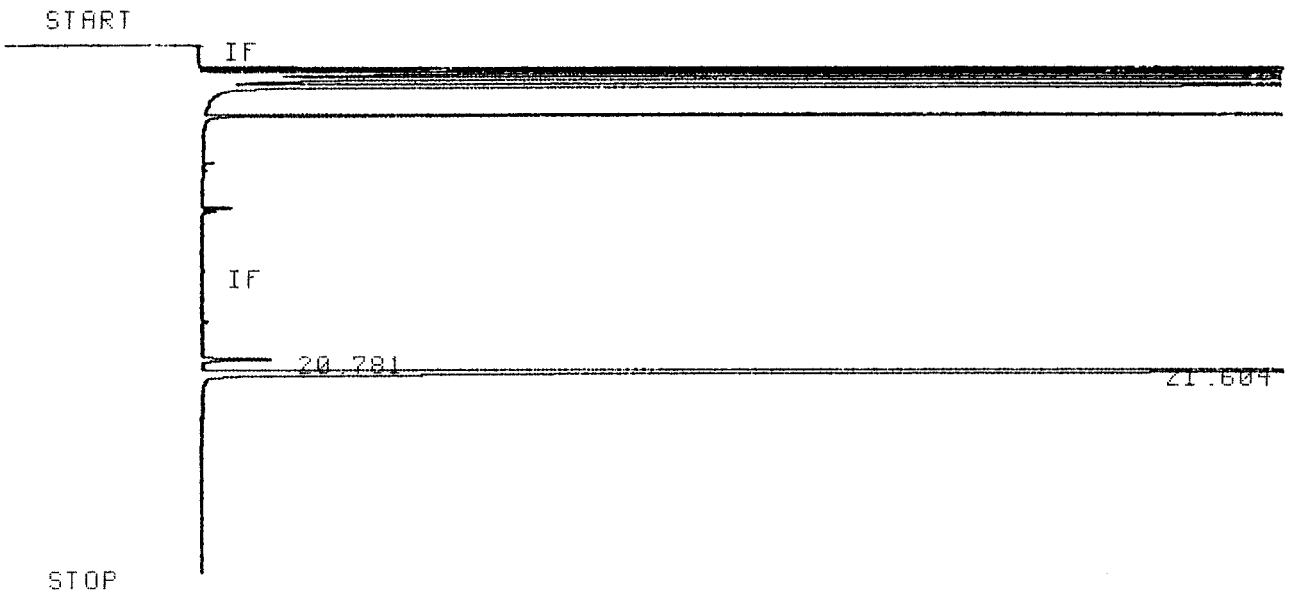

Closing signal file M:SIGNAL .BNC

RUN# 3910                    MAY 13, 2009 02:51:50

SIGNAL FILE: M:SIGNAL.BNC

AREA%

| RT     | AREA  | TYPE | WIDTH | AREA%    |
|--------|-------|------|-------|----------|
| 20.781 | 2449  | UU   | .167  | 3.31879  |
| 21.604 | 71343 | PU   | .206  | 96.68122 |

TOTAL AREA= 73792  
 MUL FACTOR=1.00000E+00

(Cyclodex-B, 60 °C)

(S)-(+)[DIOP]CoCl<sub>2</sub>/-45 °C

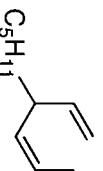

START

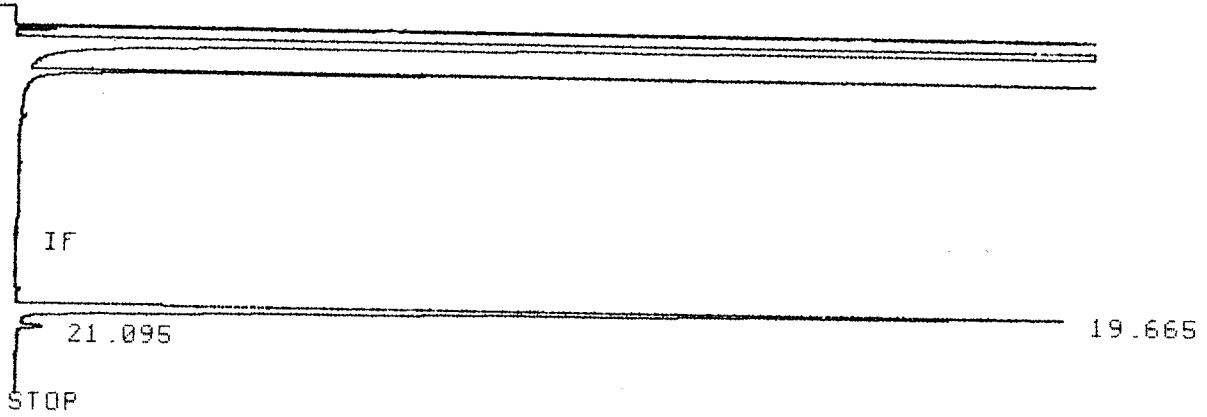

Closing signal file M:SIGNAL .BNC

RUN# 4007                    AUG 3, 2009 00:35:24

SIGNAL FILE: M:SIGNAL.BNC

| RT     | AREA   | TYPE | WIDTH | AREA%    |
|--------|--------|------|-------|----------|
| 19.665 | 592287 | BB   | .335  | 98.56893 |
| 21.095 | 8599   | BB   | .219  | 1.43105  |

TOTAL AREA= 600886  
MUL FACTOR=1.0000E+00

13a using (S,S)-(BDPP) Entry 2, Table 5)

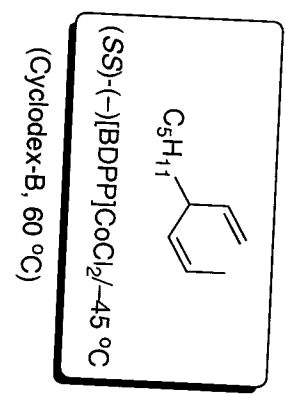

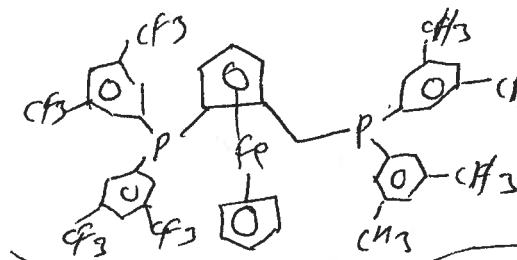

YT-03-281

OT 70°C, cyclodex, Isothermal.

(1 mol% catalyst)

RUN # 4772 FEB 17, 2012 20:24:37

PART

IF

IF

IF

25.878

GC (Cyclodex-B, 70 degree) of Compound **13a** (HV using  
Cl<sub>2</sub>Co(Josiphos Ligand **L18**, Entry 4, Table 5)

47.225

STOP

Using signal file M:SIGNAL .BNC

RUN# 4772 FEB 17, 2012 20:24:37

SIGNAL FILE: M:SIGNAL.BNC

AREA

| RT     | AREA   | TYPE | WIDTH | AREA%    |
|--------|--------|------|-------|----------|
| 14.375 | 2058   | BP   | .113  | 1.20836  |
| 23.720 | 151804 | BB   | .204  | 89.13184 |
| 25.878 | 10506  | BB   | .206  | 6.16860  |
| 47.225 | 5946   | BB   | .349  | 3.49120  |

TOTAL AREA= 170314

SCALE FACTOR=1.0000E+00

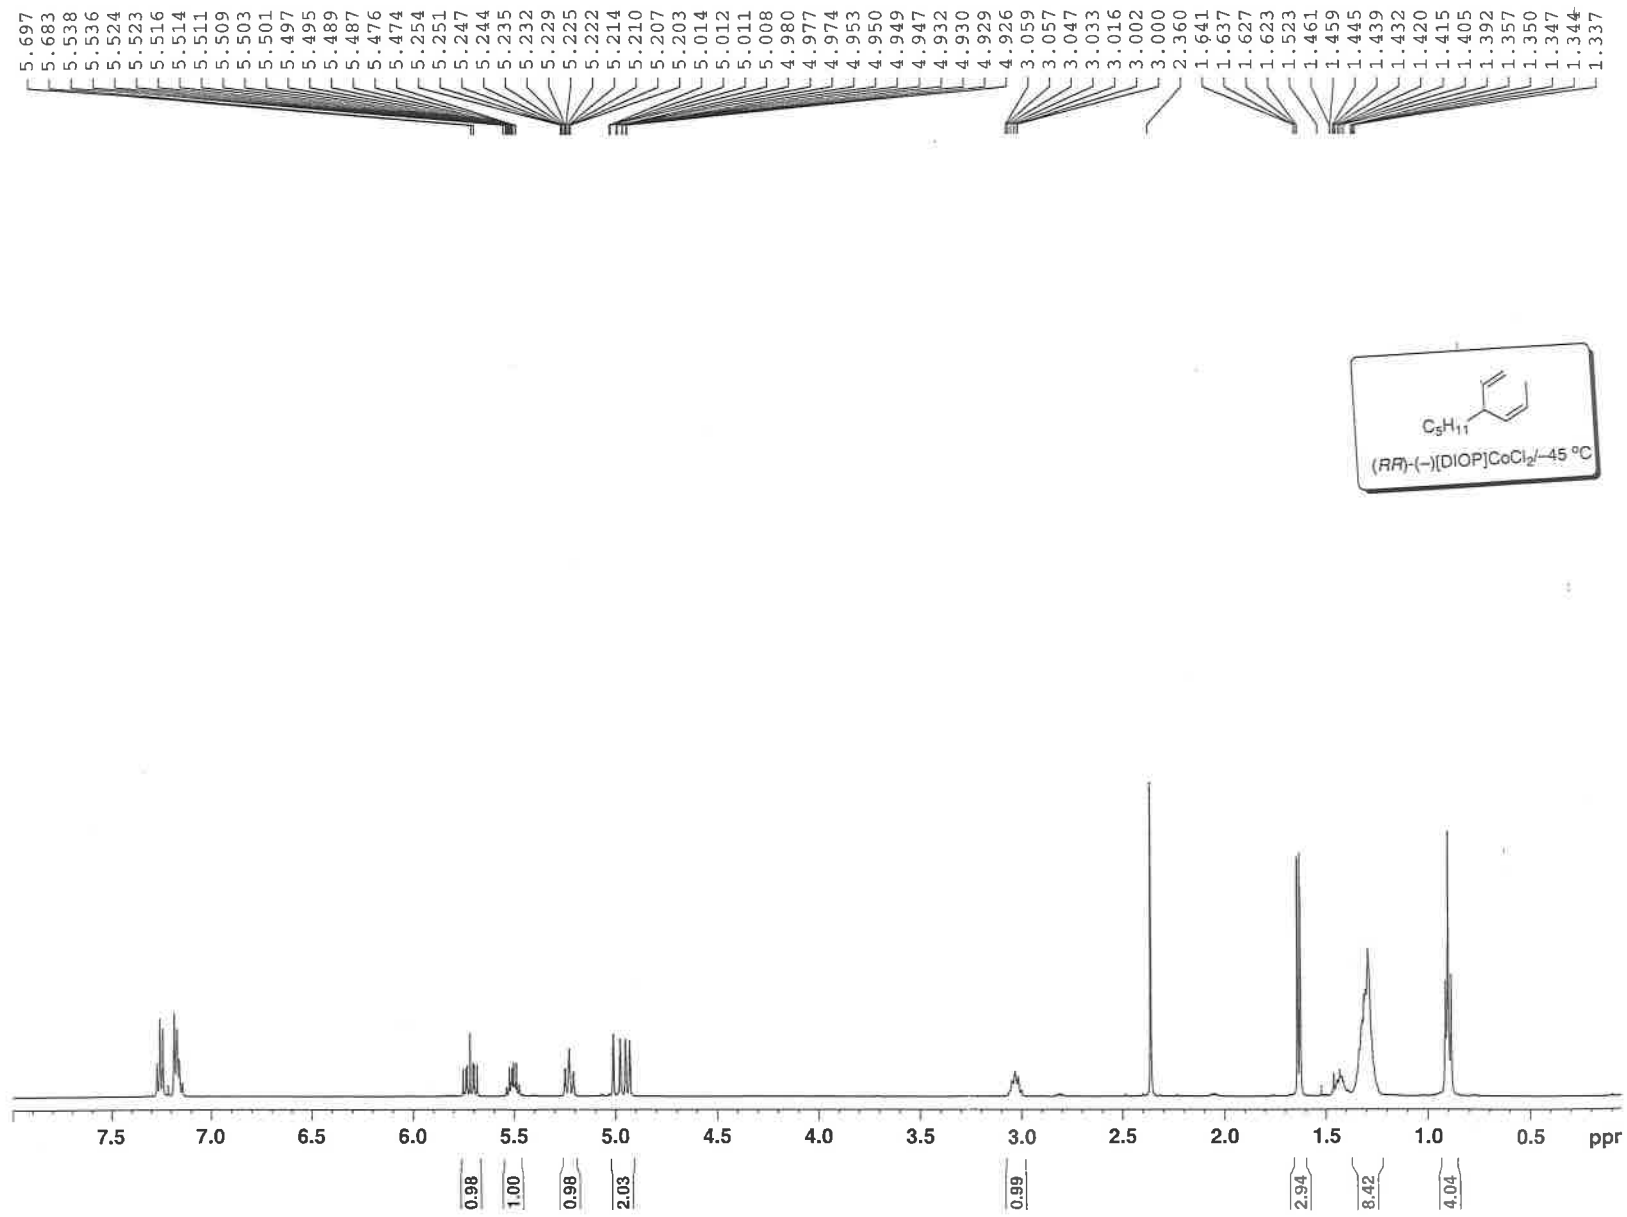



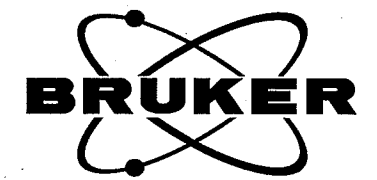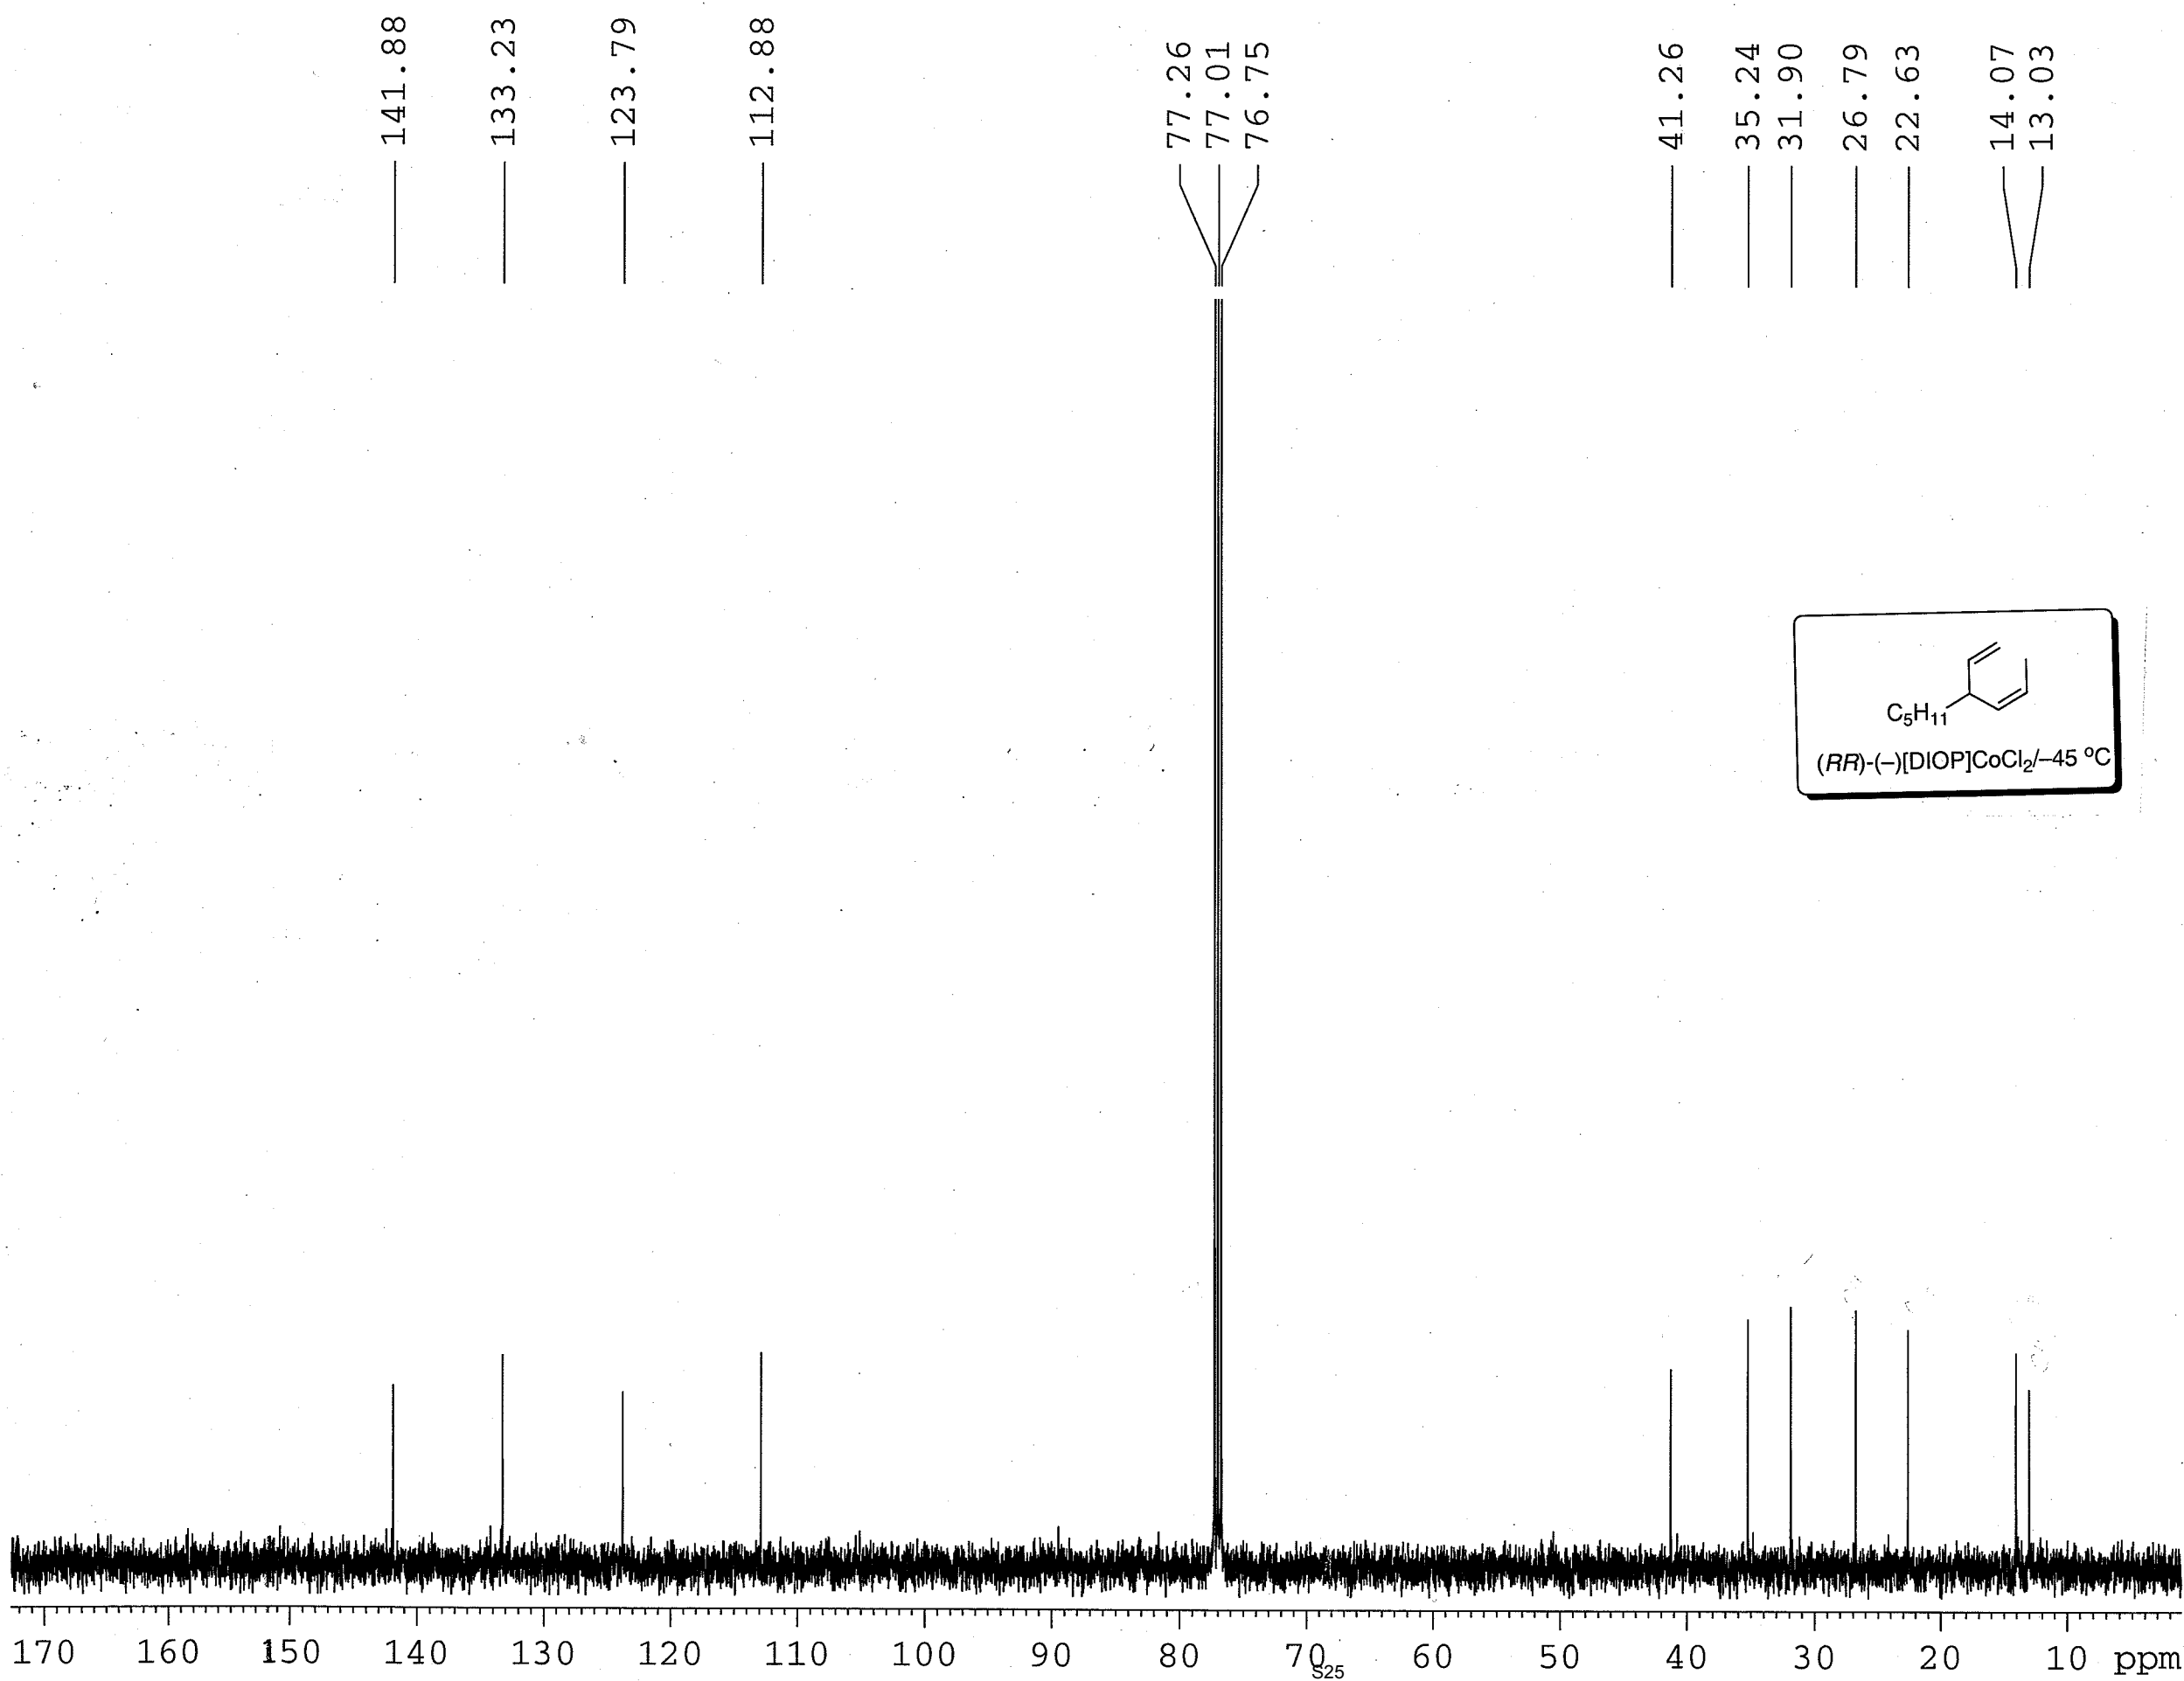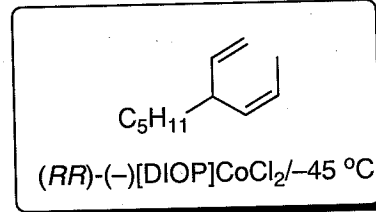

Current Data Parameters  
 NAME RKS-2-152 again carbon  
 EXPNO 383  
 PROCNO 1

F2 - Acquisition Parameters  
 Date\_ 20091224  
 Time 13.29  
 INSTRUM spect  
 PROBHD 5 mm Multinucl  
 PULPROG zgpg30  
 TD 65536  
 SOLVENT CDC13  
 NS 50  
 DS 4  
 SWH 30030.029 Hz  
 FIDRES 0.458222 Hz  
 AQ 1.0912244 sec  
 RG 3251  
 DW 16.650 usec  
 DE 12.00 usec  
 TE 300.2 K  
 D1 2.0000000 sec  
 d11 0.0300000 sec  
 DELTA 1.89999998 sec  
 MCREST 0.0000000 sec  
 MCWRK 0.01500000 sec

==== CHANNEL f1 =====  
 NUC1 13C  
 P1 12.00 usec  
 PL1 3.00 dB  
 SFO1 125.7427020 MHz

==== CHANNEL f2 =====  
 CPDPRG2 waltz16  
 NUC2 1H  
 PCPD2 100.00 usec  
 PL2 -1.00 dB  
 PL12 15.59 dB  
 PL13 22.50 dB  
 SFO2 500.0220001 MHz

F2 - Processing parameters  
 SI 32768  
 SF 125.7301290 MHz  
 WDW EM  
 SSB 0  
 LB 1.00 Hz  
 GB 0  
 PC 1.00

## Hydrovinylation of (*E*)-deca-1,3-diene (12b)

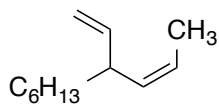

**Hydrovinylation of (*E*)-deca-1,3-diene using (*R,R*)[DIOP]CoCl<sub>2</sub> (Table 5, Entry 5).** To an oven dried round bottom flask with a sidearm, was added (*RR*)[DIOP]CoCl<sub>2</sub> (3 mg, 0.0028 mmol) and dichloromethane (0.5 mL) was added. Trimethylaluminium solution (2 M) (0.05 mL, 0.008 mmol) was

added to the solution and the color changed from deep blue to red brown with the formation of white fumes. After 2 to 3 minutes, the reaction vessel was carefully evacuated and then refilled with ethylene balloon. The reaction vessel was kept at -45 °C and (*E*)-deca-1,3-diene (43 mg, 0.28 mmol), was added via syringe under ethylene and the mixture was stirred for 6 h. The ethylene balloon was removed and 0.1 mL methanol was added into the flask. The reaction solution was diluted with pentane (5 mL) and warmed to room temperature and subsequently passed through a silica plug. The plug was washed with pentane (3 x 6 mL). Removal of the solvent yielded the product as colorless oil. GC showed 97% (*Z*)-1,4-product and 3% 1,4-linear dimerized product.

An authentic sample of the racemic compound was prepared by similar procedure (Table 3, Entry 2) using corresponding achiral complex [(dppb)CoCl<sub>2</sub>] at the prescribed temperature.

<sup>1</sup>H NMR (CDCl<sub>3</sub>): δ 0.891 (t, J = 7 Hz, 3 H, H<sup>10</sup>), 1.23-1.40 (m, 9 H), 1.38-1.47 (m, 1 H), 1.23-1.47 total 10 H, 1.628 (dd, J = 7, 2 Hz, 3 H, H<sup>1</sup>), 3.027 (m, 1 H, H<sup>4</sup>), 4.935 (dm, J = 10 Hz, H<sup>12</sup>), 4.987 (ddd, J = 17.5 Hz, m, 1 H, H<sup>13</sup>), 5.222 (app t m, 10.5 Hz, H<sup>3</sup>), 5.502 (dqm, 11.5 Hz, 6.5 Hz, 1 Hz, H<sup>2</sup>), 5.714 (ddd, 17 Hz, 10 Hz, 7 Hz, 1H, H<sup>11</sup>). [toluene @ 2.364]. Also seen: (t, J = 6.5 Hz) 0.221 up-field from C<sub>sp3</sub>-CH (3.027) ~ 2% (bis-allylic CH<sub>2</sub>).

<sup>13</sup>C (CDCl<sub>3</sub>) 13.01, 14.07, 22.66, 27.10, 29.34, 31.87, 35.30, 41.26, 112.86, 123.77, 133.23, 141.86.

Mass spectrum: m/z = 167.1 (calculated for [M+H]<sup>+</sup>, M = C<sub>12</sub>H<sub>23</sub> 167.1)

Product from (*RR*)-(-)-DIOP [ $\alpha$ ]<sub>D</sub><sup>25</sup> = -18.6 (hexane, c 1.25)

Gas chromatography: (Polydimethylsiloxane) conditions: 90 °C isotherm, retention time (min): R<sub>T</sub> = 27.40. CSP GC (Cyclodex) conditions: 60 °C isotherm, R<sub>T</sub> = 35.94 min. (*S*, 97.7%), 38.07 (*R*, 2.3%).

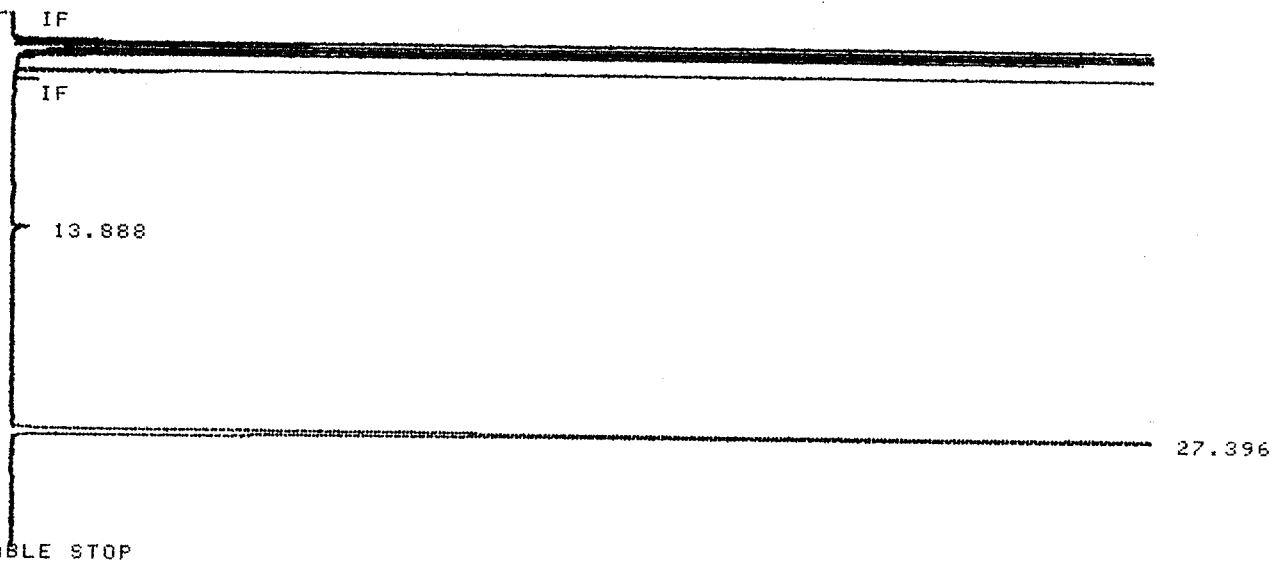

Error storing signal to M:SIGNAL .RAW  
ATTEMPTED WRITE PAST END OF FILE

RUN# 893 AUG 5, 1901 13:19:05

AREA%

| RT     | AREA    | TYPE | WIDTH | AREA%    |
|--------|---------|------|-------|----------|
| 13.888 | 11686   | PV   | .116  | .69185   |
| 27.396 | 1677486 | PP   | .214  | 99.30813 |

TOTAL AREA=1689092  
MUL FACTOR=1.0000E+00

13b using (RR)-DIOP -45 degree  
methylsilicone column  
90 degree isotherm, Entry 5, Table 5

START

IF

13b using (RR)-DIOP -45 degree  
cyclodex-B, 60 degree isotherm, column  
90 degree isotherm, Entry 5, Table 5

35.945

38.087

END OF SIGNAL

Closing signal file M:SIGNAL .BNA

RUN# 3963 JUN 27, 2009 22:45:12

SIGNAL FILE: M:SIGNAL.BNA

AREA%

| RT     | AREA   | TYPE | WIDTH | AREA%    |
|--------|--------|------|-------|----------|
| 35.945 | 167914 | BU   | .472  | 97.69712 |
| 38.087 | 3958   | BU   | .402  | 2.30288  |

TOTAL AREA= 171872

MUL FACTOR=1.0000E+00

1.179  
 1.184  
 1.193  
 1.199  
 1.282  
 1.352  
 1.368  
 1.384  
 1.416  
 1.427  
 1.454  
 1.509  
 1.513  
 1.619  
 1.623  
 1.633  
 1.636  
 1.659  
 1.662  
 1.672  
 1.676  
 1.680  
 1.683  
 2.039  
 2.053  
 2.364  
 2.806  
 2.995  
 3.011  
 3.027  
 3.041  
 4.921  
 4.924  
 4.926  
 4.945  
 4.947  
 4.967  
 4.970  
 4.973  
 4.988  
 4.990  
 5.001  
 5.005  
 5.008  
 5.200  
 5.203  
 5.219  
 5.222  
 5.225  
 5.237  
 5.240  
 5.244  
 5.471  
 5.484  
 5.490  
 5.492  
 5.498  
 5.504  
 5.506  
 5.511  
 5.518  
 5.520  
 5.533  
 5.680  
 5.694  
 5.700  
 5.714  
 5.728  
 5.734  
 5.748  
 7.188  
 7.260

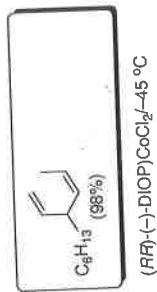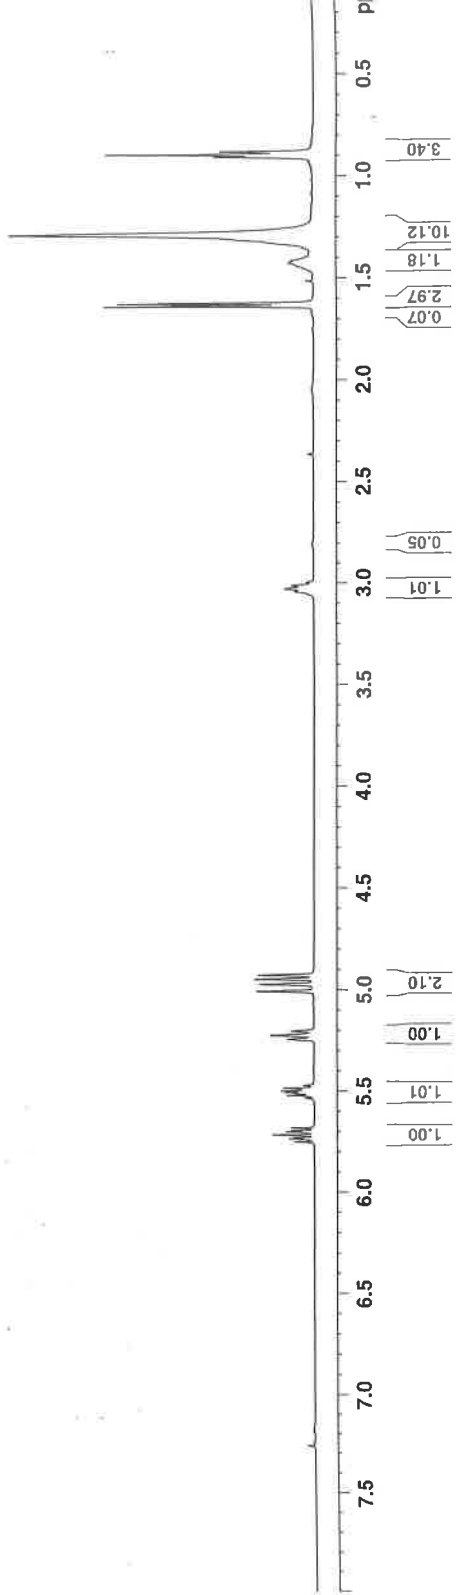

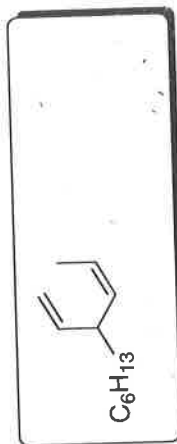

(R,R)-(-)-DIOP)CoCl<sub>2</sub>/-45 °C

- 41.26
- 35.30
- 31.87
- 29.34
- 27.10
- 22.66
- 14.07
- 13.01

- 77.25
- 77.00
- 76.74

- 141.86
- 133.23
- 123.77
- 112.86

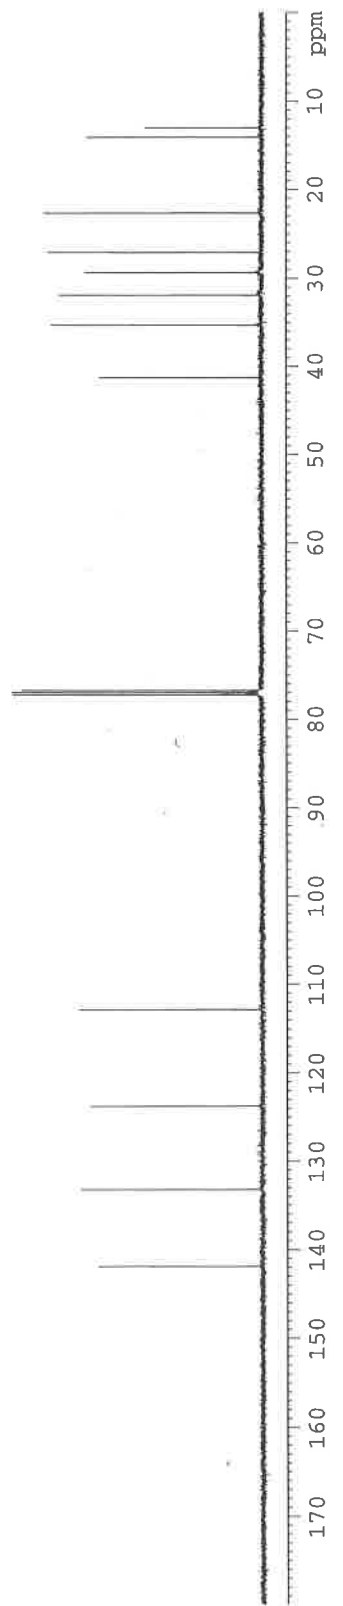

## Hydrovinylation of (*E*)-undeca-1,3-diene (**12c**)

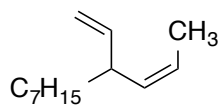

**Hydrovinylation of (*E*)-undeca-1,3-diene using 1 mol % [L18 Josiphos-2]CoCl<sub>2</sub> Loading (Table 5, Entry 7).** To an oven dried round bottom flask with a sidearm, was added [(L18)CoCl<sub>2</sub>] (3 mg, 0.0028 mmol) and dichloromethane (0.5 mL) was added. Trimethylaluminium solution (2 M) (0.05 mL, 0.008 mmol) was added to the solution and the color changed from deep blue to red brown with the formation of white fumes. After 2 to 3 minutes, the reaction vessel was carefully evacuated and then refilled with ethylene balloon. The reaction vessel was kept at -20 °C and (*E*)-undeca-1,3-diene (43 mg, 0.28 mmol), was added via syringe under ethylene and the mixture was stirred for 7 h. The ethylene balloon was removed and 0.1 mL methanol was added into the flask. The reaction solution was diluted with pentane (5 mL) and warmed to room temperature and subsequently passed through a silica plug. The plug was washed with pentane (3 x 6 mL). Removal of the solvent yielded the product as colorless oil. GC showed 97% (*Z*)-1,4-product and 3% 1,4-linear dimerized product.

Gas Chromatography (**13c**): CSP GC (Cyclodex-B, OT 100 °C/ isothermal, H<sub>2</sub> carrier gas). R<sub>T</sub> for product = 50.0 min and 51.2 min (enantioselectivity 87 %ee).

[(*R,R*)-DIOP]CoCl<sub>2</sub> at -45 °C (6 h) gave the highest selectivity for this substrate (>95 %ee).<sup>2</sup>

13c using (dppb)CoCl<sub>2</sub> (Table 3, entry 3)  
methylsilicone column Oven temp 110 degrees

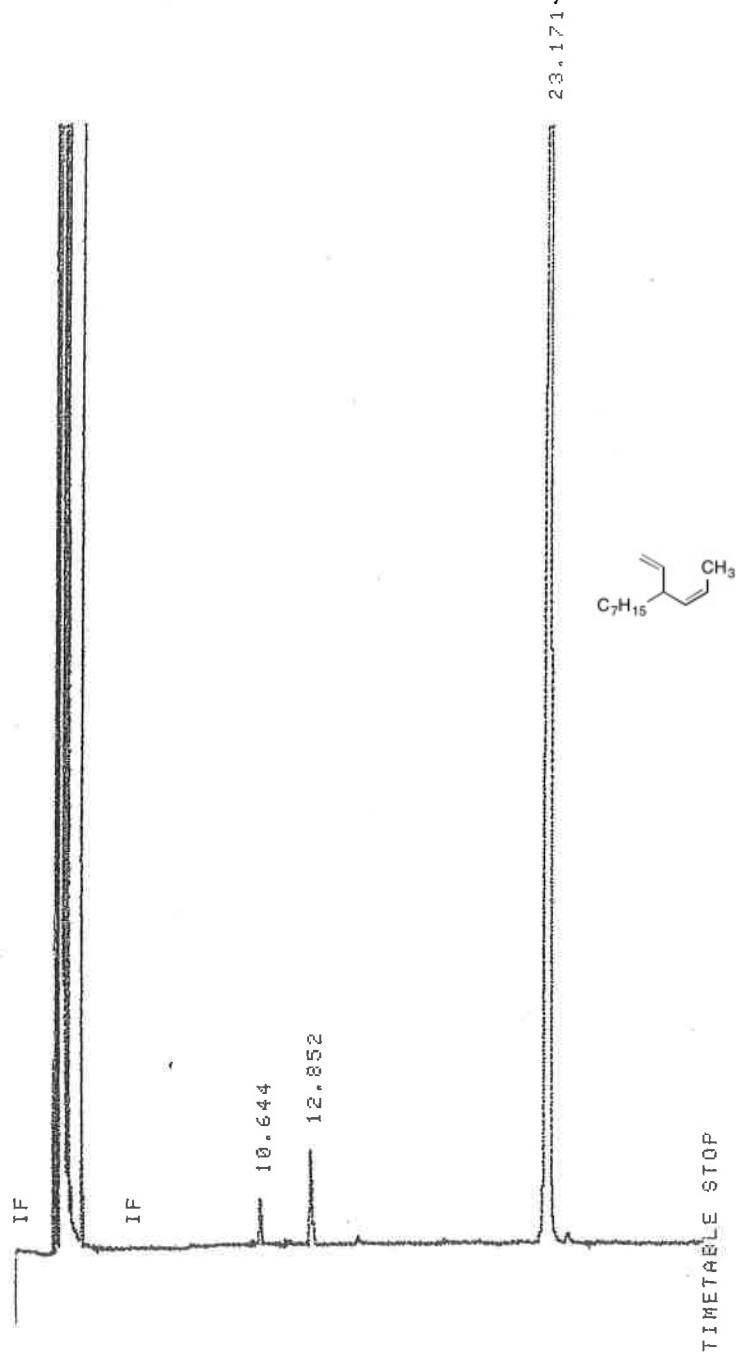

Error storing signal to M:SIGNAL .RAW  
ATTEMPTED WRITE PAST END OF FILE

RUN# 870 JUL 11. 1901 14:02:51

| AREA# | RT     | AREA    | TYPE | WIDTH | AREA#    |
|-------|--------|---------|------|-------|----------|
|       | 10.644 | 14868   | PP   | .092  | .57381   |
|       | 12.852 | 30605   | PV   | .095  | 1.18116  |
|       | 23.171 | 2545624 | BV   | .179  | 98.24502 |

TOTAL AREA=2591098  
MUL FACTOR=1.0000E+00



\*AN  
RUN # 4031      AUG 17, 2009    01:42:58  
START

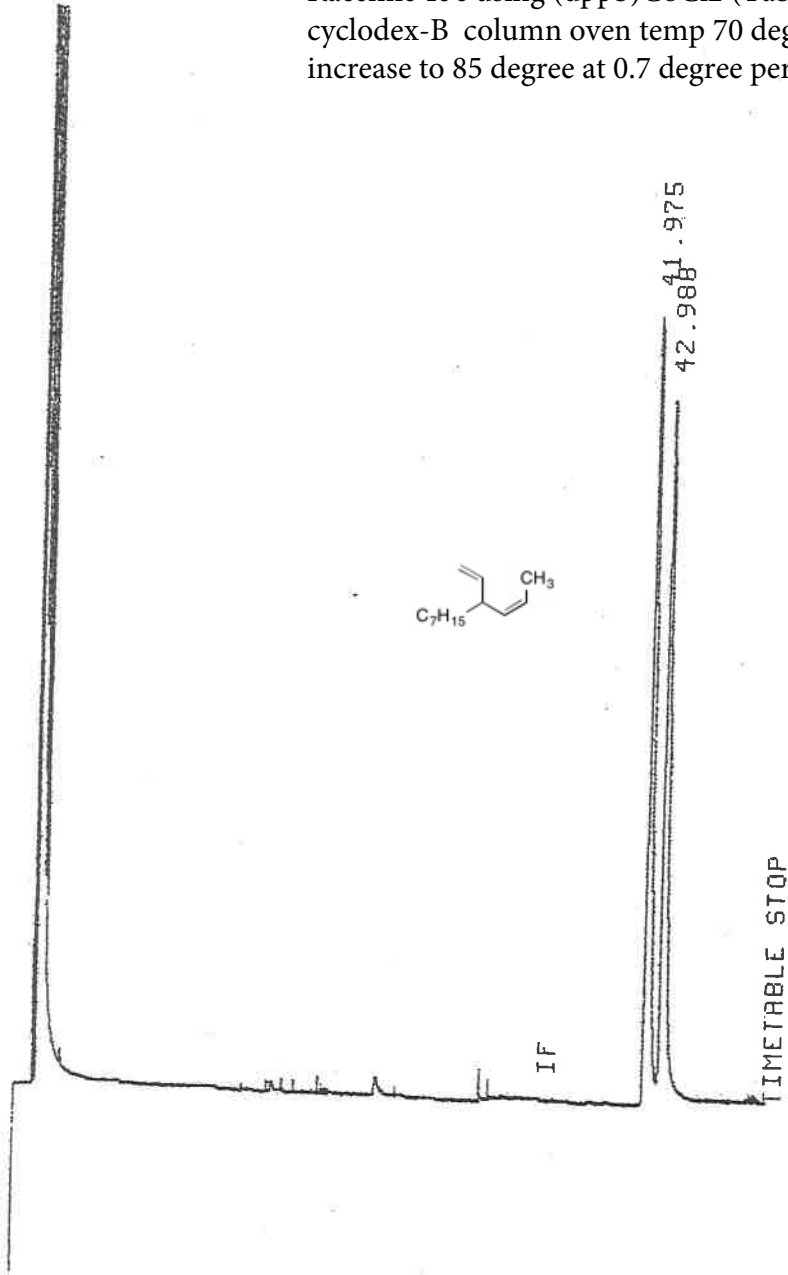

Racemic 13c using (dppb)CoCl<sub>2</sub> (Table 3, entry 3)  
cyclodex-B column oven temp 70 degrees/30 min,  
increase to 85 degree at 0.7 degree per minute

Closing signal file M:SIGNAL .BNA

RUN# 4031      AUG 17, 2009    01:42:58

SIGNAL FILE: M:SIGNAL.BNA  
AREA%

| RT     | AREA   | TYPE | WIDTH | AREA%    |
|--------|--------|------|-------|----------|
| 41.975 | 105918 | PV   | .317  | 50.06784 |
| 42.988 | 105631 | VB   | .356  | 49.93218 |

TOTAL AREA= 211549  
MUL FACTOR=1.0000E+00

13c using (RR)-DIOPCoCl2 at -45 degree (entry 6, Table 5) cyclodex-B column oven  
temp 70 degrees/30 min, increase to 85 degree at 0.7 degree per minute

IF

IF00

41.691

STOP

Closing signal file M:SIGNAL .BNC

RUN# 3956 JUN 26, 2009 23:38:42

SIGNAL FILE: M:SIGNAL.BNC

AREA%

| RT     | AREA  | TYPE | WIDTH | AREA%    |
|--------|-------|------|-------|----------|
| 41.691 | 53419 | BB   | .303  | 97.72960 |
| 42.766 | 1241  | PP   | .255  | 2.27040  |

TOTAL AREA= 54660

MUL FACTOR=1.0000E+00

*95.45% ee*

GC (Cyclodex-B, 100 degree) of Compound **13c** (HV using Josiphos ligand **L18**) (entry 7, Table 5) 87% ee

YT-03-10  
OT 100%, cyclodex B, 180  
C7H15

\* RUN # 4785 FEB 27, 2012 21:40:34

START

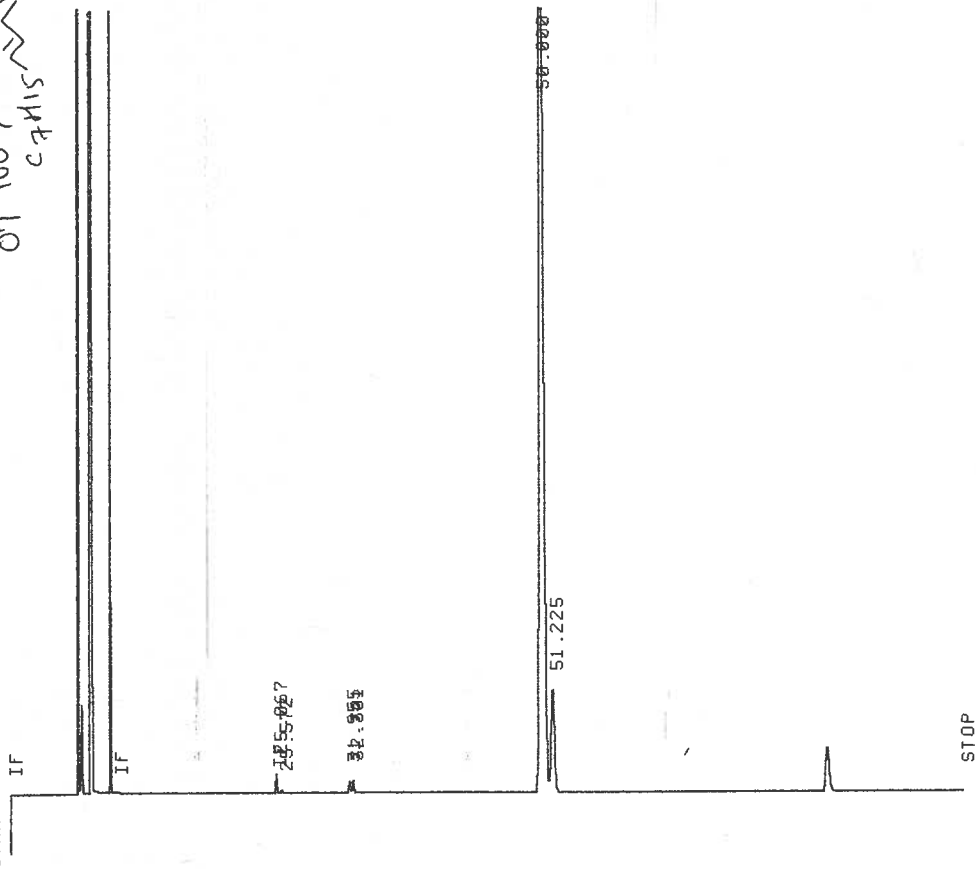

Closing signal file M:SIGNAL.BNC

RUN# 4785 FEB 27, 2012 21:40:34

SIGNAL FILE: M:SIGNAL.BNC

| AREA% | RT     | AREA    | TYPE | WIDTH | AREA%    |
|-------|--------|---------|------|-------|----------|
|       | 25.067 | 6762    | UP   | .133  | .45712   |
|       | 25.572 | 1646    | PB   | .136  | .11127   |
|       | 31.955 | 5030    | BU   | .164  | .34004   |
|       | 32.301 | 5982    | UB   | .173  | .40439   |
|       | 50.000 | 1321737 | PU   | .383  | 89.35142 |
|       | 51.225 | 93350   | UB   | .370  | 6.31060  |
|       | 77.168 | 44750   | BB   | .408  | 3.02517  |

TOTAL AREA=1479257  
MUL FACTOR=1.0000E+00

\* RUN # 4789 MAR 9, 2012 19:25:59

START

IF

*YT-03-44, cyclodex,  
OT 100C*

IF

*C7H15*

IF

24.815

31.592 *SM*

50.743 49.955

*GC (Cyclodex-B, 100 degree) of Compound 13c Using  
Josiphos Ligand L17*

65.187

76.467

*1,4 linear*

STOP

Closing signal file M:SIGNAL .BNC

RUN# 4789 MAR 9, 2012 19:25:59

SIGNAL FILE: M:SIGNAL.BNC

AREA%

| RT     | AREA   | TYPE | WIDTH | AREA%    |
|--------|--------|------|-------|----------|
| 24.815 | 2064   | PB   | .128  | .77326   |
| 31.592 | 57986  | UU   | .168  | 21.72403 |
| 49.955 | 103251 | UU   | .257  | 38.68224 |
| 50.743 | 82991  | UB   | .275  | 31.09197 |
| 65.187 | 4500   | BB   | .330  | 1.68589  |
| 76.467 | 16129  | PB   | .395  | 6.04261  |

TOTAL AREA= 266921

MUL FACTOR=1.0000E+00

RKS-2-168

$C_7H_{15}$  

7.260  
5.744  
5.730  
5.724  
5.710  
5.696  
5.689  
5.675  
5.515  
5.513  
5.507  
5.501  
5.500  
5.493  
5.488  
5.480  
5.478  
5.466  
5.239  
5.235  
5.220  
5.217  
5.214  
5.199  
5.195  
5.002  
5.000  
4.996  
4.968  
4.965  
4.962  
4.942  
4.940  
4.937  
4.922  
4.920  
4.916  
4.916  
3.034  
3.021  
3.005  
1.631  
1.628  
1.618  
1.614  
1.445  
1.419  
1.407  
1.304  
1.272  
0.899  
0.893  
0.885  
0.880  
0.871

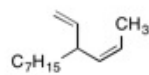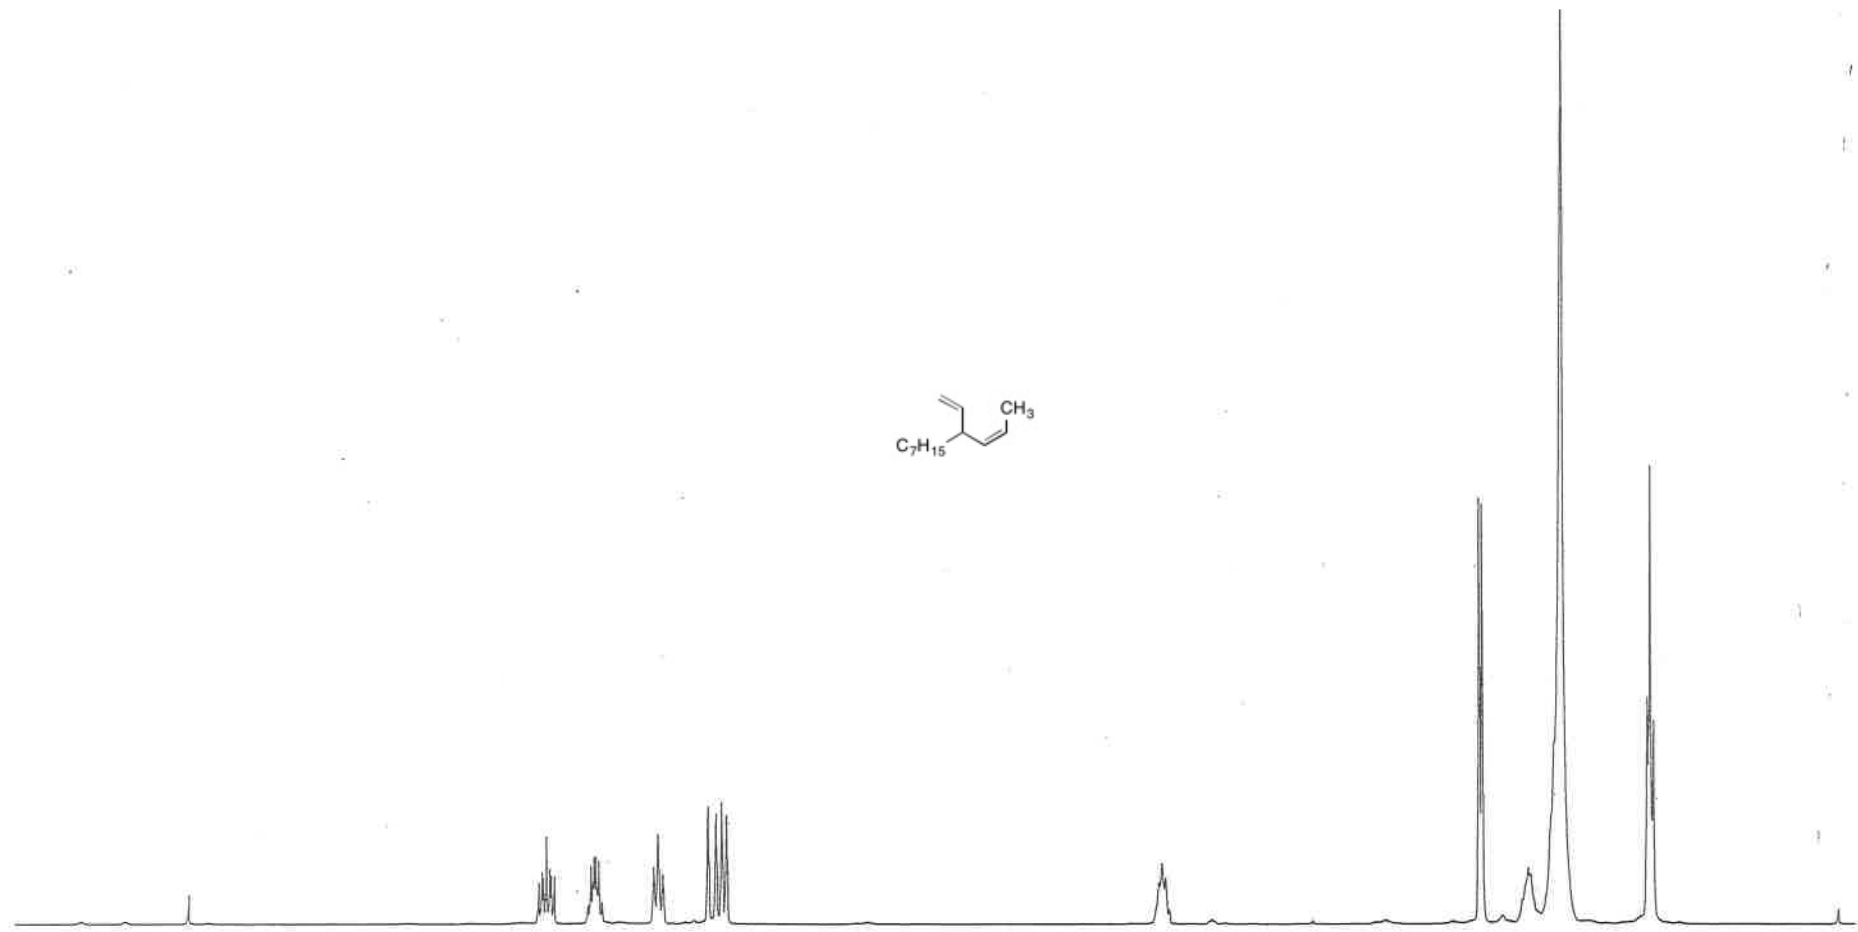

7.5 7.0 6.5 6.0 5.5 5.0 4.5 4.0 3.5 3.0 2.5 2.0 1.5 1.0 0.5 ppm

1.00  
1.01  
1.00  
2.08  
1.01  
0.05  
3.03  
1.25  
12.35  
3.55

41.26  
35.29  
31.89  
29.65  
29.30  
27.14  
22.67  
14.08  
13.02

77.26  
77.00  
76.75

141.88  
133.23  
123.78  
112.87

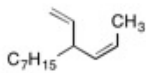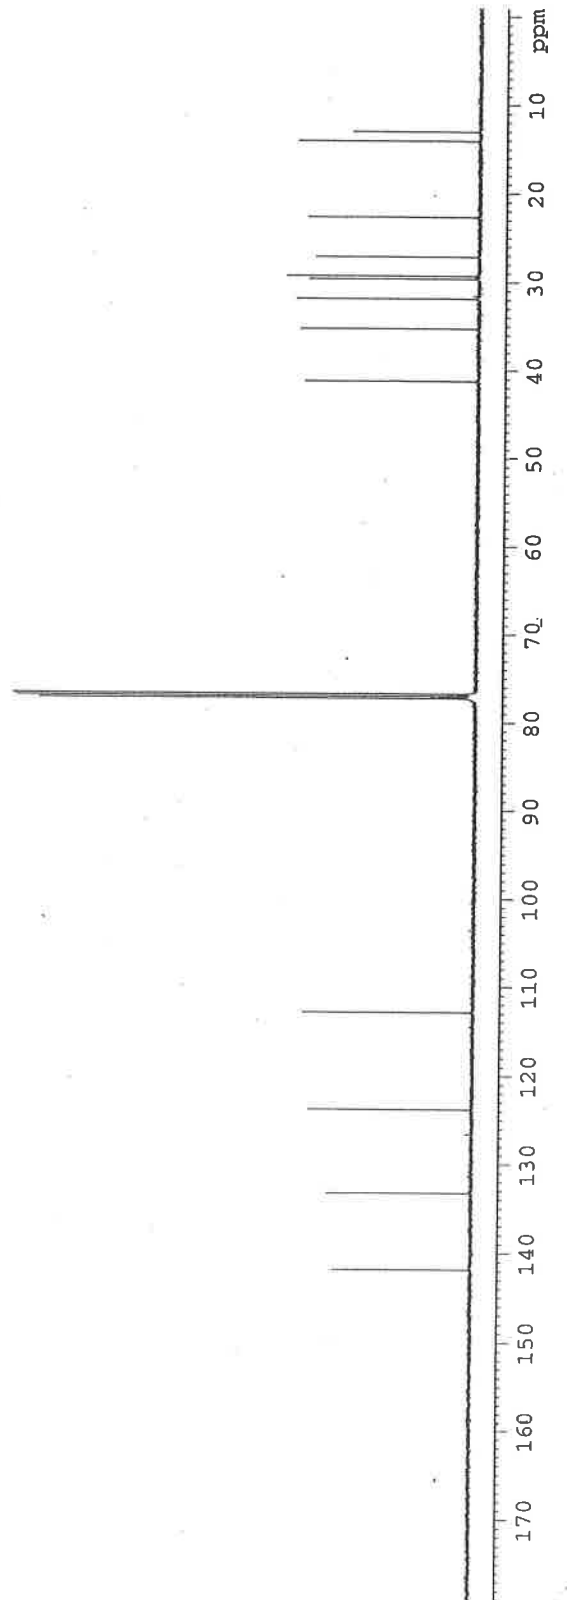

## Hydrovinylation of (*E/Z*)-dodeca-1,3-diene (**12d**)

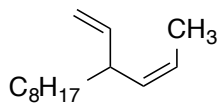

**Hydrovinylation of (*E/Z*)-dodeca-1,3-diene using [DPPB]CoCl<sub>2</sub> (Table 3, Entry 5).** To an oven dried round bottom flask with a sidearm, was added DPPBCoCl<sub>2</sub> (21 mg, 0.038 mmol) and methylaluminoxane (44 mg, 0.76 mmol) under argon. The color of the solution changed from deep blue to red

brown with the formation of white fumes over the addition of dichloromethane solvent (1 mL). After 2 to 3 minutes, the reaction vessel was carefully evacuated and then refilled with ethylene balloon. The reaction vessel was kept at -10 °C and (*E/Z*)-dodeca-1,3-diene (63 mg, 0.38 mmol), mixture of *E:Z* in the ratio of 54:46 via GC, was added via syringe under ethylene and the mixture was stirred for 8 h. The ethylene balloon was removed and 0.1 mL methanol was added into the flask. The reaction solution was diluted with pentane (2 mL) and warmed to room temperature and subsequently passed through a silica plug. The plug was washed with pentane (3 x 5 mL). Removal of the solvent yielded the product as colorless oil (61 mg, 82%). GC and NMR analysis showed that the product was essentially pure. <sup>1</sup>H NMR (CDCl<sub>3</sub>, 400 MHz): 0.836 (t, J = 7 Hz, 3 H), 1.25 – 1.43 (m, 14 H), 1.60 (dd, J = 7, 2 Hz, 3 H), 2.96 – 3.03 (m, 1 H), 4.89 - 4.99 (m, 2 H), 5.16 – 5.23 (m, 1 H), 5.43 - 5.51 (m, 1 H), 5.69 (ddd, J = 17, 10, 7 Hz, 1 H). <sup>13</sup>C NMR (CDCl<sub>3</sub>, 125.02 MHz): 13.26, 14.33, 22.91, 27.37, 29.56, 29.83, 29.92, 32.14, 35.52, 41.49, 113.10, 124.01, 133.46, 142.10.

Gas Chromatography (**13d**): CSP GC (Cyclosil, OT 90 °C/ isothermal, H<sub>2</sub> carrier gas): starting material R<sub>T</sub> = 31.19 min. for *E*-diene and 31.81 for *Z* diene. R<sub>T</sub> for product = 51.74 min and 54.82 min (racemic). Cyclodex-B 65 °C/30 min increase 2 °C per min to 80 °C (He): R<sub>T</sub> for product = 96.65 min and 99.14 min (racemic).

**Hydrovinylation of (*E/Z*)-dodeca-1,3-diene using (*S,S*)[DIOP]CoCl<sub>2</sub> (Table 5, Entry 10):** To an oven-dried round-bottom flask with a sidearm, was added (*SS*)-[DIOP]CoCl<sub>2</sub> (20 mg, 0.032 mmol) under argon and it was dissolved in a degassed dichloromethane (1 mL) at room temperature. Trimethylaluminum solution (2M) in toluene (0.08 mL, 0.16 mmol) was added dropwise as color of the solution changed from deep blue to red-brown with the formation of white fumes over the solution. When all the fumes disappeared, the reaction vessel was carefully evacuated and then refilled with ethylene from a balloon, a vigorous reaction with evolution of fumes was observed. This evolution stopped in typically within 4 minutes. The reaction vessel was cooled to -45 °C and (*E/Z*)-dodeca-1,3-diene (53 mg, 0.32 mmol, *E:Z* = 54:46) was added under ethylene and the mixture was stirred for 1 h until the completion of the reaction monitored by gas chromatography. The ethylene balloon was removed and 0.1 mL of methanol was introduced into the flask and stirring was continued for 5 minutes. The solution was warmed to room temperature and was subsequently passed through a silica plug. The plug was washed with pentane (3 X 10 mL). Pentane was removed and product was separated as a colorless oil as a major product 1,4-*Z* hydrovinylation product, **13d** (53% yield) with 74% ee. Isomeric compositions were determined by gas chromatography and NMR spectroscopy. <sup>1</sup>H NMR (CDCl<sub>3</sub>, 400 MHz): 0.836 (t, J = 7 Hz, 3 H), 1.25 – 1.43 (m, 14 H), 1.60 (dd, J = 7, 2 Hz, 3 H), 2.96 – 3.03 (m, 1 H), 4.89 - 4.99 (m, 2 H), 5.16 – 5.23 (m, 1 H), 5.43 - 5.51 (m, 1 H), 5.69 (ddd, J = 17, 10, 7 Hz, 1 H). <sup>13</sup>C NMR (CDCl<sub>3</sub>, 125.02 MHz): 13.26, 14.33, 22.91, 27.37, 29.56, 29.83, 29.92, 32.14, 35.52, 41.49, 113.10, 124.01, 133.46, 142.10.

Hydrovinylation of (*E*)-dodeca-1,3-diene using (*S,S*)[DIOP]CoCl<sub>2</sub> at -45 °C (6 h) gave the highest ee for this substrate (>96 %ee, Table 5, Entry 8).<sup>2</sup>

IF

IF

13d using (dppb)CoCl2 (entry 4, Table 3)  
methylsilicone 130 degree isotherm

11.540

TIMETABLE STOP

Error storing signal to M:SIGNAL .BNA  
ATTEMPTED WRITE PAST END OF FILE

RUN# 861 JUL 9, 1981 16:15:36

AREA%

| RT     | AREA    | TYPE | WIDTH | AREA%     |
|--------|---------|------|-------|-----------|
| 19.265 | 1327140 | VV   | .144  | 100.00000 |

TOTAL AREA=1327140  
MUL FACTOR=1.00000E+00

IF

13d using (dppb)CoCl2 (entry 4, Table 3)  
cyclodex-B 65 degree/30 min increase temp 2 degree per min to 80 degree

99.144 96.652

END OF SIGNAL

Closing signal file M:SIGNAL .BNA

RUN# 4040 AUG 20, 2009 23:25:01

SIGNAL FILE: M:SIGNAL.BNA

AREA%

| RT     | AREA   | TYPE | WIDTH | AREA%    |
|--------|--------|------|-------|----------|
| 96.652 | 116697 | BU   | .896  | 51.77582 |
| 99.144 | 108692 | UB   | 1.034 | 48.22418 |



START

IF

IF

13d using (DIOP)CoCl<sub>2</sub> (entry 8, Table 5)  
methylsilicone 130 degree isotherm

19.240

TIMETABLE STOP

Error storing signal to M:\SIGNAL .RAW  
ATTEMPTED WRITE PAST END OF FILE

RUN# 863 JUL 10, 1981 12:19:24

AREA%

| RT     | AREA   | TYPE | WIDTH | AREA%     |
|--------|--------|------|-------|-----------|
| 19.240 | 824759 | PP\  | .145  | 100.00000 |

TOTAL AREA= 824759

MUL FACTOR=1.0000E+00

\*  
\*  
\*  
\*  
\*  
\*  
\*  
\*  
\*  
\*

IF

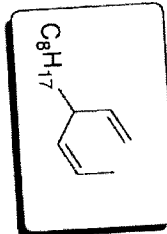

(RR)-(-)-DIOP/COC<sub>2</sub>H<sub>4</sub>-45 °C  
(Cyclodex-, B, 65 °C/30 min./0.2 °C  
per min. to 80 °C)

(Entry 8, Table 5)

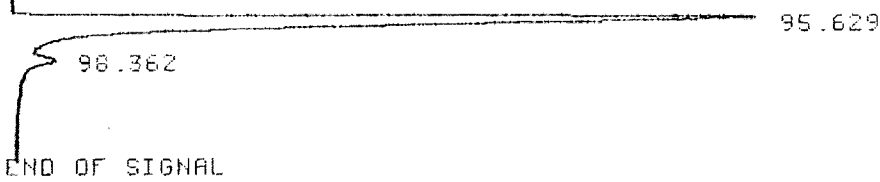

Closing signal file M:SIGNAL .BNA

RUN# 3973 JUN 30, 2009 02:46:41

SIGNAL FILE: M:SIGNAL.BNA

| RT     | AREA   | TYPE | WIDTH | AREA%    |
|--------|--------|------|-------|----------|
| 95.629 | 132930 | PU   | .794  | 99.11424 |
| 98.362 | 1188   | UV   | .189  | .88579   |

TOTAL AREA= 134118  
MID FACTOR=1.0000E+00

74

5% (-) DIOP/CoCl<sub>2</sub> / -45°C / 66w C<sub>8</sub>H<sub>17</sub>

|       |       |       |       |       |       |       |       |       |       |       |       |       |       |       |       |       |       |       |       |       |       |       |       |       |       |       |       |       |       |       |       |       |       |       |       |       |       |       |       |       |       |       |       |       |       |       |       |       |       |       |       |       |       |       |       |       |       |       |       |       |       |       |       |       |       |       |       |       |       |       |
|-------|-------|-------|-------|-------|-------|-------|-------|-------|-------|-------|-------|-------|-------|-------|-------|-------|-------|-------|-------|-------|-------|-------|-------|-------|-------|-------|-------|-------|-------|-------|-------|-------|-------|-------|-------|-------|-------|-------|-------|-------|-------|-------|-------|-------|-------|-------|-------|-------|-------|-------|-------|-------|-------|-------|-------|-------|-------|-------|-------|-------|-------|-------|-------|-------|-------|-------|-------|-------|-------|-------|
| 7.283 | 5.767 | 5.753 | 5.747 | 5.733 | 5.719 | 5.712 | 5.698 | 5.537 | 5.536 | 5.529 | 5.527 | 5.524 | 5.522 | 5.516 | 5.514 | 5.510 | 5.509 | 5.502 | 5.501 | 5.489 | 5.487 | 5.265 | 5.262 | 5.258 | 5.255 | 5.246 | 5.243 | 5.240 | 5.237 | 5.225 | 5.221 | 5.218 | 5.025 | 5.022 | 5.019 | 4.991 | 4.984 | 4.965 | 4.963 | 4.962 | 4.960 | 4.945 | 4.943 | 4.939 | 3.056 | 3.042 | 3.025 | 2.382 | 1.654 | 1.651 | 1.641 | 1.637 | 1.545 | 1.456 | 1.450 | 1.442 | 1.429 | 1.341 | 1.328 | 1.292 | 1.003 | 0.990 | 0.948 | 0.933 | 0.927 | 0.922 | 0.913 | 0.909 | 0.899 | 0.894 |
|-------|-------|-------|-------|-------|-------|-------|-------|-------|-------|-------|-------|-------|-------|-------|-------|-------|-------|-------|-------|-------|-------|-------|-------|-------|-------|-------|-------|-------|-------|-------|-------|-------|-------|-------|-------|-------|-------|-------|-------|-------|-------|-------|-------|-------|-------|-------|-------|-------|-------|-------|-------|-------|-------|-------|-------|-------|-------|-------|-------|-------|-------|-------|-------|-------|-------|-------|-------|-------|-------|-------|

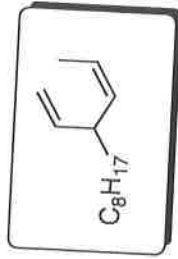

(RR)-(-)-DIOP/CoCl<sub>2</sub> / -45 °C

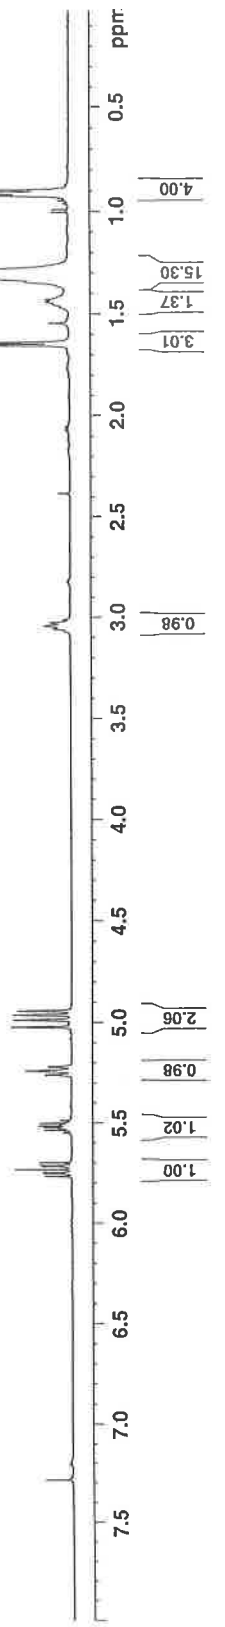

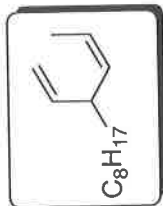

41.26  
35.29  
31.90  
29.68  
29.59  
29.32  
27.13  
22.67  
14.09  
13.02

77.25  
77.00  
76.75

141.88  
133.24  
123.78  
112.87

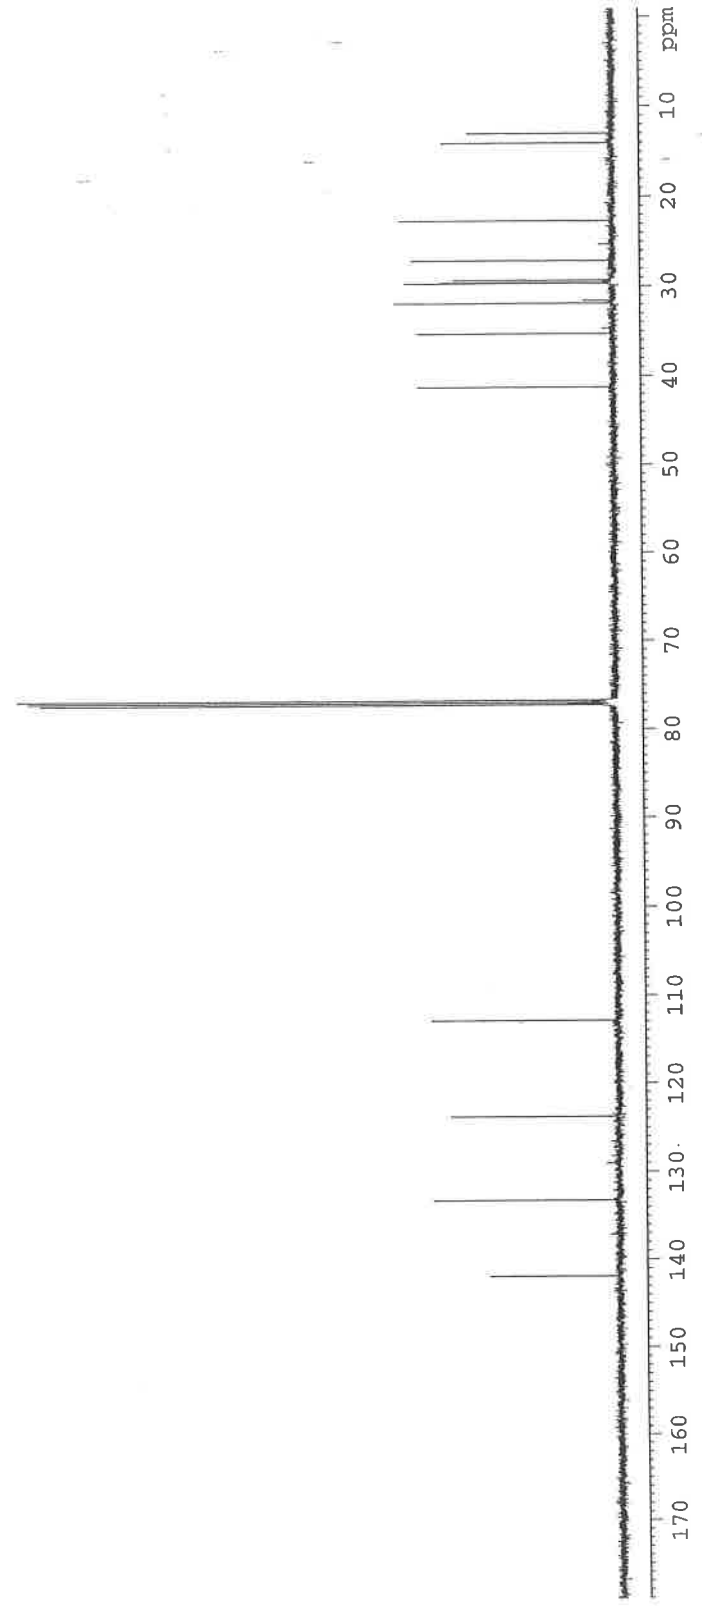

## Hydrovinylation of (*E/Z*)-1-cyclohexyl-1,3-butadiene

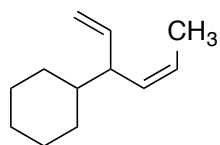

**Hydrovinylation of (*E/Z*)-1-cyclohexyl-1,3-butadiene using [DPPB]CoCl<sub>2</sub> (Table 3, Entry 6):** To an oven dried round bottom flask with a sidearm, was added DPPBCoCl<sub>2</sub> (30 mg, 0.053 mmol) and methylaluminoxane (62 mg, 1.06 mmol) under argon. The color of the solution changed from deep blue to red brown with the formation of white fumes over the addition of dichloromethane solvent (1 mL). After 2 to 3 minutes, the reaction vessel was carefully evacuated and then refilled with ethylene balloon. The reaction vessel was kept at -10 °C and (*E/Z*)-1-cyclohexyl-1,3-butadiene (72 mg, 0.53mmol), mixture of *E:Z* in the ratio of 45:55, was added via syringe under ethylene and the mixture was stirred for 8 h. The ethylene balloon was removed and 0.1 mL methanol was added into the flask. The reaction solution was diluted with pentane (2 mL) and warmed to room temperature and subsequently passed through a silica plug. The plug was washed with pentane (3 x 5 mL). Removal of the solvent yielded the product as colorless oil (78 mg, 90%). GC and NMR analysis showed that the product (**13e**) was essentially pure. <sup>1</sup>H NMR (CDCl<sub>3</sub>, 400 MHz): 1.07 - 1.26 (m, 6 H), 1.58 (dd, J = 1.6, 7 Hz, 3 H), 1.62 - 1.73 (m, 5 H), 2.79 (q, J = 8 Hz, 1 H), 4.91 - 4.91 (m, 1 H), 4.94 - 4.96 (m, 1 H), 5.24 - 5.30 (m, 1 H), 5.45 - 5.33 (m, 1 H), 5.62 - 5.71 (m, 1 H). <sup>13</sup>C NMR (CDCl<sub>3</sub>, 125.02 MHz): 13.11, 26.48, 26.54, 26.64, 30.29, 30.95, 42.16, 47.75, 113.82, 124.02, 131.75, 140.55. Gas Chromatography: Methyl silicone SP GC (OT 90 °C/ isothermal) R<sub>t</sub> for product = 17.05 min. CSP GC (Cyclodex, OT 100 °C/ isothermal, He carrier gas): starting material R<sub>T</sub> = 25.28 min. for *Z*-diene and 29.84 for *E* diene. R<sub>T</sub> for product = 45.19 min and 46.35 min (enantiomers, racemic). CSP GC (Cyclosil, OT 80 °C/ isothermal) R<sub>T</sub> for product = 34.52 min and 37.04 min (enantiomers, racemic).

An enantioselectivity of 84 %ee was obtained with (*S,S*)-[DIOP]CoCl<sub>2</sub> (at -10 °C, 8 h) with only the *E*-diene undergoing the conversion. With this ligand, when both *E* and *Z* are converted, maximum enantioselectivity is only 15%. With (*R,R*)-[BDPP]CoCl<sub>2</sub> and *E* and *Z* full conversion, maximum enantioselectivity is 35% [determined by CSP GC].

The following table shows the detail of HV reactions using (*E/Z*)-mixture of 1-cyclohexyl-1,3-diene using various ligands.

| Entry | Ligand                | Temp (°C) /Time (h) | Activator | Conv. of isomer shown (%)    | Product                                         |
|-------|-----------------------|---------------------|-----------|------------------------------|-------------------------------------------------|
| 1.    | [DPPM]                | -28/7               | MAO       | 49 ( <i>E</i> & <i>Z</i> )   | Mixture of 1,2 and 1,4-HV                       |
| 2.    | ( <i>S,S</i> )-[DIOP] | -15/14              | MAO       | 98% (only <i>E</i> )         | 1,4- ( <i>Z</i> )- HV, 84% ee.                  |
| 3.    | ( <i>S,S</i> )-[DIOP] | -10/8               | MAO       | 100% ( <i>E</i> & <i>Z</i> ) | 1,4- ( <i>Z</i> )- HV, 15% ee                   |
| 4.    | Josiphos 1 <b>L17</b> | -10/12              | MAO       | 100% (only <i>E</i> )        | 1,4- ( <i>Z</i> )- HV, 34% ee                   |
| 5.    | Josiphos 2 <b>L18</b> | -10/8               | TMA       | 80% (only <i>E</i> )         | 1,4- ( <i>Z</i> )- HV, 64% ee                   |
| 6.    | ( <i>R,R</i> )-[BDPP] | -10/11              | MAO       | 100% ( <i>E</i> & <i>Z</i> ) | 1,4- ( <i>Z</i> )- HV(78%), 35% ee, linear(21%) |

**Unsuccessful hydrovinylation of (only *Z*)-1-cyclohexyl-1,3-butadiene using (*S,S*)[DIOP]CoCl<sub>2</sub> and TMA (Table 5, Entry 11, but only *Z*-isomer).** To an oven dried round bottom flask with a side-arm, was added (*S,S*)[DIOP]CoCl<sub>2</sub> (15 mg, 0.024 mmol) dissolved in dichloromethane (1 mL) at room temperature. Trimethylaluminium as a 2M solution in toluene (0.03 mL, 0.072 mmol) was added dropwise and the color of the solution changed from deep blue to red brown with the formation of white fumes over the solution. After 2 to 3 minutes, the reaction vessel was carefully evacuated and then refilled with ethylene from balloon. The reaction vessel was cooled to -12 °C and (*Z*)-1-cyclohexyl-1,3-butadiene (32 mg, 0.23 mmol) added under ethylene and the mixture was stirred for 12 h at -12 °C. The ethylene balloon was removed and 0.1 mL methanol was added into the flask. The reaction solution was diluted with pentane (5 mL) and warmed to room temperature and subsequently passed through a silica plug very quickly. The plug was washed with pentane (3 x 6 mL). Removal of solvent was difficult so GC and NMR analysis showed that the product was complex mixture of many unidentified different compounds along with starting material.

04/00 / d1960cb / TNA  
90% isolation

\*  
\*  
\*  
\*  
\*

\* RUN # 348 APR 12, 1901 01:23:22

START

GC (HP-5, methyl silicone, 90 degree) of Compound 13e (HV  
using Cl2Co(DPPB) (entry 6, Table 3)

IF

IF

IF

IF

16.737

17.054

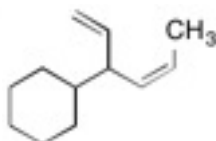

TIMETABLE STOP

RUN# 348 APR 12, 1901 01:23:22

AREA%

| RT     | AREA   | TYPE | WIDTH | AREA%    |
|--------|--------|------|-------|----------|
| 16.737 | 22651  | PV   | .140  | 4.48270  |
| 17.054 | 482647 | VB   | .145  | 95.51731 |

TOTAL AREA= 505298

MUL FACTOR=1.0000E+00

\*

Sample Name: YT-04-20RE.D

```

=====
Acq. Operator   : YAM                      Seq. Line :    1
Acq. Instrument : Babu                    Location  : Vial 201
Injection Date  : 2/22/2013 11:31:29 AM   Inj       :    1
                                           Inj Volume: 1 µl
Different Inj Volume from Sequence !      Actual Inj Volume : 3 µl
Acq. Method     : C:\CHEM32\1\DATA\YAM\CC-CHIRAL 2013-02-22 11-30-24\YT_85_C_CHIRAL.M
Last changed    : 2/22/2013 10:09:50 AM by YAM
Analysis Method : C:\CHEM32\1\METHODS\YT_85_C_CHIRAL.M
Last changed    : 2/22/2013 12:23:56 PM by YAM
                (modified after loading)
    
```

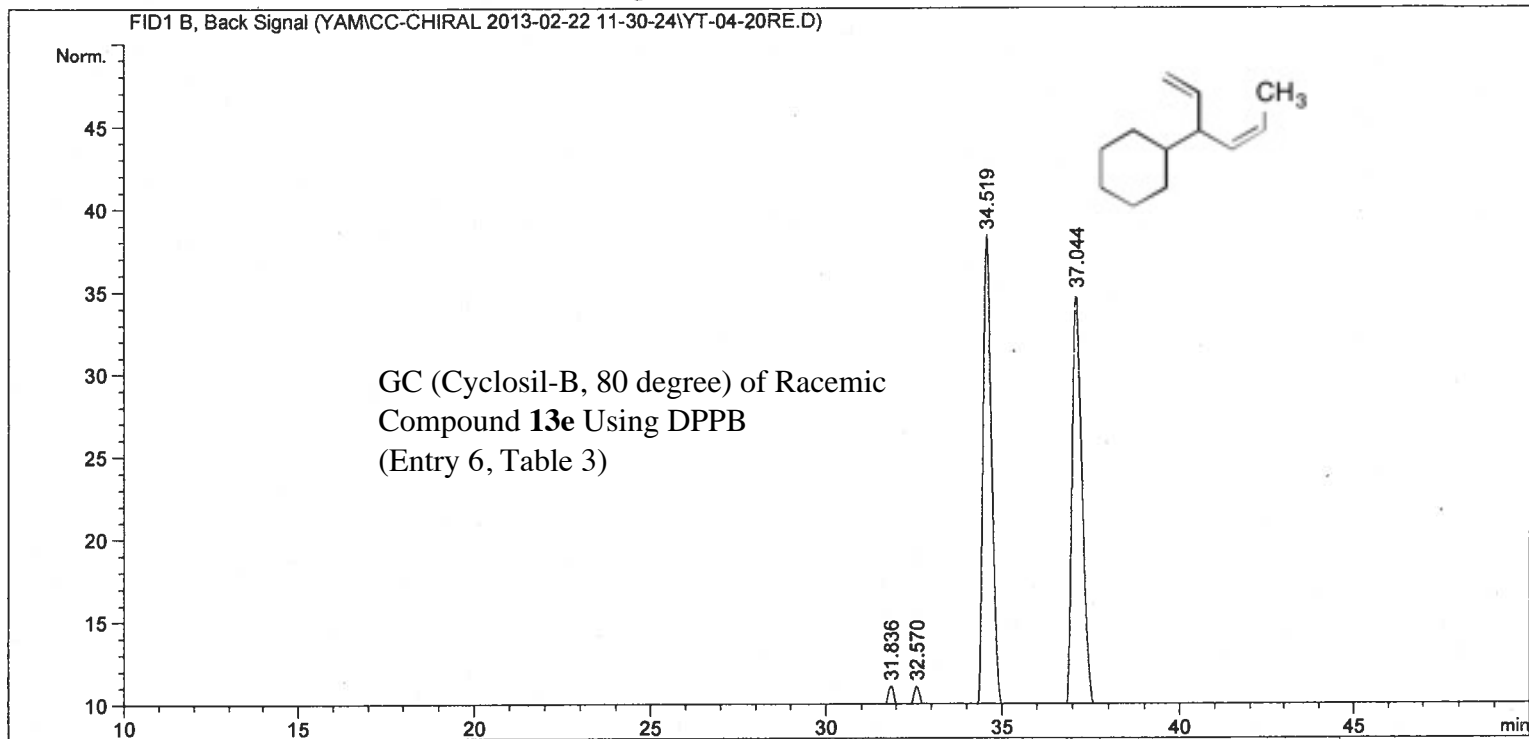

Area Percent Report

```

Sorted By      :      Signal
Multiplier:    :      1.0000
Dilution:      :      1.0000
Use Multiplier & Dilution Factor with ISTDs
    
```

Signal 1: FID1 B, Back Signal

| Peak # | RetTime [min] | Type | Width [min] | Area [pA*s] | Height [pA] | Area %   |
|--------|---------------|------|-------------|-------------|-------------|----------|
| 1      | 31.836        | BB   | 0.2275      | 24.61501    | 1.67404     | 2.32915  |
| 2      | 32.570        | BB   | 0.2370      | 25.28156    | 1.65907     | 2.39223  |
| 3      | 34.519        | BB   | 0.2568      | 502.73248   | 28.98533    | 47.57022 |
| 4      | 37.044        | BB   | 0.2822      | 504.19278   | 25.46459    | 47.70840 |



04-14-7109 04:39:12  
Gibbs  
C

\*  
\*  
\*  
\*  
\* RUN # 350 APR 12, 1901 04:39:12  
START

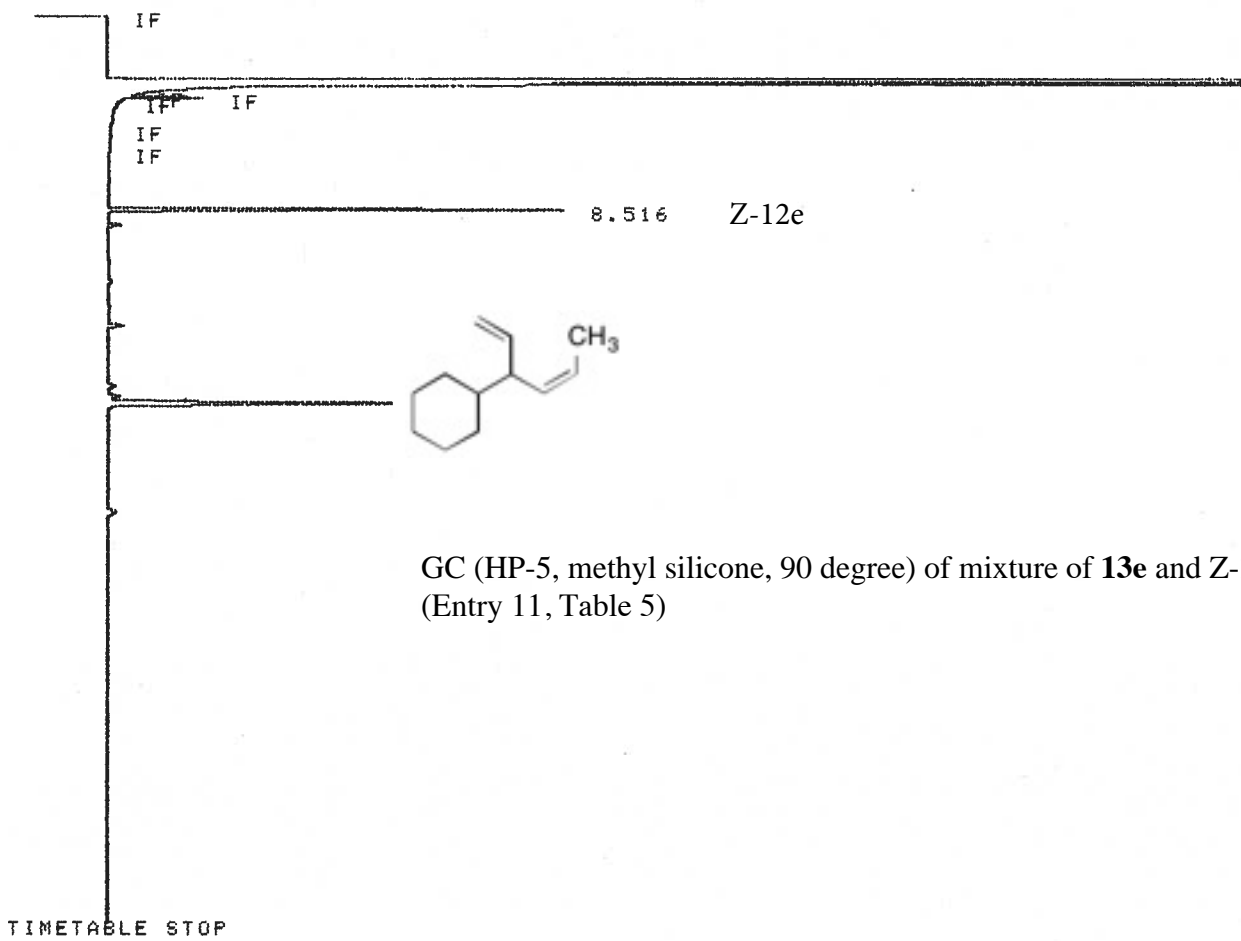

GC (HP-5, methyl silicone, 90 degree) of mixture of 13e and Z-12e  
(Entry 11, Table 5)

RUN# 350 APR 12, 1901 04:39:12

| RT     | AREA   | TYPE | WIDTH | AREA%    |
|--------|--------|------|-------|----------|
| 8.516  | 117127 | PB   | .075  | 45.38170 |
| 17.052 | 140966 | VB   | .145  | 54.61829 |

TOTAL AREA= 258093  
MUL FACTOR=1.0000E+00

```

=====
Acq. Operator   : YAM                      Seq. Line :    1
Acq. Instrument : Babu                    Location  : Vial 201
Injection Date  : 2/22/2013 2:47:24 PM    Inj       :    1
                                           Inj Volume: 1 µl
Different Inj Volume from Sequence !      Actual Inj Volume : 3 µl
Acq. Method     : C:\CHEM32\1\DATA\YAM\CC-CHIRAL 2013-02-22 14-46-19\YT_85_C_CHIRAL.M
Last changed    : 2/22/2013 2:46:17 PM by YAM
Analysis Method : C:\CHEM32\1\METHODS\YT_85_C_CHIRAL.M
Last changed    : 2/22/2013 2:46:17 PM by YAM
=====
  
```

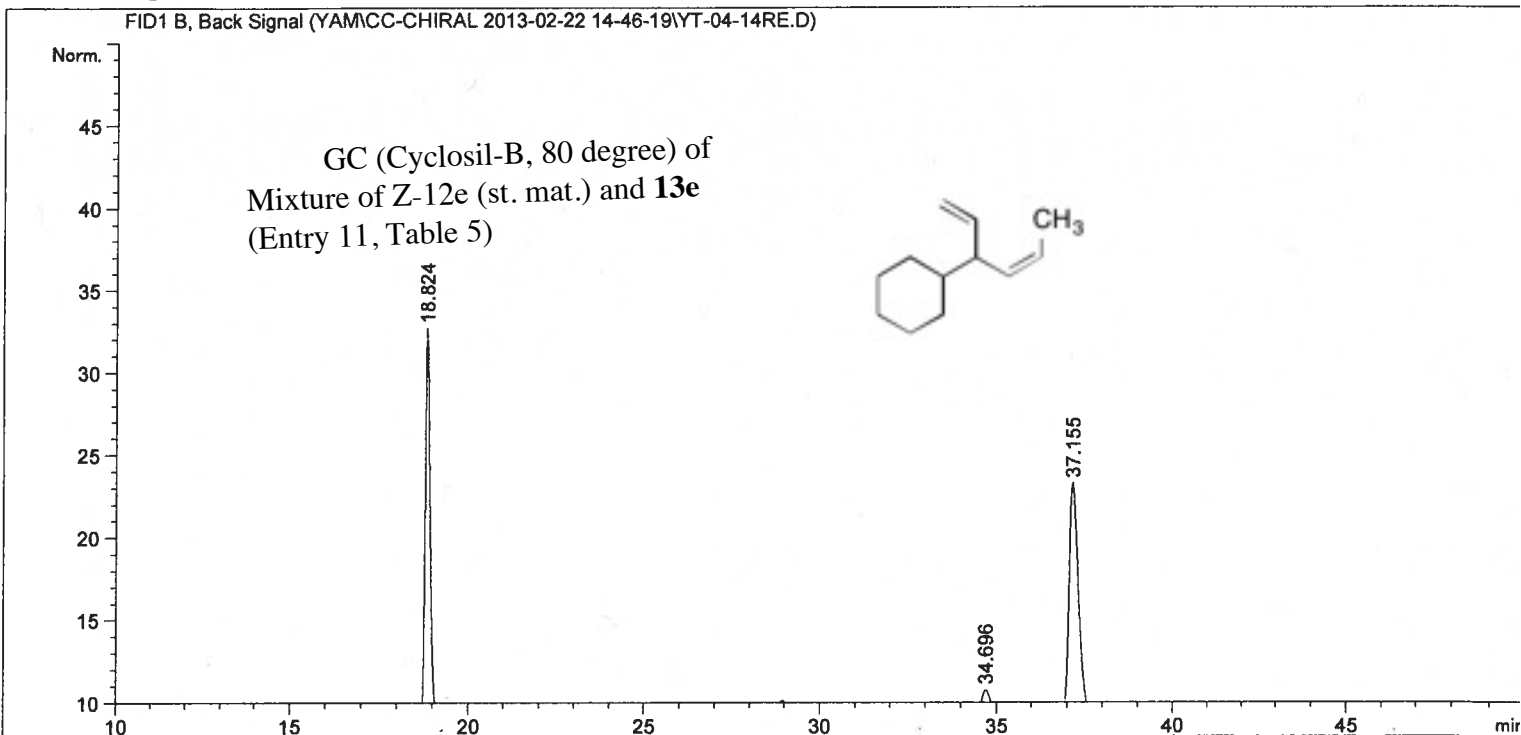

=====  
 Area Percent Report  
 =====

```

Sorted By      :      Signal
Multiplier:    :      1.0000
Dilution:      :      1.0000
Use Multiplier & Dilution Factor with ISTDs
  
```

Signal 1: FID1 B, Back Signal

| Peak #   | RetTime [min] | Type | Width [min] | Area [pA*s] | Height [pA] | Area %   |
|----------|---------------|------|-------------|-------------|-------------|----------|
| 1        | 18.824        | BB   | 0.1434      | 222.28169   | 23.27076    | 44.91272 |
| 2        | 34.696        | BB   | 0.2530      | 21.26893    | 1.31316     | 4.29745  |
| 3        | 37.155        | BB   | 0.2727      | 251.36865   | 13.84104    | 50.78983 |
| Totals : |               |      |             | 494.91927   | 38.42496    |          |

5.707  
5.687  
5.683  
5.663  
5.643  
5.639  
5.619  
5.531  
5.514  
5.503  
5.499  
5.497  
5.487  
5.480  
5.470  
5.453  
5.300  
5.296  
5.276  
5.271  
5.269  
5.253  
5.248  
5.244  
4.958  
4.953  
4.950  
4.942  
4.937  
4.913  
4.912  
4.906  
2.825  
2.805  
2.782  
2.762  
1.728  
1.700  
1.689  
1.685  
1.668  
1.654  
1.619  
1.591  
1.587  
1.574  
1.570  
1.263  
1.255  
1.235  
1.227  
1.217  
1.207  
1.198  
1.188  
1.180  
1.171  
1.163  
1.158  
1.151  
1.129  
1.114  
1.107  
1.100  
1.084  
1.077  
1.069  
0.954  
0.946  
0.921  
0.915  
0.891  
0.885  
0.860  
0.841  
0.832  
0.821

yt-04-20/dppb/2/MAO  
-10c/941

Current Data Parameters  
 NAME yt-04-20againre  
 EXPNO 60  
 PROCNO 1

F2 - Acquisition Parameters  
 Date 20130222  
 Time 11.29  
 INSTRUM spect  
 PROBHD 5 mm BBI 1H-BB  
 PULPROG zg30  
 TD 65536  
 SOLVENT CDCl3  
 NS 16  
 DS 2  
 SWH 8250.825 Hz  
 FIDRES 0.125898 Hz  
 AQ 3.9715316 sec  
 RG 287.4  
 DW 60.600 usec  
 DE 6.00 usec  
 TE 300.2 K  
 D1 1.00000000 sec  
 TDO 1

===== CHANNEL f1 =====  
 NUC1 1H  
 P1 8.00 usec  
 PL1 -2.65 dB  
 SFO1 400.1324710 MHz

F2 - Processing parameters  
 SI 32768  
 SF 400.1300203 MHz  
 WDW EM  
 SSB 0  
 LB 0.30 Hz  
 GB 0  
 PC 1.00

Proton NMR (400 MHz, D-chloroform) spectrum of Compound **13e** (HV using DPPB) (entry 6, Table 3)

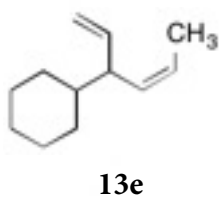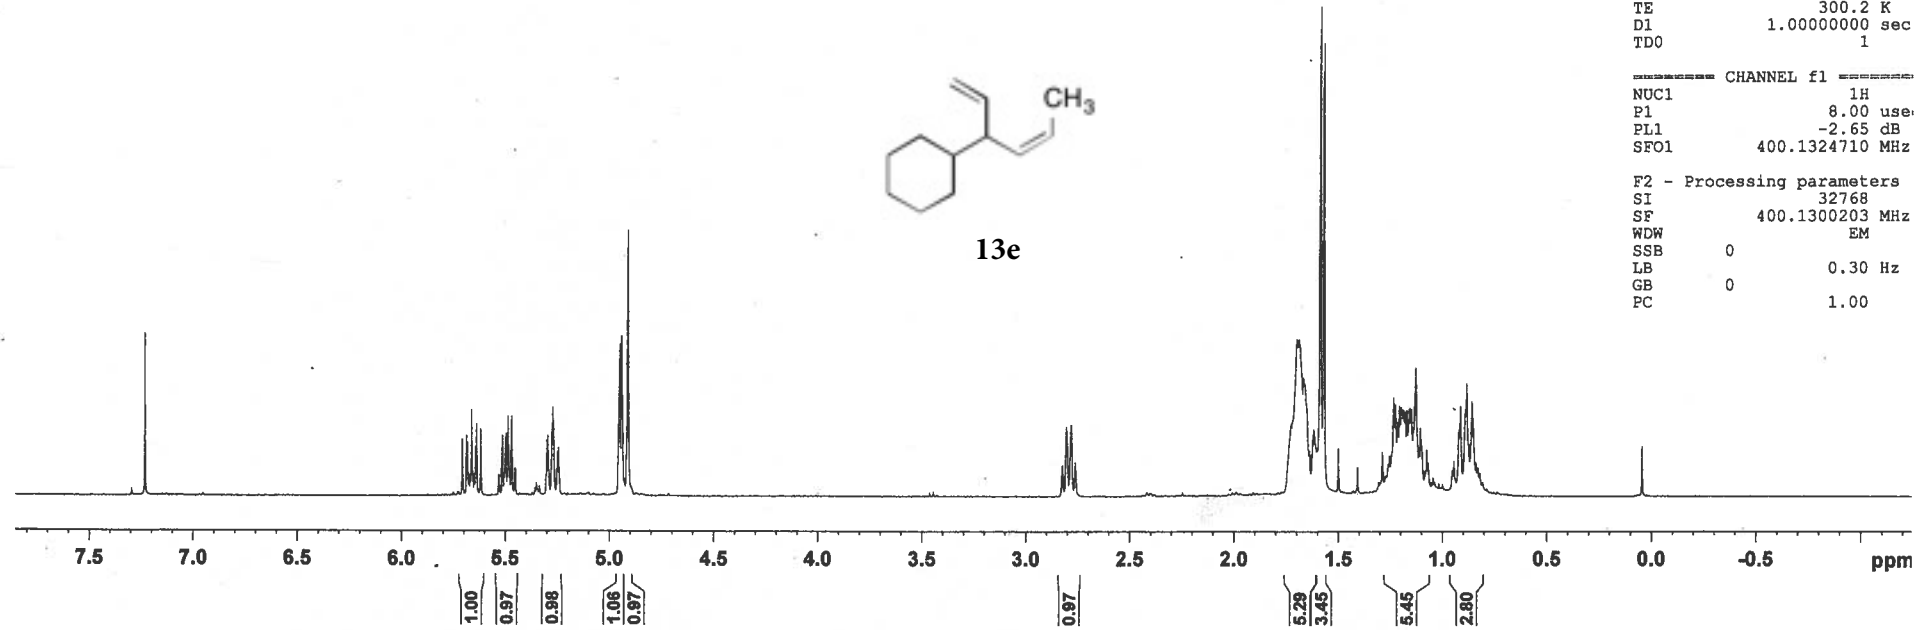

Proton NMR (400 MHz, D-chloroform) spectrum of compound **13e** (HV using DPPB, Alkene Region Expansion)

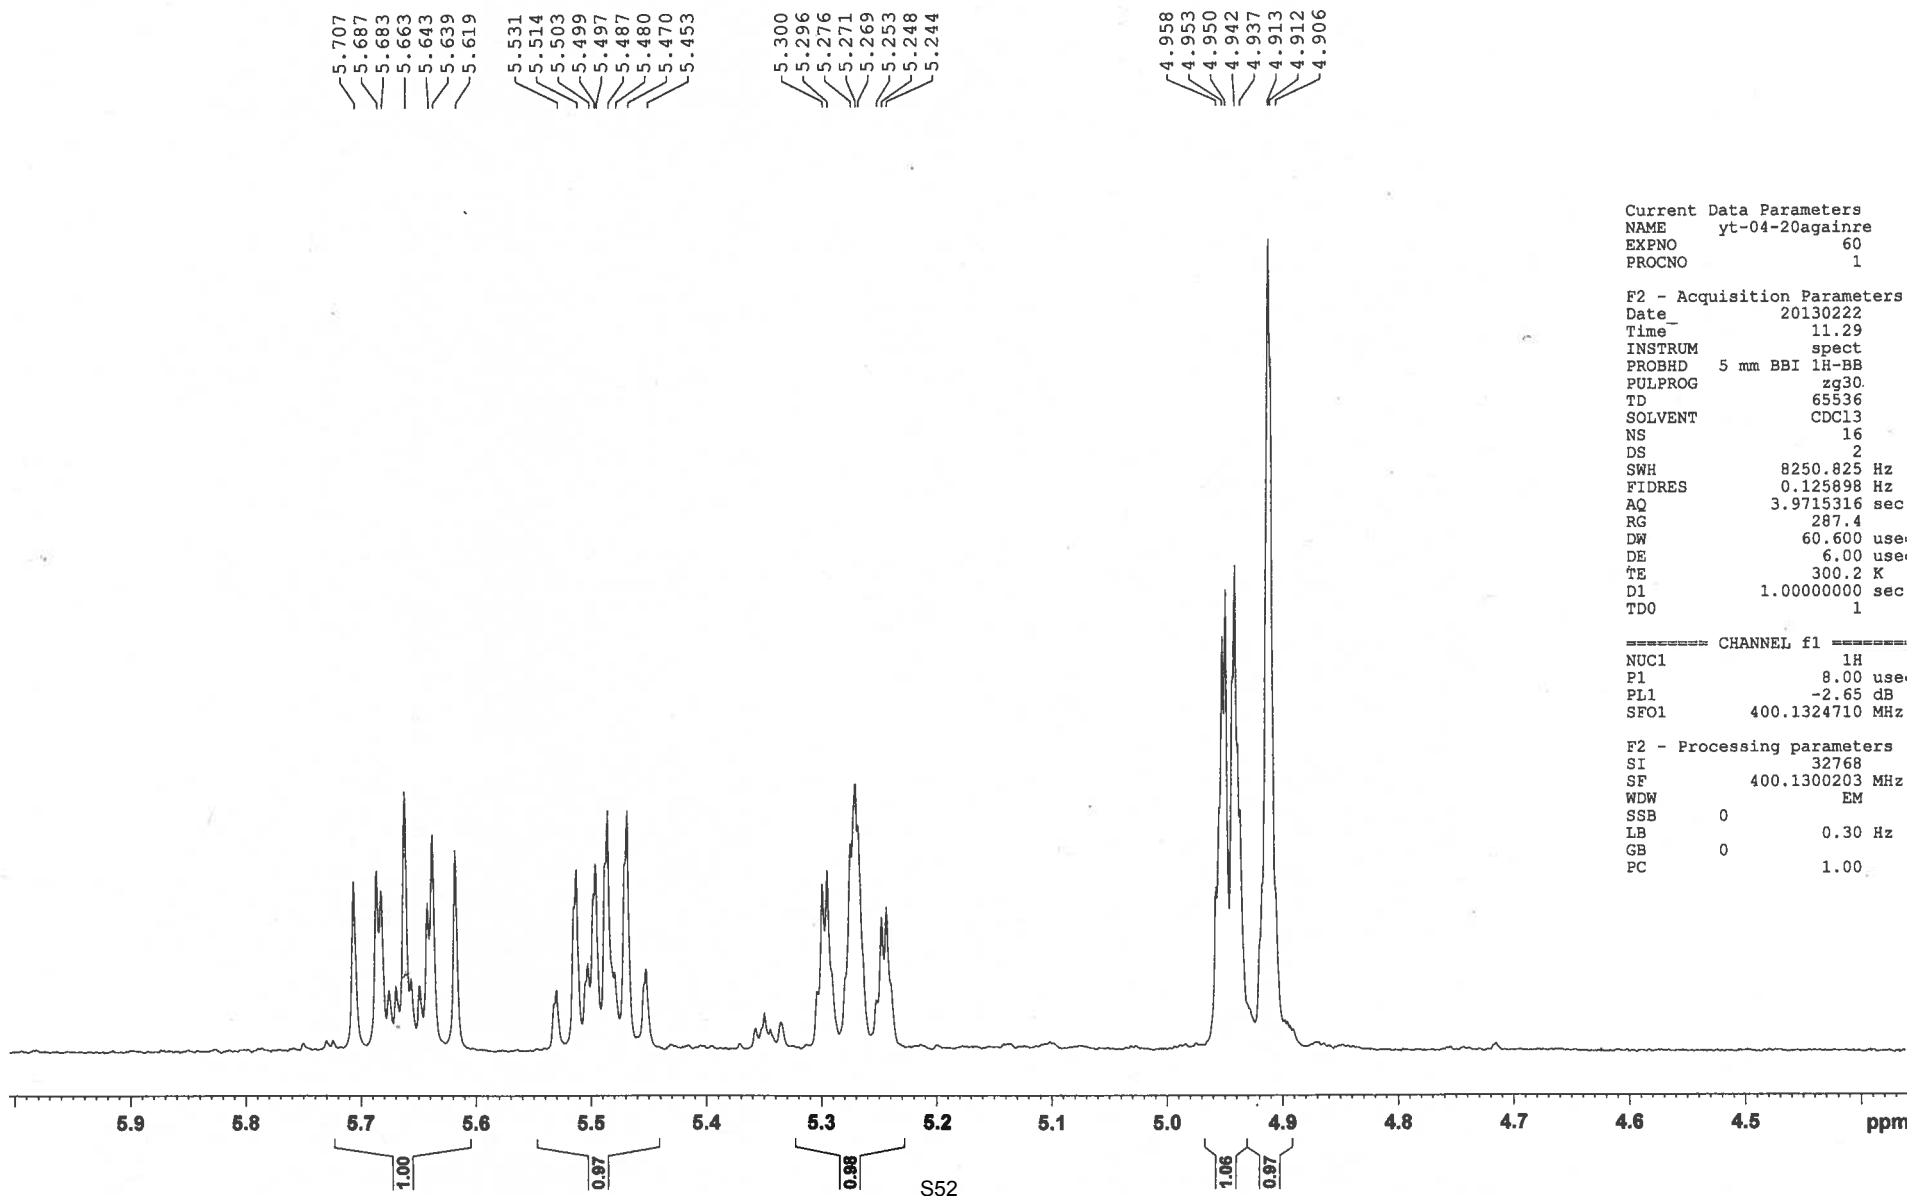

Carbon NMR (100 MHz, D-chloroform) spectrum of Compound 13e

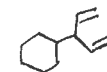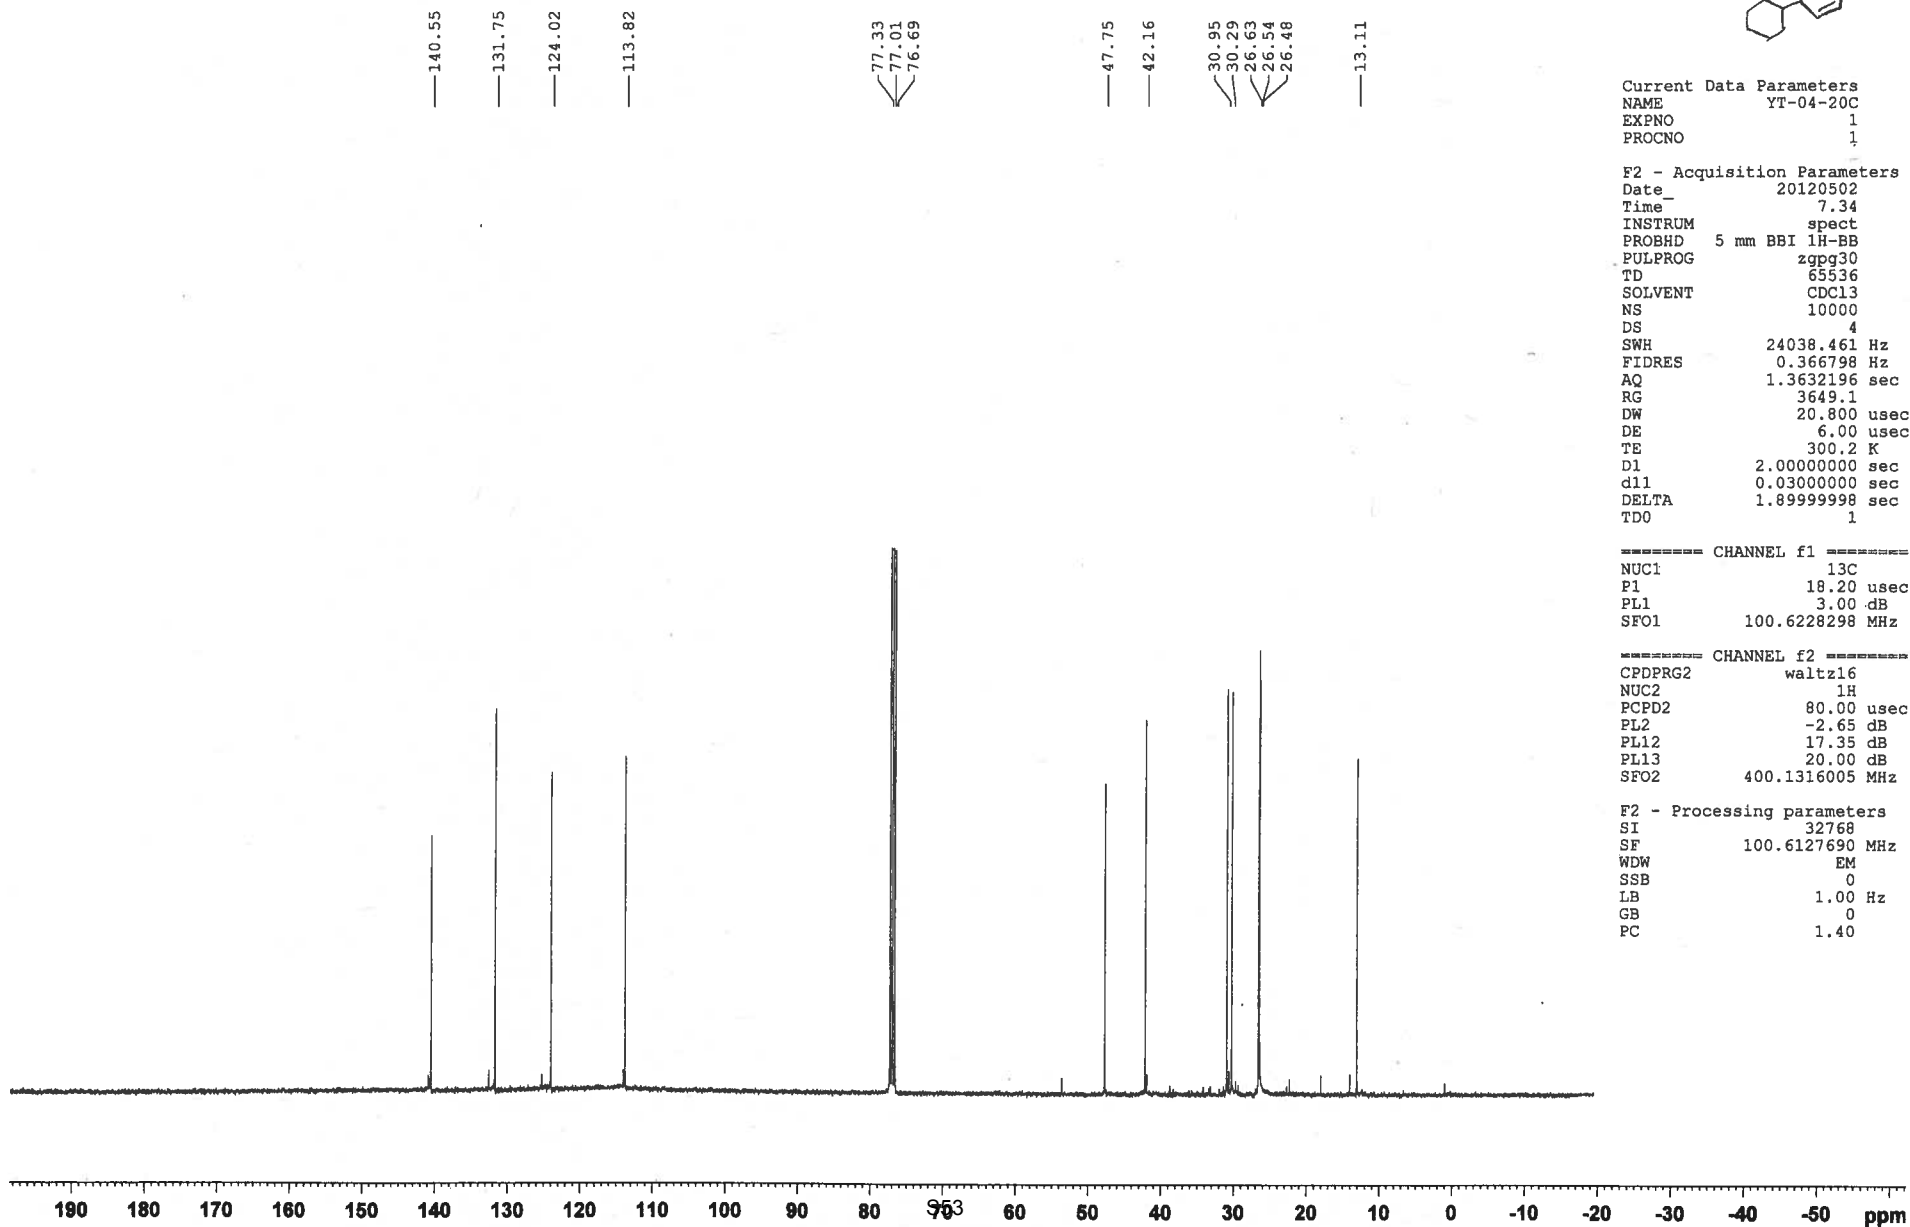

Current Data Parameters  
 NAME YT-04-20C  
 EXPNO 1  
 PROCNO 1

F2 - Acquisition Parameters  
 Date\_ 20120502  
 Time\_ 7.34  
 INSTRUM spect  
 PROBHD 5 mm BBI 1H-BB  
 PULPROG zgpg30  
 TD 65536  
 SOLVENT CDCl3  
 NS 10000  
 DS 4  
 SWH 24038.461 Hz  
 FIDRES 0.366798 Hz  
 AQ 1.3632196 sec  
 RG 3649.1  
 DW 20.800 usec  
 DE 6.00 usec  
 TE 300.2 K  
 D1 2.00000000 sec  
 d11 0.03000000 sec  
 DELTA 1.89999998 sec  
 TDO 1

6.643  
6.626  
6.615  
6.601  
6.573  
6.573  
5.897  
5.870  
5.842  
5.706  
5.686  
5.682  
5.675  
5.668  
5.662  
5.648  
5.641  
5.638  
5.618  
5.530  
5.513  
5.496  
5.486  
5.469  
5.452  
5.299  
5.295  
5.274  
5.247  
5.243  
5.162  
5.120  
5.052  
5.027  
4.951  
4.949  
4.941  
4.912  
2.823  
2.803  
2.781  
2.761  
2.462  
2.436  
2.410  
2.383  
1.698  
1.684  
1.676  
1.667  
1.653  
1.613  
1.589  
1.585  
1.573  
1.568  
1.296  
1.289  
1.257  
1.234  
1.226  
1.206  
1.192  
1.186  
1.178  
1.170  
1.162  
1.156  
1.128  
1.105  
1.075  
1.048  
1.041  
1.024  
1.010  
0.952  
0.944  
0.913  
0.883  
0.858  
0.840  
0.820

SS Diopracol 2/MAO  
-15C/14445  
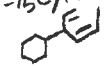

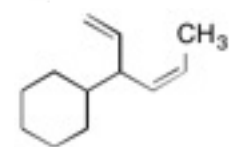

+ unreacted Z-12e

(Entry 11, Table 5)

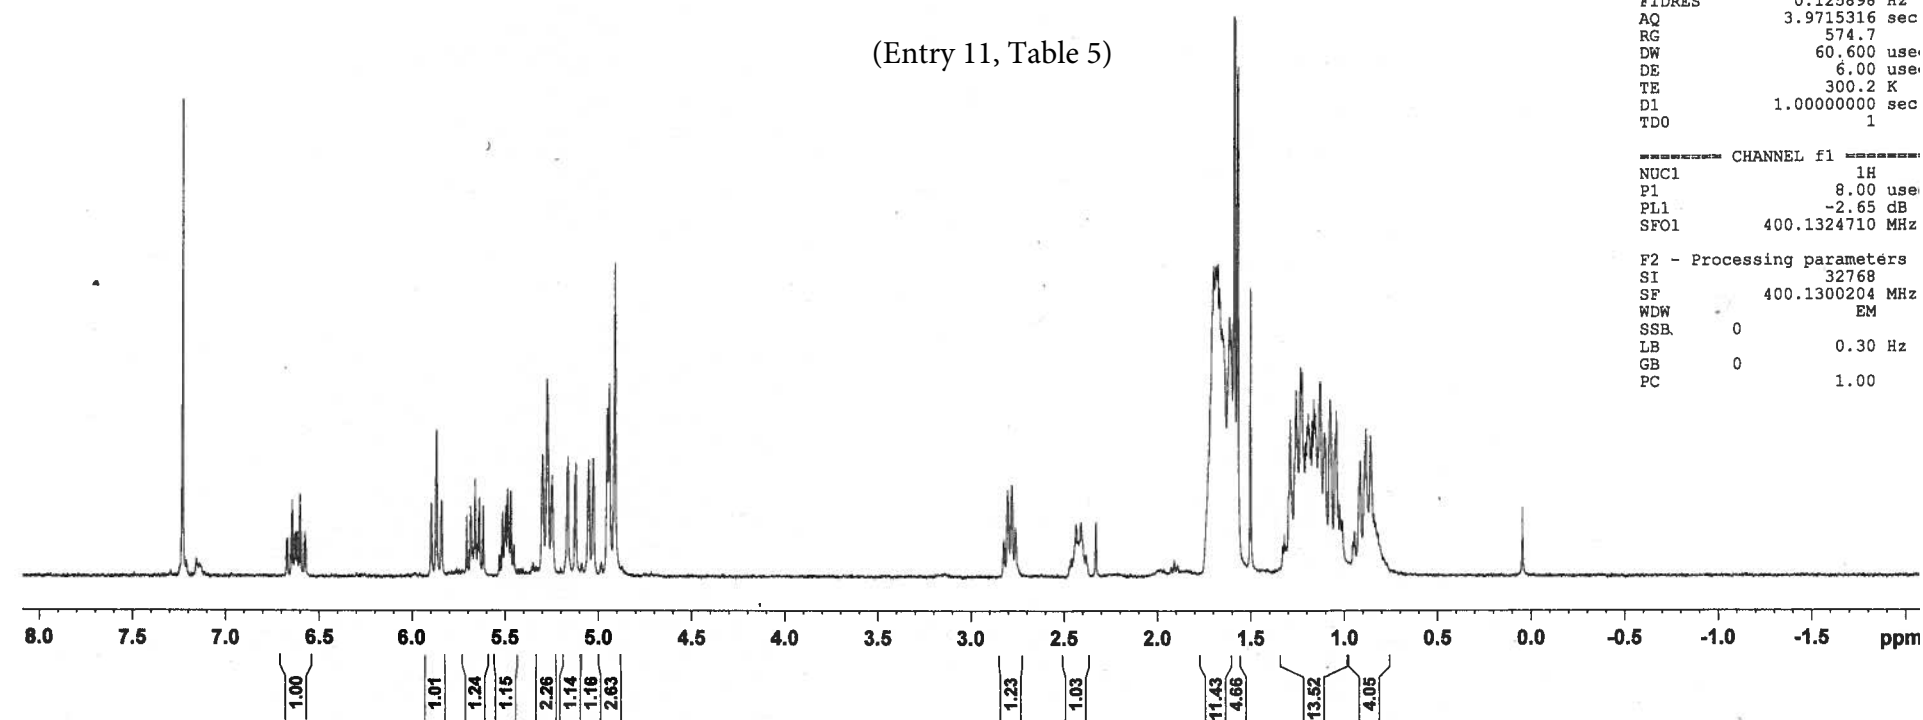

Current Data Parameters  
NAME yt-04-14reproton  
EXPNO 65  
PROCNO 1

F2 - Acquisition Parameters  
Date\_ 20130222  
Time 17.47  
INSTRUM spect  
PROBHD 5 mm BBI 1H-BB  
PULPROG zg30  
TD 65536  
SOLVENT CDCl3  
NS 16  
DS 2  
SWH 8250.825 Hz  
FIDRES 0.125698 Hz  
AQ 3.9715316 sec  
RG 574.7  
DW 60.600 usec  
DE 6.00 usec  
TE 300.2 K  
D1 1.00000000 sec  
TDO 1

CHANNEL f1  
NUC1 1H  
P1 8.00 usec  
PL1 -2.65 dB  
SFO1 400.1324710 MHz

F2 - Processing parameters  
SI 32768  
SF 400.1300204 MHz  
WDW EM  
SSB 0  
LB 0.30 Hz  
GB 0  
PC 1.00

Proton NMR (400 MHz, D-Chloroform) Spectra of Mixture of 119 and Z-118 Using SS-DIOP

## Hydrovinylation of (*E*)-1,3-pentadiene (12f)<sup>2</sup>

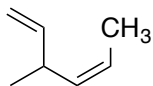

**Hydrovinylation of (*E*)-1,3-pentadiene using [DPPB]CoCl<sub>2</sub>/Me<sub>3</sub>Al at – 10 °C (Table 3, Entry 7).** [Extracted from ref. 2] To an oven-dried round-bottom flask with a sidearm, was added [dppb]CoCl<sub>2</sub> (20.4 mg, 0.037 mmol) under argon and it was dissolved in a mixture of dichloromethane and toluene (1.0 mL) at room temperature. Trimethylaluminum solution (2M) in toluene (0.06 mL 0.11 mmol) was added dropwise as color of the solution changed from deep blue to brown with the formation of white fumes over the solution. When all the fumes disappeared, the reaction vessel was carefully evacuated and then refilled with ethylene from a balloon and a vigorous reaction with evolution of fumes was observed. This evolution stopped in typically within 5 min and the reaction vessel was cooled to – 10 °C and (*E*)-1,3-pentadiene (50.0 mg, 0.74 mmol) was added under ethylene and the mixture was stirred for 6 h. The ethylene balloon was removed and 0.1 mL of water was introduced into the flask and stirring was continued for 5 minutes. The solution was warmed to room temperature and was subsequently passed through a silica plug. The plug was washed with pentane (3 X 10 mL) and pentane was removed under vacuum in acetonitrile bath (-20 °C). Concentration yielded the product as a colorless oil (product + toluene; 501 mg). Isomeric compositions were determined by gas chromatography and NMR spectroscopy (see attached chromatograms and spectra).

<sup>1</sup>H NMR (500 MHz, CDCl<sub>3</sub>): 1.072 (d, 7 Hz, 3 H), 1.570 (dd, 6.5, 1.5, Hz, 1 H), 3.167 (m, 1 H), 4.975 (ddd, 10, 1.5, 1.5, 1 H), 5.055 (ddd, 17, 1.5, 1.5, 1 H), 5.301 (ddq, 10, 10, 1.5 Hz, 1 H), 5.451 (ddq, 10, 1, 6, 1 H), 5.783 (ddd, 17.5, 11.0, 6.5, 1 H), [toluene @ 2.183]

In addition, the following minor peaks are seen in the <sup>1</sup>H NMR: a doublet at 0.009 ppm up-field from the C<sub>sp3</sub>-CH<sub>3</sub>; a triplet of multiplet at 0.417 upfield from the bis-allylic CH at 3.167. These minor peak might correspond to isomeric byproduct(s).

<sup>13</sup>C NMR (CDCl<sub>3</sub>): 12.85, 20.42, 35.20, 112.14, 123.18, 134.30, 142.89.

Isomeric purity by GC (Polydimethylsiloxane): (R<sub>T</sub> = 6.289 min.)

CSP GC (Cyclodex-B, 28 °C): R<sub>T</sub> = 7.36 min (*R*), 7.47 min (*S*). (*E*)-1,3-pentadiene R<sub>T</sub> = 3.20 min., (*Z*)-1,3-pentadiene R<sub>T</sub> = 3.47 min.

Asymmetric hydrovinylation of (*E*)-penta-1,3-diene using (*R,R*)[DIOP]CoCl<sub>2</sub> at -45 °C (6 h) gave the highest ee for this substrate (>90 %ee, Table 5, Entry 12).<sup>2</sup>

**Hydrovinylation of (*E*)-1,3-pentadiene using (*R,R*)-[DIOP]CoCl<sub>2</sub>/Me<sub>3</sub>Al at – 45 °C (Table 5, Entry 12).** To an oven-dried round-bottom flask with a sidearm, was added (*RR*)-[DIOP]CoCl<sub>2</sub> (138 mg, 0.220 mmol) under argon and it was dissolved in a mixture of degassed dichloromethane (6 mL) and toluene (1.5 mL), at 0 °C. Trimethylaluminum solution (2M) in toluene (47.6 mg, 330 μl, 0.6604 mmol) was added dropwise as color of the solution changed from deep blue to red-brown with the formation of white fumes over the solution. When all the fumes disappeared, the reaction vessel was carefully evacuated and then refilled with ethylene from a balloon, a vigorous reaction with evolution of fumes was observed. This evolution stopped in typically within 3-5 min. The reaction vessel was cooled to – 45 °C and (*E*)-1,3-pentadiene (300 mg, 440 μl, 4.404 mmol, *E*:*Z* = 99:1) was added under ethylene and the mixture was stirred for 6 h. The ethylene balloon was removed and 0.2 mL of water was introduced into the flask and stirring was continued for 5 minutes. The solution was warmed to room temperature and was subsequently passed through a silica plug. The plug was washed with pentane (3 x 20 mL). Pentane was removed by evacuation from a cold bath (-20 °C). Product

was distilled bulb to bulb at room temperature as a colorless oil (product + toluene; 668 mg). Isomeric compositions were determined by gas chromatography and NMR spectroscopy (see attached chromatograms and spectra).

*The product from (dppb)CoCl<sub>2</sub>* (Entry 7, Table 3) reaction has, the following signals in addition to the ones due to the major product: a CH<sub>3</sub> (?)-doublet (J = 7 Hz) δ 0.008 down-field from the C<sub>sp3</sub>-CH<sub>3</sub>; a CH<sub>3</sub> doublet of multiplet (J = 5 Hz, 3 H) at δ 0.035 down-field from the major C<sub>sp2</sub>-CH<sub>3</sub> signal; a CH or CH<sub>2</sub> a multiplet δ 0.384 up-field from the bis-allylic CH proton. These peaks correspond to isomeric byproduct as determined by GC (see GC traces: isomeric purity of major product determined by GC 94.5%)

Product **13f** from hydrovinylation using [(*R,R*)-(-)-DIOP]CoCl<sub>2</sub> at -45 °C:  $[\alpha]_{\text{D}}^{24} = -25.6$  (toluene, *c* 11.4); lit.<sup>4</sup>  $[\alpha]_{\text{D}}^{20}$  (CH<sub>2</sub>Cl<sub>2</sub>, *c* 10); -34.8 for **13f** of %ee 37% (*S*); Because of the volatility of the product, there is some uncertainty in these optical rotation measurements. However, the enantioselectivity measured by CSP GC (Cyclodex-B, 28 °C ) is unambiguous (see the attached chromatograms). Enantioselectivity determined by CSP GC: 90.1 % ee (*S*)

Product **13f** from hydrovinylation using [(*S,S*)-(+)-DIOP]CoCl<sub>2</sub> at -45 °C:  $[\alpha]_{\text{D}}^{24} = +29.1$  (toluene, *c* 0.39). Enantioselectivity determined by CSP GC (Cyclodex-B, 28 °C ): 89.1 % ee (*R*).



START

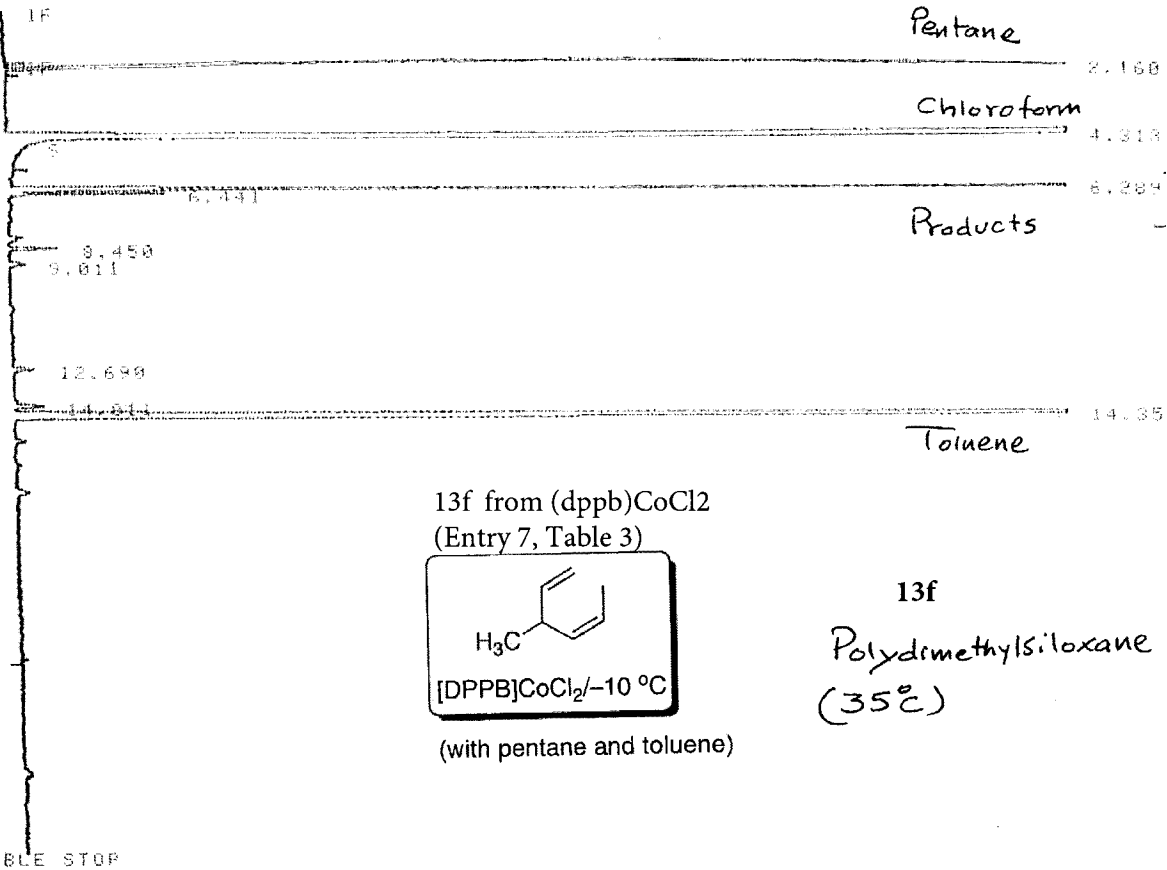

13f from (dppb)CoCl<sub>2</sub>  
(Entry 7, Table 3)

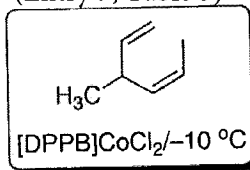

(with pentane and toluene)

13f

Polydimethylsiloxane  
(35°C)

TIMETABLE STOP

Closing signal file M:SIGNAL .BNC

RUN# 1198 JAN 7, 1982 15:54:26

SIGNAL FILE: M:SIGNAL.BNC

| RT     | AREA     | TYPE | WIDTH | AREA%    |
|--------|----------|------|-------|----------|
| 2.160  | 702402   | PV   | .044  | 1.11399  |
| 4.313  | 67521920 | SPR  | .145  | 96.13789 |
| 6.289  | 620577   | BV   | .063  | .08358   |
| 6.441  | 35326    | I VB | .063  | .05030   |
| 8.450  | 14459    | PV   | .079  | .02059   |
| 14.011 | 11865    | PP   | .107  | .01689   |
| 14.354 | 1247962  | PV   | .114  | 1.77685  |

TOTAL AREA=7.0234E+07  
MUL FACTOR=1.0000E+00

13f from (dppb)CoCl<sub>2</sub>  
(entry 7, Table 3)

IF

4.360  
4.455

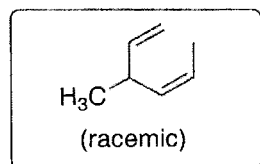

(Cyclodex-B 28 °C)

7.358  
7.470

(R)

7.358  
7.470 (S)

STOP

Closing signal file M:SIGNAL .BNA

RUN# 4164 NOV 30, 2009 02:34:51

SIGNAL FILE: M:SIGNAL.BNA

| RT    | AREA  | TYPE | WIDTH | AREA%    |
|-------|-------|------|-------|----------|
| 4.360 | 1181  | PU   | .039  | 3.45724  |
| 7.358 | 17371 | UU   | .046  | 50.55734 |
| 7.470 | 15807 | UB   | .044  | 46.00542 |

TOTAL AREA= 34359  
MUL FACTOR=1.00000E+00

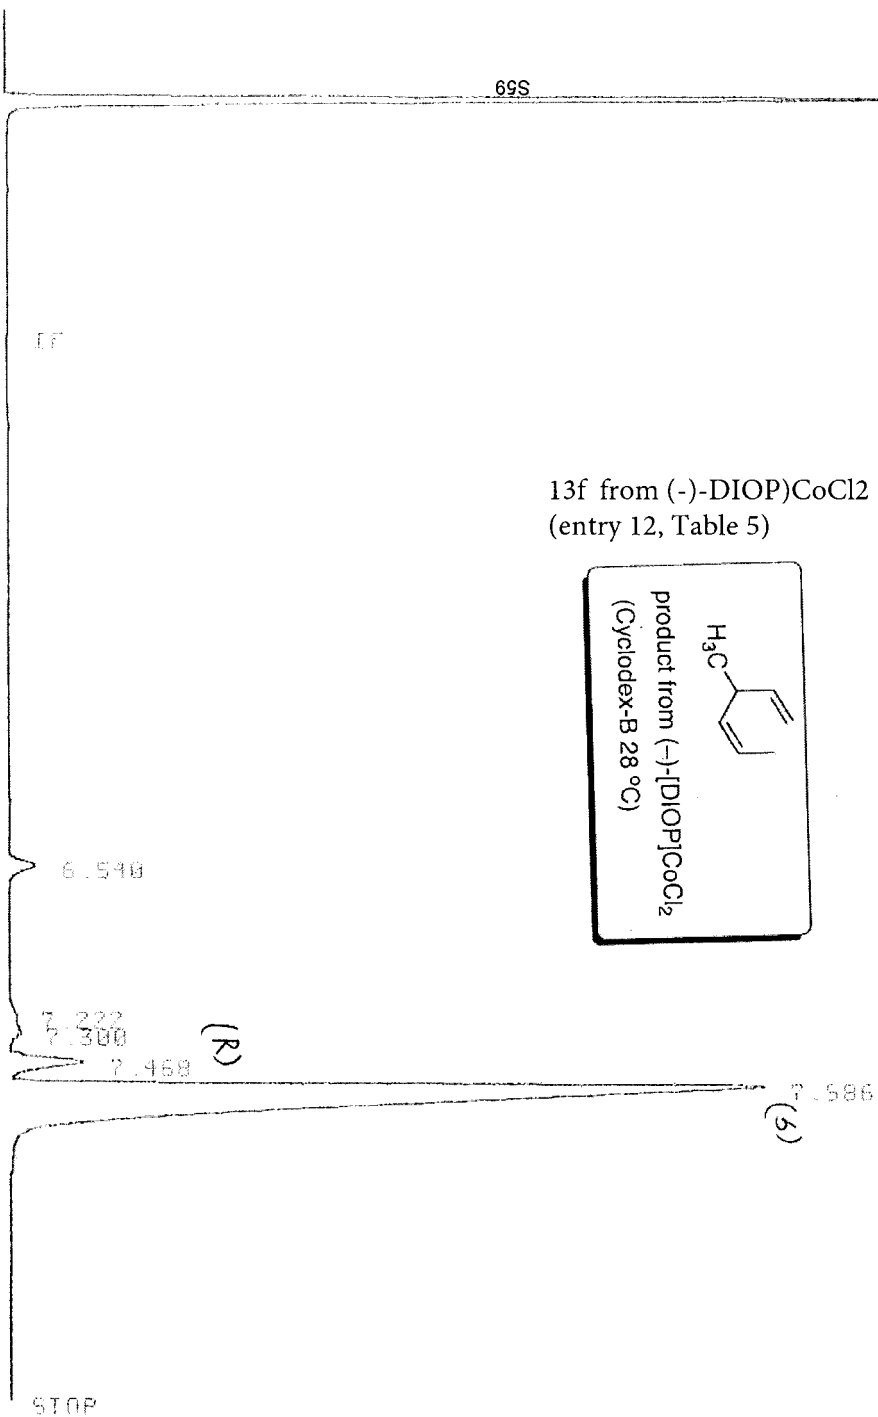

Closing signal file N:SIGNAL .BNA

RUN# 4168 NOV 30, 2009 22:19:01

SIGNAL FILE: N:SIGNAL BNA

AREA%

| RT    | AREA   | TYPE | WIDTH | AREA%    |
|-------|--------|------|-------|----------|
| 6.540 | 2895   | UP   | .059  | 1.83796  |
| 7.222 | 781    | PV   | .067  | .49584   |
| 7.300 | 1545   | UV   | .077  | .98880   |
| 7.468 | 7483   | UV   | .056  | 4.75075  |
| 7.586 | 144889 | UB   | .106  | 91.93459 |

TOTAL AREA= 157512  
MUL FACTOR=1.0000E+00

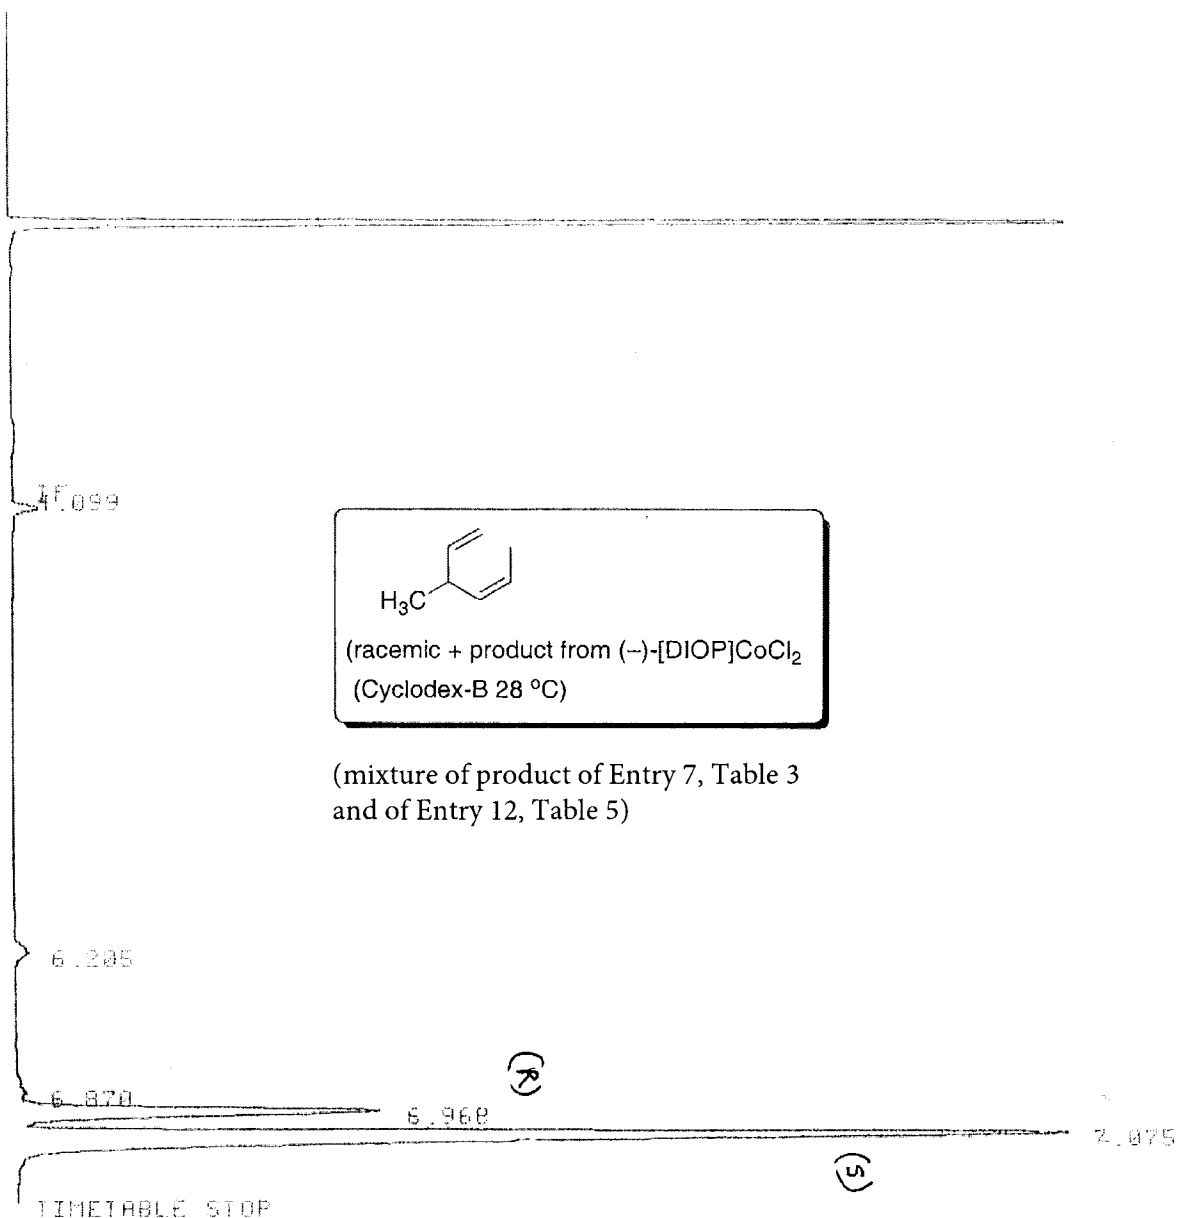

Closing signal file M:SIGNAL .BNA

RUN# 4169 DEC 1, 2009 01:16:06

SIGNAL FILE: M:SIGNAL.BNA

APERZ

| RT    | AREA  | TYPE | WIDTH | AREA%    |
|-------|-------|------|-------|----------|
| 4.099 | 901   | UU   | .036  | 1.28185  |
| 6.968 | 15622 | UU   | .047  | 22.22538 |
| 7.075 | 53766 | UB   | .056  | 76.49277 |

TOTAL AREA= 70289

MUL FACTOR=1.00000E+00

IF

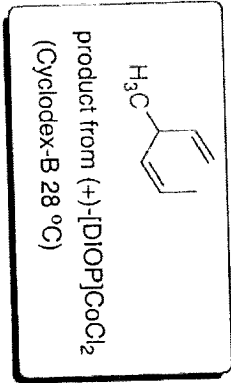

6.786

(R)

7.271

(S)

STOP

Closing signal file M:SIGNAL .BNA

RUN# 4170 DEC 2, 2009 01:00:00

SIGNAL FILE: M:SIGNAL.BNA

AREA#

| RT    | AREA   | TYPE | WIDTH | AREA%    |
|-------|--------|------|-------|----------|
| 6.786 | 1305   | PV   | .059  | .48171   |
| 6.943 | 254946 | UV   | .115  | 94.10726 |
| 7.271 | 14659  | UB   | .106  | 5.41102  |

TOTAL AREA= 270910  
MUL FACTOR=1.0000E+00

(82)

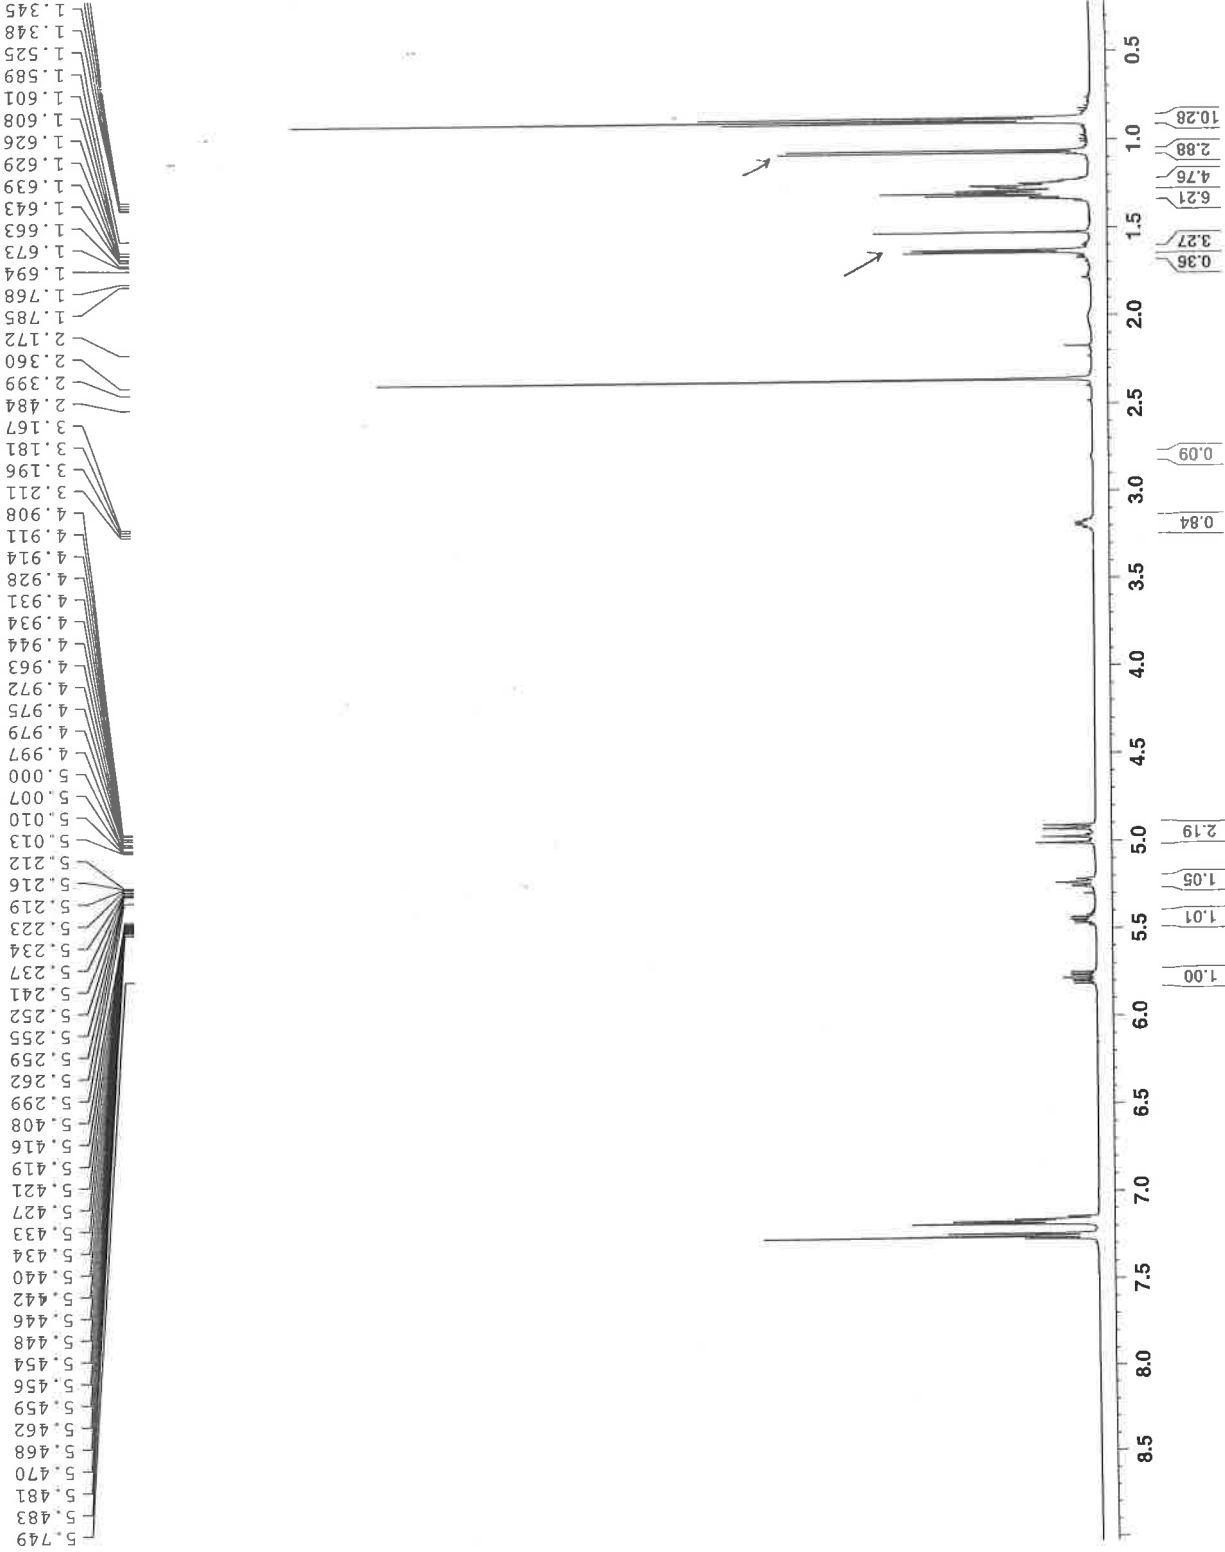

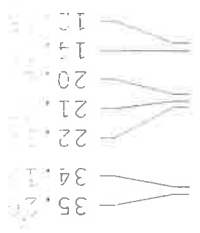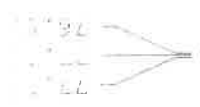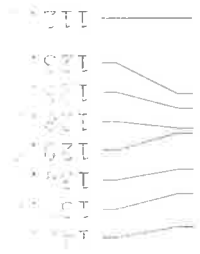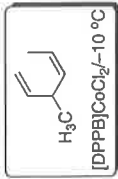

(with pentane and toluene)

△ PENTANE  
 ● TOLUENE  
 \* PRODUCT

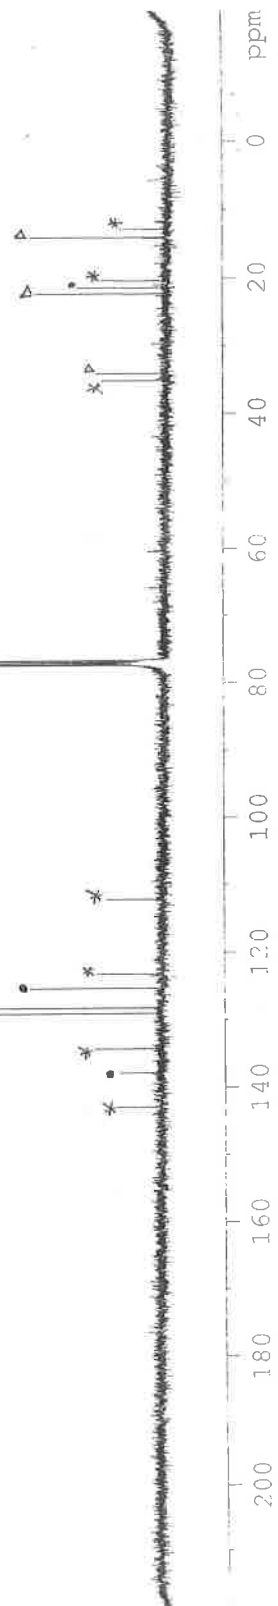

## Hydrovinylation of (*E*)-1-phenyl-1,3-butadiene

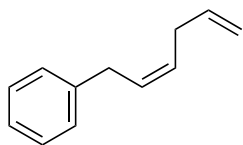

### Hydrovinylation of (*E*)-1-phenyl-1,3-butadiene using [dppp]CoCl<sub>2</sub>

(Table 3, Entry 8): To an oven dried round-bottom-flask with a sidearm, was added DPPPCoCl<sub>2</sub> (45 mg, 0.083 mmol) under argon and was dissolved in dichloromethane (1 mL) at room temperature.

Trimethylaluminium as a 2M solution in toluene (0.13 mL, 0.25 mmol) was added dropwise and the color of the solution changed from deep blue to red brown with the formation of white fumes over the solution. After 2 to 3 minutes, the reaction vessel was carefully evacuated and then refilled with ethylene from a balloon. The reaction vessel was cooled to -20 °C and (*E*)-1-phenyl-1,3-butadiene (108 mg, 0.83 mmol) as a dichloromethane solution (0.5 mL) was added under ethylene and the mixture was stirred for 4 h. The ethylene balloon was removed and 0.1 mL methanol was added to the flask. The solution was diluted with pentane (2 mL) and warmed to room temperature and subsequently passed through a silica plug. The plug was washed with pentane (3 x 5 mL). Removal of solvent yielded the product as a colorless oil (113 mg, 86%). GC and NMR analysis showed that the product was essentially pure linear adduct (**16g**). <sup>1</sup>H NMR (CDCl<sub>3</sub>, 500 MHz): 2.95-2.98 (m, 2 H), 3.45 (d, J = 7.5 Hz, 2 H), 5.06 (dq, J = 10, 1.5 Hz, 1 H), 5.13 (dq, J = 17, 1.5 Hz, 1 H), 5.56 - 5.62 (m, 1 H), 5.67 - 5.72 (m, 1 H), 5.89 (ddd, J = 6, 10, 17 Hz, 1 H), 7.21 - 7.23 (m, 3 H, aromatic), 7.31 - 7.34 (m, 2 H, aromatic). <sup>13</sup>C NMR (CDCl<sub>3</sub>, 125.02 MHz): 31.74, 33.66, 115.14, 126.12, 127.86, 128.58, 128.64, 129.53, 136.91, 141.07. Gas Chromatography: CSP GC (Cyclosil, OT 100 °C/ isothermal, H<sub>2</sub> carrier gas). Starting material R<sub>T</sub> = 17.68 min. R<sub>T</sub> for achiral linear product = 32.58 min.

This following table shows the additional experiments conducted with this diene, 1-phenyl-1,3-butadiene, employing 10 mol % catalyst (see Table 3 in the paper for details).

| Entry | Catalyst                               | Tem(°C) /Time(h) | Activator | Conv.(%)  | Product                                   |
|-------|----------------------------------------|------------------|-----------|-----------|-------------------------------------------|
| 1.    | DPPMCoCl <sub>2</sub>                  | -20/7            | TMA       | 100       | 1,2-HV                                    |
| 2.    | DPPECoCl <sub>2</sub>                  | -10/3.5          | TMA       | 89        | 1,4-linear                                |
| 3.    | DPPPCoCl <sub>2</sub>                  | -20/4            | TMA       | 97        | 1,4-linear                                |
| 4.    | DPPBCoCl <sub>2</sub>                  | -10/6            | TMA       | 87        | 1,4-linear                                |
| 5.    | ( <i>S,S</i> )-[DIOP]CoCl <sub>2</sub> | 0-rt/5           | MAO       | 97        | 1,4-linear (54%)+<br>1,2-HV (43%, 52% ee) |
| 6.    | [DIOP]CoCl <sub>2</sub>                | -40/8            | TMA       | 45        | 1,4-linear (40%)<br>+1,2-HV(4%)           |
| 7.    | ( <i>SS</i> )-[BDPP]CoCl <sub>2</sub>  | -20/11           | TMA       | 95(70+16) | 1,2-HV+1,4 linear<br>(ee not determined)  |
| 8.    | DIPAMP                                 | -12/11           | TMA       | 6         | 1,4-linear                                |
| 9.    | DPPPCoCl <sub>2</sub>                  | -40/8            | TMA       | 8         | 1,4-linear                                |



```

=====
Acq. Operator   : yam                               Seq. Line :    1
Acq. Instrument : Babu                             Location  : Vial 201
Injection Date  : 10/17/2012 11:52:47 AM          Inj       :    1
                                                    Inj Volume: 1 µl
Different Inj Volume from Sequence ! Actual Inj Volume : 5 µl
Sequence File   : C:\Chem32\1\DATA\YAM\YT-1-CHIRAL 2012-10-17 11-51-48\YT-1-CHIRAL.S
Method          : C:\CHEM32\1\DATA\YAM\YT-1-CHIRAL 2012-10-17 11-51-48\YT_85_C_CHIRAL.M (
                  Sequence Method)
Last changed    : 10/17/2012 11:00:05 AM by yam
  
```

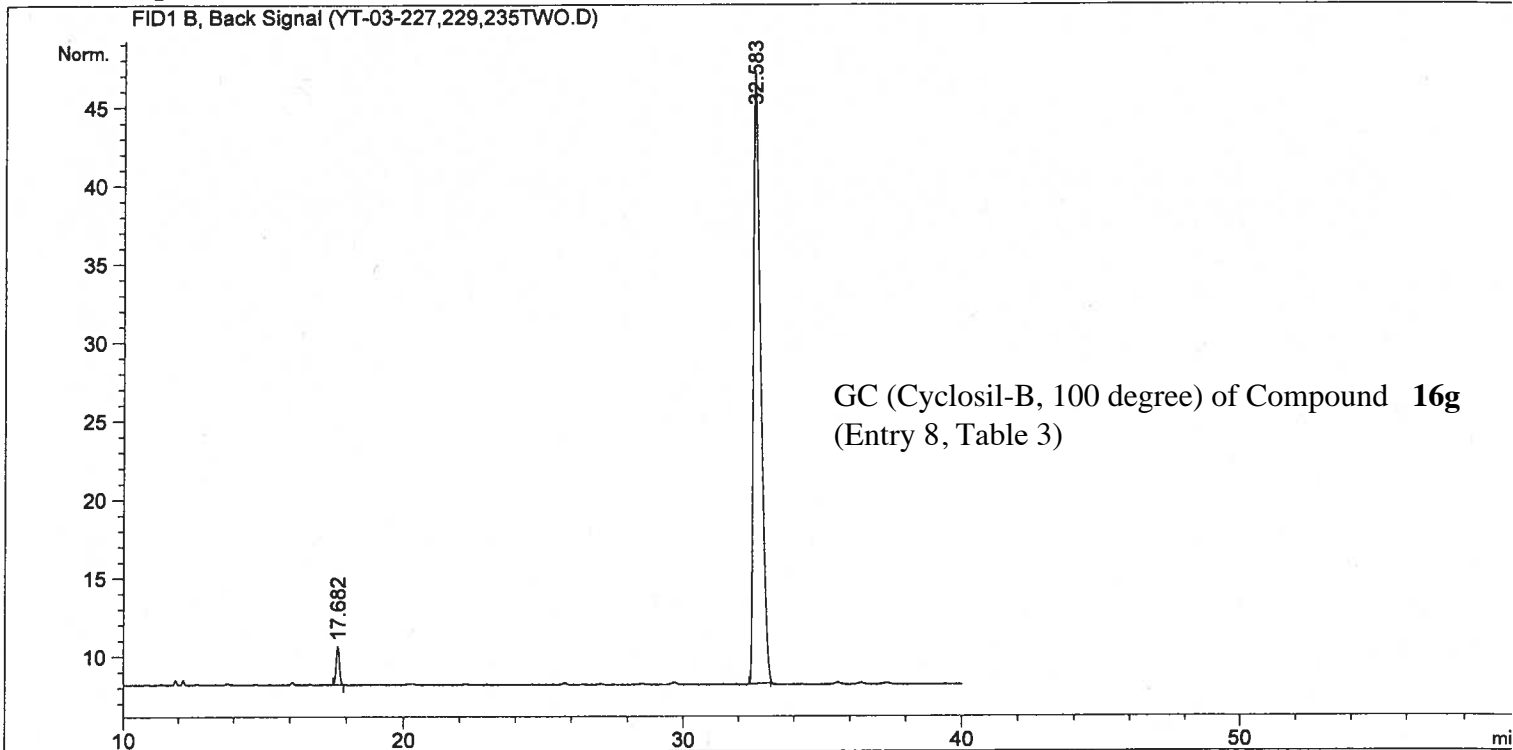

=====  
 Area Percent Report  
 =====

```

Sorted By      :      Signal
Multiplier:    :      1.0000
Dilution:      :      1.0000
Use Multiplier & Dilution Factor with ISTDs
  
```

Signal 1: FID1 B, Back Signal

| Peak # | RetTime [min] | Type | Width [min] | Area [pA*s] | Height [pA] | Area %   |
|--------|---------------|------|-------------|-------------|-------------|----------|
| 1      | 6.254         | BB   | 0.0479      | 1.72123     | 5.71427e-1  | 0.23561  |
| 2      | 17.682        | BB   | 0.1231      | 19.35352    | 2.43581     | 2.64916  |
| 3      | 32.583        | BB   | 0.2413      | 709.47870   | 38.95836    | 97.11524 |

Totals :                                730.55345    41.96559

=====  
 \*\*\* End of Report \*\*\*

Proton NMR (500 MHz, D-Chloroform) spectrum of compound **16g** (HV using Cl<sub>2</sub>Co(DPPP)] (Entry 8, Table 3)

Ⓞ ✓  
dpppCoCl<sub>2</sub>/TMA

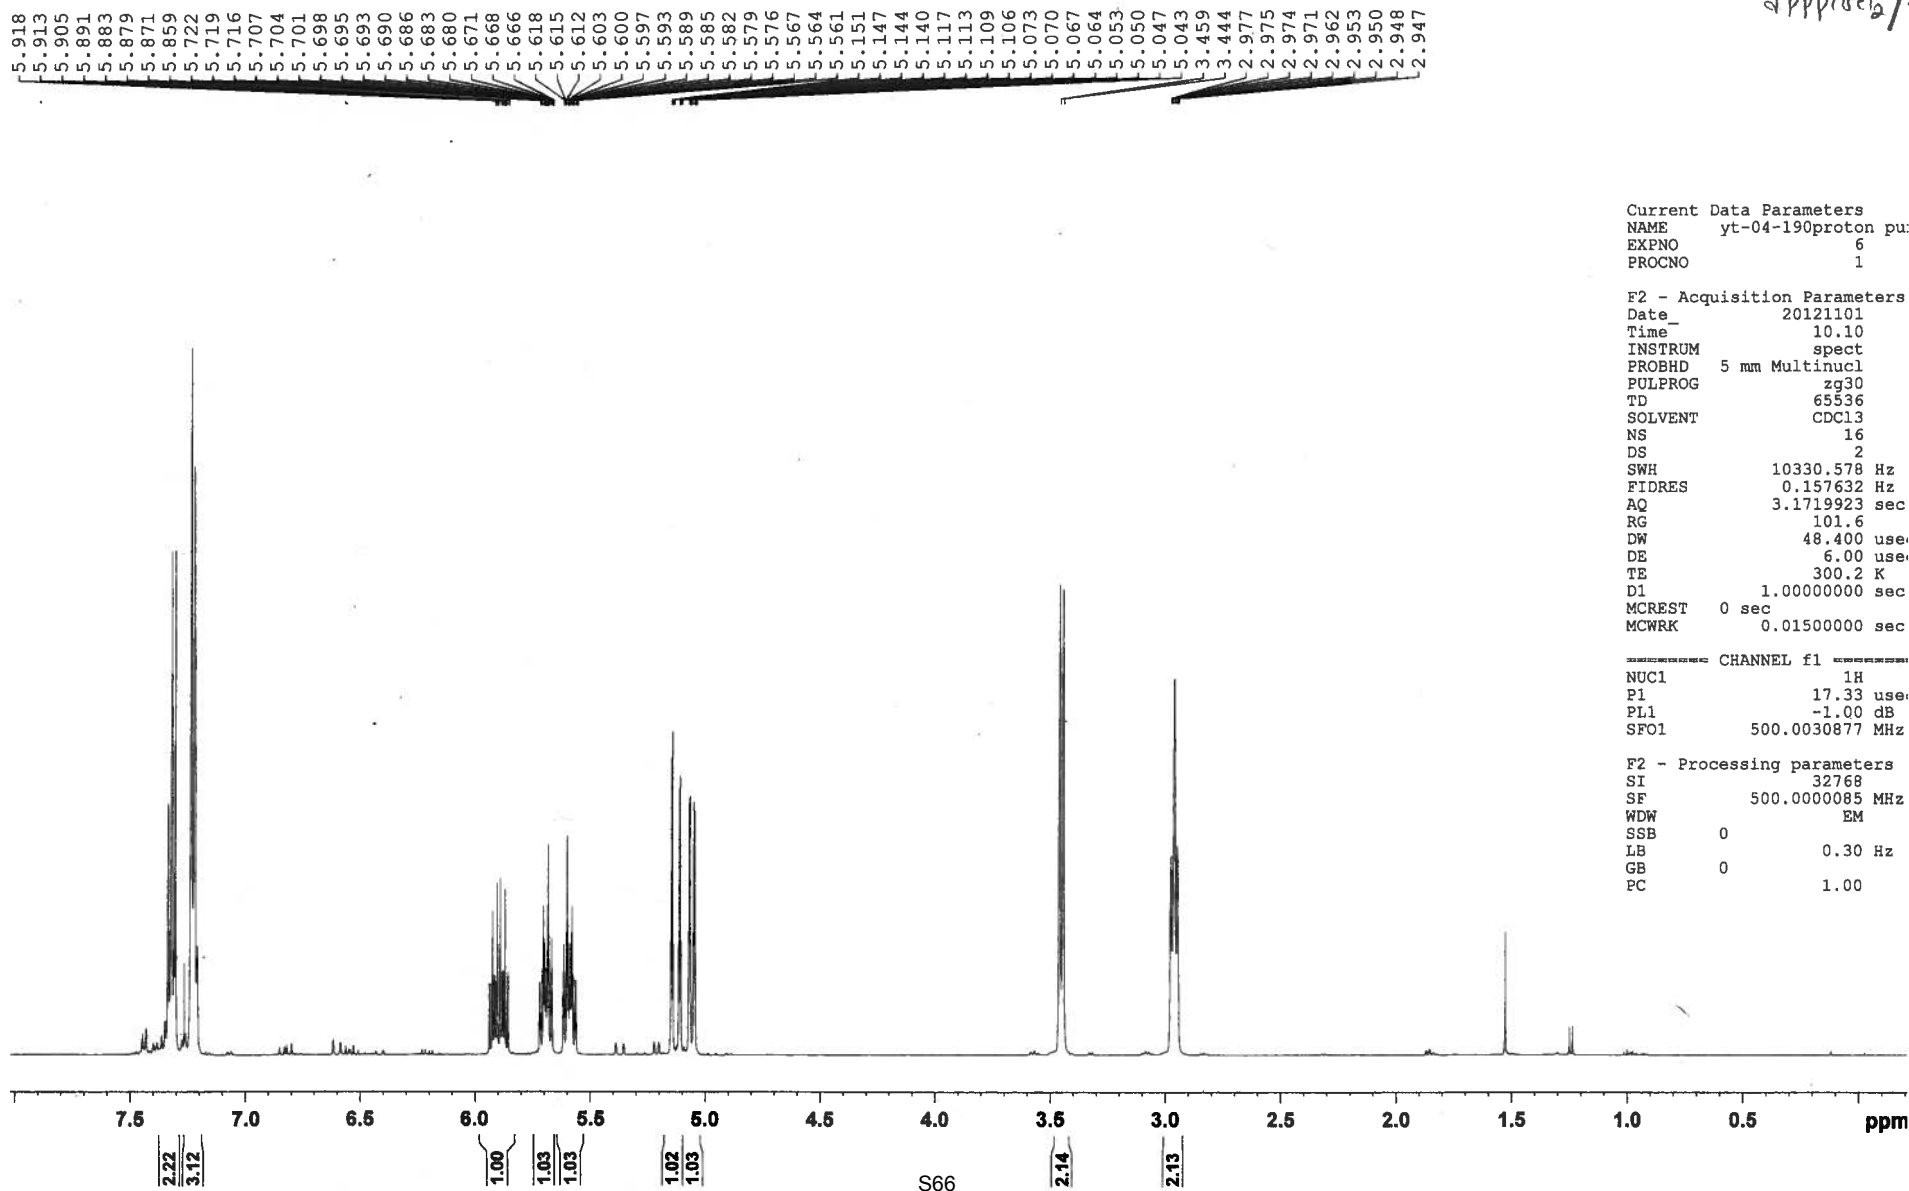

Current Data Parameters  
NAME yt-04-190proton pu  
EXPNO 6  
PROCNO 1

F2 - Acquisition Parameters  
Date\_ 20121101  
Time 10.10  
INSTRUM spect  
PROBHD 5 mm Multinucl  
PULPROG zg30  
TD 65536  
SOLVENT CDCl<sub>3</sub>  
NS 16  
DS 2  
SWH 10330.578 Hz  
FIDRES 0.157632 Hz  
AQ 3.1719923 sec  
RG 101.6  
DW 48.400 usec  
DE 6.00 usec  
TE 300.2 K  
D1 1.00000000 sec  
MCREST 0 sec  
MCWRK 0.01500000 sec

----- CHANNEL f1 -----  
NUC1 1H  
P1 17.33 usec  
PL1 -1.00 dB  
SFO1 500.0030877 MHz

F2 - Processing parameters  
SI 32768  
SF 500.0000085 MHz  
WDW EM  
SSB 0  
LB 0.30 Hz  
GB 0  
PC 1.00

Proton NMR (500 MHz, D-Chloroform) spectrum of compound **16g** (HV using Cl<sub>2</sub>Co(DPPP)]( Alkene Expansion)

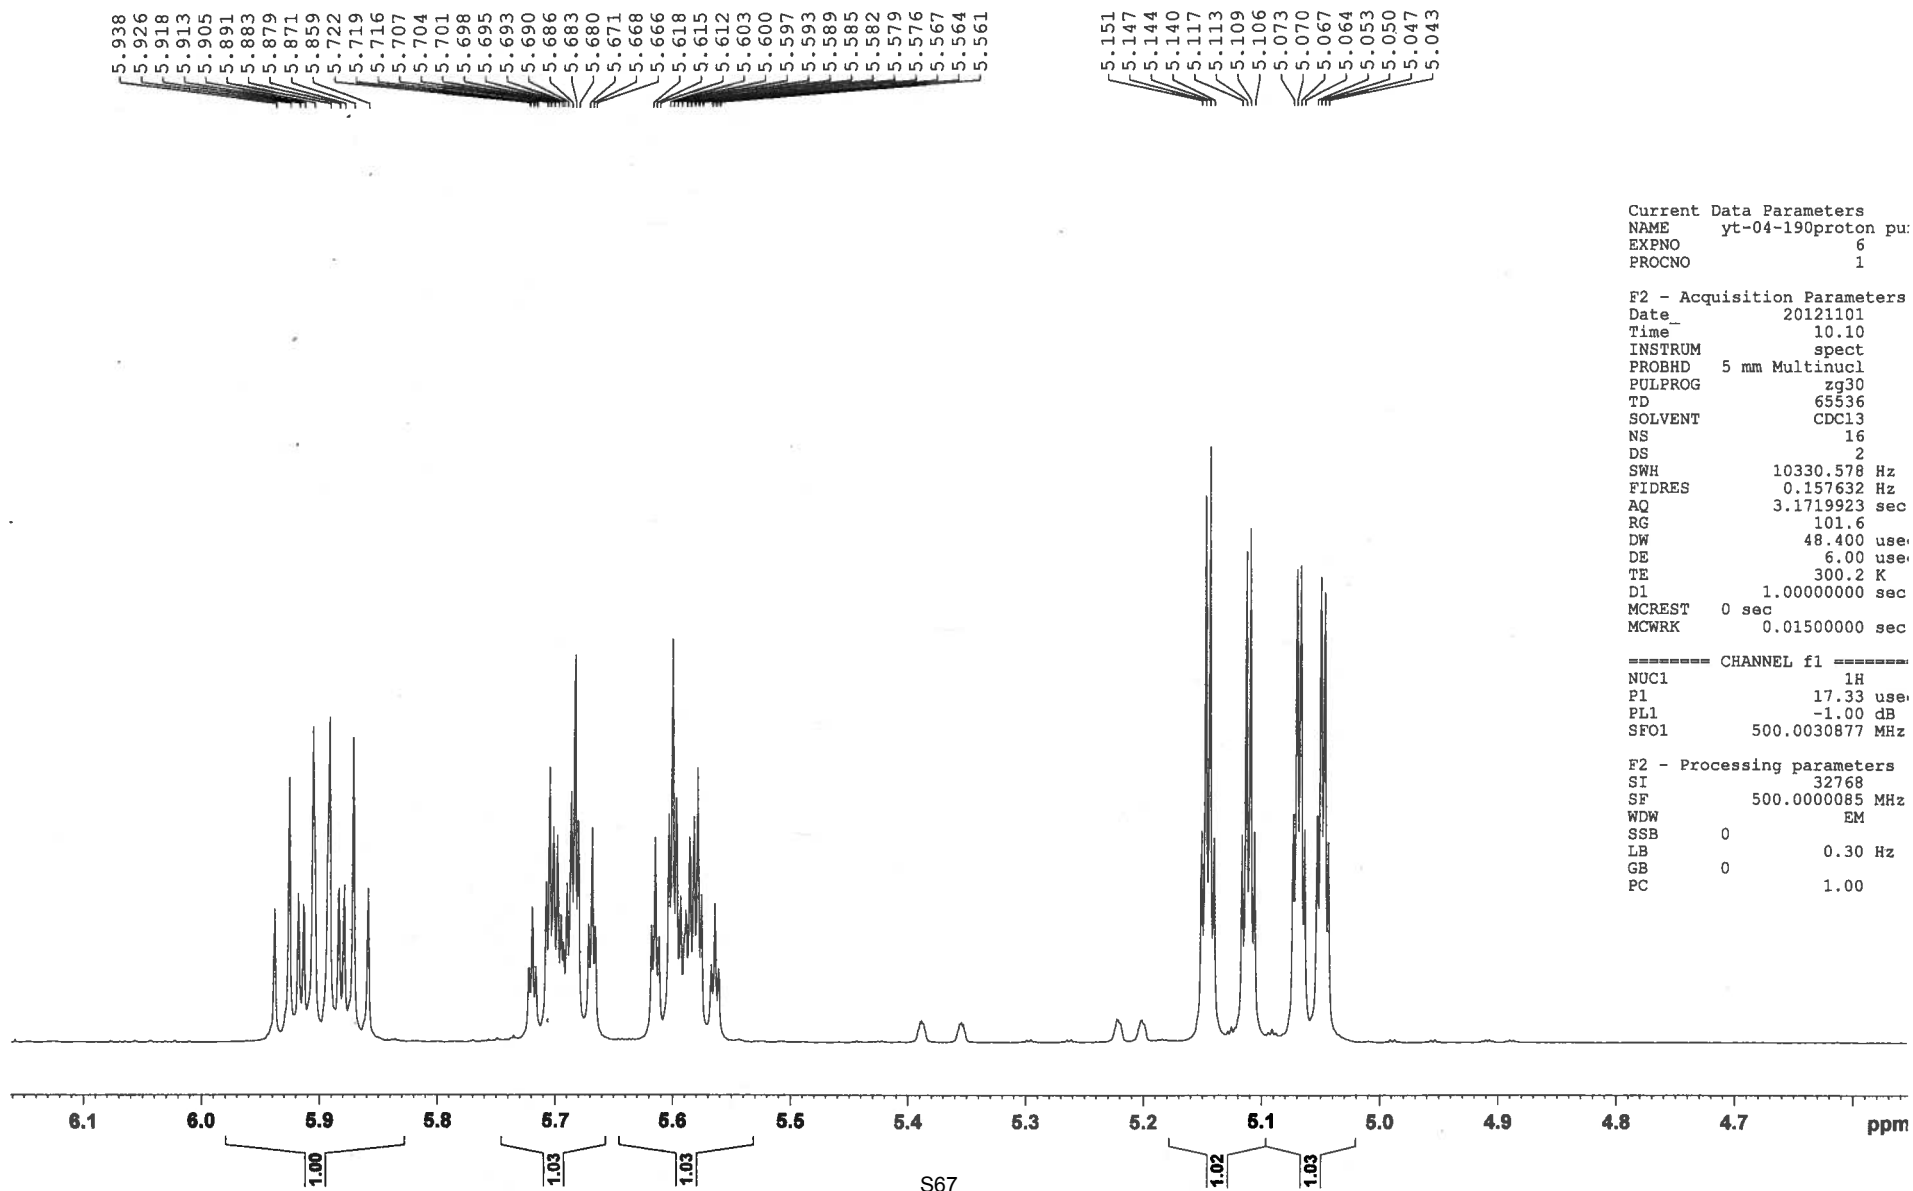

Current Data Parameters  
 NAME yt-04-190proton pu  
 EXPNO 6  
 PROCNO 1

F2 - Acquisition Parameters  
 Date\_ 20121101  
 Time 10.10  
 INSTRUM spect  
 PROBHD 5 mm Multinucl  
 PULPROG zg30  
 TD 65536  
 SOLVENT CDCl3  
 NS 16  
 DS 2  
 SWH 10330.578 Hz  
 FIDRES 0.157632 Hz  
 AQ 3.1719923 sec  
 RG 101.6  
 DW 48.400 usec  
 DE 6.00 usec  
 TE 300.2 K  
 D1 1.00000000 sec  
 MCREST 0 sec  
 MCWRK 0.01500000 sec

===== CHANNEL f1 =====  
 NUC1 1H  
 P1 17.33 usec  
 PL1 -1.00 dB  
 SFO1 500.0030877 MHz

F2 - Processing parameters  
 SI 32768  
 SF 500.0000085 MHz  
 WDW EM  
 SSB 0  
 LB 0.30 Hz  
 GB 0  
 PC 1.00

Carbon NMR (500 MHz, D-Chloroform) spectrum of compound **16g** (HV using Cl<sub>2</sub>Co(DPPP))

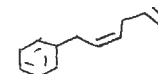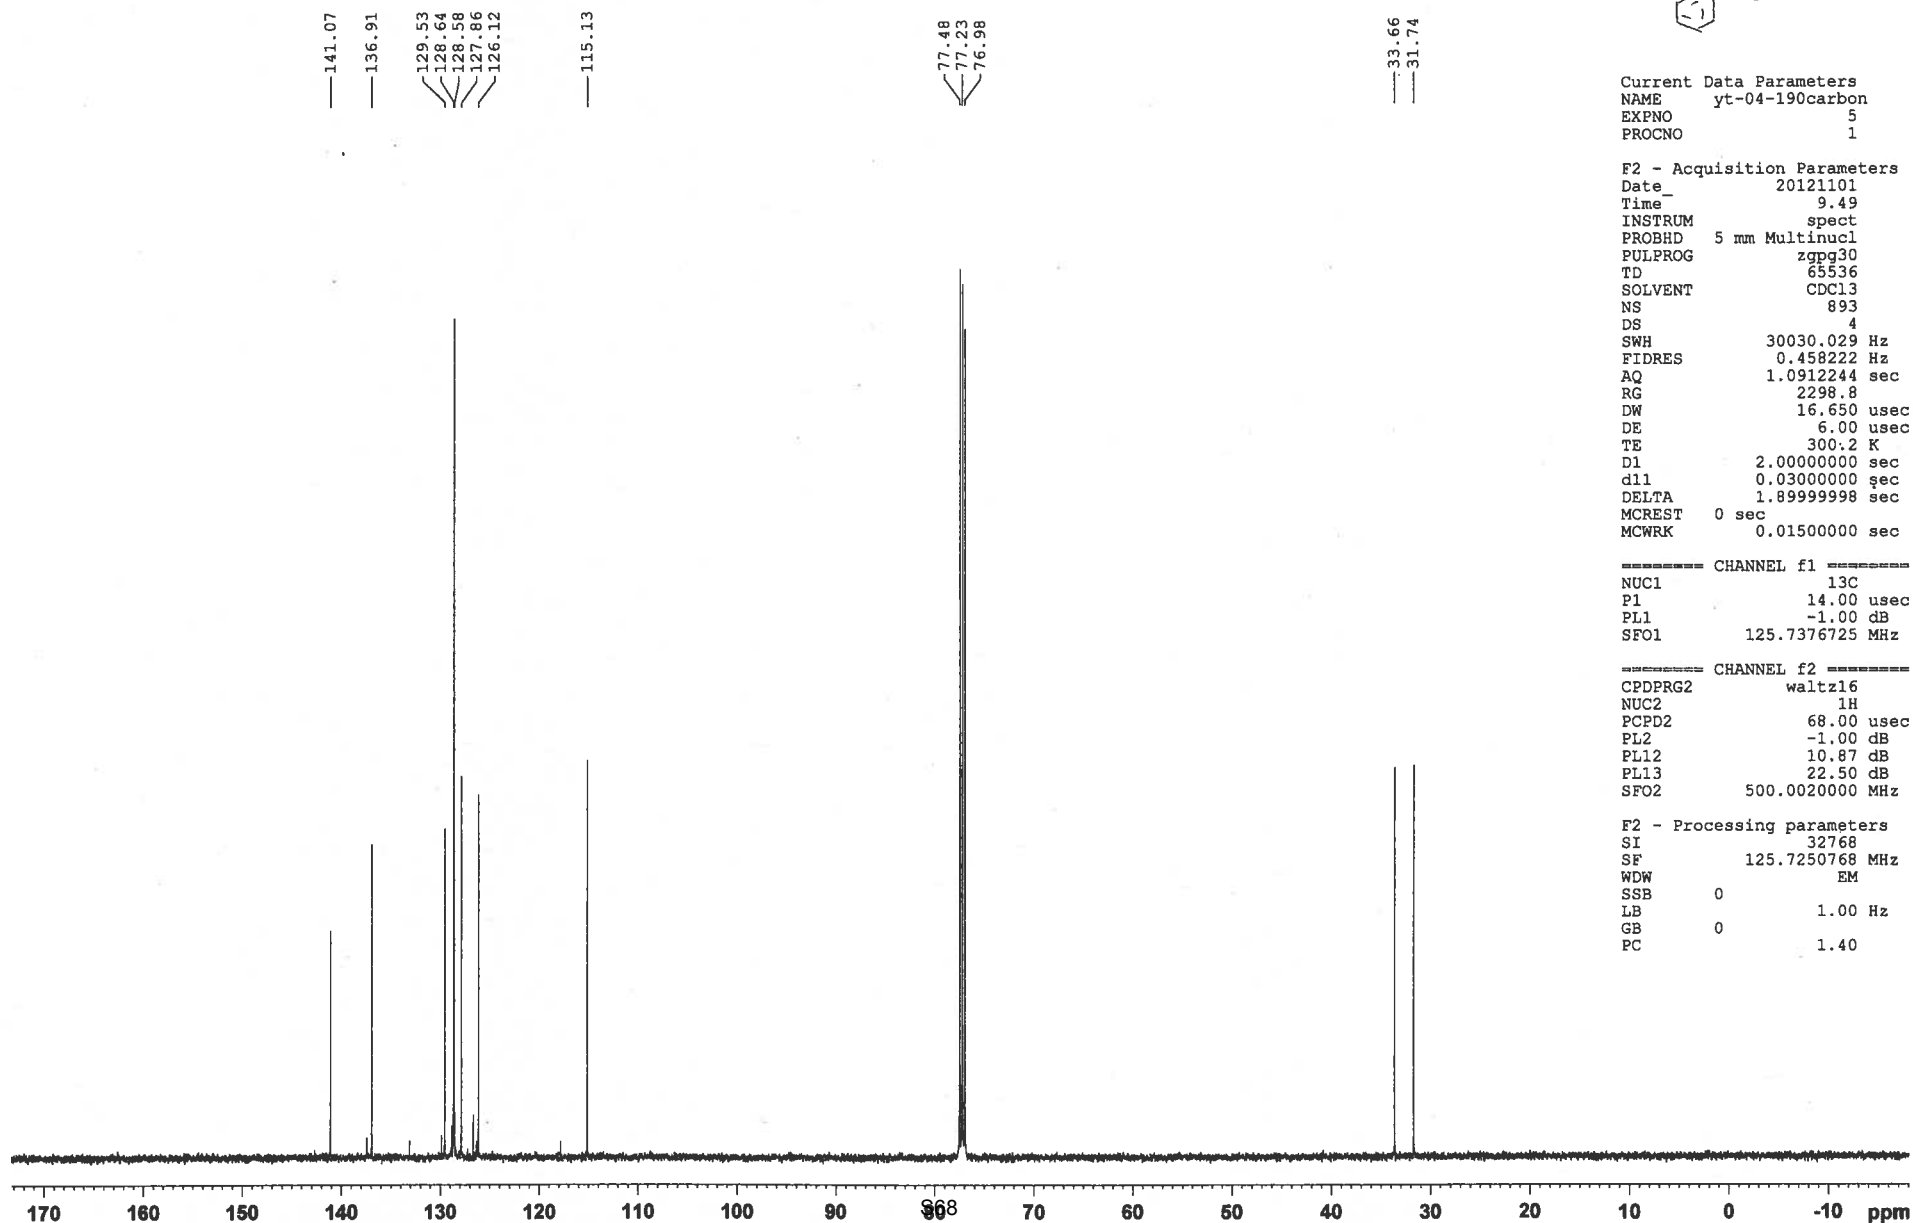

Current Data Parameters  
 NAME yt-04-190carbon  
 EXPNO 5  
 PROCNO 1

F2 - Acquisition Parameters  
 Date\_ 20121101  
 Time\_ 9.49  
 INSTRUM spect  
 PROBHD 5 mm Multinucl  
 PULPROG zgpg30  
 TD 65536  
 SOLVENT CDCl3  
 NS 893  
 DS 4  
 SWH 30030.029 Hz  
 FIDRES 0.458222 Hz  
 AQ 1.0912244 sec  
 RG 2298.8  
 DW 16.650 usec  
 DE 6.00 usec  
 TE 300.2 K  
 D1 2.0000000 sec  
 d11 0.03000000 sec  
 DELTA 1.89999998 sec  
 MCREST 0 sec  
 MCWRK 0.01500000 sec

===== CHANNEL f1 =====  
 NUC1 13C  
 P1 14.00 usec  
 PL1 -1.00 dB  
 SFO1 125.7376725 MHz

===== CHANNEL f2 =====  
 CPDPRG2 waltz16  
 NUC2 1H  
 PCPD2 68.00 usec  
 PL2 -1.00 dB  
 PL12 10.87 dB  
 PL13 22.50 dB  
 SFO2 500.0020000 MHz

F2 - Processing parameters  
 SI 32768  
 SF 125.7250768 MHz  
 WDW EM  
 SSB 0  
 LB 1.00 Hz  
 GB 0  
 PC 1.40

**Hydrovinylation of (*E*)-1-phenyl-1,3-butadiene using [dppm]CoCl<sub>2</sub> (Table 3, Entry 10):**

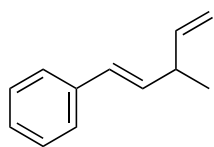

To an oven dried round-bottom-flask with a sidearm, was added DPPMCoCl<sub>2</sub> (34 mg, 0.066 mmol) and under argon it was dissolved in dichloromethane (1 mL) at room temperature. Trimethylaluminium as a 2M solution in toluene (0.1 mL, 0.20 mmol) was added dropwise and the color of the solution changed from bluish brown to red brown with the formation of white fumes over the solution. After 2 to 3 minutes, the reaction vessel was carefully evacuated and then refilled with ethylene from a balloon. The reaction vessel was cooled to -20 °C and (*E*)-1-phenyl-1,3-butadiene (86 mg, 0.66 mmol) in dichloromethane (1 mL) added under ethylene and the mixture was stirred for 7 h. The ethylene balloon was removed and 0.1 mL methanol was added to the flask. The solution was diluted with pentane (2 mL) and warmed to room temperature and subsequently passed through a silica plug. The plug was washed with pentane (3 X 5 mL). Removal of solvent yielded the product as colorless oil (83 mg, 80%). GC and NMR analysis showed that the product was essentially pure 1,2 hydrovinylation product (**15g**). <sup>1</sup>H NMR (CDCl<sub>3</sub>, 500 MHz): 1.19 (d, J = 7 Hz, 3 H), 2.99 – 3.05 (m, 1 H), 4.99 – 5.08 (m, 2 H), 5.87 (ddd, J = 6.5, 10, 17 Hz, 1 H), 6.17 (dd, J = 7, 16 Hz, 1 H), 6.37 (d, J = 16 Hz, 1 H), 7.18 – 7.36 (m, aromatic, 5 H). <sup>13</sup>C NMR (CDCl<sub>3</sub>, 125.02 MHz): 20.00, 40.85, 113.54, 126.28, 127.20, 128.69, 128.86, 134.47, 137.86, 142.64. Gas Chromatography: CSP GC (Cyclosil, OT 120 °C/ isothermal, H<sub>2</sub> carrier gas) R<sub>T</sub> for chiral 1,2 product = 14.34 and 14.58 min (enantiomers, racemic), (*SS*)-DIOP gave 52% ee with 43% yield. Methylsilicone SP GC (OT 120 °C/ isothermal, He carrier gas) R<sub>t</sub> for chiral 1,2 product = 10.56 min.

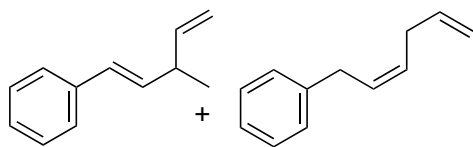

**Hydrovinylation of (*E*)-1-phenyl-1,3-butadiene using (*S,S*)[DIOP]CoCl<sub>2</sub> (Table 5, Entry 13):**

To an oven dried round bottom flask with a sidearm, was added (*S,S*)[DIOP]CoCl<sub>2</sub> (24 mg, 0.038 mmol) and methylaluminoxane (44 mg, 0.76 mmol) under argon.

The color of the solution changed from deep blue to red brown with the formation of white fumes over the addition of dichloromethane solvent (1.5 mL) at room temperature. After 2 to 3 minutes when fumes stopped, the reaction vessel was carefully evacuated and then refilled with ethylene balloon. The reaction vessel was cooled to 0 °C and (*E*)-1-phenyl-1,3-butadiene (49 mg, 0.38 mmol) in dichloromethane (1 mL) was added via syringe under ethylene and the mixture was stirred for 5 h in ambient temperature until the completion of reaction monitored via gas chromatography. The ethylene balloon was removed and 0.1 mL methanol was added into the flask. The reaction solution was diluted with pentane (5 mL) and warmed to room temperature and subsequently passed through a silica plug. The plug was washed with pentane (3 X 10 mL). Removal of the solvent yielded the product as colorless oil as a mixture of two major isomers **15g** (43% with 54% ee) and **16g** (55%) (Table 5, Entry 13). GC and NMR analysis showed that the products were essentially pure and the spectra and chromatogram are attached.

\*  
\*  
\*  
\*  
\*  
\*  
\*  
\*  
\*  
\*  
\*  
\*  
\*  
\*  
\*  
\*

↓PpMCoCl<sub>2</sub>/TMA  
YT-04-220RR  
OT 120°C / iso / achiral

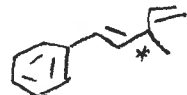

\* RUN # 236      MAR 20, 1901    01:38:14

START

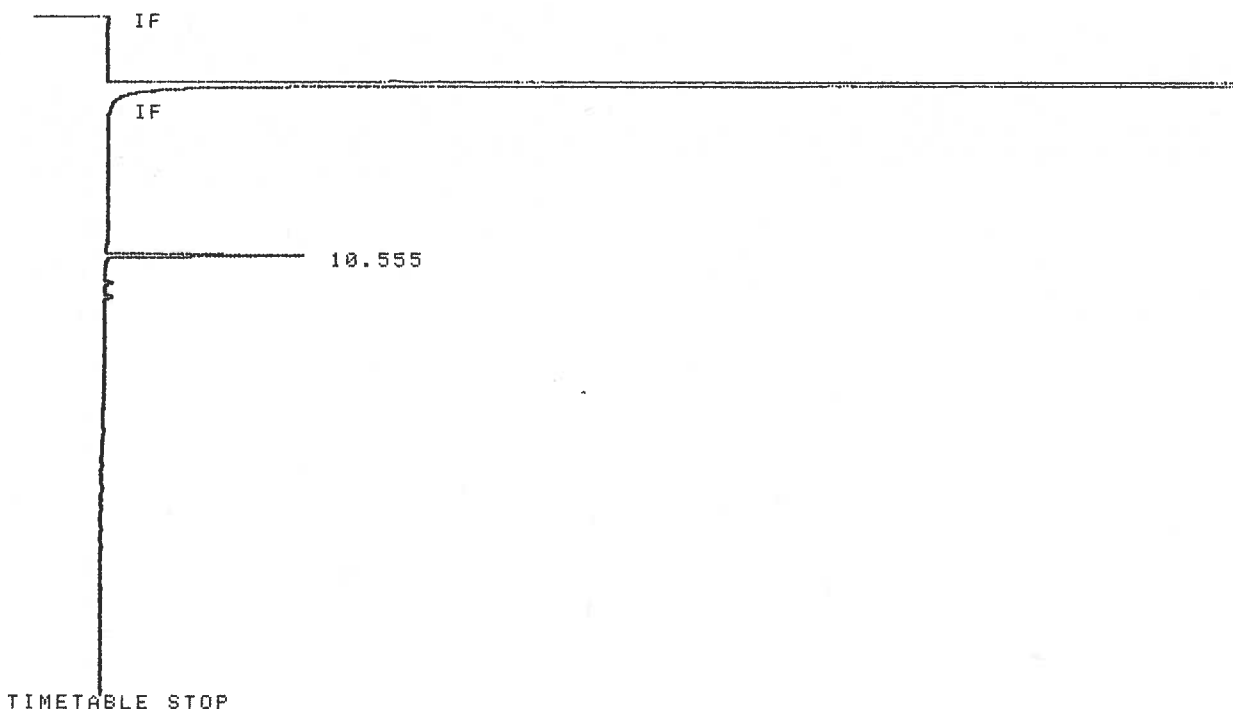

RUN# 236      MAR 20, 1901    01:38:14

AREA%

| RT     | AREA  | TYPE | WIDTH | AREA%     |
|--------|-------|------|-------|-----------|
| 10.555 | 65242 | BB   | .096  | 100.00000 |

TOTAL AREA= 65242  
MUL FACTOR=1.0000E+00

GC (HP-5 Methyl silicone, 120 degree) of racemic Compound **15g** (HV Using Cl<sub>2</sub>Co(DPPM))  
(Entry 10, Table 3)

\*  
\*  
\*  
\*  
\*

```

=====
Acq. Operator   : YAM                               Seq. Line :    1
Acq. Instrument : Babu                             Location  : Vial 201
Injection Date  : 1/30/2013 9:50:07 AM           Inj       :    1
                                                    Inj Volume: 1 µl
Different Inj Volume from Sequence !      Actual Inj Volume : 3 µl
Acq. Method     : C:\CHEM32\1\DATA\YAM\YT-1-CHIRAL 2013-01-30 09-48-53\YT_85_C_CHIRAL.M
Last changed    : 1/30/2013 9:48:53 AM by YAM
Analysis Method : C:\CHEM32\1\METHODS\YT_85_C_CHIRAL.M
Last changed    : 1/30/2013 10:37:42 AM by YAM
                  (modified after loading)
=====
  
```

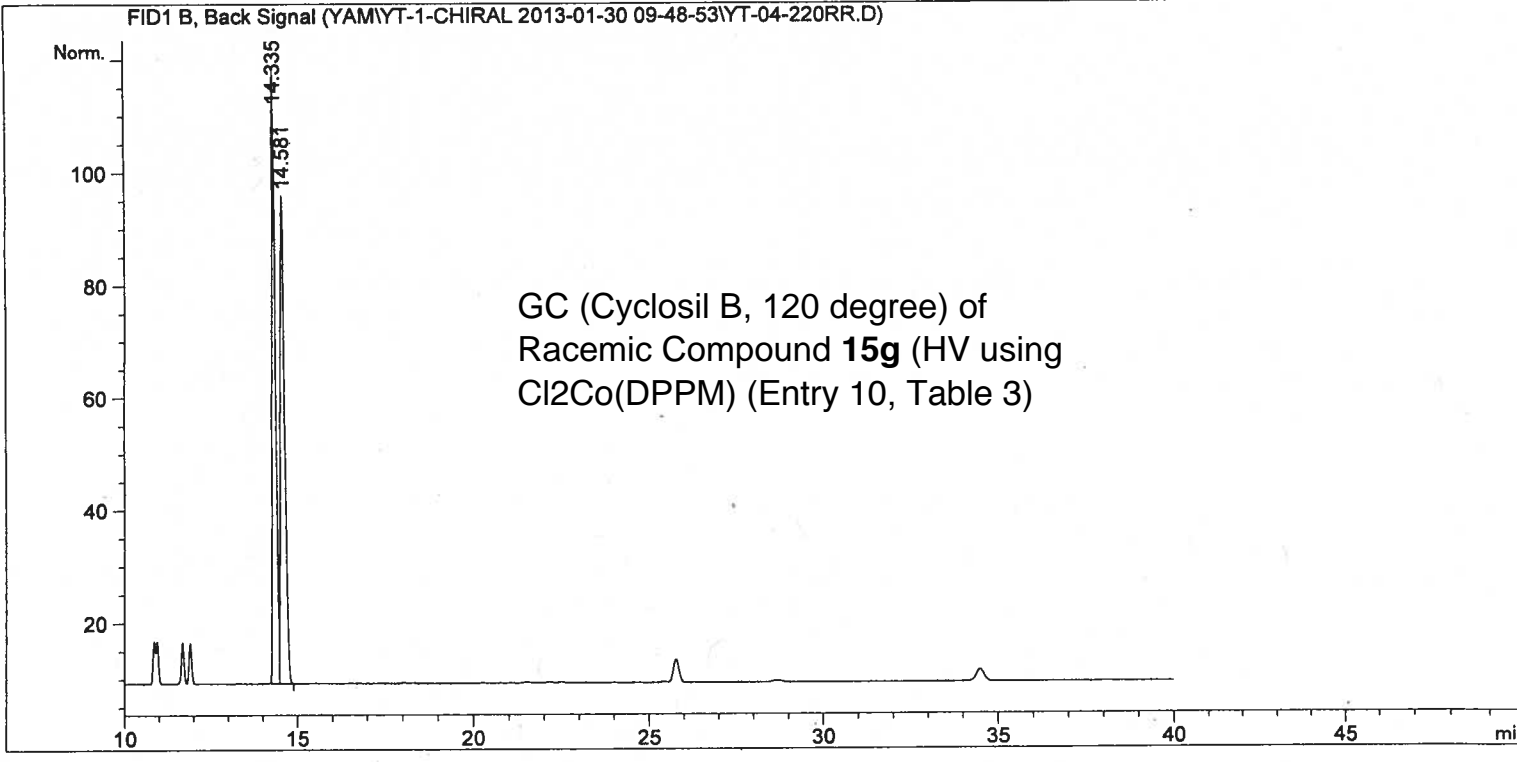

=====  
 Area Percent Report  
 =====

```

Sorted By      :      Signal
Multiplier:    :      1.0000
Dilution:      :      1.0000
Use Multiplier & Dilution Factor with ISTDs
  
```

Signal 1: FID1 B, Back Signal

| Peak # | RetTime [min] | Type | Width [min] | Area [pA*s] | Height [pA] | Area %   |
|--------|---------------|------|-------------|-------------|-------------|----------|
| 1      | 14.335        | BV   | 0.1027      | 747.93854   | 108.62716   | 49.76770 |
| 2      | 14.581        | VB   | 0.1288      | 754.92090   | 86.67773    | 50.23230 |

Totals :                                    1502.85944    195.30489

=====  
 \*\*\* End of Report \*\*\*

```

=====
Acq. Operator   : YAM                      Seq. Line :    1
Acq. Instrument : Babu                    Location  : Vial 201
Injection Date  : 10/12/2012 4:56:56 PM   Inj       :    1
                                           Inj Volume: 1 µl
Different Inj Volume from Sequence !      Actual Inj Volume : 5 µl
Sequence File   : C:\Chem32\1\DATA\YAM\YT-1-CHIRAL 2012-10-12 16-55-52\YT-1-CHIRAL.S
Method          : C:\CHEM32\1\DATA\YAM\YT-1-CHIRAL 2012-10-12 16-55-52\YT_85_C_CHIRAL.M (
                  Sequence Method)
Last changed    : 10/12/2012 3:42:07 PM by YAM
  
```

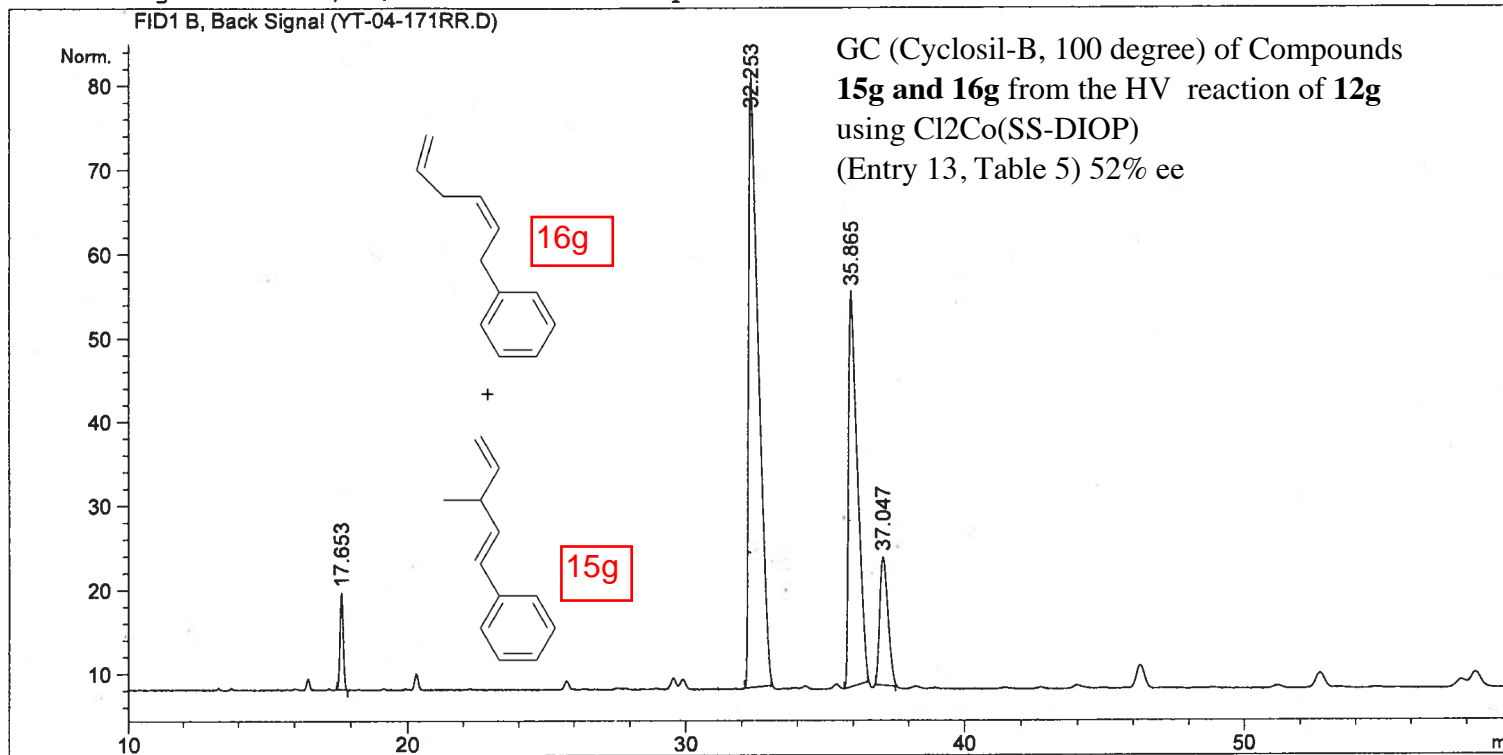

Area Percent Report

```

Sorted By      :      Signal
Multiplier:    :      1.0000
Dilution:      :      1.0000
Use Multiplier & Dilution Factor with ISTDs
  
```

Signal 1: FID1 B, Back Signal

| Peak # | RetTime [min] | Type | Width [min] | Area [pA*s] | Height [pA] | Area %   |
|--------|---------------|------|-------------|-------------|-------------|----------|
| 1      | 17.653        | BB   | 0.1264      | 91.76698    | 11.54052    | 2.85662  |
| 2      | 32.253        | BB   | 0.3078      | 1760.57617  | 72.79673    | 54.80507 |
| 3      | 35.865        | BB   | 0.2973      | 1046.50647  | 47.14975    | 32.57676 |
| 4      | 37.047        | BB   | 0.2925      | 313.58331   | 15.26240    | 9.76155  |

Totals : 3212.43293 146.74941



Current Data Parameters  
 NAME yt-04-220rrpro  
 EXPNO 9  
 PROCNO 1

F2 - Acquisition Parameters  
 Date 20121223  
 Time 18.20  
 INSTRUM spect  
 PROBHD 5 mm Multinucl  
 PULPROG zg30  
 TD 65536  
 SOLVENT CDCl3  
 NS 16  
 DS 2  
 SWH 10330.578 Hz  
 FIDRES 0.157632 Hz  
 AQ 3.1719923 sec  
 RG 161.3  
 DW 48.400 usec  
 DE 6.00 usec  
 TE 683.2 K  
 D1 1.00000000 sec  
 MCREST 0 sec  
 MCWRK 0.01500000 sec

===== CHANNEL f1 =====  
 NUC1 1H  
 P1 17.33 usec  
 PL1 -1.00 dB  
 SFO1 500.0030877 MHz

F2 - Processing parameters  
 SI 32768  
 SF 500.0000225 MHz  
 WDW EM  
 SSB 0  
 LB 0.30 Hz  
 GB 0  
 PC 1.00

7.361  
7.359  
7.345  
7.302  
7.297  
7.287  
7.271  
7.208  
7.205  
7.191  
7.179  
7.177  
6.389  
6.357  
6.190  
6.176  
6.158  
6.144  
5.899  
5.886  
5.879  
5.865  
5.851  
5.844  
5.831  
5.083  
5.081  
5.078  
5.049  
5.046  
5.043  
5.025  
5.023  
5.004  
5.002  
4.999

3.054  
3.040  
3.027  
3.013  
2.999

1.204  
1.190

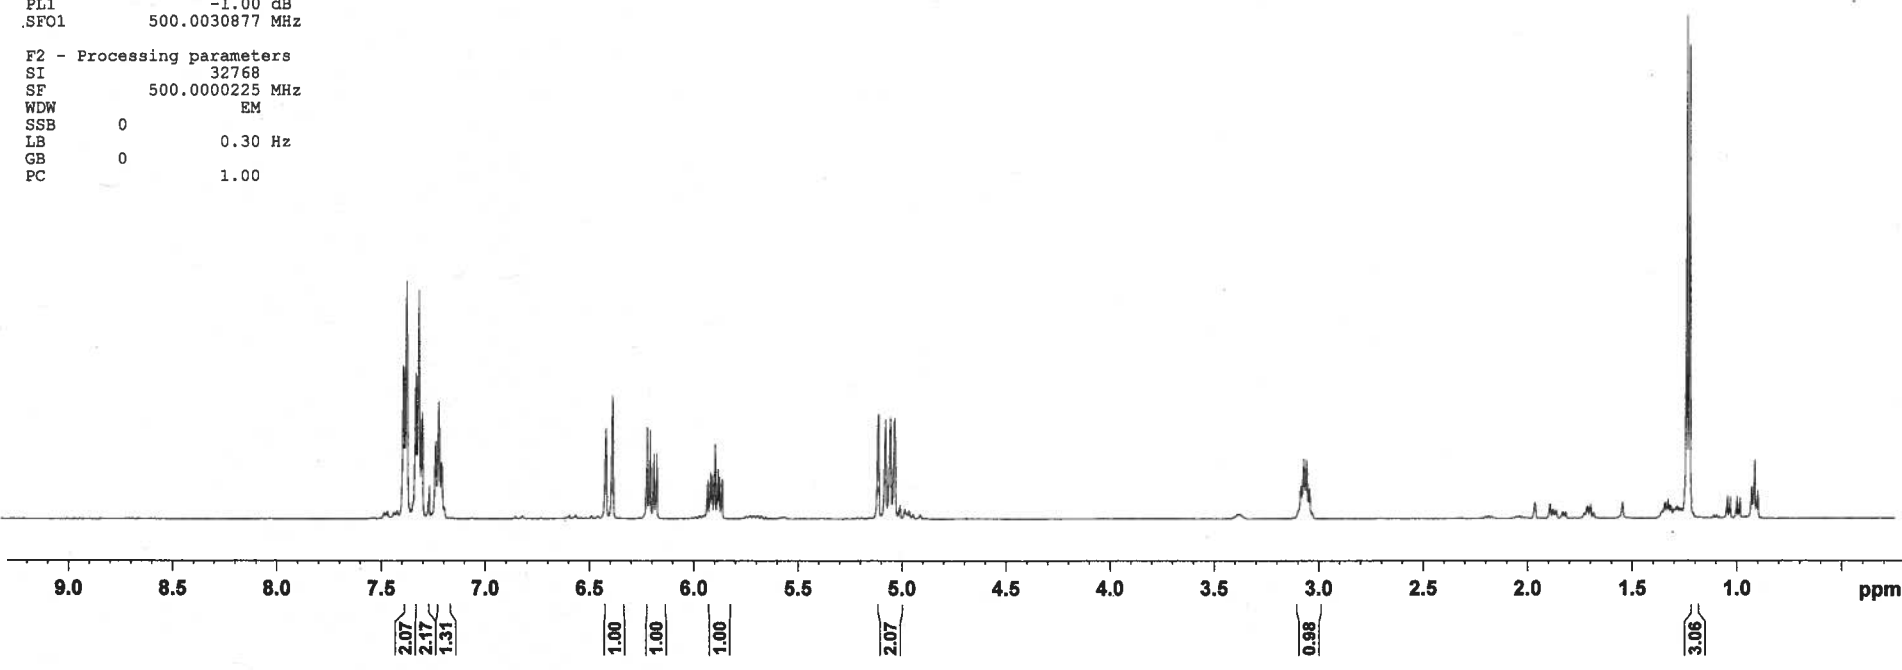

Proton NMR (500 MHz, Chloroform) Spectra of Compound **15g** Using DPPM

Current Data Parameters  
NAME yt-04-220rrpro  
EXPNO 9  
PROCNO 1

F2 - Acquisition Parameters  
Date\_ 20121223  
Time\_ 18.20  
INSTRUM spect  
PROBHD 5 mm Multinucl  
PULPROG zg30  
TD 65536  
SOLVENT CDCl3  
NS 16  
DS 2  
SWH 10330.578 Hz  
FIDRES 0.157632 Hz  
AQ 3.1719923 sec  
RG 161.3  
DW 48.400 usec  
DE 6.00 usec  
TE 683.2 K  
D1 1.00000000 sec  
MCREST 0 sec  
MCWRK 0.01500000 sec

----- CHANNEL f1 -----  
NUC1 1H  
P1 17.33 usec  
PL1 -1.00 dB  
SFO1 500.0030877 MHz

F2 - Processing parameters  
SI 32768  
SF 500.0000225 MHz  
WDW EM  
SSB 0  
LB 0.30 Hz  
GB 0  
PC 1.00

7.361  
7.359  
7.345  
7.302  
7.297  
7.287  
7.271  
7.208  
7.205  
7.191  
7.179  
7.177

6.389  
6.357

6.190  
6.176  
6.158  
6.144

5.899  
5.886  
5.879  
5.865  
5.851  
5.844  
5.831

5.083  
5.081  
5.078  
5.049  
5.046  
5.043  
5.025  
5.023  
5.004  
5.002  
4.999

Proton NMR (500 MHz, Chloroform) Spectra of Compound 15g

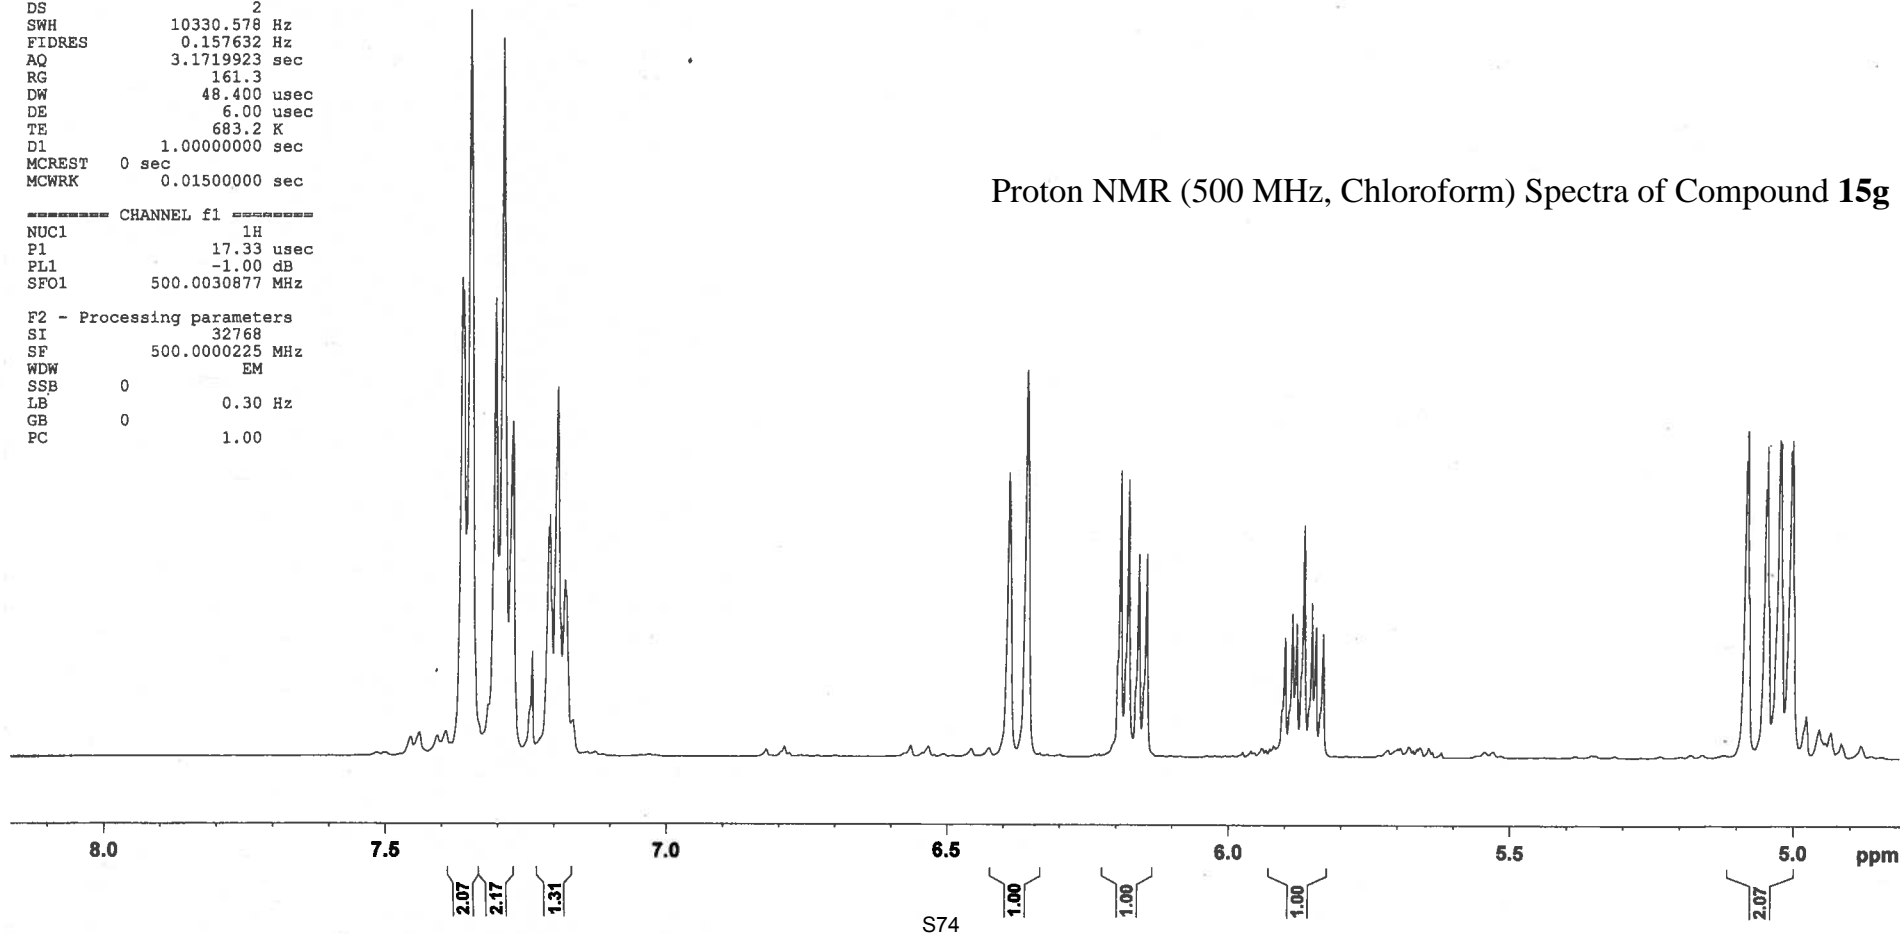

# Carbon NMR (125 MHz, Chloroform) Spectra of Compound 15g

Current Data Parameters  
 NAME yt-04-220rrcar  
 EXPNO 10  
 PROCNO 1

F2 - Acquisition Parameters  
 Date\_ 20121223  
 Time\_ 18.26  
 INSTRUM spect  
 PROBHD 5 mm Multinucl  
 PULPROG zgpg30  
 TD 65536  
 SOLVENT CDCl3  
 NS 221  
 DS 4  
 SWH 30030.029 Hz  
 FIDRES 0.458222 Hz  
 AQ 1.0912244 sec  
 RG 3251  
 DW 16.650 usec  
 DE 6.00 usec  
 TE 683.2 K  
 D1 2.00000000 sec  
 d11 0.03000000 sec  
 DELTA 1.89999998 sec  
 MCREST 0 sec  
 MCWRK 0.01500000 sec

===== CHANNEL f1 =====  
 NUC1 13C  
 P1 14.00 usec  
 PL1 -1.00 dB  
 SFO1 125.7376725 MHz

===== CHANNEL f2 =====  
 CPDPRG2 waltz16  
 NUC2 1H  
 PCPD2 68.00 usec  
 PL2 -1.00 dB  
 PL12 10.87 dB  
 PL13 22.50 dB  
 SFO2 500.0020000 MHz

F2 - Processing parameters  
 SI 32768  
 SF 125.7250774 MHz  
 WDW EM  
 SSB 0  
 LB 1.00 Hz  
 GB 0  
 PC 1.40

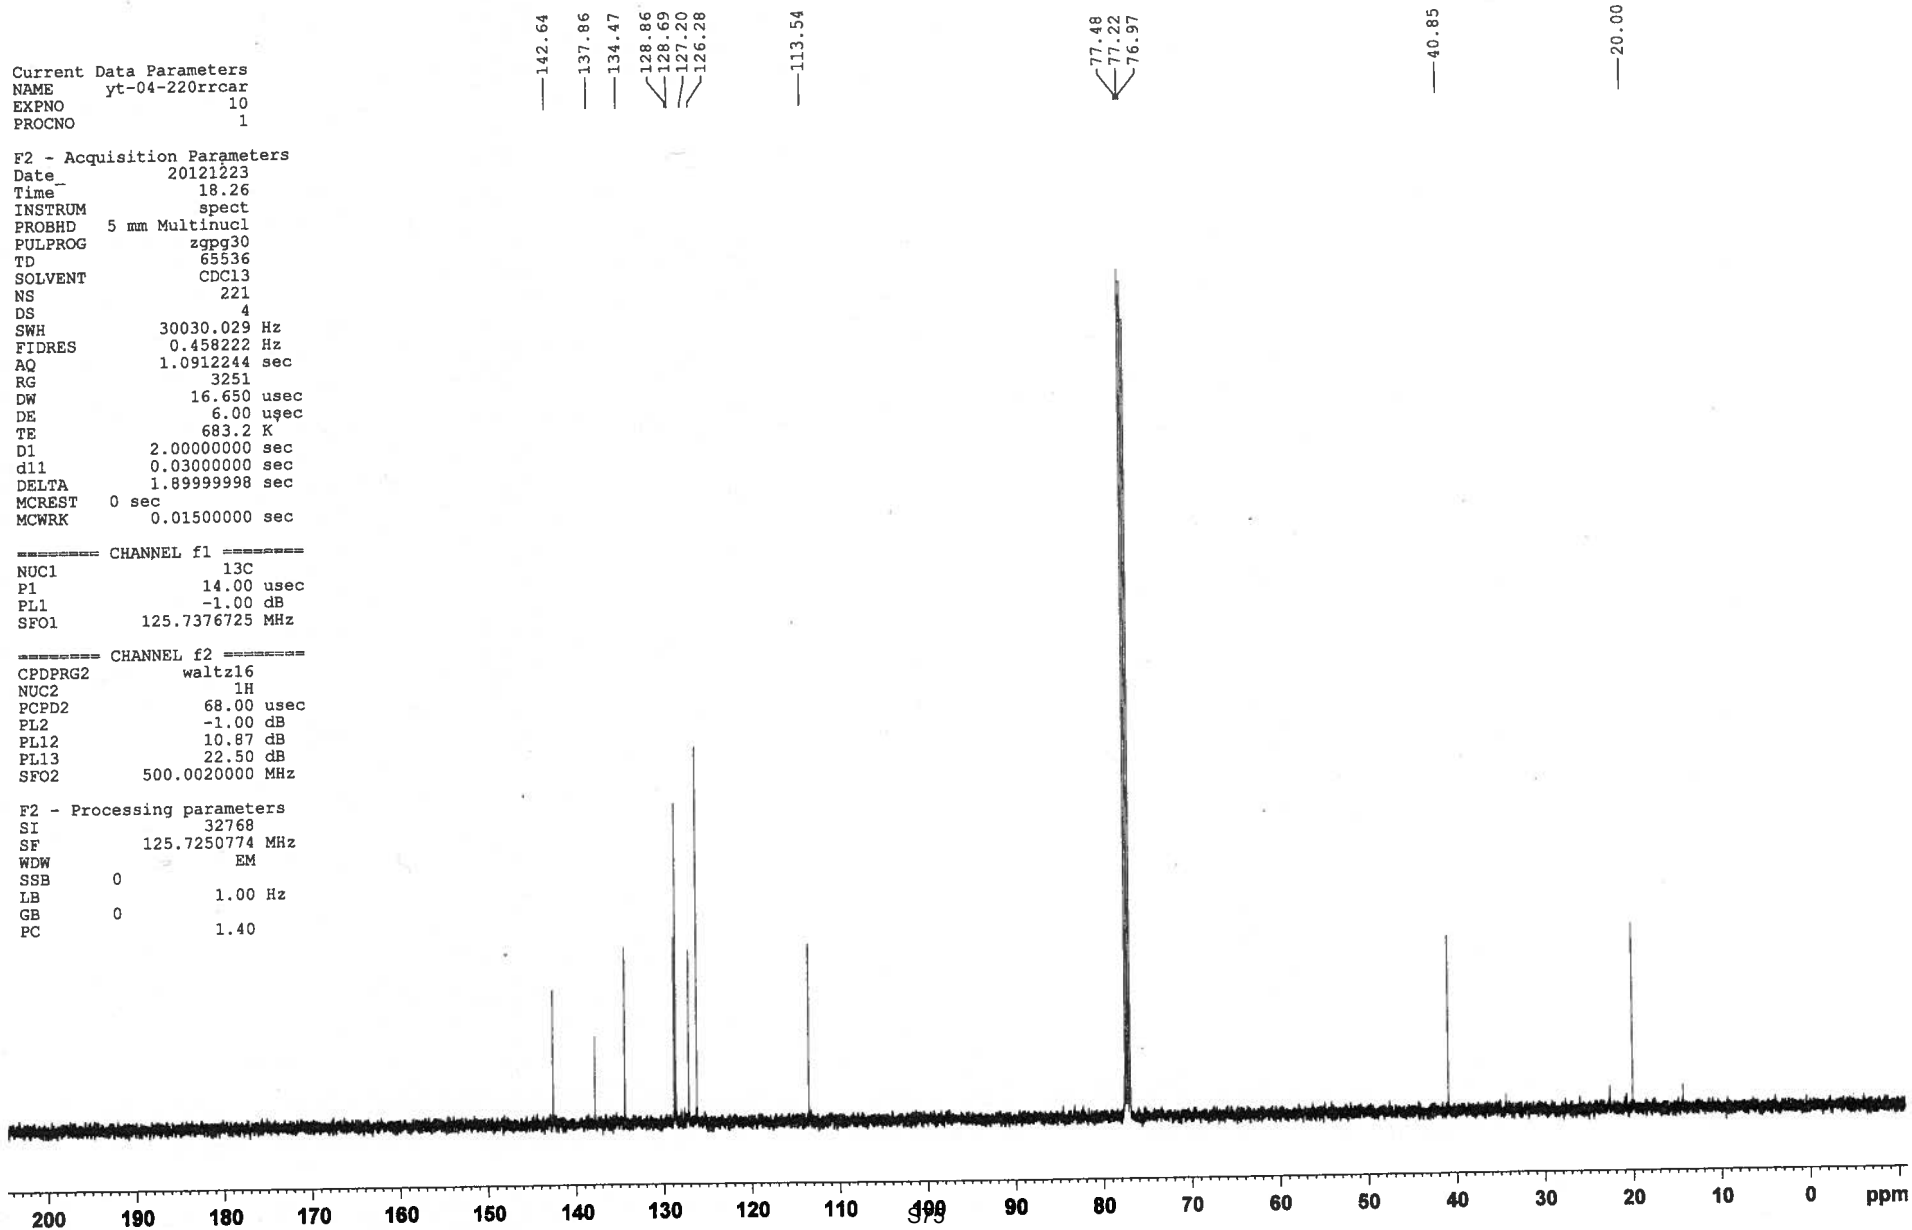

## Hydrovinylation of (*E*)-ethyl hexa-3,5-dienoate (12h)

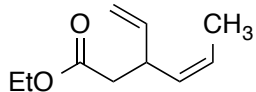

**Hydrovinylation of (*E*)-ethyl hexa-3,5-dienoate using [DPPM]CoCl<sub>2</sub> (Table 3, Entry 14):** To an oven dried round-bottom-flask with a sidearm, was added [DPPM]CoCl<sub>2</sub> (31 mg, 0.060 mmol) under argon and was dissolved in dichloromethane (1 mL) at room temperature.

Trimethylaluminium as a 2M solution in toluene (0.3 mL, 0.60 mmol) was added dropwise and the color of the solution changed from bluish brown to red brown with the formation of white fumes over the solution. After 2 to 3 minutes, the reaction vessel was carefully evacuated and then refilled with ethylene from a balloon. The reaction vessel was cooled to 0 °C and (*E*)-ethyl hexa-3,5-dienoate (84 mg, 0.60 mmol) in dichloromethane (1 mL) added under ethylene and the mixture was stirred for 15 h at ambient temperature. The ethylene balloon was removed and 0.1 mL methanol was added into the flask. The reaction solution was diluted with pentane (2 mL) and diethyl ether (2 mL) and warmed to room temperature and subsequently passed through a silica plug. The plug was washed with diethyl ether (3 x 5 mL). Due to low boiling nature of product, toluene solvent was first removed with flash chromatography with neat *n*-pentane as an eluent and the compound was flushed through diethyl ether to collect the product. Removal of solvent yielded the product as slight yellowish oil (84 mg, 84%). GC and NMR analysis showed that the product (**13h**) was essentially pure. <sup>1</sup>H NMR (CDCl<sub>3</sub>, 400 MHz): 1.22 (t, J = 7.2 Hz, 3 H), 1.62 (d, J = 7 Hz, 3 H), 2.30 (dd, J = 8, 15 Hz, 1 H), 2.42 (dd, J = 7, 15 Hz, 1 H), 3.52 - 3.58 (m, 1 H), 4.09 (q, J = 7 Hz, 2 H), 5.01 (dd, J = 17, 24 Hz, 2 H), 5.20 (t, J = 10 Hz, 1 H), 5.47 - 5.55 (m, 1 H), 5.72 (ddd, J = 6.4, 10.4, 17.2 Hz, 1 H). <sup>13</sup>C NMR (CDCl<sub>3</sub>, 125.02 MHz): 13.41, 14.69, 38.23, 40.48, 60.73, 114.54, 125.84, 131.21, 140.02, 172.45. ESI-MS; m/z 191.1061 [M + Na]; mass calculated for C<sub>10</sub>H<sub>16</sub>NaO<sub>2</sub>, 191.1043.

CSP GC (Cyclosil, OT 80 °C/ isothermal, H<sub>2</sub> carrier gas): Starting material R<sub>T</sub> = 19.14 min. R<sub>T</sub> for product = 22.84 min and 23.24 min (enantiomers). Enantioselectivity is 92 % with (*S,S*)-[BDPP]CoCl<sub>2</sub> (Table 5, entry 14). (Josiphos 2)CoCl<sub>2</sub> (5 mol% catalyst) gave no conversion.

This following table shows the additional experiments conducted by using diene (*E*)-ethyl hexa-3,5-dienoate employing 10 mol % catalyst (see also Table 3 in the paper for details).

| Entry | Catalyst                             | Temp/Time   | Activator | Conversion  | Product (%ee)               |
|-------|--------------------------------------|-------------|-----------|-------------|-----------------------------|
| 1.    | DPPMCoCl <sub>2</sub>                | 0-16°C/15hr | TMA       | 100%        | ( <i>Z</i> )-1,4 HV         |
| 2.    | DPPECoCl <sub>2</sub>                | 5°C/9hr     | TMA       | No reaction | SM                          |
| 3.    | DPPPCoCl <sub>2</sub>                | 5°C/7hr     | TMA       | No reaction | SM                          |
| 4.    | DPPBCoCl <sub>2</sub>                | 5°C/11hr    | TMA       | No reaction | SM                          |
| 5.    | ( <i>S,S</i> )-BDPPCoCl <sub>2</sub> | 0°C-rt/15hr | TMA       | 100%        | ( <i>Z</i> )-1,4HV (92% ee) |
| 6.    | ( <i>S,S</i> )-DIOPCoCl <sub>2</sub> | 10°C/12hr   | TMA       | No reaction | SM                          |
| 7.    | JosiphosCoCl <sub>2</sub>            | 8°C/8hr     | TMA       | No reaction | SM                          |

Sample Name: YT-04-118.D

```

=====
Acq. Operator   : yam                      Seq. Line :    1
Acq. Instrument : Babu                    Location  : Vial 201
Injection Date  : 8/20/2012 3:59:07 PM    Inj       :    1
                                           Inj Volume: 1 µl
Different Inj Volume from Sequence !      Actual Inj Volume : 4 µl
Acq. Method     : C:\CHEM32\1\DATA\YAM\YT-1-CHIRAL 2012-08-20 15-58-05\YT_80_C_CHIRAL.M
Last changed    : 8/20/2012 3:58:05 PM by yam
Analysis Method : C:\CHEM32\1\METHODS\BAKE.M
Last changed    : 11/28/2012 11:00:38 AM by Kendra Dewese
                (modified after loading)
=====

```

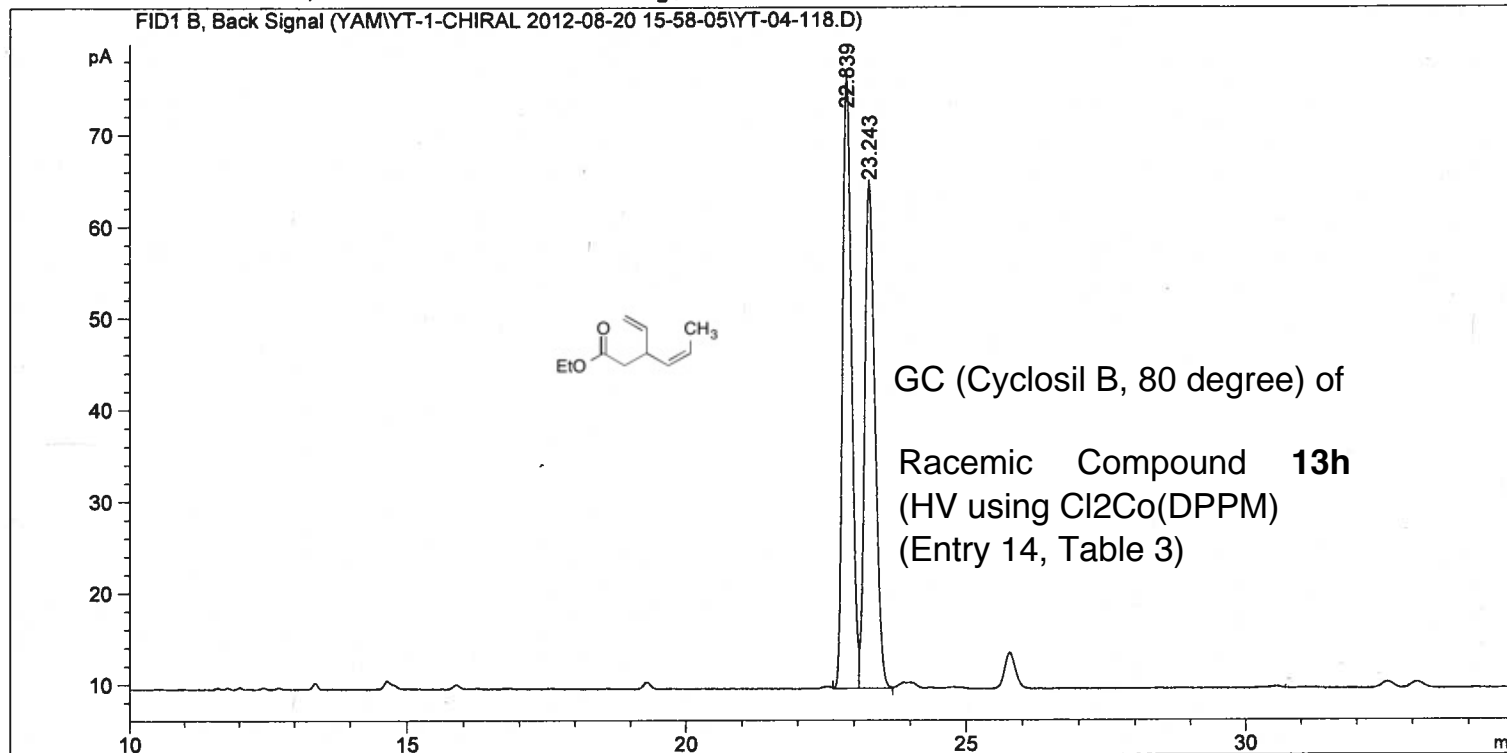

```

=====
                          Area Percent Report
=====

```

```

Sorted By      :      Signal
Multiplier:    :      1.0000
Dilution:      :      1.0000
Use Multiplier & Dilution Factor with ISTDs

```

Signal 1: FID1 B, Back Signal

| Peak # | RetTime [min] | Type | Width [min] | Area [pA*s] | Height [pA] | Area %   |
|--------|---------------|------|-------------|-------------|-------------|----------|
| 1      | 22.839        | VV   | 0.1757      | 744.05518   | 66.31979    | 51.50566 |
| 2      | 23.243        | VV   | 0.1938      | 700.55347   | 54.85747    | 48.49434 |

```
Totals :                1444.60864  121.17726
```

```

=====
*** End of Report ***

```

Sample Name: YT-05-192-4,5.D

```

=====
Acq. Operator   : YAM                      Seq. Line :    1
Acq. Instrument : Babu                    Location  : Vial 201
Injection Date  : 10/10/2013 3:02:38 PM   Inj       :    1
                                           Inj Volume: 1 µl
Different Inj Volume from Sequence !      Actual Inj Volume : 3 µl
Acq. Method    : C:\CHEM32\1\DATA\YAM\YT-1-CHIRAL 2013-10-10 15-01-23\YT_85_C_CHIRAL.M
Last changed   : 10/9/2013 4:51:45 PM by YAM
Analysis Method : C:\CHEM32\1\METHODS\YT_85_C_CHIRAL.M
Last changed   : 10/10/2013 4:47:26 PM by YAM
                (modified after loading)
=====

```

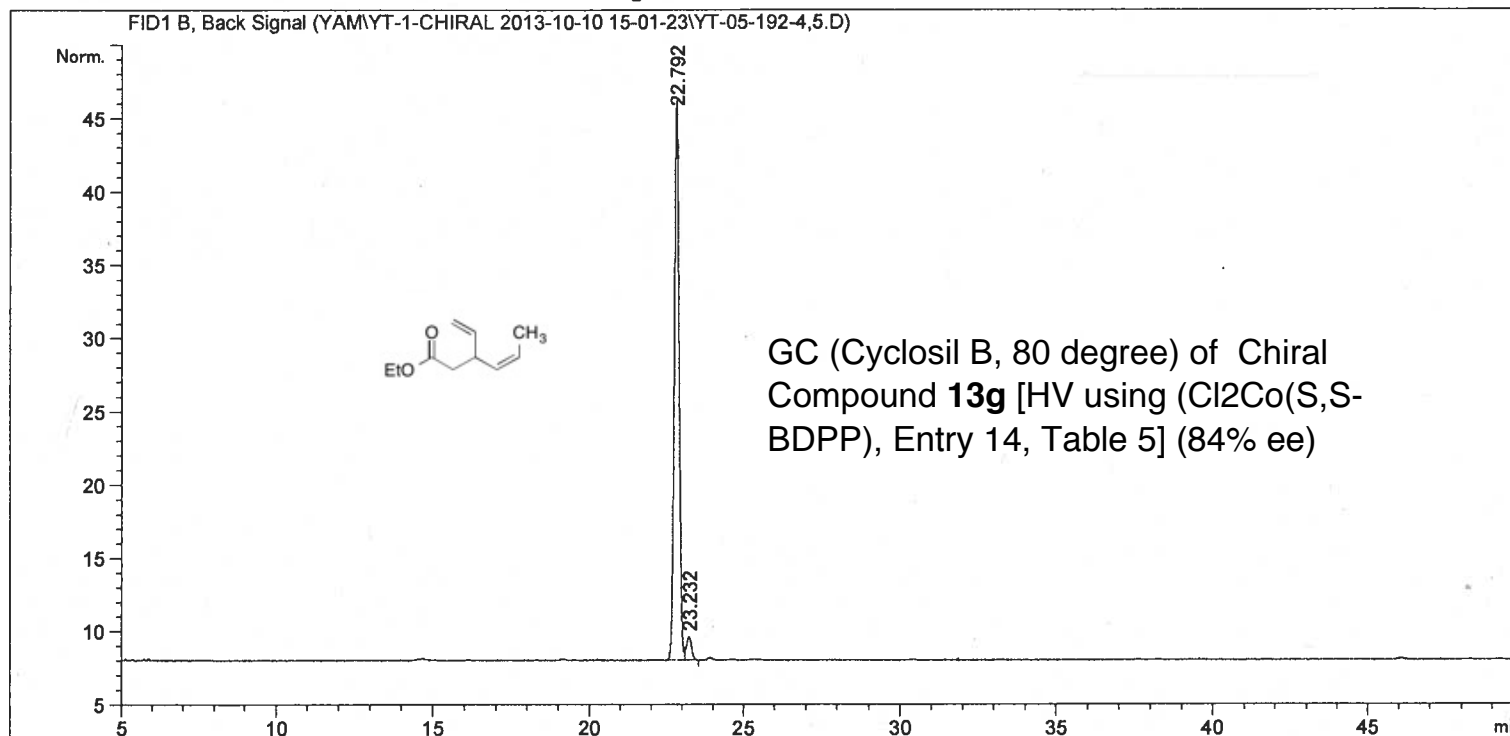

```

=====
                          Area Percent Report
=====

```

```

Sorted By           :      Signal
Multiplier:         :      1.0000
Dilution:           :      1.0000
Use Multiplier & Dilution Factor with ISTDs

```

Signal 1: FID1 B, Back Signal

| Peak # | RetTime [min] | Type | Width [min] | Area [pA*s] | Height [pA] | Area %   |
|--------|---------------|------|-------------|-------------|-------------|----------|
| 1      | 22.792        | BV   | 0.1668      | 415.19519   | 38.21350    | 95.71836 |
| 2      | 23.232        | VB   | 0.1779      | 18.57237    | 1.60893     | 4.28164  |

```
Totals :                433.76756    39.82243
```

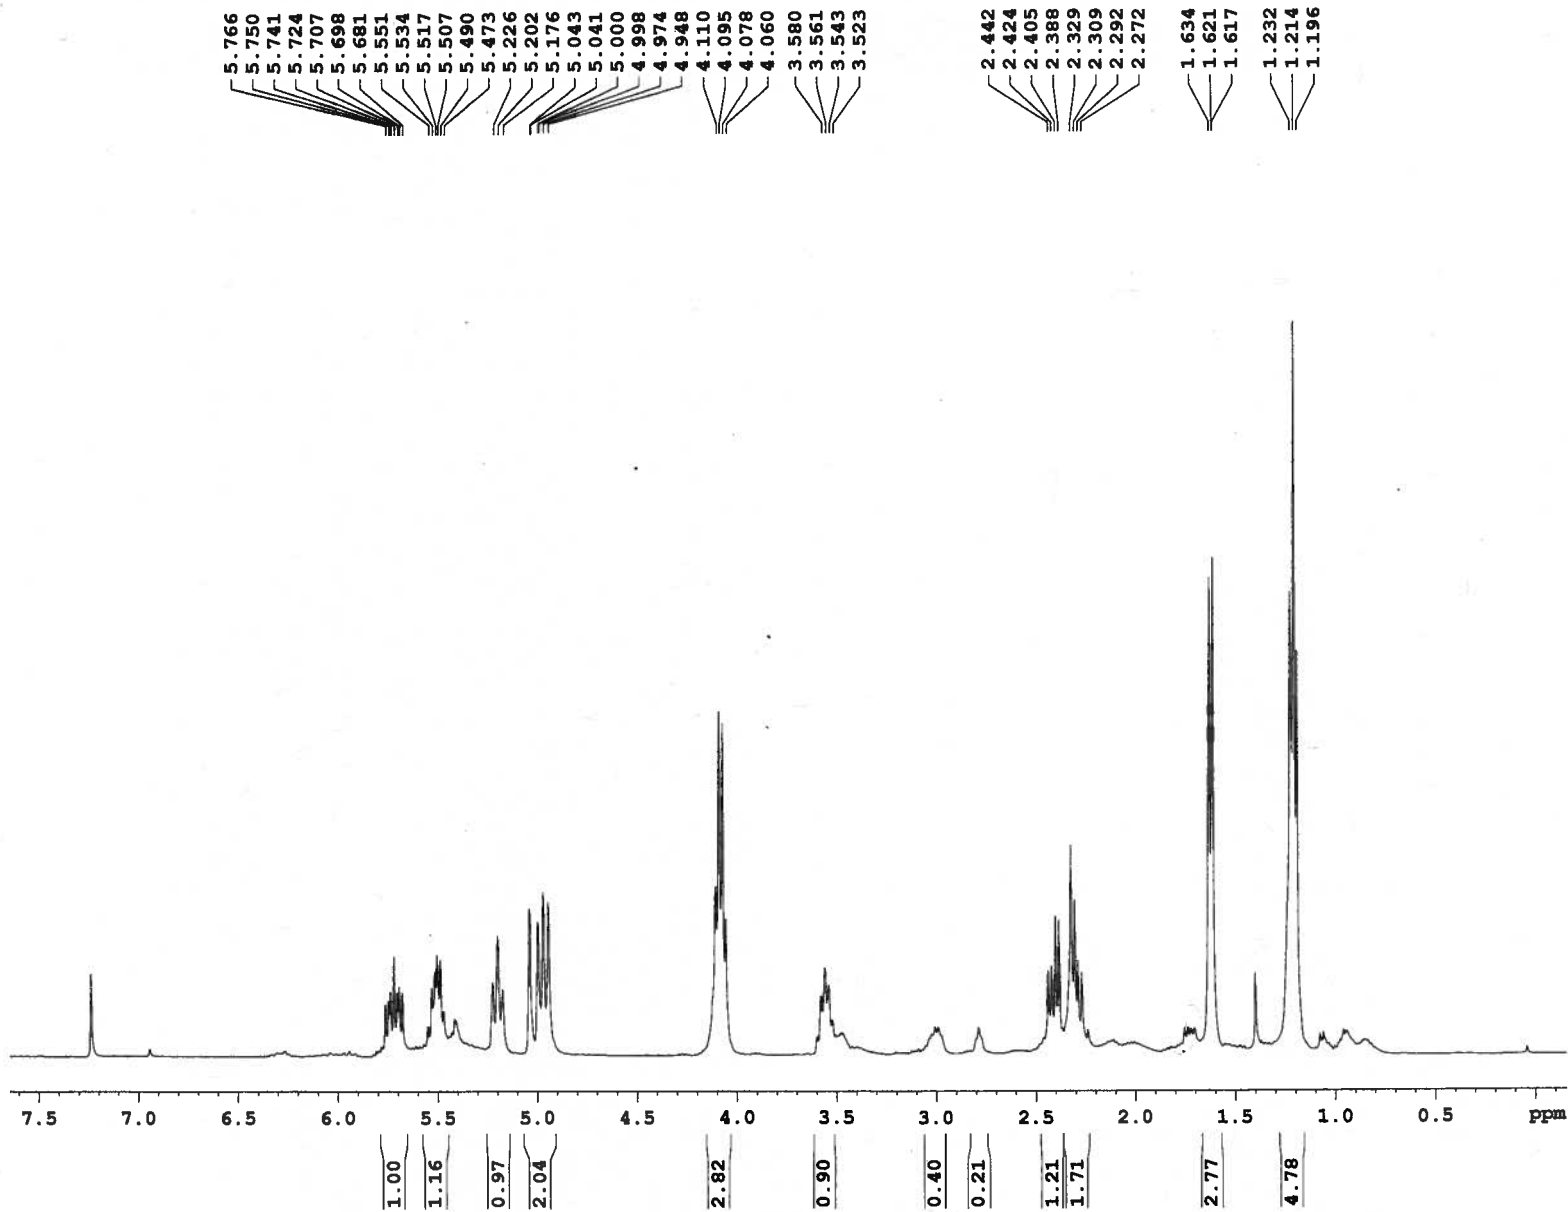

Current Data Parameters  
 NAME yt-04-198 pure pa  
 EXPNO 702  
 PROCNO 1

F2 - Acquisition Parameter  
 Date\_ 20121107  
 Time\_ 9.13  
 INSTRUM spect  
 PROBHD 5 mm BBI 1H-BB  
 PULPROG zg30  
 TD 65536  
 SOLVENT CDC13  
 NS 16  
 DS 2  
 SWH 8250.825 Hz  
 FIDRES 0.125898 Hz  
 AQ 3.9715922 se  
 RG 40.3  
 DW 60.600 us  
 DE 6.00 us  
 TE 300.2 K  
 D1 1.00000000 se  
 TD0 1

===== CHANNEL f1 =====  
 NUC1 1H  
 P1 8.00 us  
 PL1 -2.65 dB  
 SFO1 400.1324710 MHz

F2 - Processing parameters  
 SI 32768  
 SF 400.1300167 MHz  
 WDW EM  
 SSB 0  
 LB 0.30 Hz  
 GB 0  
 PC 1.00

Proton NMR (400 MHz, chloroform) spectrum of compound **13h** (HV using Cl<sub>2</sub>Co(DPPM))

Proton NMR (400 MHz, Chloroform) Spectra of Compound **13h** Using DPPM (Expanded Alkene Region)

5.766  
5.750  
5.741  
5.724  
5.707  
5.698  
5.681  
5.551  
5.534  
5.517  
5.507  
5.490  
5.473

5.226  
5.202  
5.176

5.043  
5.041  
5.000  
4.998  
4.974  
4.948

4.110  
4.095  
4.078  
4.060

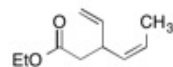

Current Data Parameters  
NAME yt-04-198 pure pa  
EXPNO 702  
PROCNO 1

F2 - Acquisition Parameter  
Date 20121107  
Time 9.13  
INSTRUM spect  
PROBHD 5 mm BBI 1H-BB  
PULPROG zg30  
TD 65536  
SOLVENT CDCl3  
NS 16  
DS 2  
SWH 8250.825 Hz  
FIDRES 0.125898 Hz  
AQ 3.9715922 se  
RG 40.3  
DW 60.600 us  
DE 6.00 us  
TE 300.2 K  
D1 1.00000000 se  
TDO 1

==== CHANNEL f1 =====  
NUC1 1H  
P1 8.00 us  
PL1 -2.65 dB  
SFO1 400.1324710 MHz

F2 - Processing parameters  
SI 32768  
SF 400.1300167 MHz  
WDW EM  
SSB 0  
LB 0.30 Hz  
GB 0  
PC 1.00

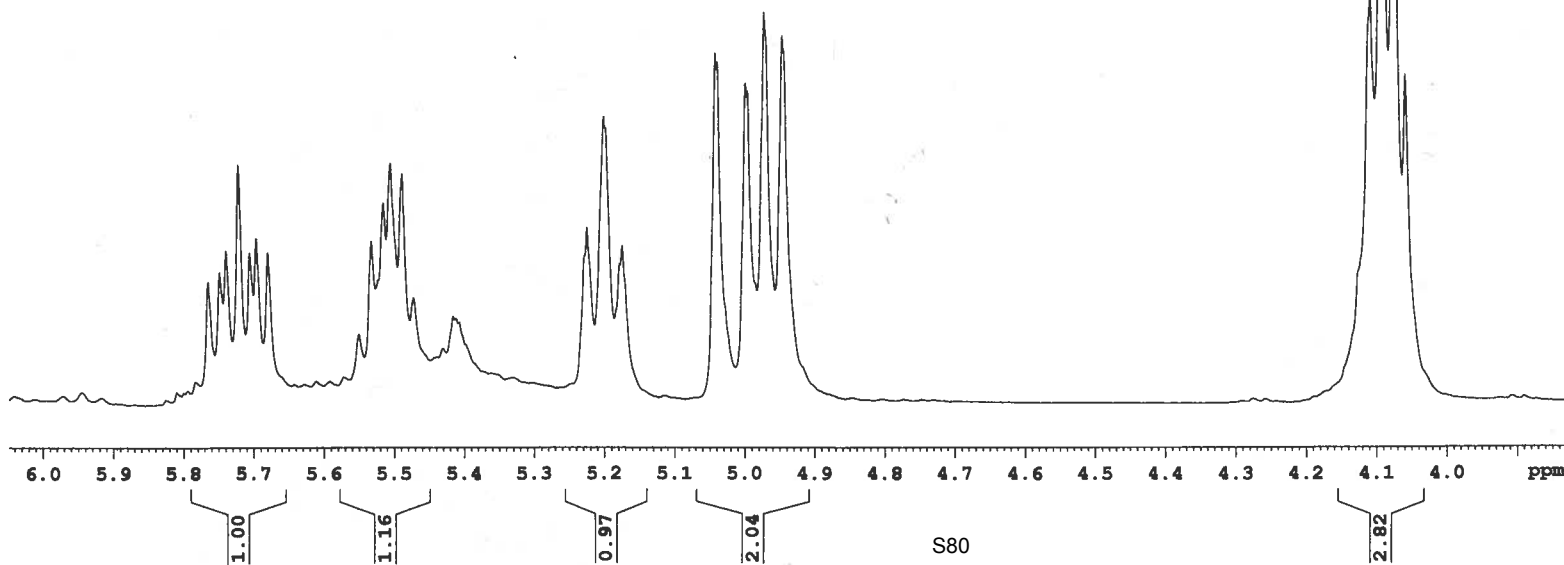



# Carbon NMR (125 MHz, Chloroform) Spectra of Compound 13h Using DPPM

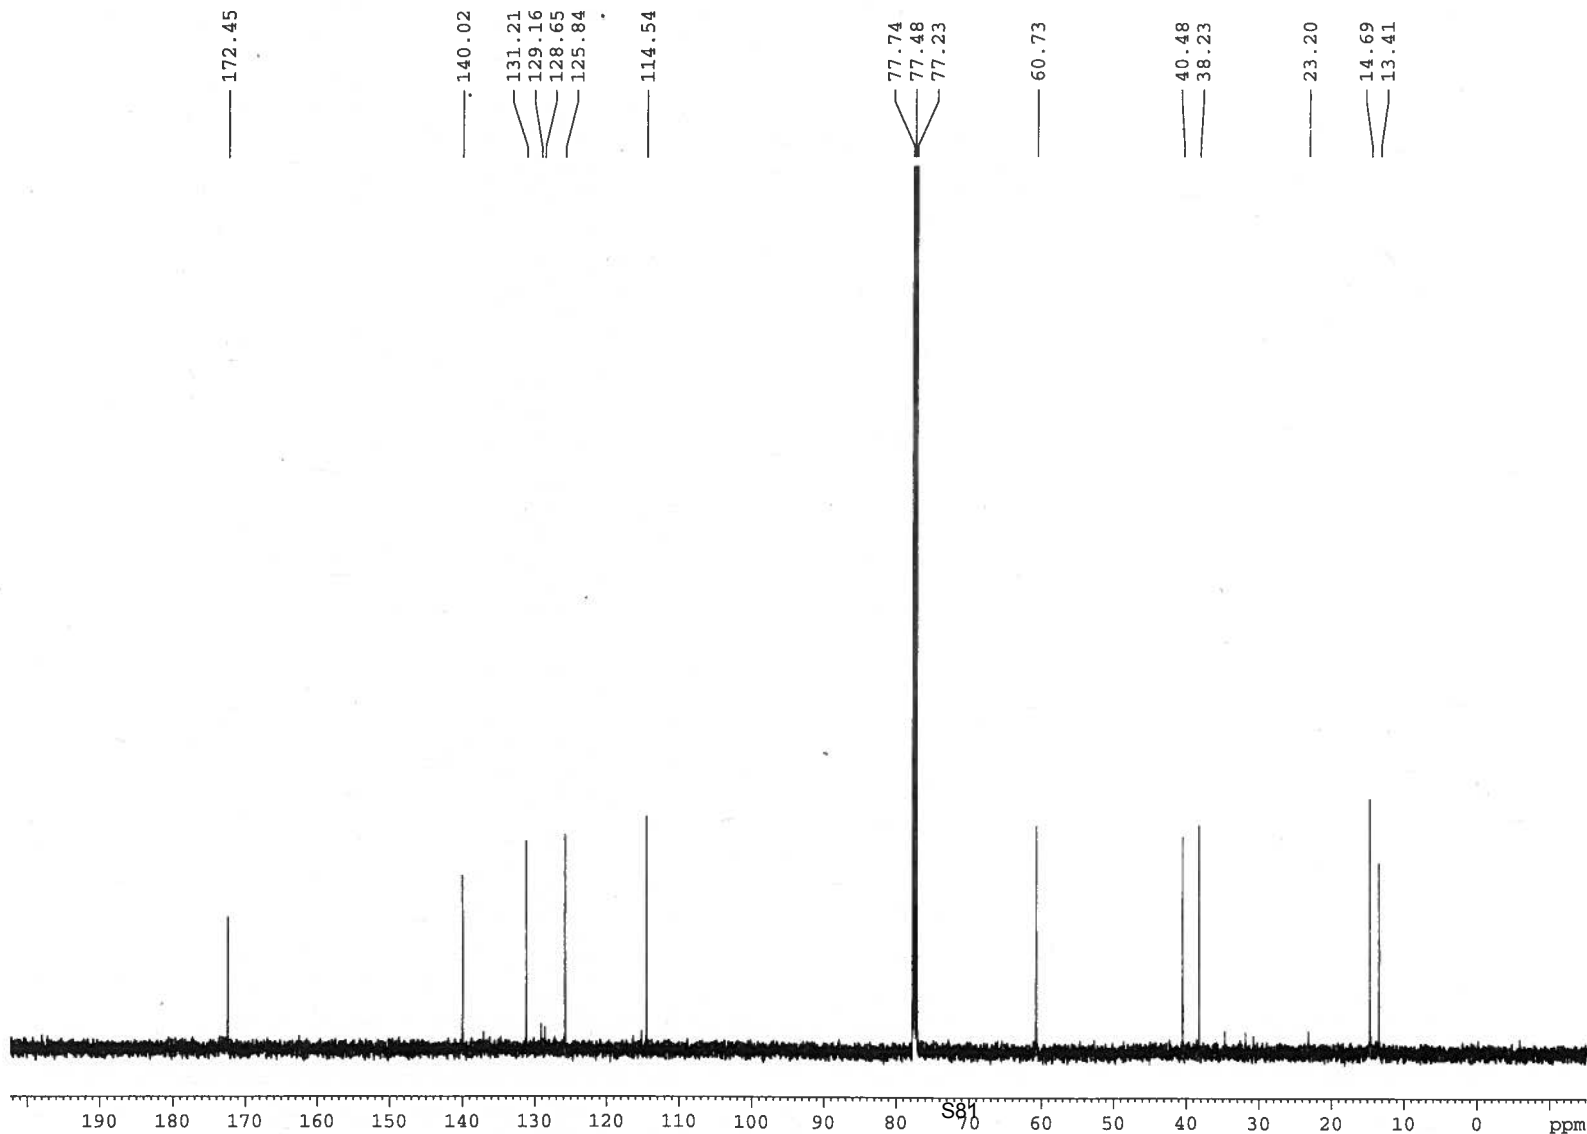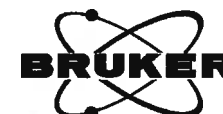

Current Data Parameters  
 NAME yt-04-198carbon  
 EXPNO 3  
 PROCNO 1

F2 - Acquisition Parameters  
 Date\_ 20121107  
 Time 18.54  
 INSTRUM spect  
 PROBHD 5 mm Multinucl  
 PULPROG zgpg30  
 TD 65536  
 SOLVENT CDCl3  
 NS 882  
 DS 4  
 SWH 30030.029 Hz  
 FIDRES 0.458222 Hz  
 AQ 1.0912244 sec  
 RG 6502  
 DW 16.650 usec  
 DE 6.00 usec  
 TE 300.2 K  
 D1 2.00000000 sec  
 d11 0.03000000 sec  
 DELTA 1.89999998 sec  
 MCREST 0.00000000 sec  
 MCWRK 0.01500000 sec

===== CHANNEL f1 =====  
 NUC1 13C  
 P1 14.00 usec  
 PL1 -1.00 dB  
 SFO1 125.7376725 MHz

===== CHANNEL f2 =====  
 CPDPRG2 waltz16  
 NUC2 1H  
 PCPD2 68.00 usec  
 PL2 -1.00 dB  
 PL12 10.87 dB  
 PL13 22.50 dB  
 SFO2 500.0020000 MHz

F2 - Processing parameters  
 SI 32768  
 SF 125.7250430 MHz  
 WDW EM  
 SSB 0  
 LB 1.00 Hz  
 GB 0  
 PC 1.40

## Hydrovinylation of (*E*)-6-benzyloxy-1,3-hexadiene (**12i**)

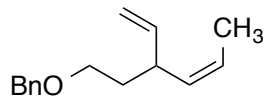

### Hydrovinylation of (*E*)-6-benzyloxy-1,3-hexadiene using [dppb]CoCl<sub>2</sub> (Table 3, Entry 15).

To an oven dried round bottom flask with a sidearm, was added [dppb]CoCl<sub>2</sub> (26 mg, 0.047 mmol) and methylaluminumoxane (55 mg, 0.94 mmol) under argon and dissolved in dichloromethane (1 mL) at room temperature. After addition of dichloromethane, color of the solution changed from deep blue to red brown with the formation of white fumes over the solution. After 2 to 3 minutes, the reaction vessel was carefully evacuated and then refilled with ethylene balloon. The reaction vessel was cooled to -15 °C and (*E*)-6-benzyloxy-1,3-hexadiene (88 mg, 0.47 mmol) added under ethylene and the mixture was stirred for 14 h. The ethylene balloon was removed and 0.1 mL methanol was added into the flask. The reaction solution was diluted with pentane (4 mL) and diethyl ether (4 mL) and warmed to room temperature and subsequently passed through a silica plug. The plug was washed with diethyl ether (3 x 5 mL). Flash chromatography (5 % EtOAc in hexane) and removal of solvent yielded the product as slight yellow oil (98 mg, 97%). GC and NMR analysis showed that the product (**13i**) was essentially pure.

<sup>1</sup>H NMR (CDCl<sub>3</sub>, 400 MHz): 1.54 - 1.59 (m, 1 H), 1.61 (dd, J = 1.6, 6.8 Hz, 3 H), 1.74 - 1.82 (m, 1 H), 3.21 - 3.29 (m, 1 H), 3.40 - 3.51 (m, 2 H), 4.47 (s, 2 H), 4.94 (dd, J = 1.2, 10 Hz, 1H), 4.99 (dt, J = 1.6, 17.2 Hz, 1 H), 5.19 (td, J = 1.6, 10.8 Hz, 1 H), 5.47 - 5.55 (m, 1 H), 5.71 (ddd, J = 6.8, 10.4, 17.2 Hz), 7.25 - 7.33 (m, aromatic, 5H). <sup>13</sup>C NMR (CDCl<sub>3</sub>, 125.02 MHz): 13.23, 35.17, 38.08, 68.43, 73.21, 113.61, 124.87, 127.69, 127.85, 128.54, 132.49, 138.85, 141.37. ESI-MS; m/z 239.1396 [M + Na]; mass calculated for C<sub>15</sub>H<sub>20</sub>ONa, 239.1406.

Gas Chromatography: Methylsilicone SP GC (OT 150 °C/isothermal, He carrier gas) starting material R<sub>T</sub> = 10.49 min. R<sub>T</sub> for product = 14.37 min. CSP GC (Cyclosil, OT 150 °C/isothermal, H<sub>2</sub> carrier gas). Starting material R<sub>T</sub> = 12.36 min. R<sub>T</sub> for product = 15.08 min. and 15.33 min (enantiomers, racemic from DPPBCoCl<sub>2</sub>). (*S,S*)-DIOPCoCl<sub>2</sub> gave 94% ee. Reaction carried out with [(*S,S*)-DIOP]CoCl<sub>2</sub> at -20 °C gave 99% ee, albeit in lower (40%) conversion).

### Asymmetric hydrovinylation of (*E*)-6-benzyloxy-1,3-hexadiene using (*S,S*)-[DIOP]CoCl<sub>2</sub> (Table 5, Entry 17):

To an oven dried round bottom flask with a sidearm, was added (*SS*)-[DIOP]CoCl<sub>2</sub> (10 mg, 0.016 mmol) and methylaluminumoxane (18 mg, 0.32 mmol) under argon and dissolved in dichloromethane (0.5 mL) at room temperature. After addition of dichloromethane, color of the solution changed from deep blue to red brown with the formation of white fumes over the solution. After 2 to 3 minutes, the reaction vessel was carefully evacuated and then refilled with ethylene balloon. The reaction vessel was cooled to -15 °C and (*E*)-6-benzyloxy-1,3-hexadiene (30 mg, 0.16 mmol) added under ethylene and the mixture was stirred for 14 h. The ethylene balloon was removed and 0.1 mL methanol was added into the flask. The reaction solution was diluted with pentane (2 mL) and diethyl ether (2 mL) and warmed to room temperature and subsequently passed through a silica plug. The plug was washed with diethyl ether (3 x 5 mL). Flash chromatography (5 % EtOAc in hexane) and removal of solvent yielded the product as slight yellow oil (28 mg, 88%). GC and NMR analysis showed that the product was essentially pure. <sup>1</sup>H NMR (CDCl<sub>3</sub>, 400 MHz): 1.54 - 1.59 (m, 1 H), 1.61 (dd, J = 1.6, 6.8 Hz, 3 H), 1.74 - 1.82 (m, 1 H), 3.21 - 3.29 (m, 1 H), 3.40 - 3.51 (m, 2 H), 4.47 (s, 2 H), 4.94 (dd, J = 1.2, 10 Hz, 1H), 4.99 (dt, J = 1.6, 17.2 Hz, 1 H), 5.19 (td, J = 1.6, 10.8 Hz, 1 H), 5.47 - 5.55 (m, 1 H), 5.71 (ddd, J = 6.8, 10.4, 17.2 Hz), 7.25 - 7.33 (m, aromatic,

5H).  $^{13}\text{C}$  NMR ( $\text{CDCl}_3$ , 125.02 MHz): 13.23, 35.17, 38.08, 68.43, 73.21, 113.61, 124.87, 127.69, 127.85, 128.54, 132.49, 138.85, 141.37. ESI-MS;  $m/z$  239.1396  $[\text{M} + \text{Na}]$ ; mass calculated for  $\text{C}_{15}\text{H}_{20}\text{ONa}$ , 239.1406.

$[(S,S)\text{-DIOP}]\text{CoCl}_2$  gave 94% ee at full conversion.

This following table shows the percent conversion and percent ee's obtained using other catalysts.

| Catalyst                    | % ee            | % conversion |
|-----------------------------|-----------------|--------------|
| $(S,S)\text{-[BDPP]CoCl}_2$ | 92              | 100          |
| $(S,S)\text{-[DIOP]CoCl}_2$ | 99 <sup>a</sup> | 40           |
| <b>L18</b> Joshiphos 2      | 71              | 92           |

<sup>a</sup> at  $-10\text{ }^\circ\text{C}/6\text{ h}$ , 100%, 94% ee.

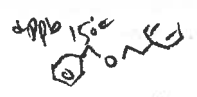

YT-04-09/dppb cocat. / MAO

\*  
\*  
\*  
\*  
\*  
\*

\* RUN # 360 APR 15, 1901 01:41:48  
START

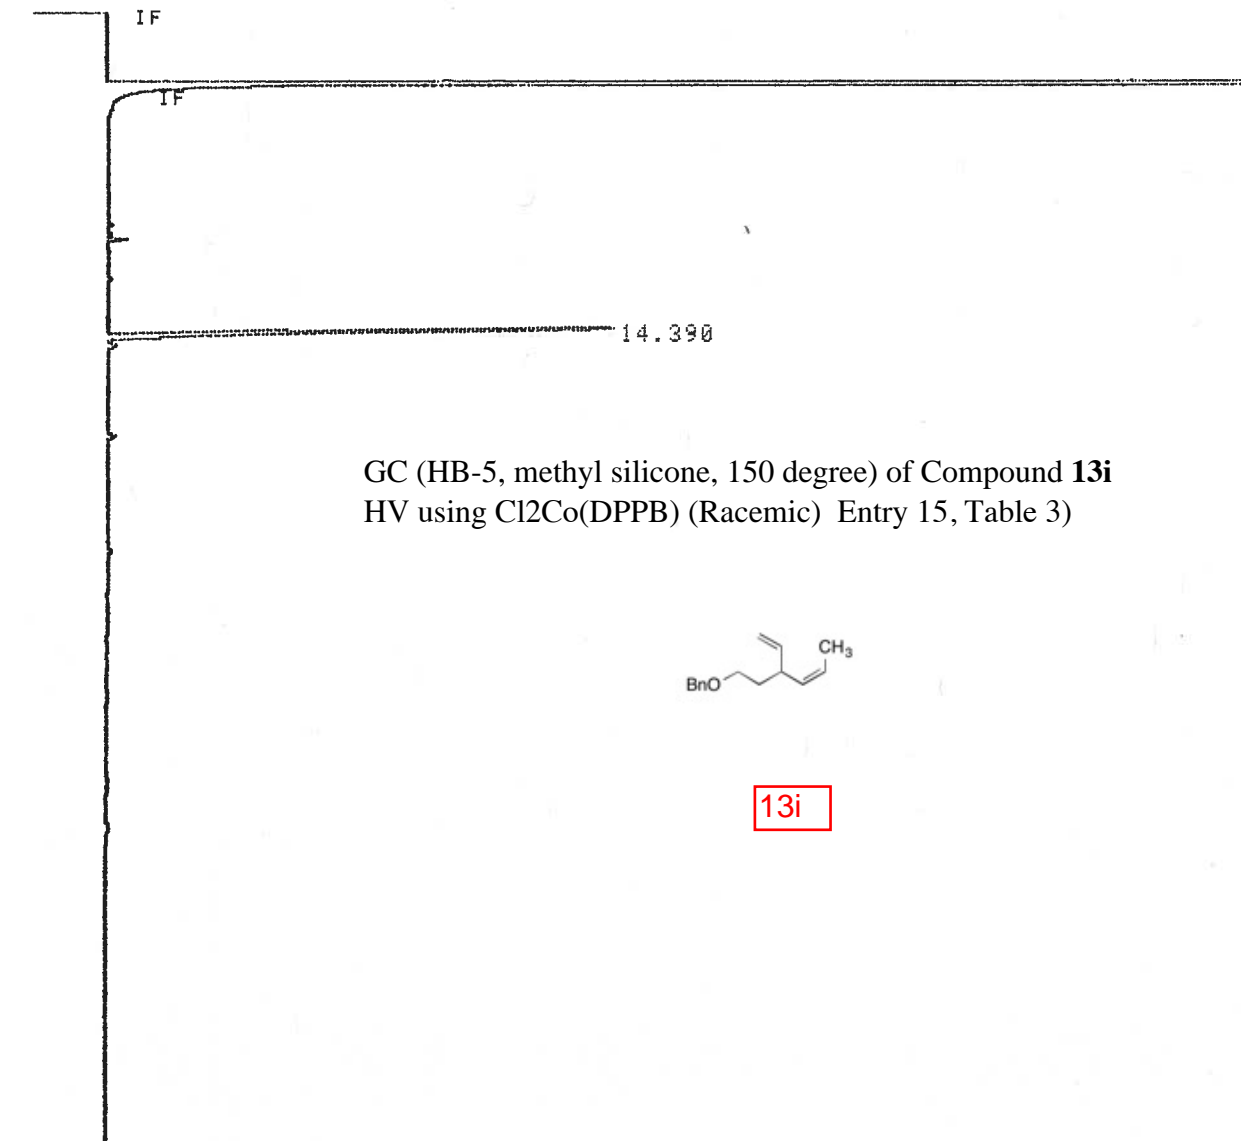

GC (HB-5, methyl silicone, 150 degree) of Compound **13i**  
HV using Cl<sub>2</sub>Co(DPPB) (Racemic) Entry 15, Table 3)

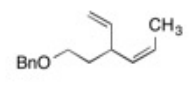

**13i**

TIMETABLE STOP

RUN# 360 APR 15, 1901 01:41:48

| AREA% | RT     | AREA   | TYPE | WIDTH | AREA%     |
|-------|--------|--------|------|-------|-----------|
|       | 14.390 | 215340 | BP   | .125  | 100.00000 |

TOTAL AREA= 215340  
MUL FACTOR=1.00000E+00

\*  
\*

Sample Name: YT-04-09DPPBRR.D

```

=====
Acq. Operator   : YAM                      Seq. Line :    1
Acq. Instrument : Babu                    Location  : Vial 201
Injection Date  : 2/25/2013 11:51:19 AM   Inj       :    1
                                           Inj Volume: 1 µl
Different Inj Volume from Sequence !      Actual Inj Volume : 3 µl
Acq. Method    : C:\CHEM32\1\DATA\YAM\YT-1-CHIRAL' 2013-02-25 11-50-11\YT_85_C_CHIRAL.M
Last changed   : 2/25/2013 10:26:04 AM by YAM
Analysis Method : C:\CHEM32\1\METHODS\35_CYCLODEX-B.M
Last changed   : 9/9/2013 11:17:53 AM by Kendra
                (modified after loading)
    
```

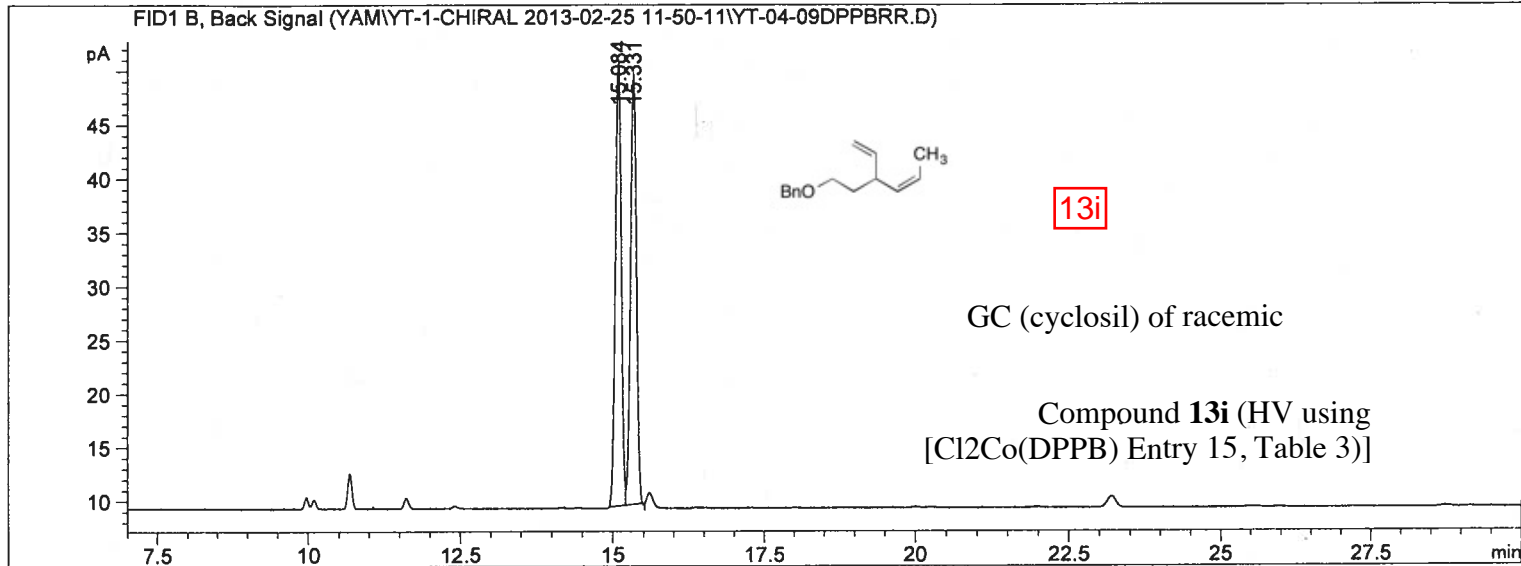

=====  
Area Percent Report  
=====

```

Sorted By      :      Signal
Multiplier:    :      1.0000
Dilution:      :      1.0000
Use Multiplier & Dilution Factor with ISTDs
    
```

Signal 1: FID1 B, Back Signal

| Peak # | RetTime [min] | Type | Width [min] | Area [pA*s] | Height [pA] | Area %   |
|--------|---------------|------|-------------|-------------|-------------|----------|
| 1      | 15.084        | BV   | 0.1036      | 269.52896   | 41.15466    | 50.19640 |
| 2      | 15.331        | VB   | 0.1052      | 267.41983   | 39.99708    | 49.80360 |

Totals :                    536.94879    81.15174

=====  
\*\*\* End of Report \*\*\*

Sample Name: YT-04-138SMR.D

```

=====
Acq. Operator   : YAM                      Seq. Line :    1
Acq. Instrument : Babu                     Location  : Vial 201
Injection Date  : 8/22/2012 3:37:31 PM      Inj       :    1
                                                Inj Volume: 1 µl

Different Inj Volume from Sequence !      Actual Inj Volume : 5 µl
Acq. Method    : C:\CHEM32\1\DATA\YAM\YT-1-CHIRAL 2012-08-22 15-36-29\YT_80_C_CHIRAL.M
Last changed   : 8/22/2012 3:36:29 PM by YAM
Analysis Method : C:\CHEM32\1\METHODS\JP_NONADIENE.M
Last changed   : 2/25/2013 10:41:53 AM by CHANDRANI
                (modified after loading)
=====
    
```

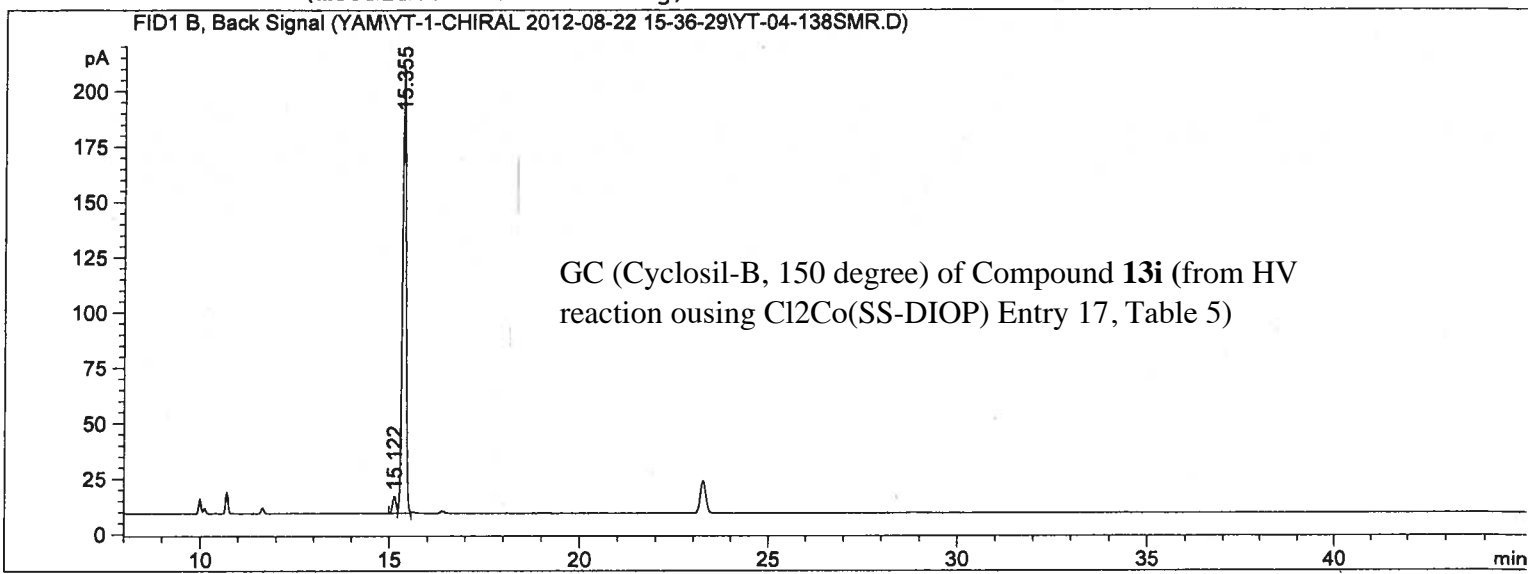

=====  
 Area Percent Report  
 =====

```

Sorted By      :      Signal
Multiplier:    :      1.0000
Dilution:      :      1.0000
Use Multiplier & Dilution Factor with ISTDs
    
```

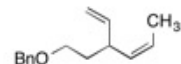

Signal 1: FID1 B, Back Signal

**13i**

| Peak # | RetTime [min] | Type | Width [min] | Area [pA*s] | Height [pA] | Area %   |
|--------|---------------|------|-------------|-------------|-------------|----------|
| 1      | 15.122        | BV   | 0.1015      | 49.09645    | 7.70513     | 3.49769  |
| 2      | 15.355        | VV   | 0.1059      | 1354.58533  | 200.70699   | 96.50231 |

Totals : 1403.68178 208.41211

=====  
 \*\*\* End of Report \*\*\*

150 @ 10 min  
MA

YT-03-58/SS BDPP

\* TIME 50 STOP  
\*  
\*  
\* RUN # 358 APR 14, 1901 23:02:58  
START

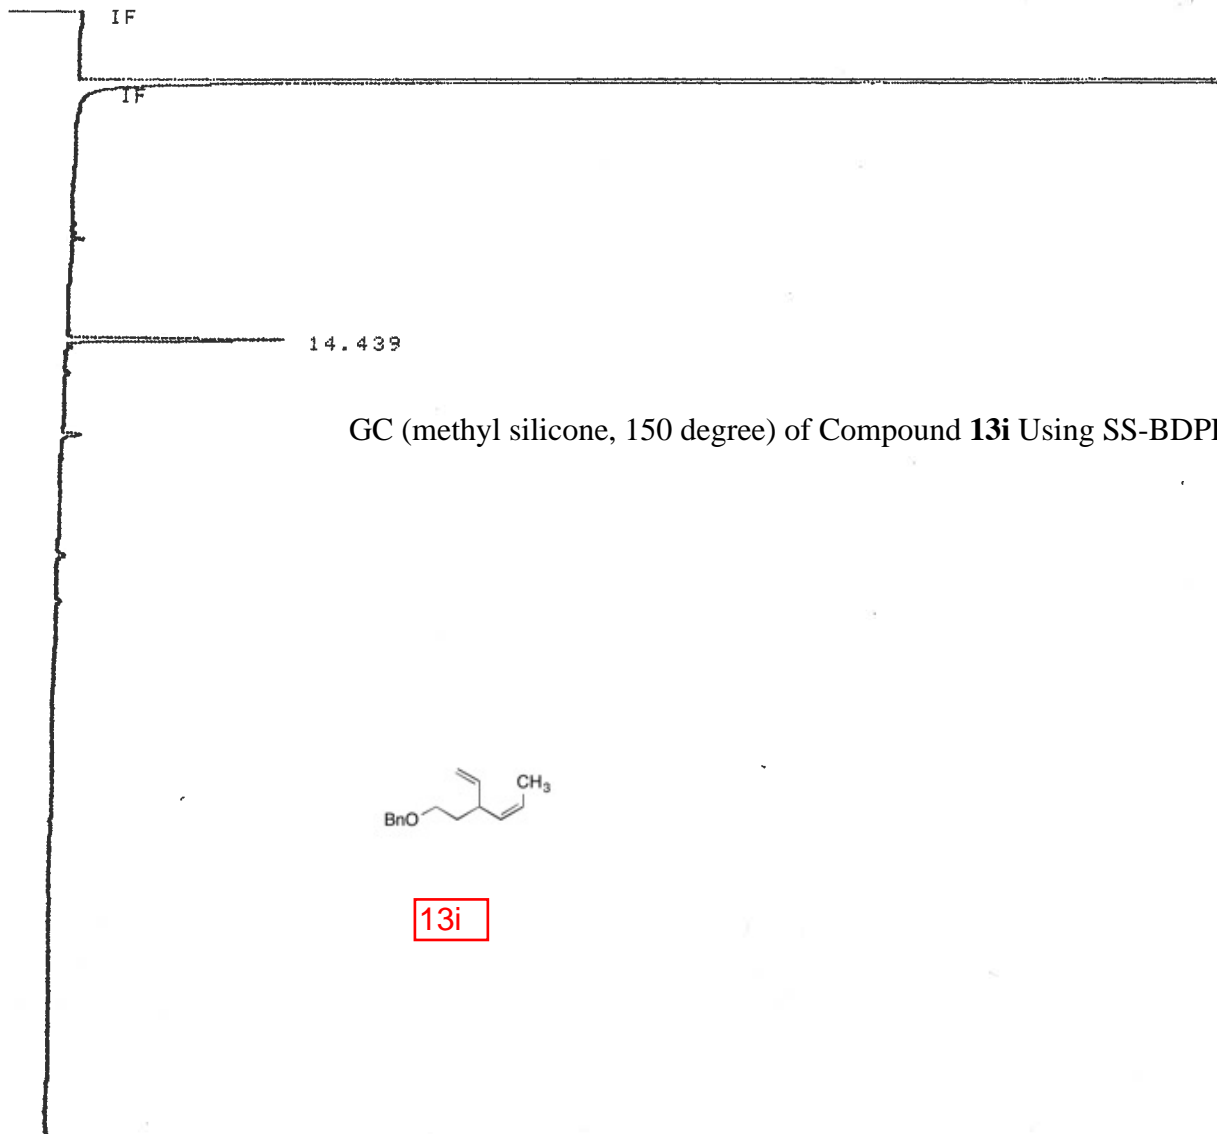

GC (methyl silicone, 150 degree) of Compound **13i** Using SS-BDPP (92%ee)

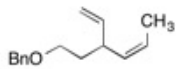

**13i**

TIMETABLE STOP

RUN# 358 APR 14, 1901 23:02:58

| RT     | AREA  | TYPE | WIDTH | AREA%     |
|--------|-------|------|-------|-----------|
| 14.439 | 97878 | PV   | .131  | 100.00000 |

TOTAL AREA= 97878  
MUL FACTOR=1.0000E+00

=====  
Acq. Operator : YAM Seq. Line : 1  
Acq. Instrument : Babu Location : Vial 201  
Injection Date : 2/25/2013 9:13:37 AM Inj : 1  
Inj Volume : 1 µl  
Different Inj Volume from Sequence ! Actual Inj Volume : 3 µl  
Acq. Method : C:\CHEM32\1\DATA\YAM\YT-1-CHIRAL 2013-02-25 09-12-23\YT\_85\_C\_CHIRAL.M  
Last changed : 2/25/2013 9:12:23 AM by YAM  
Analysis Method : C:\CHEM32\1\METHODS\YT\_85\_C\_CHIRAL.M  
Last changed : 2/25/2013 10:22:47 AM by YAM  
(modified after loading)

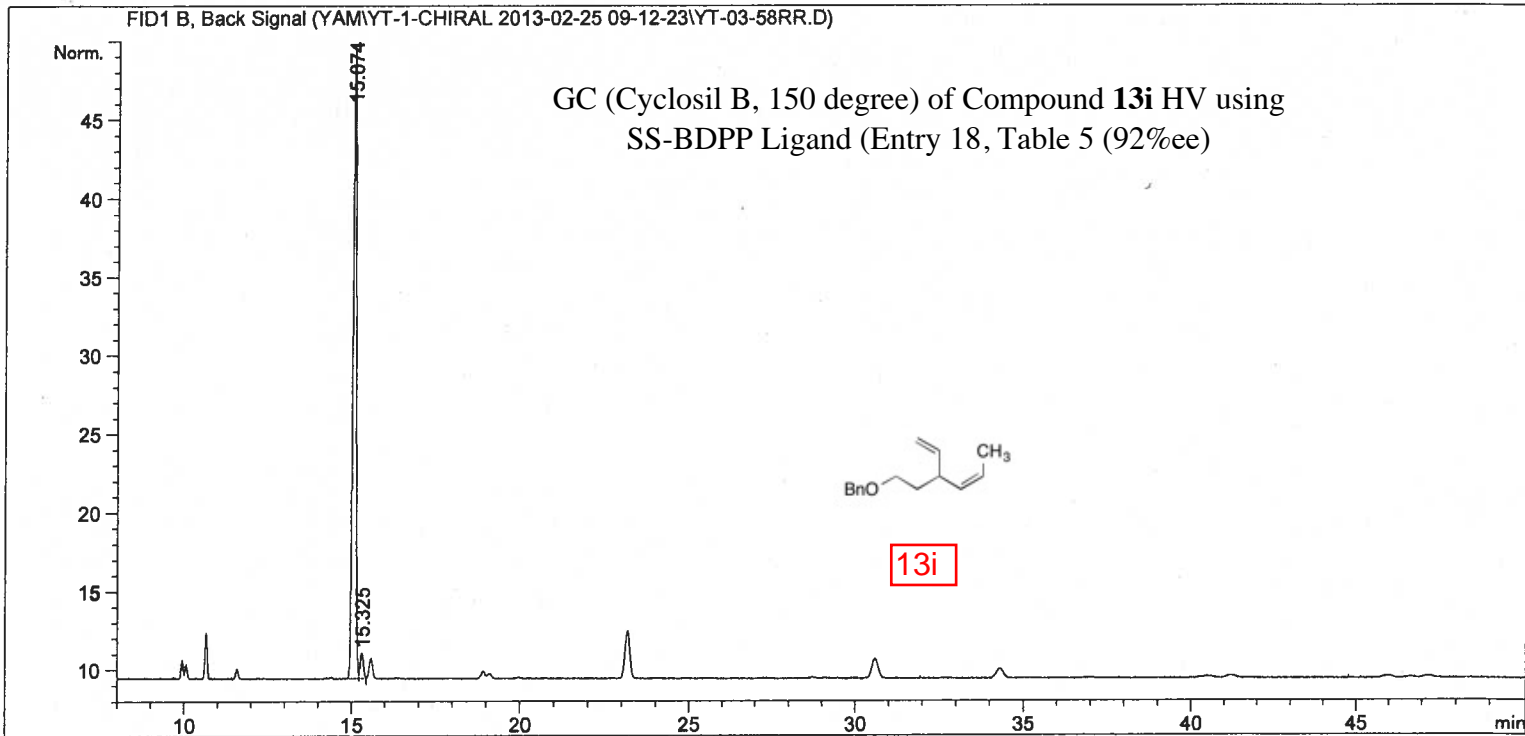

=====  
Area Percent Report  
=====

Sorted By : Signal  
Multiplier: : 1.0000  
Dilution: : 1.0000  
Use Multiplier & Dilution Factor with ISTDs

Signal 1: FID1 B, Back Signal

| Peak # | RetTime [min] | Type | Width [min] | Area [pA*s] | Height [pA] | Area %   |
|--------|---------------|------|-------------|-------------|-------------|----------|
| 1      | 15.074        | BV   | 0.1042      | 265.28748   | 40.19469    | 96.03125 |
| 2      | 15.325        | VV   | 0.1073      | 10.96372    | 1.62892     | 3.96875  |

Totals : 276.25119 41.82362



Proton NMR (400 MHz, D-chloroform) Spectra of Compound **13i**

YT-04-09/dppbcrd<sub>2</sub> TMD  
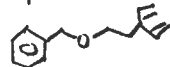

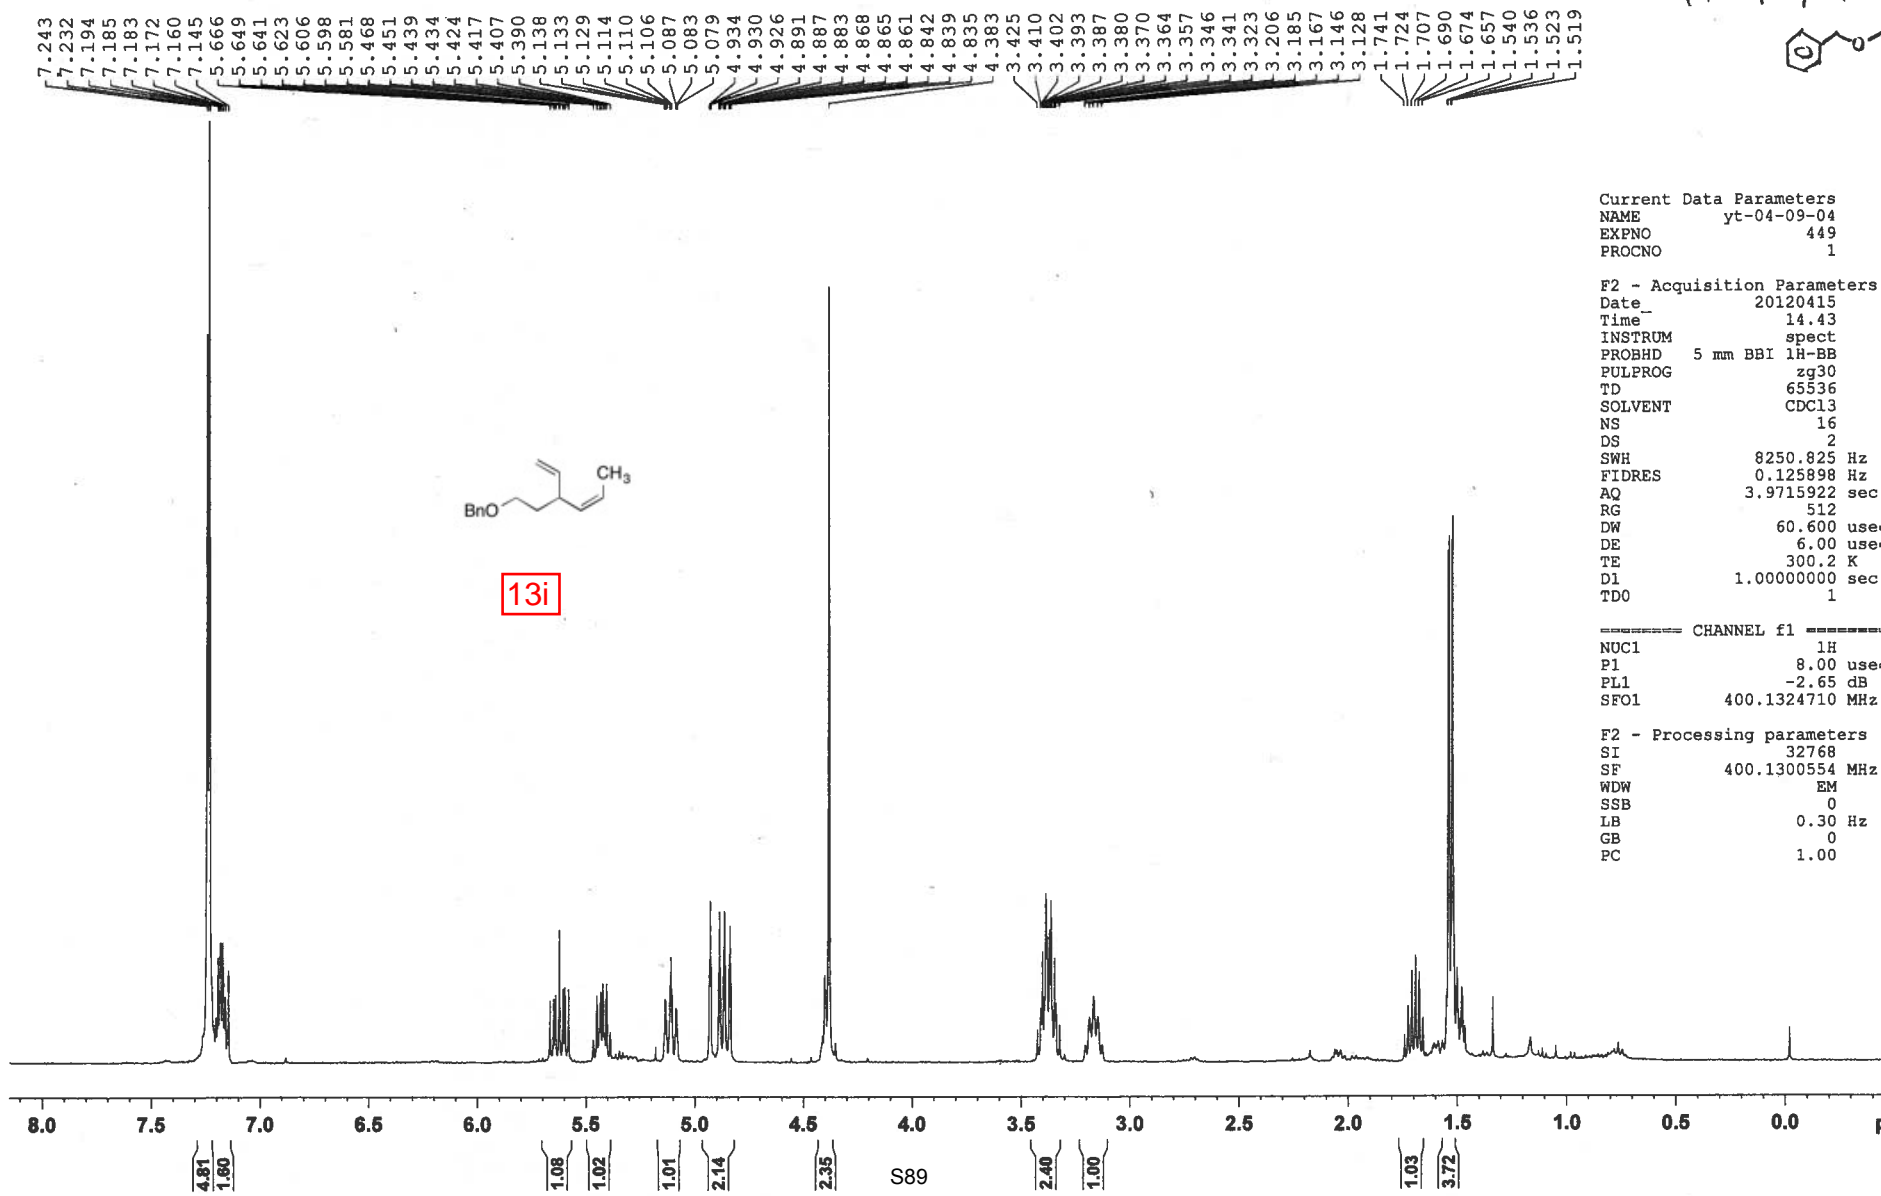

Current Data Parameters  
 NAME yt-04-09-04  
 EXPNO 449  
 PROCNO 1

F2 - Acquisition Parameters  
 Date\_ 20120415  
 Time 14.43  
 INSTRUM spect  
 PROBHD 5 mm BBI 1H-BB  
 PULPROG zg30  
 TD 65536  
 SOLVENT CDCl3  
 NS 16  
 DS 2  
 SWH 8250.825 Hz  
 FIDRES 0.125898 Hz  
 AQ 3.9715922 sec  
 RG 512  
 DW 60.600 usec  
 DE 6.00 usec  
 TE 300.2 K  
 D1 1.00000000 sec  
 TDO 1

===== CHANNEL f1 =====  
 NUC1 1H  
 P1 8.00 usec  
 PL1 -2.65 dB  
 SFO1 400.1324710 MHz

F2 - Processing parameters  
 SI 32768  
 SF 400.1300554 MHz  
 WDW EM  
 SSB 0  
 LB 0.30 Hz  
 GB 0  
 PC 1.00

Proton NMR (400 MHz, D-chloroform) spectrum of Compound **13i** (HV Using SS-DIOP) (Alkene Region Expansion)

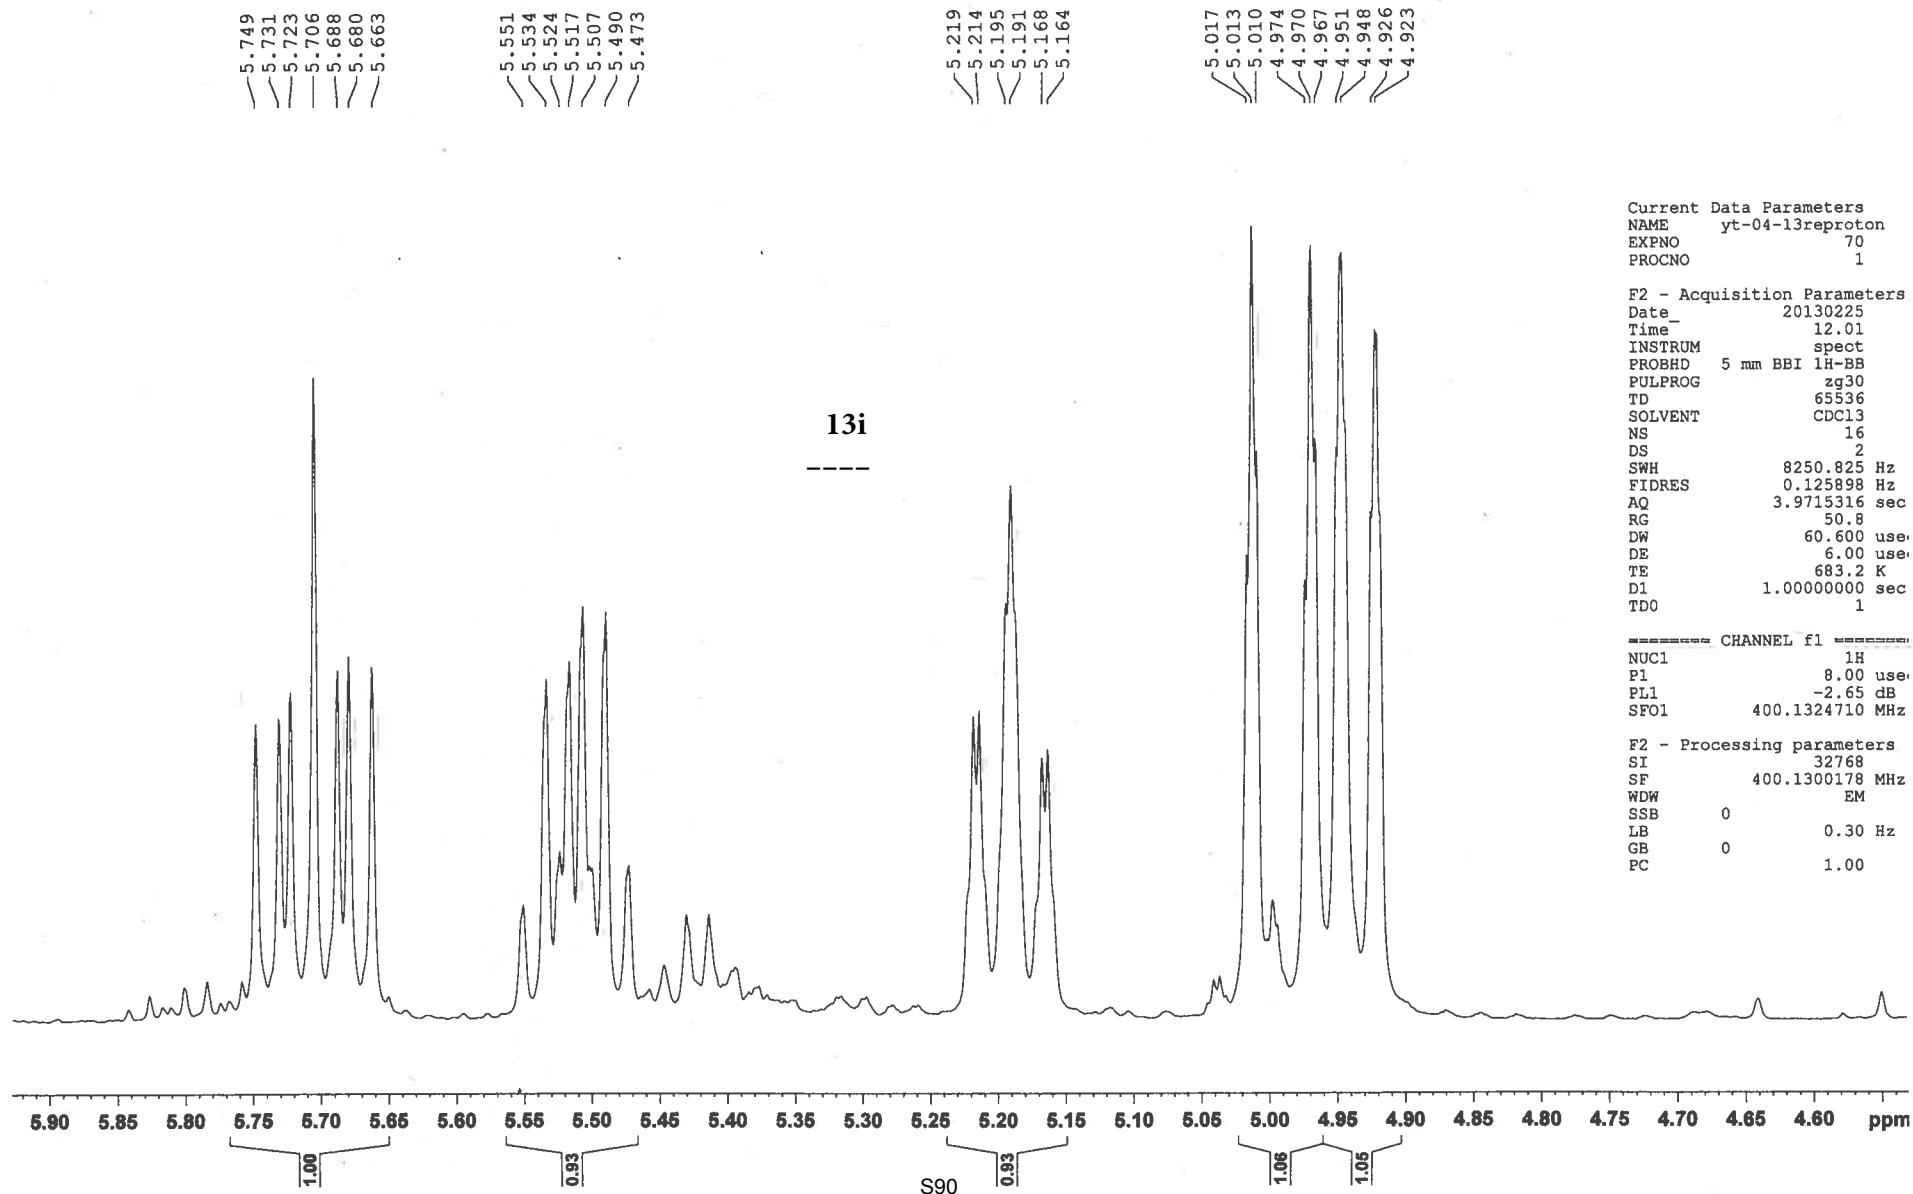

Carbon NMR (400 MHz, D-chloroform) spectrum of Compound **13i** (HV Using SS-DIOP)

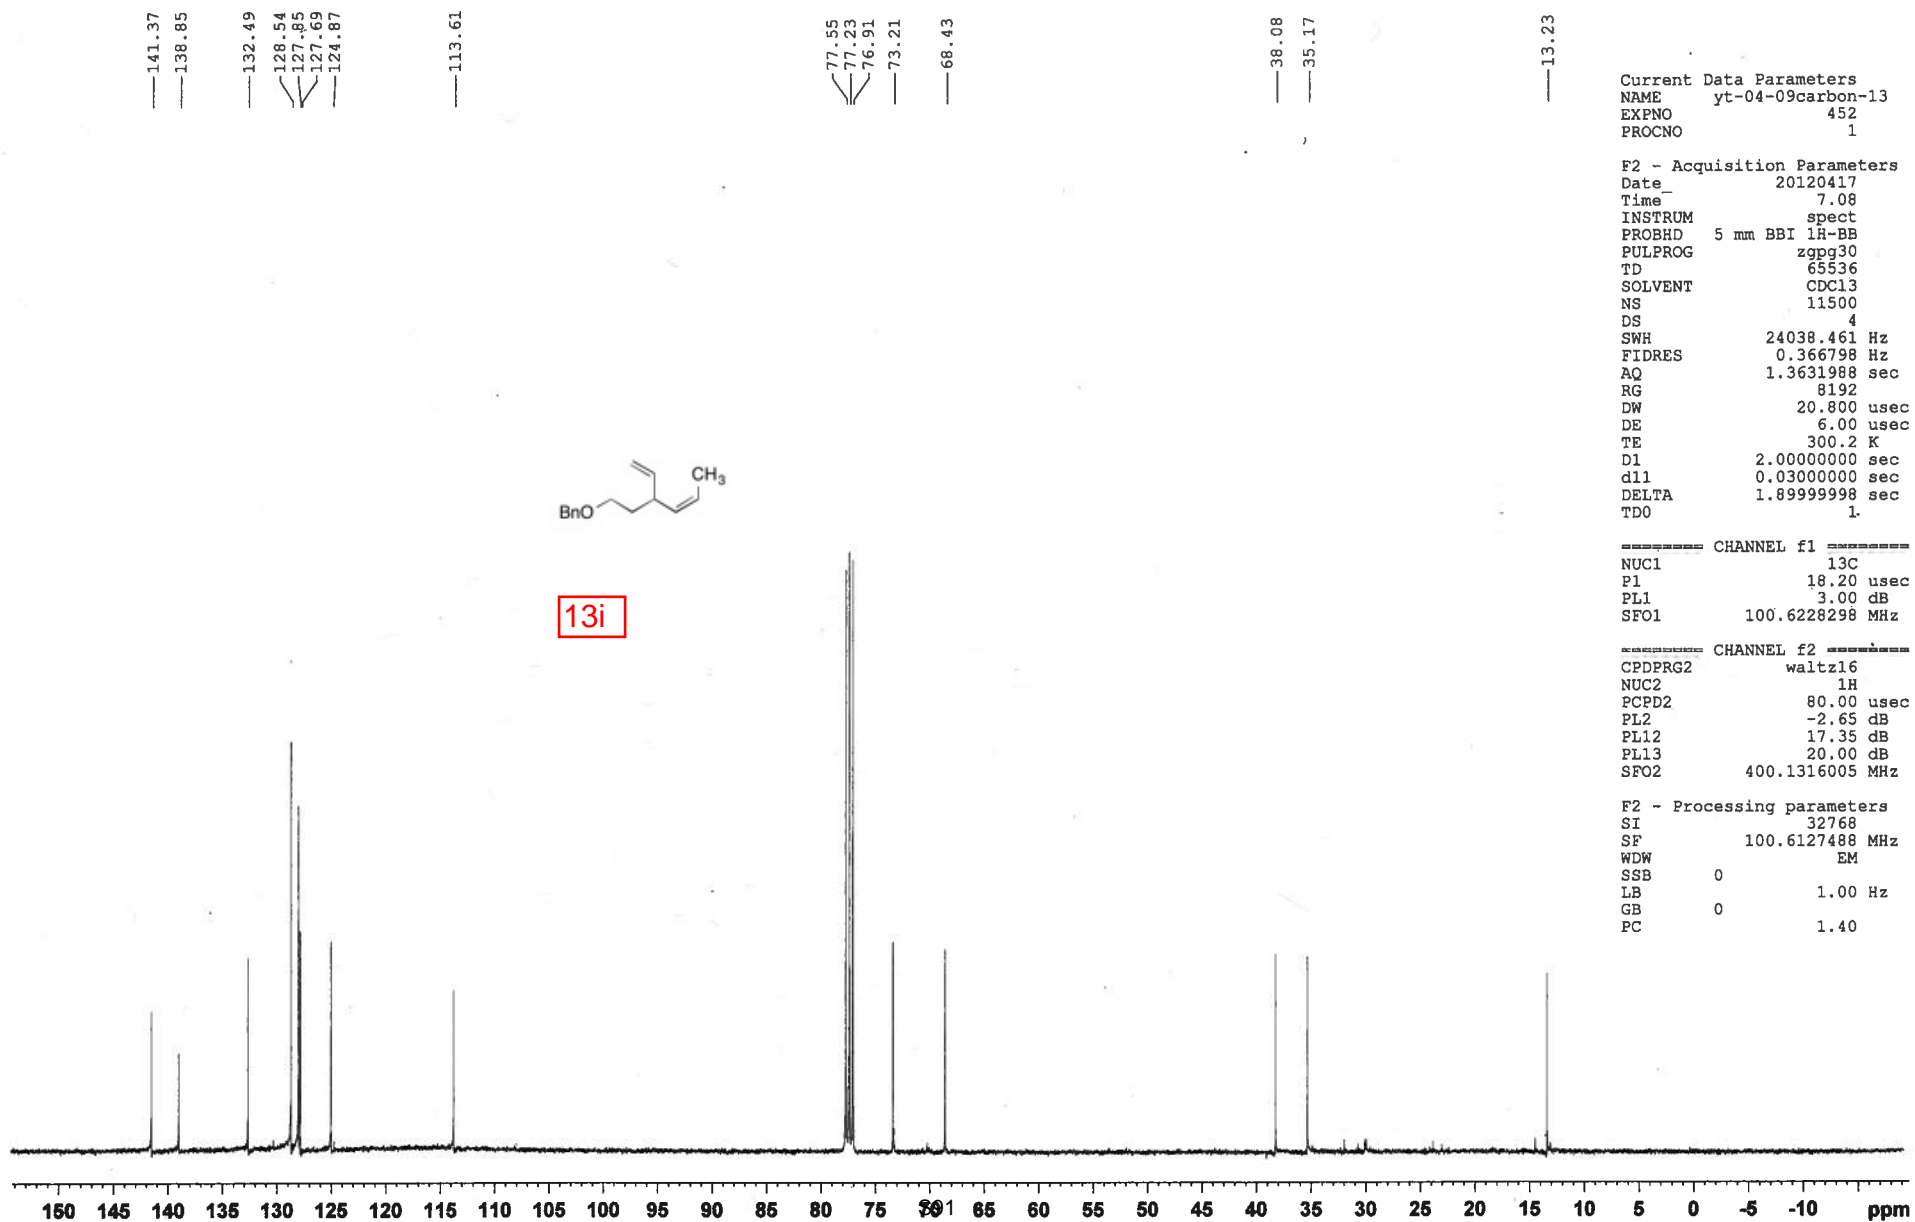

## Hydrovinylation of (*E/Z*)-hexa-3,5-dienylbenzene (**12j**)

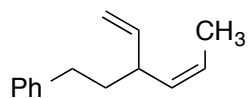

**Hydrovinylation of (*E/Z*)-hexa-3,5-dienylbenzene using [dppb]CoCl<sub>2</sub> (Table 3, Entry 16).** To an oven dried round bottom flask with a sidearm, was added [dppb]CoCl<sub>2</sub> (18 mg, 0.032 mmol) and methylaluminoxane (37 mg, 0.64 mmol) under argon. The color of the solution changed from deep blue to red brown with the formation of white fumes over the addition of dichloromethane solvent (1 mL). After 2 to 3 minutes, the reaction vessel was carefully evacuated and then refilled with ethylene balloon. The reaction vessel was kept at -10 °C and (*E/Z*)-hexa-3,5-dienylbenzene (52 mg, 0.32 mmol), mixture of *E:Z* in the ratio of 53:47, was added via syringe under ethylene and the mixture was stirred for 8 h. The ethylene balloon was removed and 0.1 mL methanol was added into the flask. The reaction solution was diluted with pentane (2 mL) and warmed to room temperature and subsequently passed through a silica plug. The plug was washed with pentane (3 x 5 mL). Removal of the solvent yielded the product as colorless oil (51 mg, 84%). GC and NMR analysis showed that the product (**13j**) was essentially pure. <sup>1</sup>H NMR (CDCl<sub>3</sub>, 400 MHz): 1.58 (dd, J = 7, 2 Hz, 3 H), 1.57 – 1.74 (m, 1 H), 1.75 – 1.79 (m, 1 H), 2.54 – 2.63 (m, 2 H), 3.03 - 3.06 (m, 1 H), 4.94 – 5.02 (m, 2 H), 5.22 - 5.29 (m, 1 H), 5.49 – 5.58 (m, 1 H), 5.72 (ddd, J = 17, 10, 7 Hz, 1 H), 7.14 – 7.27 (m, 5 H, aromatic). <sup>13</sup>C NMR (CDCl<sub>3</sub>, 125.02 MHz): 13.33, 33.64, 37.14, 41.03, 113.65, 124.72, 125.87, 128.49, 128.67, 132.91, 141.56, 142.72.

Gas Chromatography: CSP GC (Cyclosil, OT 100 °C/ isothermal, H<sub>2</sub> carrier gas): starting material R<sub>T</sub> = 37.70 min. for *E*-diene and 36.07 min. for *Z* diene. R<sub>T</sub> for product = 54.64 min and 57.65 min (racemic).

Sample Name: YT-06-122.D

```

=====
Acq. Operator   : YAM                               Seq. Line :    1
Acq. Instrument : Babu                             Location  : Vial 201
Injection Date  : 4/4/2014 12:31:15 PM             Inj       :    1
                                                    Inj Volume: 1 µl
Different Inj Volume from Sequence !   Actual Inj Volume : 4 µl
Acq. Method    : C:\CHEM32\1\DATA\DUVVURI\YT-1-CHIRAL 2014-04-04 12-30-08\YT_85_C_CHIRAL.M
Last changed   : 4/4/2014 12:30:06 PM by YAM
Analysis Method : C:\CHEM32\1\METHODS\YT_85_C_CHIRAL.M
Last changed   : 4/4/2014 12:30:06 PM by YAM
=====

```

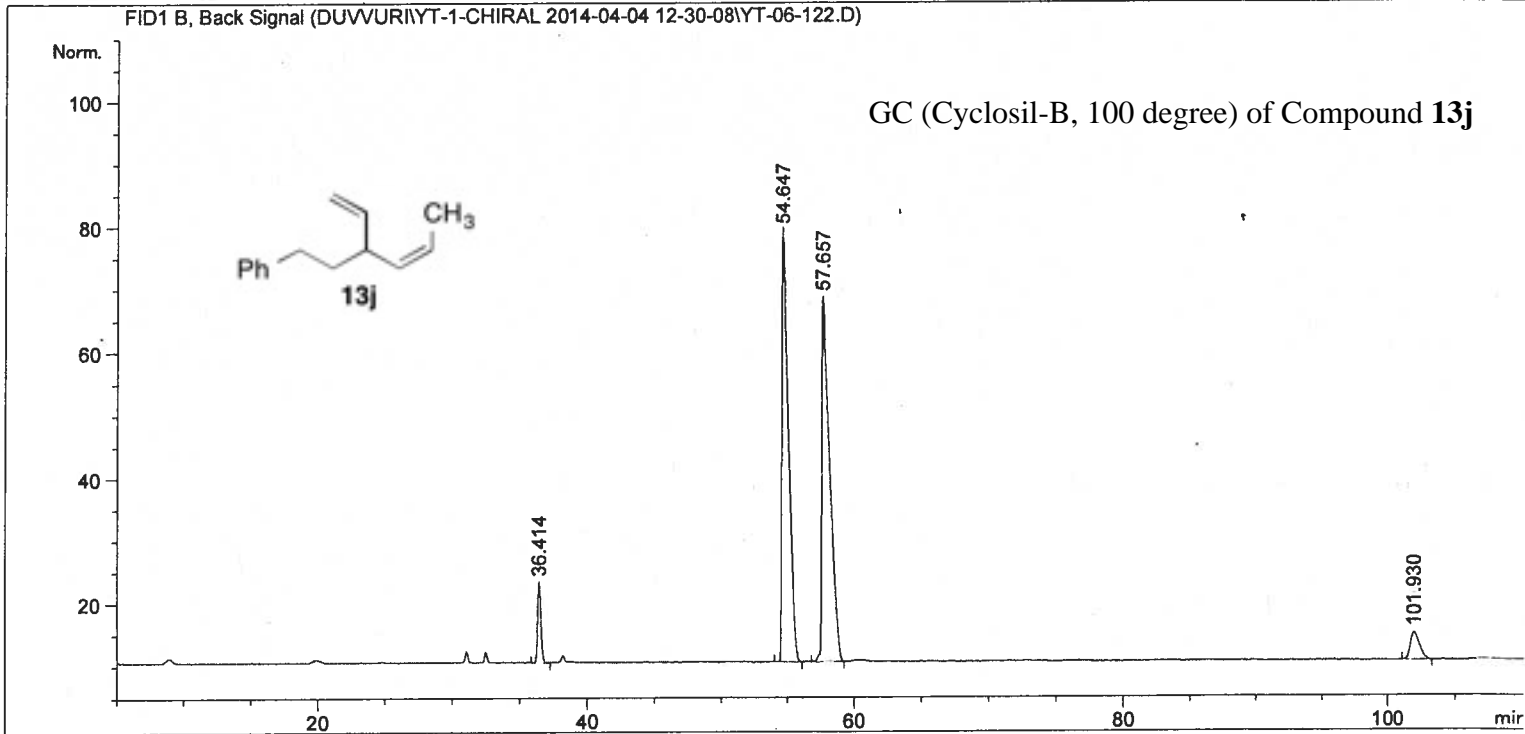

```

=====
                          Area Percent Report
=====

```

```

Sorted By           :      Signal
Multiplier:         :      1.0000
Dilution:           :      1.0000
Use Multiplier & Dilution Factor with ISTDs

```

Signal 1: FID1 B, Back Signal

| Peak # | RetTime [min] | Type | Width [min] | Area [pA*s] | Height [pA] | Area %   |
|--------|---------------|------|-------------|-------------|-------------|----------|
| 1      | 36.414        | BB   | 0.2539      | 217.92847   | 12.84430    | 4.19654  |
| 2      | 54.647        | BB   | 0.4428      | 2367.73975  | 68.85545    | 45.59434 |
| 3      | 57.657        | BB   | 0.5236      | 2403.51611  | 58.17712    | 46.28327 |
| 4      | 101.930       | BB   | 0.5638      | 203.87204   | 4.34213     | 3.92586  |

Proton NMR (400 MHz, D-Chloroform) spectrum of compound **13j** (HV using Cl<sub>2</sub>Co(DPPB) (Entry 16, Table 3)

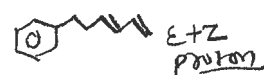

7.269  
7.254  
7.236  
7.232  
7.190  
7.160  
7.153  
7.148  
7.139  
7.136  
5.766  
5.749  
5.740  
5.723  
5.706  
5.697  
5.680  
5.560  
5.558  
5.550  
5.548  
5.543  
5.541  
5.533  
5.531  
5.527  
5.516  
5.514  
5.285  
5.280  
5.261  
5.257  
5.253  
5.234  
5.230  
5.023  
5.019  
5.015  
4.980  
4.974  
4.972  
4.967  
4.948  
4.945  
4.941  
3.064  
3.045  
3.026  
2.625  
2.610  
2.599  
2.585  
2.581  
2.573  
2.562  
2.557  
2.538  
1.787  
1.778  
1.770  
1.762  
1.753  
1.745  
1.738  
1.729  
1.713  
1.673  
1.591  
1.587  
1.574  
1.570

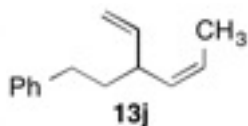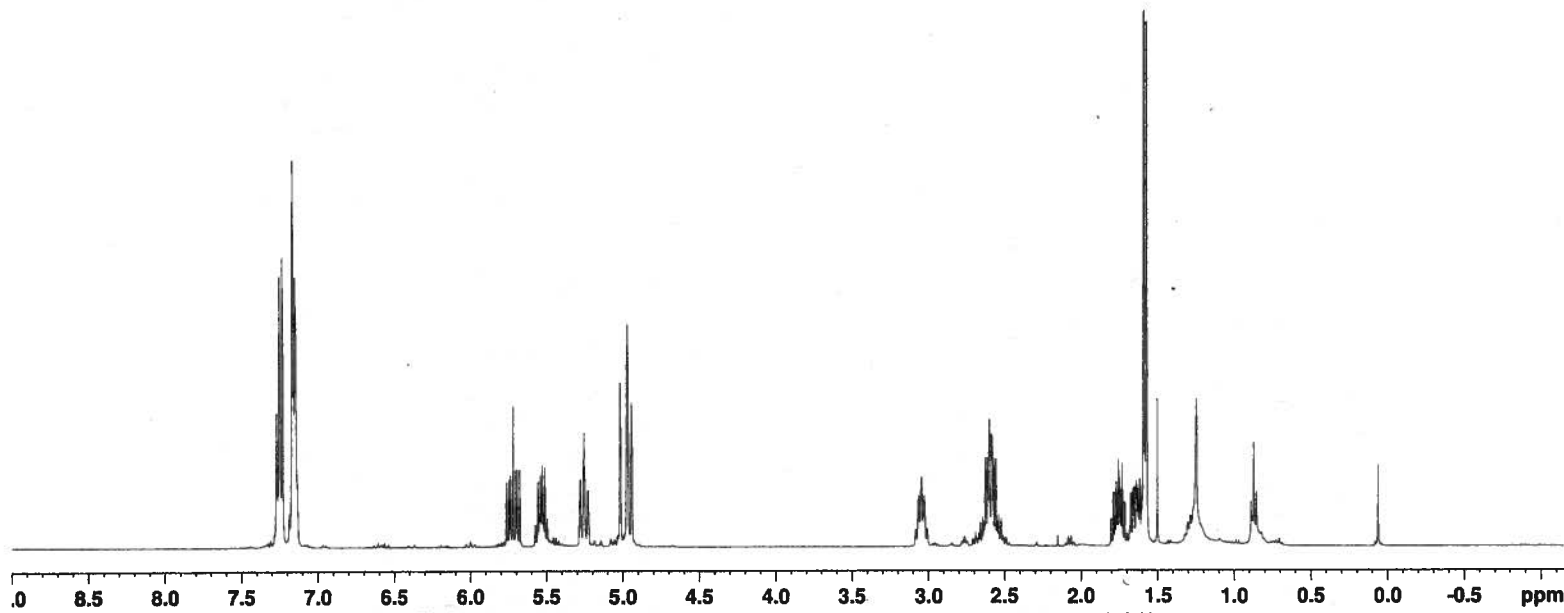

2.41  
3.30  
0.05  
0.02  
0.02  
0.05  
1.01  
1.03  
0.98  
2.11  
1.00  
0.94  
2.31  
1.11  
1.08  
3.11

Current Data Parameters  
NAME YT-06-122  
EXPNO 1  
PROCNO 1

F2 - Acquisition Parameters  
Date\_ 20140404  
Time 19.17  
INSTRUM spect  
PROBHD 5 mm PABBO BB/  
PULPROG zg30  
TD 65536  
SOLVENT CDCl3  
NS 16  
DS 2  
SWH 8223.685 Hz  
FIDRES 0.125483 Hz  
AQ 3.9845889 sec  
RG 112.47  
DW 60.800 use  
DE 6.50 use  
TE 300.0 K  
D1 1.00000000 sec  
TD0 1

===== CHANNEL f1 =====  
NUC1 1H  
P1 15.00 use  
PLW1 12.52000046 W  
SF01 400.1724712 MHz

F2 - Processing parameters  
SI 65536  
SF 400.1700196 MHz  
WDW EM  
SSB 0  
LB 0.30 Hz  
GB 0  
PC 1.00

Proton NMR (400 MHz, D-Chloroform) spectrum of compound **13j** (HV using Cl<sub>2</sub>Co(DPPB)(Alkene Region Expansion))

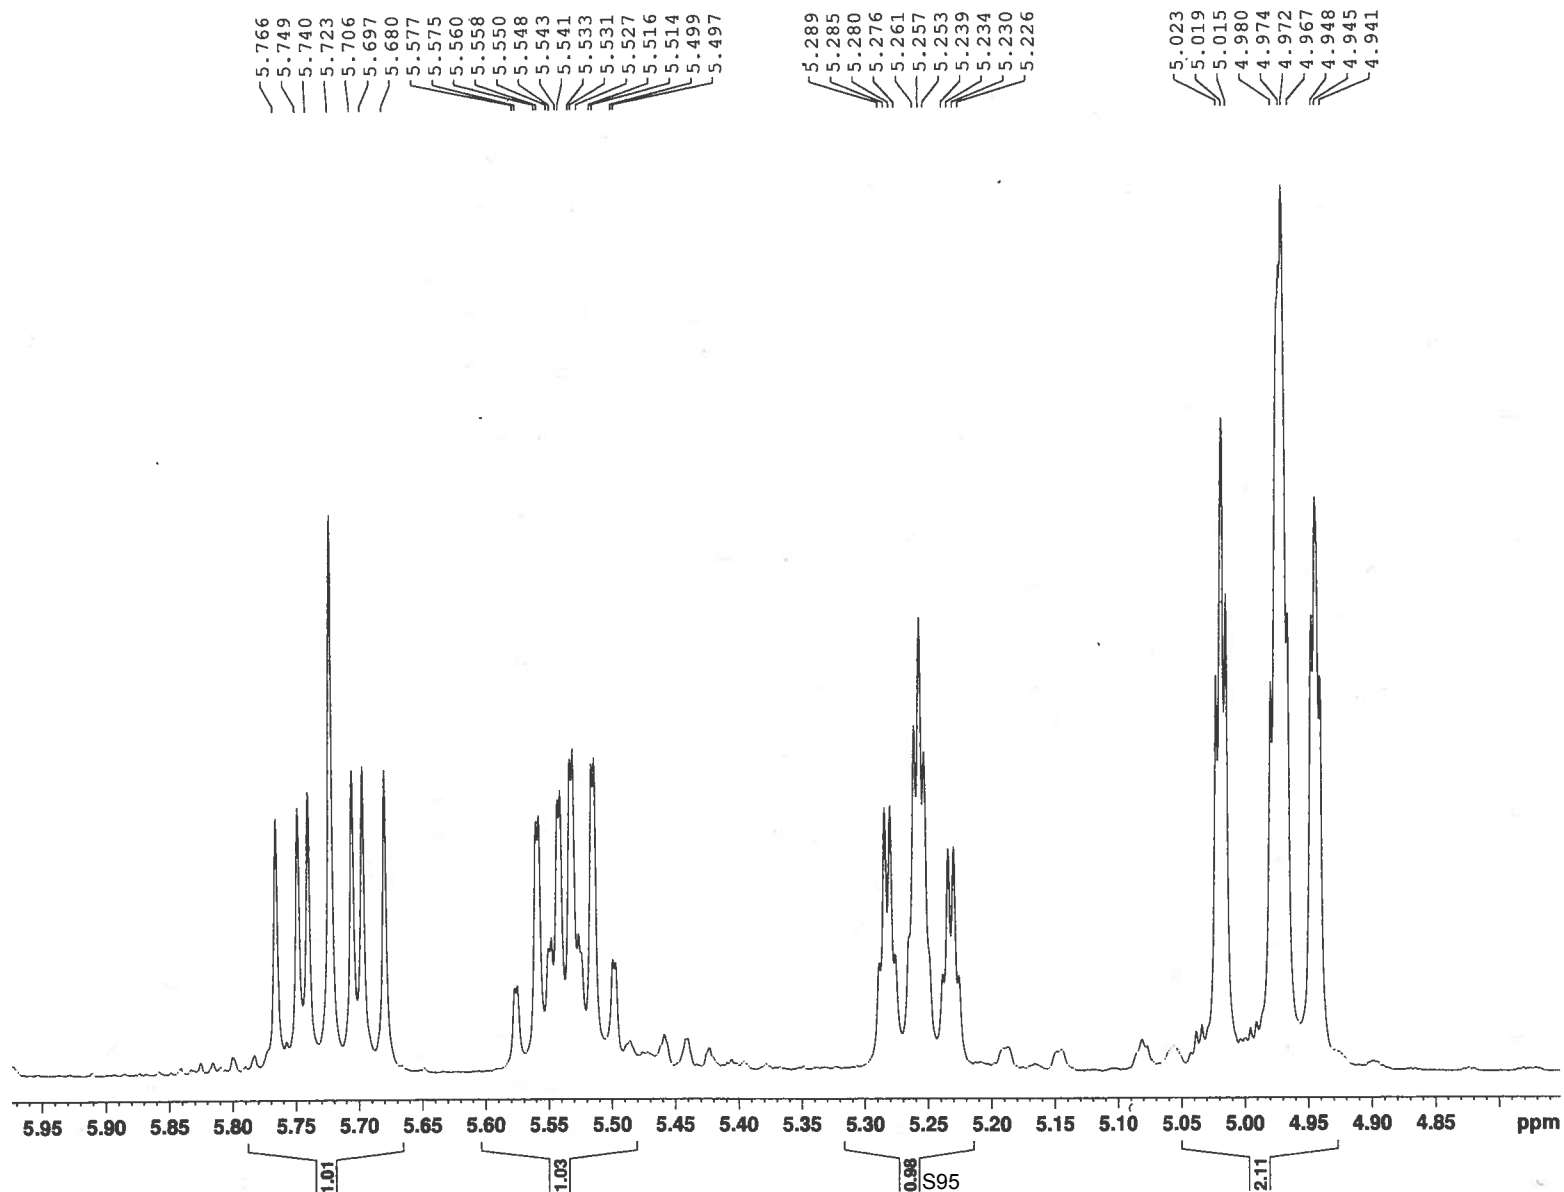

5.766  
5.749  
5.740  
5.723  
5.706  
5.697  
5.680  
5.577  
5.575  
5.560  
5.558  
5.550  
5.548  
5.543  
5.541  
5.533  
5.531  
5.527  
5.516  
5.514  
5.499  
5.497

5.289  
5.285  
5.280  
5.276  
5.261  
5.257  
5.253  
5.239  
5.234  
5.230  
5.226

5.023  
5.019  
5.015  
4.980  
4.974  
4.972  
4.967  
4.948  
4.945  
4.941

```

Current Data Parameters
NAME          YT-06-122
EXPNO         1
PROCNO        1

F2 - Acquisition Parameters
Date_         20140404
Time          19.17
INSTRUM       spect
PROBHD        5 mm PABBO BB/
PULPROG       zg30
TD            65536
SOLVENT       CDCl3
NS            16
DS            2
SWH           8223.685 Hz
FIDRES        0.125483 Hz
AQ            3.9845889 sec
RG            112.47
DW            60.800 use
DE            6.50 use
TE            300.0 K
D1            1.00000000 sec
TD0           1

===== CHANNEL f1 =====
NUC1          1H
P1            15.00 use
PLW1          12.52000046 W
SFO1          400.1724712 MHz

F2 - Processing parameters
SI            65536
SF            400.1700196 MHz
WDW           EM
SSB           0
LB            0.30 Hz
GB            0
PC            1.00
    
```

Carbon NMR (400 MHz, D-chloroform) spectrum of compound 13j (HV using Cl<sub>2</sub>Co(DPPB))

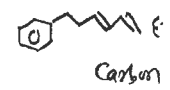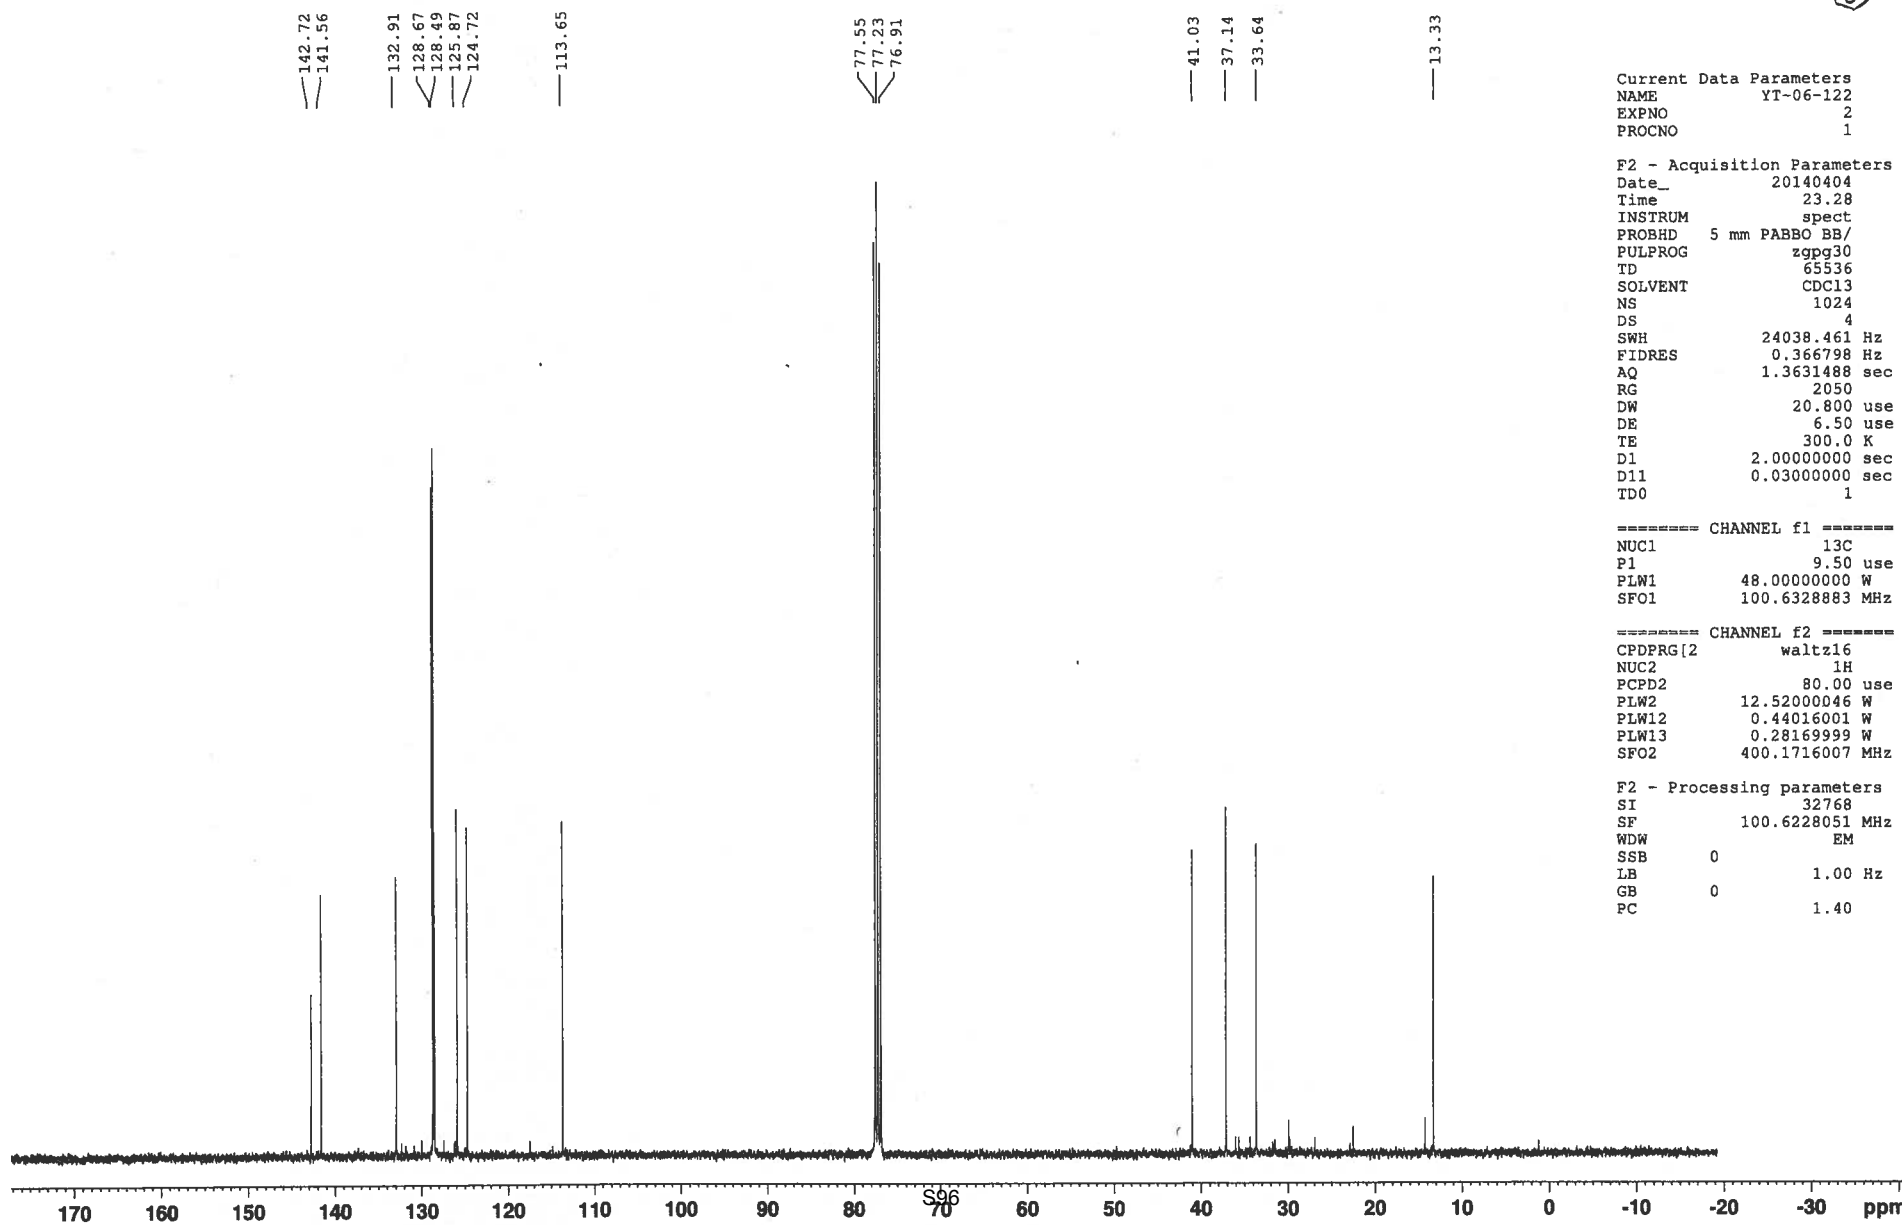

```

Current Data Parameters
NAME      YT-06-122
EXPNO     2
PROCNO    1

F2 - Acquisition Parameters
Date_     20140404
Time      23.28
INSTRUM   spect
PROBHD    5 mm PABBO BB/
PULPROG   zgpg30
TD         65536
SOLVENT   CDCl3
NS         1024
DS         4
SWH        24038.461 Hz
FIDRES     0.366798 Hz
AQ         1.3631488 sec
RG         2050
DW         20.800 use
DE         6.50 use
TE         300.0 K
D1         2.0000000 sec
D11        0.0300000 sec
TD0        1

===== CHANNEL f1 =====
NUC1       13C
P1         9.50 use
PLW1       48.0000000 W
SFO1       100.6328883 MHz

===== CHANNEL f2 =====
CPDPRG[2] waltz16
NUC2       1H
PCPD2      80.00 use
PLW2       12.52000046 W
PLW12      0.44016001 W
PLW13      0.28169999 W
SFO2       400.1716007 MHz

F2 - Processing parameters
SI         32768
SF         100.6228051 MHz
WDW        EM
SSB        0
LB         1.00 Hz
GB         0
PC         1.40
    
```



## Hydrovinylation of (*E*)-4-(buta-1,3-dienyl)-*N,N*-dimethylaniline (**12k**)

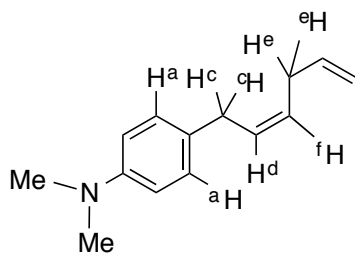

### Hydrovinylation of (*E*)-4-(buta-1,3-dienyl)-*N,N*-

**dimethylaniline using DPPBCoCl<sub>2</sub> (Table 3, Entry 17):** To an oven dried round bottom flask with a sidearm, was added [DPPB]CoCl<sub>2</sub> (36 mg, 0.065 mmol) and methylaluminoxane (76 mg, 1.30 mmol) under argon. The color of the solution changed from deep blue to red brown with the formation of white fumes over the addition of dichloromethane solvent (1 mL). After 2 to 3 minutes, the reaction vessel was carefully evacuated and then

refilled with ethylene balloon. The reaction vessel was kept at 0 °C and (*E*)-4-(buta-1,3-dienyl)-*N,N*-dimethylaniline (113 mg, 0.65 mmol) in dichloromethane (1 mL) added via syringe under ethylene and the mixture was stirred for 13 h at ambient temperature. The ethylene balloon was removed and 0.1 mL methanol was added into the flask. The reaction solution was diluted with pentane (2 mL) and diethyl ether (2 mL) and warmed to room temperature. After this, the reaction solution was subsequently passed through a silica plug. The plug was washed with diethyl ether (3 X 5 mL). Flash column chromatography with (5:1, hexane: ethyl acetate) yielded the product as yellowish oil (104 mg, 79%). GC and NMR analysis showed that the product (**16k**) was essentially pure. <sup>1</sup>H NMR (CDCl<sub>3</sub>, 400 MHz): 2.91 (s, 6 H), 2.91 - 2.95 (overlap with 2.91) (m, 2 H), 3.32 (d, J = 7 Hz, 2 H), 5.01 (dq, J = 10, 1.6 Hz, 1 H), 5.09 (dq, J = 17, 1.6 Hz, 1 H), 5.47 - 5.54 (m, 1 H), 5.59 - 5.67 (m, 1 H), 5.86 (ddt, J = 17, 10, 6 Hz, 1 H), 6.72 (d, J = 8 Hz, 2 H, aromatic), 7.07 (d, J = 9 Hz, 2 H, aromatic).

<sup>13</sup>C NMR (CDCl<sub>3</sub>, 125.02 MHz): 31.71, 32.60, 41.25, 113.52, 114.99, 127.14, 129.15, 130.32, 137.13.

Gas Chromatography: Methylsilicone SP GC (OT 150 °C/ isothermal, He carrier gas): R<sub>T</sub> for product = 23.02 min. R<sub>T</sub> for starting material = 18.68 min. ESI-MS; m/z 202.1593 [M + H]; mass calculated for C<sub>14</sub>H<sub>20</sub>N<sub>1</sub>, 202.1590.

START

IF

IF

GC (HP-5 methyl silicone, 150 degree) of Compound **16k**  
(Entry 17, Table 3)

23.015

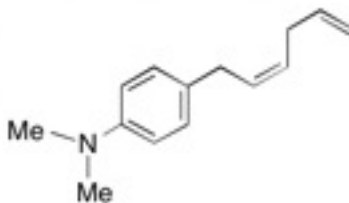

STOP

RUN# 165 MAR 1, 1901 00:09:44

AREA%

| RT     | AREA   | TYPE | WIDTH | AREA%     |
|--------|--------|------|-------|-----------|
| 23.015 | 258275 | BP   | .205  | 100.00000 |

TOTAL AREA= 258275

MUL FACTOR=1.0000E+00

Current Data Parameters  
 NAME yt-04-178rs12pure  
 EXPNO 1  
 PROCNO 1

F2 - Acquisition Parameters  
 Date\_ 20130108  
 Time\_ 11.08  
 INSTRUM spect  
 PROBHD 5 mm BBI 1H-BB  
 PULPROG zg30  
 TD 65536  
 SOLVENT CDC13  
 NS 16  
 DS 2  
 SWH 8250.825 Hz  
 FIDRES 0.125898 Hz  
 AQ 3.9715316 sec  
 RG 45.3  
 DW 60.600 usec  
 DE 6.00 usec  
 TE 300.2 K  
 D1 1.00000000 sec  
 ID0 1

===== CHANNEL f1 =====  
 NUC1 1H  
 P1 8.00 usec  
 PL1 -2.65 dB  
 SFO1 400.1324710 MHz

F2 - Processing parameters  
 SI 32768  
 SF 400.1300174 MHz  
 WDW EM  
 SSB 0  
 LB 0.30 Hz  
 SB 0  
 PC 1.00

7.079  
 7.057  
 6.731  
 6.710  
 5.911  
 5.896  
 5.886  
 5.880  
 5.870  
 5.853  
 5.843  
 5.838  
 5.828  
 5.812  
 5.668  
 5.664  
 5.661  
 5.649  
 5.646  
 5.642  
 5.638  
 5.634  
 5.628  
 5.623  
 5.619  
 5.616  
 5.604  
 5.601  
 5.597  
 5.537  
 5.534  
 5.530  
 5.519  
 5.516  
 5.511  
 5.507  
 5.501  
 5.497  
 5.493  
 5.489  
 5.485  
 5.474  
 5.471  
 5.467  
 5.115  
 5.110  
 5.106  
 5.101  
 5.072  
 5.067  
 5.063  
 5.059  
 5.029  
 5.025  
 5.021  
 5.017  
 5.004  
 5.000  
 4.996  
 4.992  
 3.329  
 3.311  
 2.949  
 2.934  
 2.910

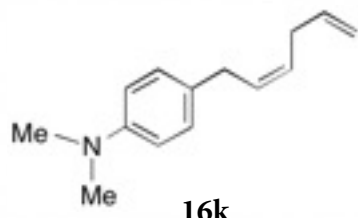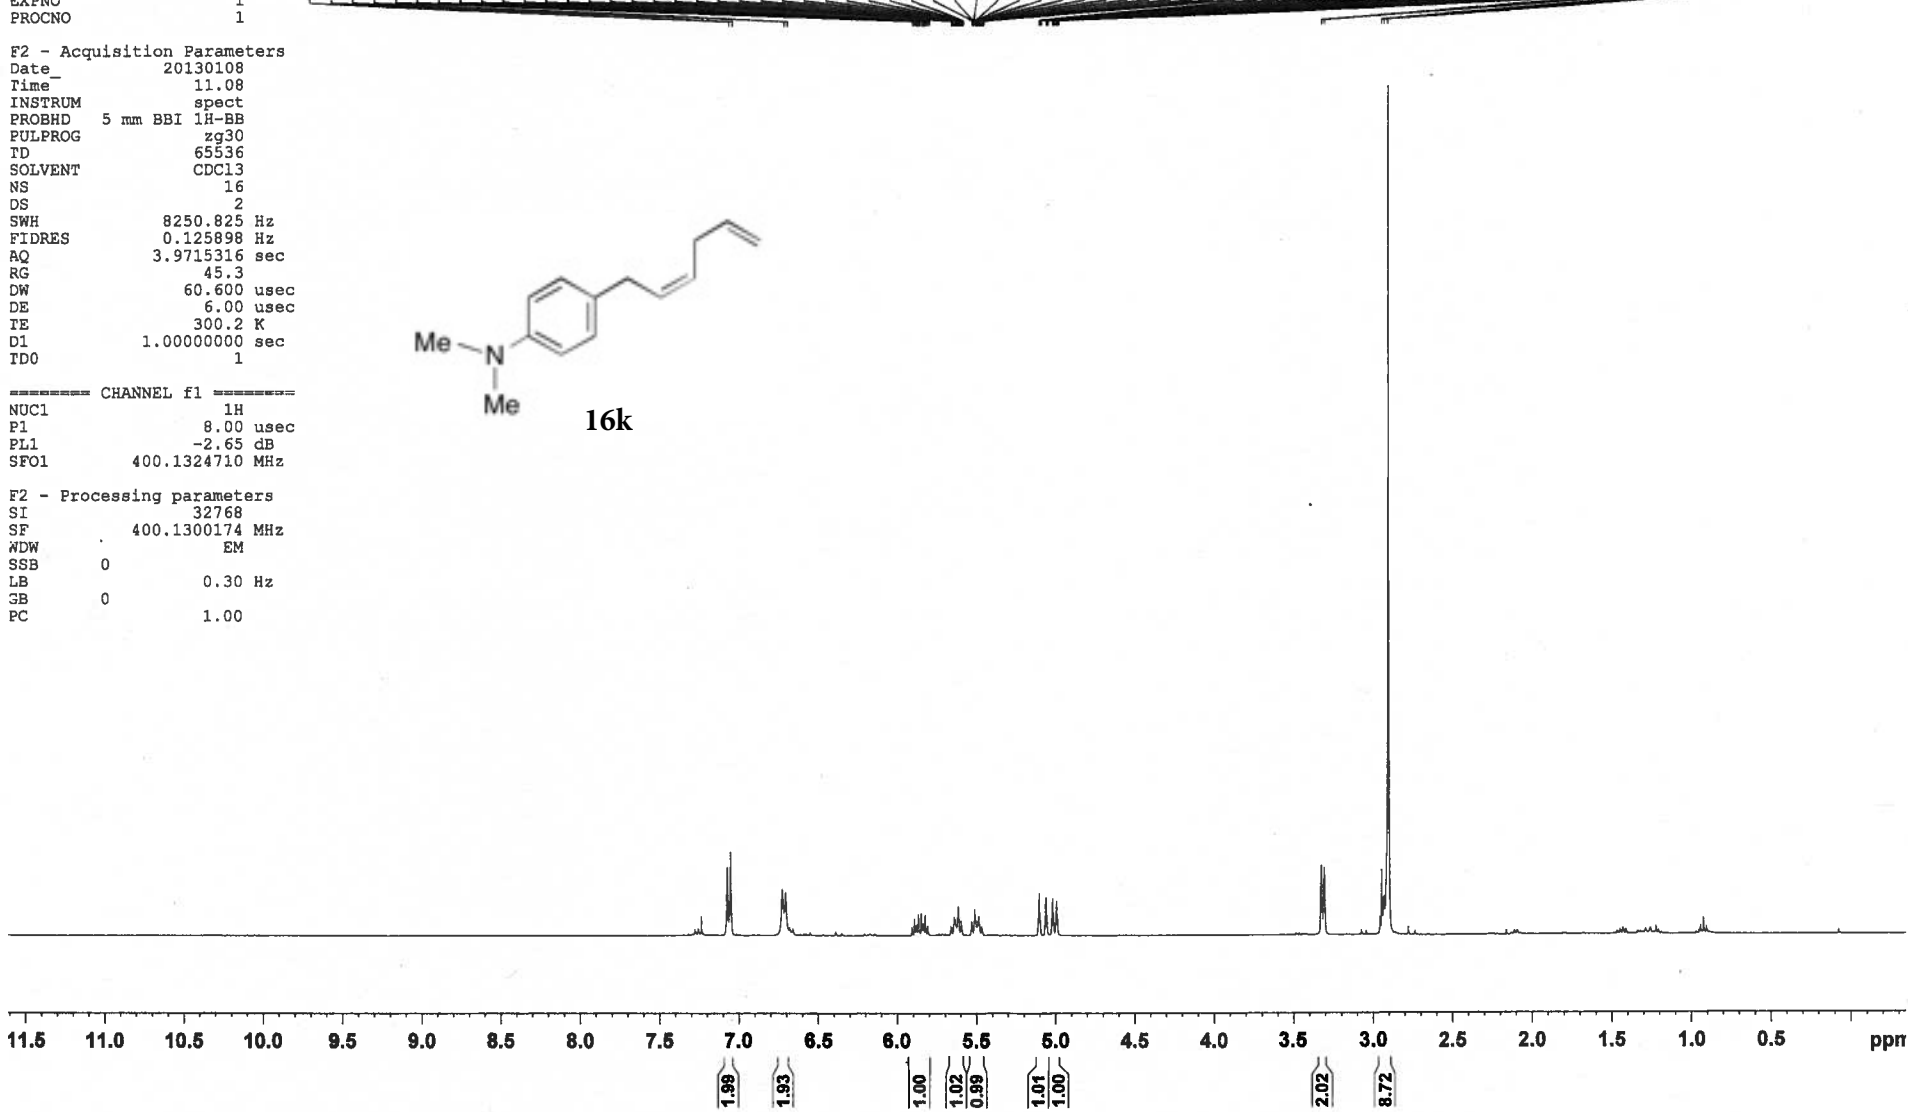

Proton NMR (400 MHz, D-Chloroform) Spectra of Compound **16k**  
 (Entry 17, Table 3)

Proton NMR (400 MHz, D-chloroform) spectrum of compound **16k**

Current Data Parameters  
 NAME yt-04-178rel2pure  
 EXPNO 1  
 PROCNO 1

F2 - Acquisition Parameters  
 Date\_ 20130108  
 Time\_ 11.08  
 INSTRUM spect  
 PROBHD 5 mm BBI 1H-BB  
 PULPROG zg30  
 ID 65536  
 SOLVENT CDCl3  
 NS 16  
 DS 2  
 SWH 8250.825 Hz  
 FIDRES 0.125898 Hz  
 AQ 3.9715316 sec  
 RG 45.3  
 DW 60.600 usec  
 DE 6.00 usec  
 TE 300.2 K  
 D1 1.00000000 sec  
 TDO 1

===== CHANNEL f1 =====  
 NUC1 1H  
 P1 8.00 usec  
 PL1 -2.65 dB  
 SFO1 400.1324710 MHz

F2 - Processing parameters  
 SI 32768  
 SF 400.1300174 MHz  
 WDW EM  
 SSB 0  
 LB 0.30 Hz  
 GB 0  
 PC 1.00

5.911  
5.896  
5.886  
5.880  
5.870  
5.853  
5.843  
5.838  
5.828  
5.812  
5.668  
5.664  
5.661  
5.649  
5.646  
5.642  
5.638  
5.634  
5.628  
5.623  
5.619  
5.616  
5.604  
5.601  
5.597  
5.537  
5.534  
5.530  
5.519  
5.516  
5.511  
5.507  
5.501  
5.497  
5.493  
5.489  
5.485  
5.474  
5.471  
5.467  
5.115  
5.110  
5.106  
5.101  
5.072  
5.067  
5.063  
5.059  
5.029  
5.025  
5.021  
5.017  
5.004  
5.000  
4.996  
4.992

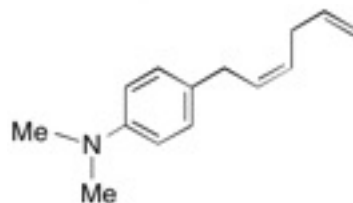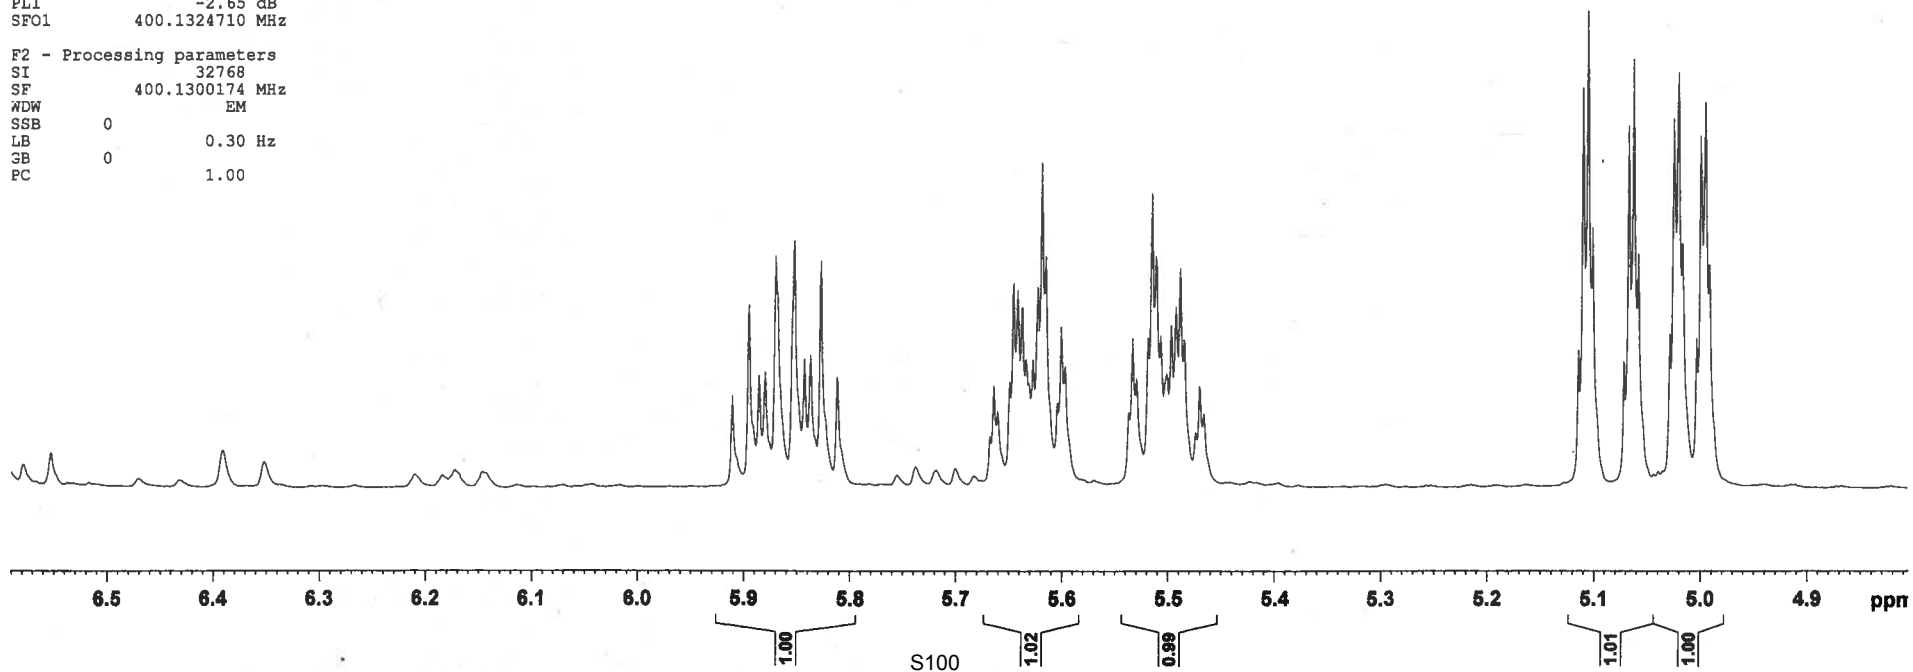

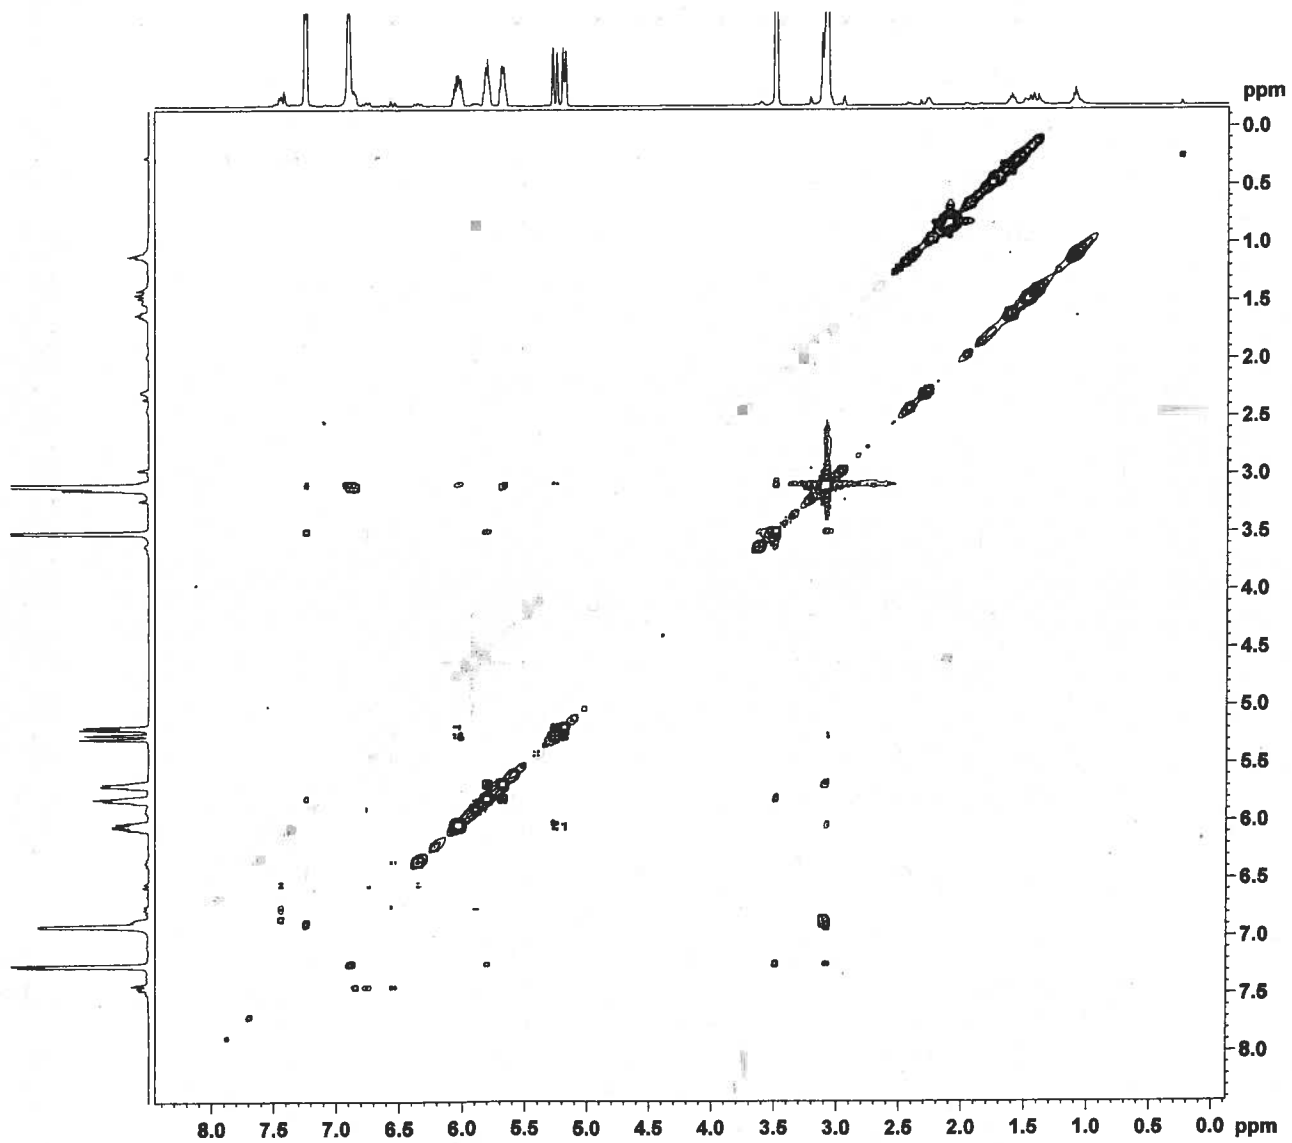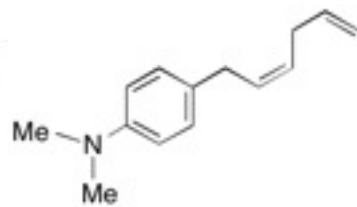

# Carbon NMR (125 MHz, D-Chloroform) Spectra of Compound **16k**

Current Data Parameters  
 NAME yt-04-178rel2pure carbon  
 EXPNO 16  
 PROCNO 1

F2 - Acquisition Parameters  
 Date\_ 20130108  
 Time 9.55  
 INSTRUM spect  
 PROBHD 5 mm Multinucl  
 PULPROG zgpg30  
 ID 65536  
 SOLVENT CDCl3  
 NS 704  
 DS 4  
 SWH 30030.029 Hz  
 FIDRES 0.458222 Hz  
 AQ 1.0912244 sec  
 RG 3251  
 DW 16.650 usec  
 DE 6.00 usec  
 TE 300.2 K  
 D1 2.00000000 sec  
 d11 0.03000000 sec  
 DELTA 1.89999998 sec  
 MCREST 0 sec  
 MCWRK 0.01500000 sec

===== CHANNEL f1 =====  
 NUC1 13C  
 P1 14.00 usec  
 PL1 -1.00 dB  
 SFO1 125.7376725 MHz

===== CHANNEL f2 =====  
 CPDPRG2 waltz16  
 NUC2 1H  
 PCPD2 68.00 usec  
 PL2 -1.00 dB  
 PL12 10.87 dB  
 PL13 22.50 dB  
 SFO2 500.0020000 MHz

F2 - Processing parameters  
 SI 32768  
 SF 125.7250777 MHz  
 WDW EM  
 SSB 0  
 LB 1.00 Hz  
 GB 0  
 PC 1.40

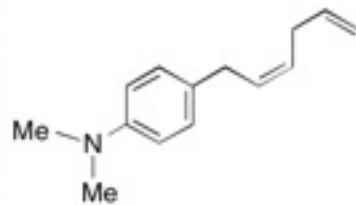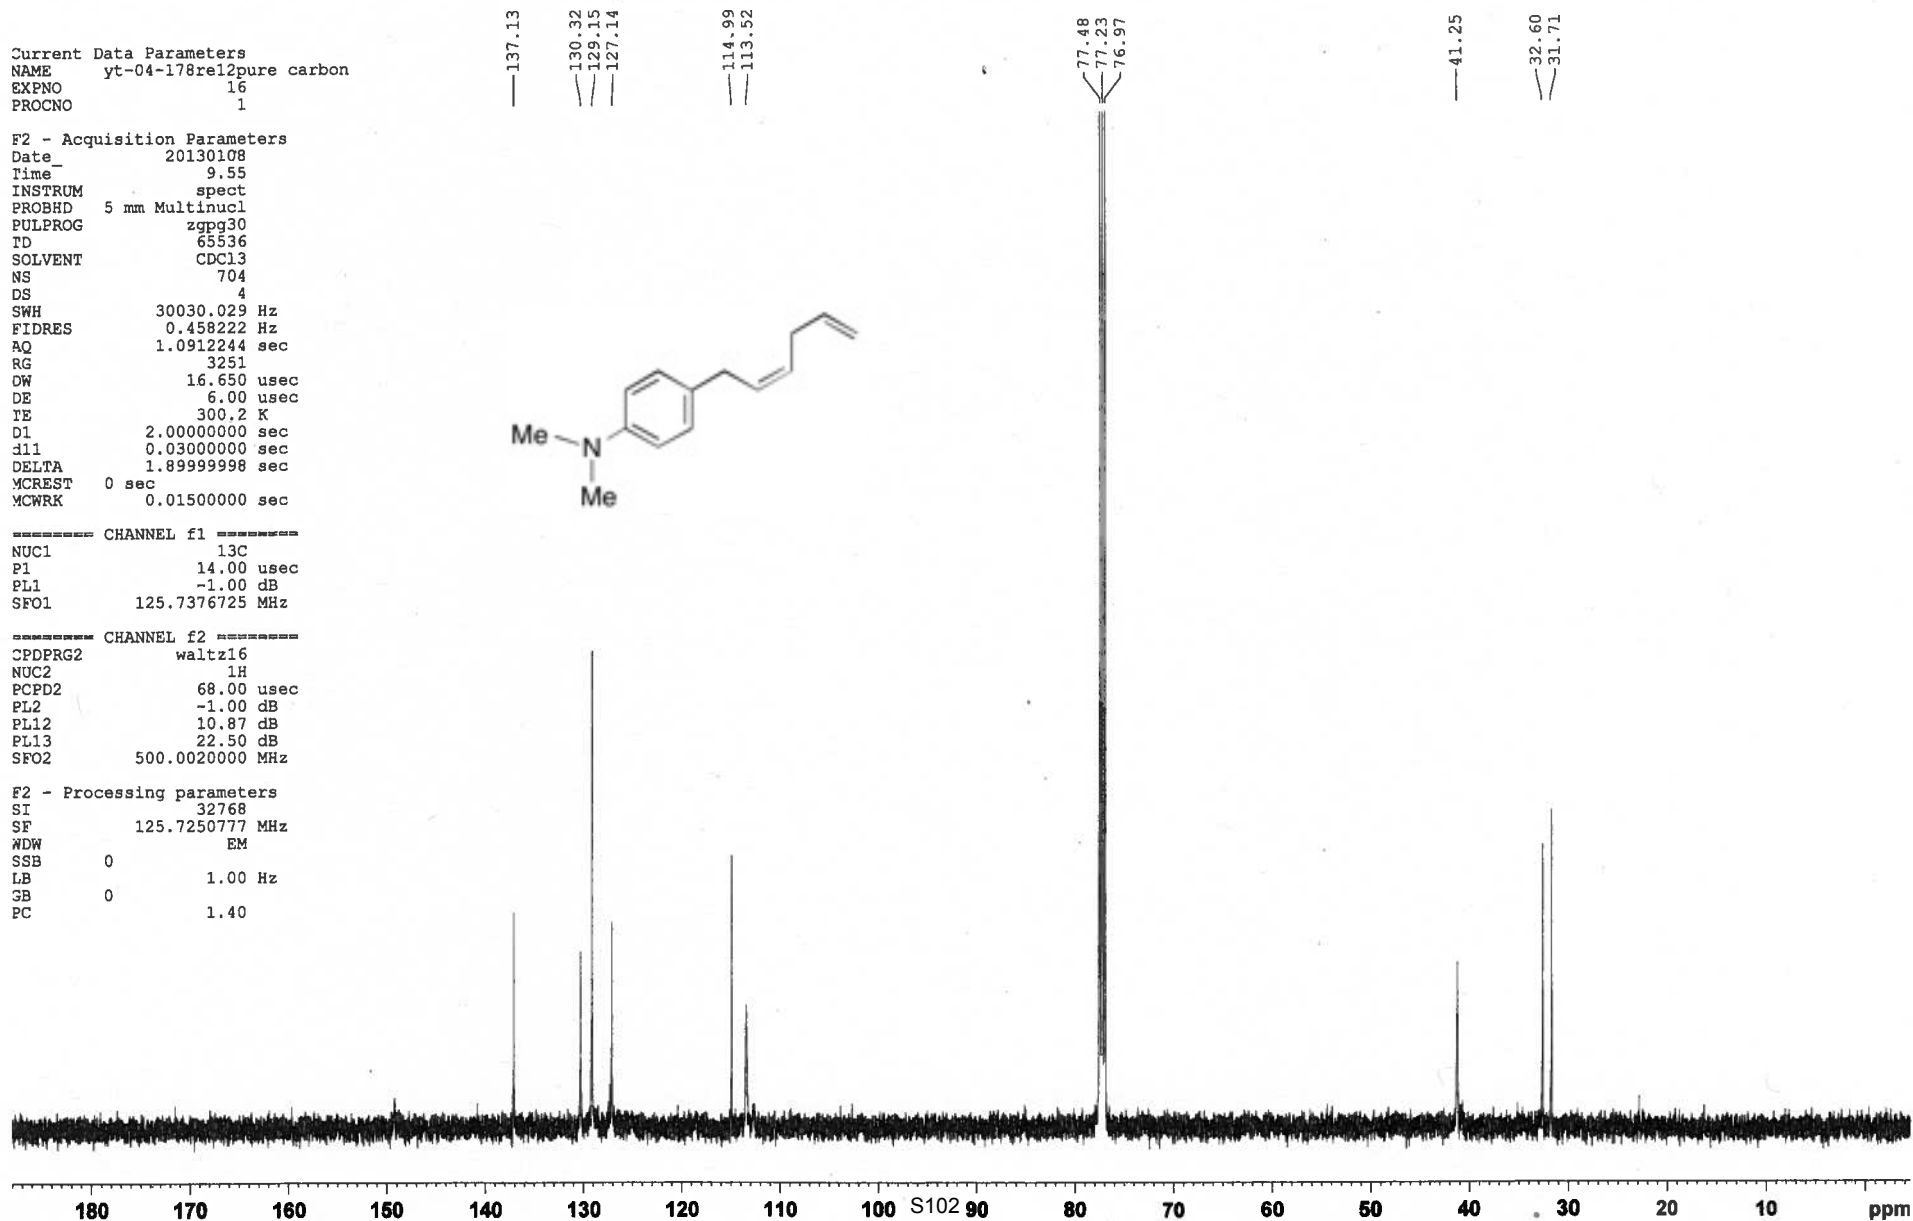

## Hydrovinylation of (*E*)-1-phenyl-2-methyl-1,3-butadiene (**12l**)

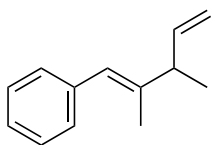

**Hydrovinylation of (*E*)-1-phenyl-2-methyl-1,3-butadiene using [dppm]CoCl<sub>2</sub> (Table 3, Entry 18 and 19).** To an oven-dried 10 mL round-bottom flask with a sidearm, was added [dppm]CoCl<sub>2</sub> (35.6 mg, 0.0693 mmol) under argon and it was dissolved in a mixture of degassed dichloromethane (4.0 mL) and toluene (1 mL), at 0 °C. Trimethylaluminum solution (2M) in toluene (15.0 mg, 104  $\mu$ l, 0.208 mmol) was added dropwise as color of the solution changed from green to brown with the formation of white fumes over the solution. When all the fumes disappeared, the reaction vessel was carefully evacuated and then refilled with ethylene from a balloon. The filled balloon was used to maintain the ethylene atmosphere, while a vigorous reaction with evolution of fumes was observed. This evolution stopped in typically within 5 min. The reaction vessel was cooled to -10 °C and (*E*)-2-methyl-1-phenyl-1,3-butadiene (100.0 mg, 0.6935 mmol) was added under ethylene and the mixture was stirred for 6 h (color of the reaction solution turned dark green again at the end of the reaction). The ethylene balloon was removed and 0.2 mL of methanol was introduced into the flask and stirring was continued for 5 minutes. The solution was warmed to room temperature and was subsequently passed through a silica plug. The plug was washed with hexane (3 X 20 mL). Concentration and removal of last traces of solvent yielded the product as a colorless oil (**15l**, 116.9 mg; 97 %). Isomeric compositions were determined by gas chromatography and NMR spectroscopy. <sup>1</sup>H NMR (CDCl<sub>3</sub>, 500 MHz): 1.184 (d, 7 Hz, 3 H), 1.816 (dd, 1.5, 1.5, 3 H), 2.922 (m, 1 H), 5.044 (dm, 17 Hz, 1 H), 5.009 (dm, 12 Hz, 1 H), 6.295 (s, 1H), 5.842 (ddd, 17, 11, 1.5), 6.295 (s, 1 H), 7.10-7.30 (m, aromatic). NOESY: PhCH  $\rightarrow$  C<sub>sp3</sub>-CH<sub>3</sub>, bis-allylic CH. <sup>13</sup>C NMR (CDCl<sub>3</sub>): 15.72, 18.16, 46.88, 113.71, 124.61, 125.98, 128.05, 128.98, 138.61, 141.84, 142.31.

Since the HV product itself could not be separated on Cyclodex-B column, further derivatization was employed to prepare an alcohol, which was analyzed as the TMS ether. The hydrocarbon **15l** was subjected to hydroboration/oxidation using 9-BBN and the enantiomeric mixture of alcohols were converted into the corresponding -TMS ethers which were analyzed on Cyclodex-B column. The product was ascertained to be nearly racemic. Optical rotation measurements further confirmed these observations.

\* RUN # 589 APR 18, 1901 10:52:03

START

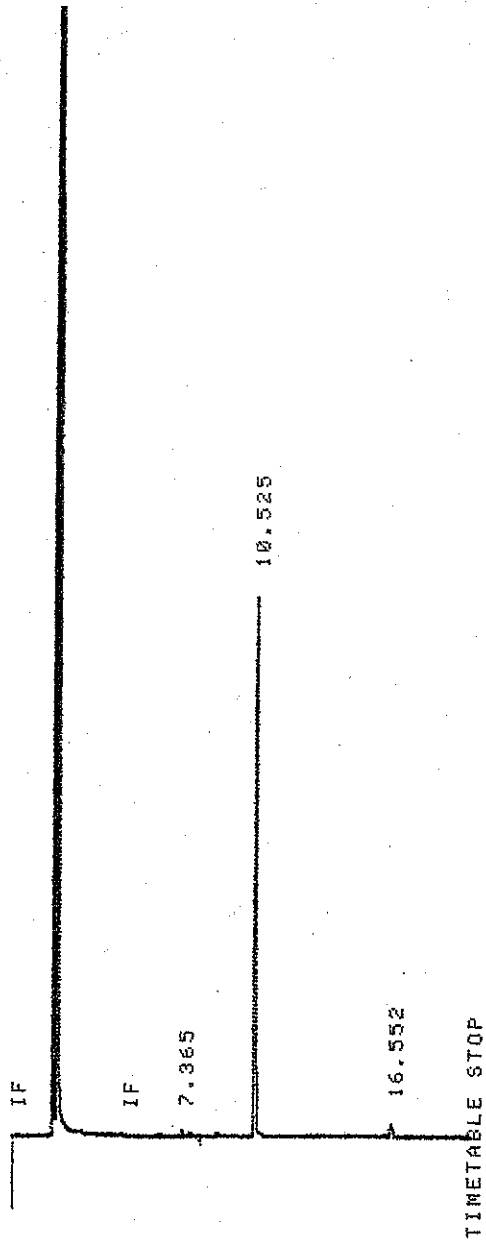

RUN# 589 APR 18, 1901 10:52:03

| AREA%    | RT     | AREA   | TYPE | WIDTH | AREA%    |
|----------|--------|--------|------|-------|----------|
| 96.16272 | 10.525 | 305659 | PV   | .082  | 96.16272 |
| 3.83727  | 16.552 | 12197  | PV   | .131  | 3.83727  |

TOTAL AREA= 317856  
MUL FACTOR=1.0000E+00

(Entry 18, Table 3)

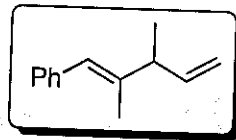

150°C  
(Polydimethylsiloxane)

\* \* \* \* \*



dppmco<sub>2</sub>/TMA

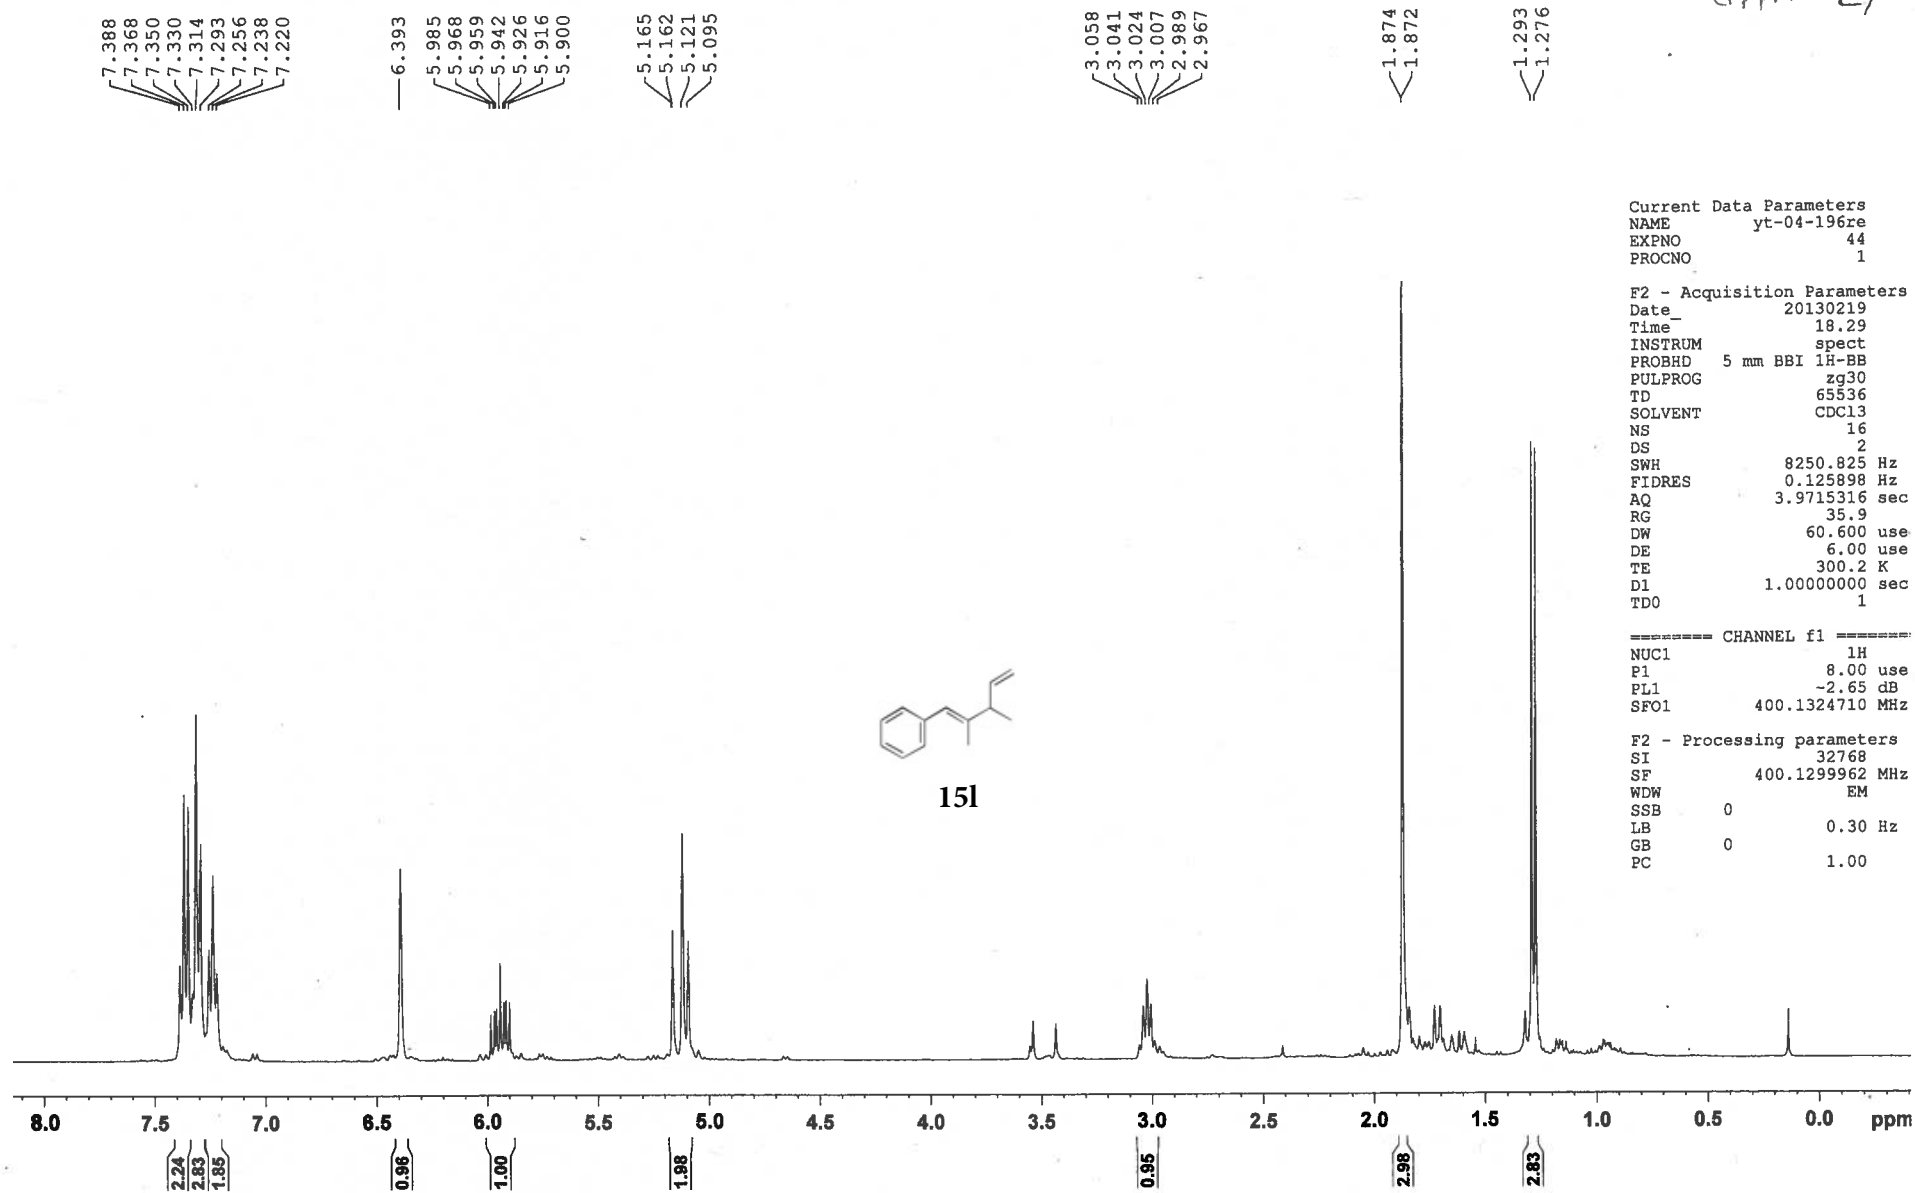

Current Data Parameters  
 NAME yt-04-196ze  
 EXPNO 44  
 PROCNO 1

F2 - Acquisition Parameters  
 Date 20130219  
 Time 18.29  
 INSTRUM spect  
 PROBHD 5 mm BBI 1H-BB  
 PULPROG zg30  
 TD 65536  
 SOLVENT CDC13  
 NS 16  
 DS 2  
 SWH 8250.825 Hz  
 FIDRES 0.125898 Hz  
 AQ 3.9715316 sec  
 RG 35.9  
 DW 60.600 use  
 DE 6.00 use  
 TE 300.2 K  
 D1 1.00000000 sec  
 TDO 1

===== CHANNEL f1 =====  
 NUC1 1H  
 P1 8.00 use  
 PL1 -2.65 dB  
 SFO1 400.1324710 MHz

F2 - Processing parameters  
 SI 32768  
 SF 400.1299962 MHz  
 WDW EM  
 SSB 0  
 LB 0.30 Hz  
 GB 0  
 PC 1.00

Proton NMR (400 MHz, D-chloroform) Spectra of compound **15l** (HV using Cl<sub>2</sub>Co(dppp)) (Entry 19, Table 3)

Proton NMR (500 MHz, D-chloroform) Spectra of compound **15I** (Alkene Region)

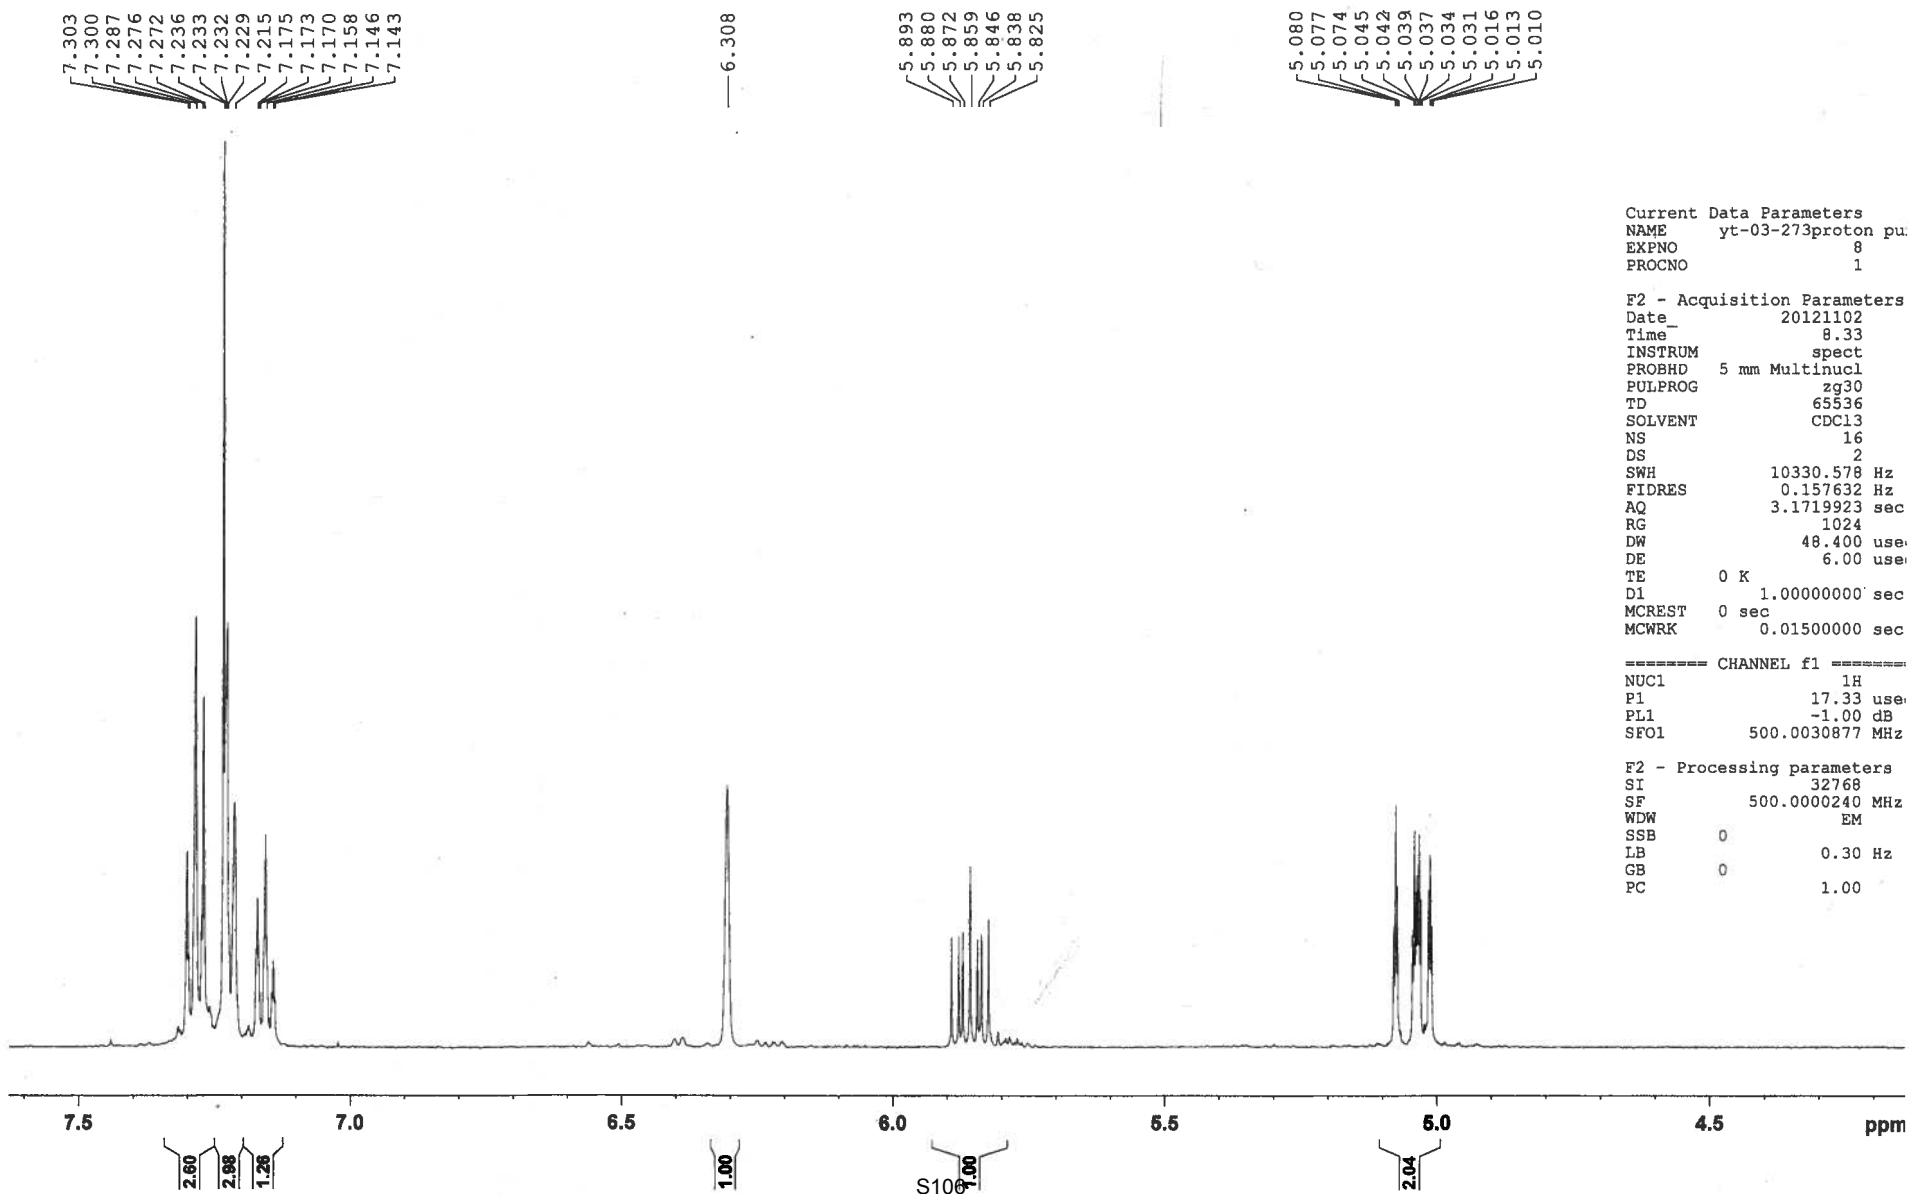

Current Data Parameters  
 NAME yt-03-273proton pu  
 EXPNO 8  
 PROCNO 1

F2 - Acquisition Parameters  
 Date\_ 20121102  
 Time\_ 8.33  
 INSTRUM spect  
 PROBHD 5 mm Multinucl  
 PULPROG zg30  
 TD 65536  
 SOLVENT CDCl3  
 NS 16  
 DS 2  
 SWH 10330.578 Hz  
 FIDRES 0.157632 Hz  
 AQ 3.1719923 sec  
 RG 1024  
 DW 48.400 usec  
 DE 6.00 usec  
 TE 0 K  
 D1 1.00000000 sec  
 MCREST 0 sec  
 MCWRK 0.01500000 sec

===== CHANNEL f1 =====  
 NUC1 1H  
 P1 17.33 usec  
 PL1 -1.00 dB  
 SF01 500.0030877 MHz

F2 - Processing parameters  
 SI 32768  
 SF 500.0000240 MHz  
 WDW EM  
 SSB 0  
 LB 0.30 Hz  
 GB 0  
 PC 1.00

Carbon NMR (125 MHz, D-Chloroform) of compound **15I** (Entry 19, Table 3)

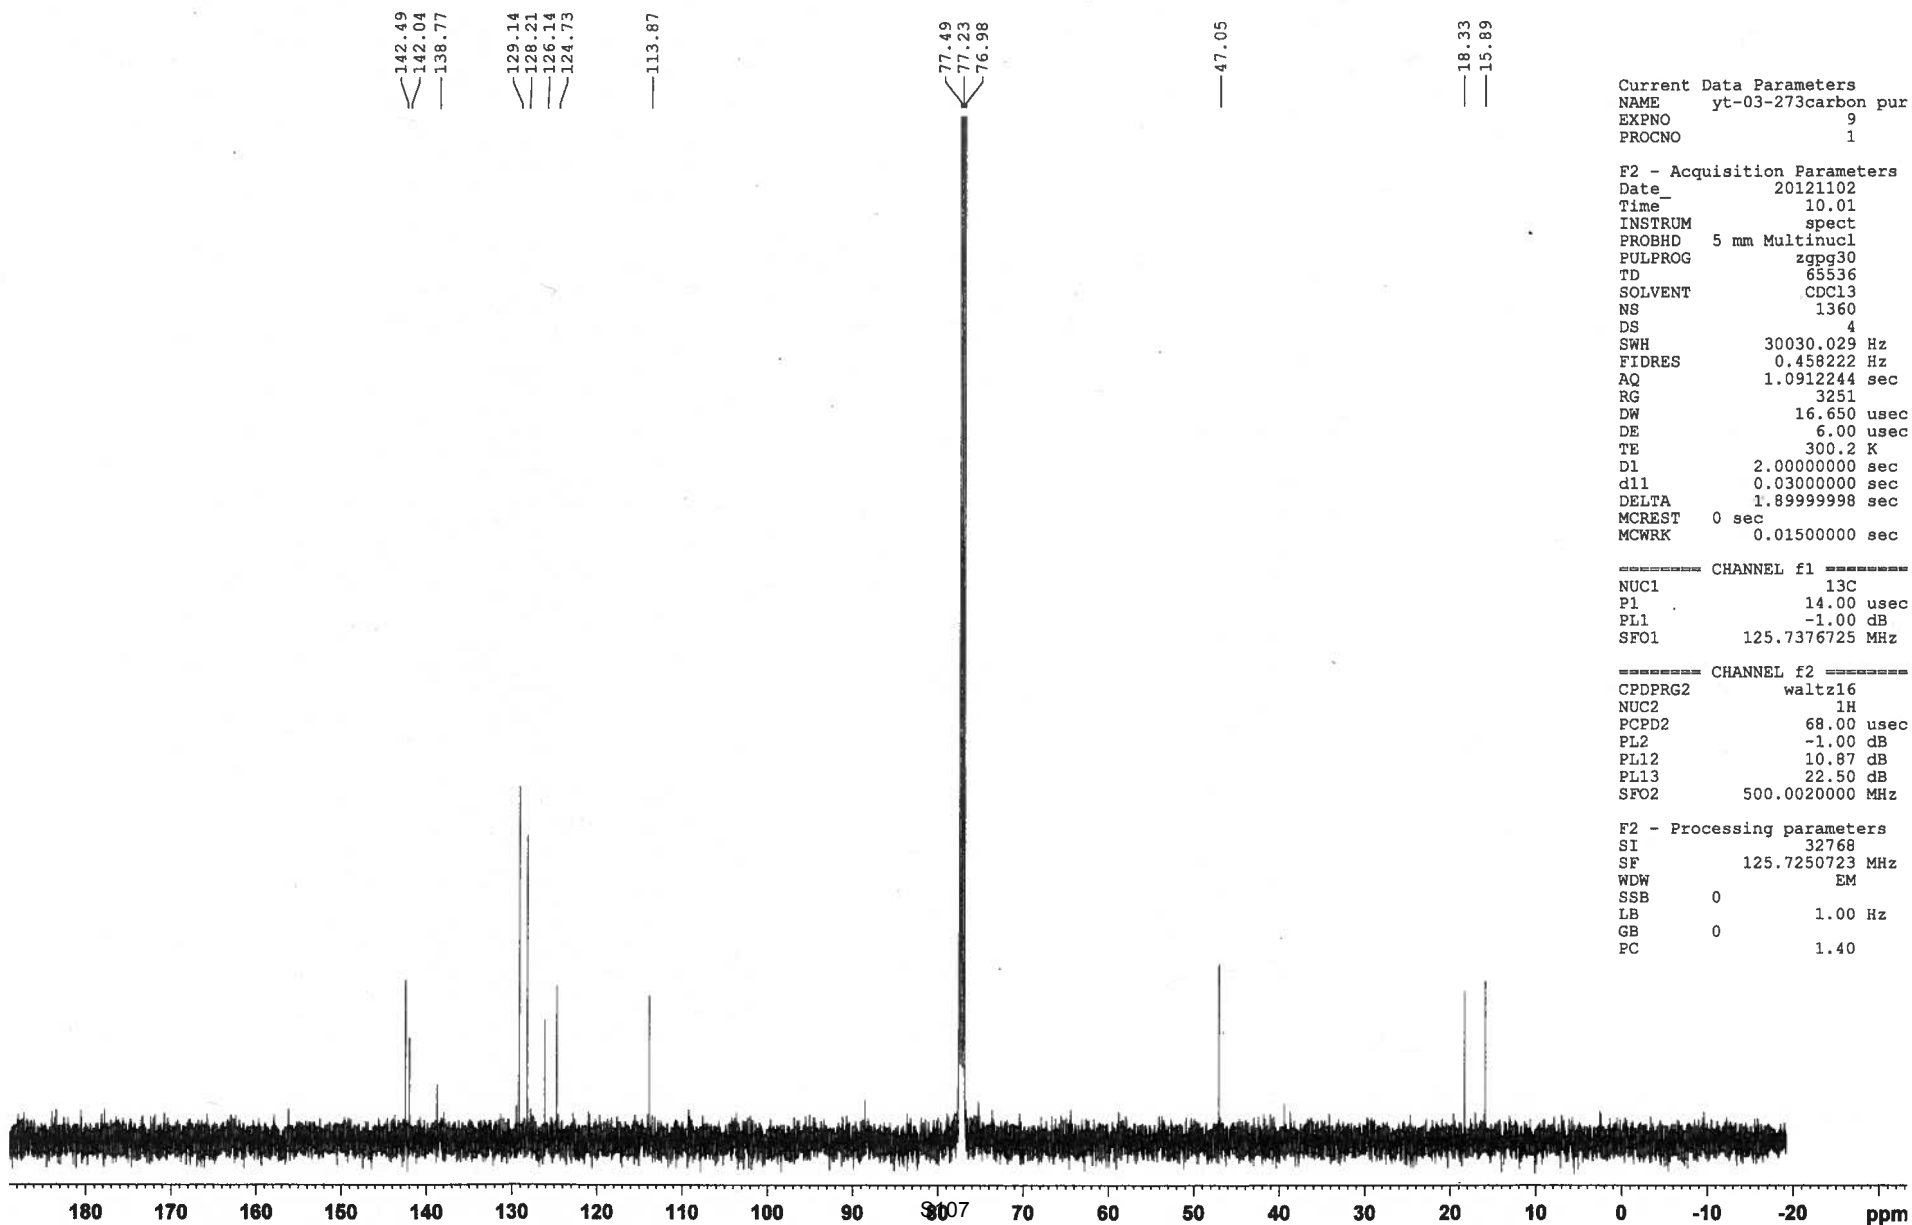

```

Current Data Parameters
NAME      yt-03-273carbon pur
EXPNO     9
PROCNO    1

F2 - Acquisition Parameters
Date_     20121102
Time_     10.01
INSTRUM   spect
PROBHD    5 mm Multinucl
PULPROG   zgpg30
TD         65536
SOLVENT   CDCl3
NS         1360
DS         4
SWH        30030.029 Hz
FIDRES     0.458222 Hz
AQ         1.0912244 sec
RG         3251
DW         16.650 usec
DE         6.00 usec
TE         300.2 K
D1         2.00000000 sec
d11        0.03000000 sec
DELTA     1.89999998 sec
MCREST    0 sec
MCWRK     0.01500000 sec

===== CHANNEL f1 =====
NUC1       13C
P1         14.00 usec
PL1        -1.00 dB
SFO1       125.7376725 MHz

===== CHANNEL f2 =====
CPDPRG2    waltz16
NUC2       1H
PCPD2      68.00 usec
PL2        -1.00 dB
PL12       10.87 dB
PL13       22.50 dB
SFO2       500.0020000 MHz

F2 - Processing parameters
SI         32768
SF         125.7250723 MHz
WDW        EM
SSB        0
LB         1.00 Hz
GB         0
PC         1.40
    
```

## Hydrovinylation of 7-methyl-3-methyleneocta-1,6-diene ( $\beta$ -myrcene, 12m)

### Hydrovinylation of ( $\beta$ -myrcene) using [dppp]CoCl<sub>2</sub> (Table 3, Entry 21). To an oven dried

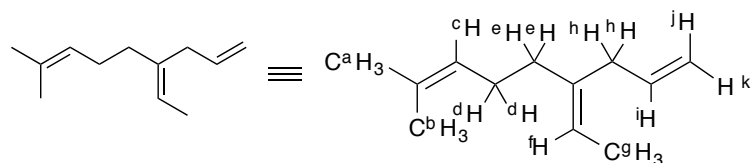

round bottom flask with a sidearm, was added [DPPP]CoCl<sub>2</sub> (49 mg, 0.090 mmol) dissolved in dichloromethane (1 mL) at room temperature. Trimethylaluminium as a 2M solution in toluene (0.14 mL,

0.27 mmol) was added dropwise and the color of the solution changed from deep blue to red brown with the formation of white fumes over the solution. After 2 to 3 minutes, the reaction vessel was carefully evacuated and then refilled with ethylene from a balloon. The reaction vessel was kept at room temperature and 7-methyl-3-methyleneocta-1,6-diene (0.15 mL, 0.90 mmol) added under ethylene and the mixture was stirred for 1 h. The ethylene balloon was removed and 0.1 mL of methanol was added to the flask. The reaction solution was diluted with pentane (2 mL) and subsequently passed through a silica plug. The plug was washed with pentane (3 x 5 mL). Removal of solvent yielded the product as colorless oil (123 mg, 83%). GC and NMR analysis showed that the product (**16m**) was essentially pure. <sup>1</sup>H NMR (CDCl<sub>3</sub>, 400MHz): 1.57 – 1.58 (m, 6 H), 1.66 (s, 3 H), 1.95 – 2.07 (m, 4 H), 2.77 (d, J = 6.4 Hz, 2 H), 4.94 - 5.04 (m, 2 H), 5.06 - 5.09 (m, 1 H), 5.28 (q, J = 7 Hz, 1 H), 5.68 - 5.78 (m, 1 H). NOESY: H<sub>g</sub> ---> H<sub>h</sub>, H<sub>i</sub>; H<sub>f</sub> ---> H<sub>e</sub>, H<sub>d</sub>; H<sub>e</sub> ---> H<sub>f</sub>, H<sub>c</sub>; H<sub>d</sub> ---> H<sub>f</sub>, H<sub>c</sub>. <sup>13</sup>C NMR (CDCl<sub>3</sub>, 125.02 MHz): 13.43, 17.90, 25.92, 26.99, 34.81, 37.29, 115.11, 119.85, 124.59, 131.60, 136.38, 137.76. Gas Chromatography: CSP GC (Cyclosil, OT 100 °C/ isothermal, H<sub>2</sub> carrier gas) starting material R<sub>t</sub> = 6.571 min. R<sub>T</sub> for product = 9.954 min. The following table shows the additional experiments conducted by using  $\beta$ -myrcene employing 10 mol % catalyst and trimethylaluminium as an activator. The isomeric product has not been identified.

| Entry | Catalyst                     | Temp(°C)/Time(h) | Conv.(%) | Product          |
|-------|------------------------------|------------------|----------|------------------|
| 1.    | [DPPM]CoCl <sub>2</sub>      | rt/4             | 71%      | (55%) isomer(3%) |
| 2.    | [DPPE]CoCl <sub>2</sub>      | -20/3            | 8%       | 8%               |
| 3.    | [DPPB]CoCl <sub>2</sub>      | -20/4            | 91%      | (82%)+ iso(9%)   |
| 4.    | (SS)-[DIOP]CoCl <sub>2</sub> | -20/7            | 91%      | (62%) +iso(15%)  |
| 5.    | (SS)-[BDPP]CoCl <sub>2</sub> | -20/7            | 94%      | (36%)+ iso(57%)  |

WVW

dppp/20°C/4hrs.

=====  
Acq. Operator : YAM  
Acq. Instrument : Babu Location : Vial 201  
Injection Date : 11/28/2012 3:59:20 PM  
Inj Volume : 1 µl  
Different Inj Volume from Sequence ! Actual Inj Volume : 3 µl  
Acq. Method : C:\CHEM32\1\METHODS\YT\_ISO120\_CYCLODEX-B.M  
Last changed : 11/28/2012 3:41:27 PM by YAM  
(modified after loading)  
Analysis Method : C:\CHEM32\1\METHODS\BAKE.M  
Last changed : 11/28/2012 4:43:57 PM by Kendra Dewese  
(modified after loading)

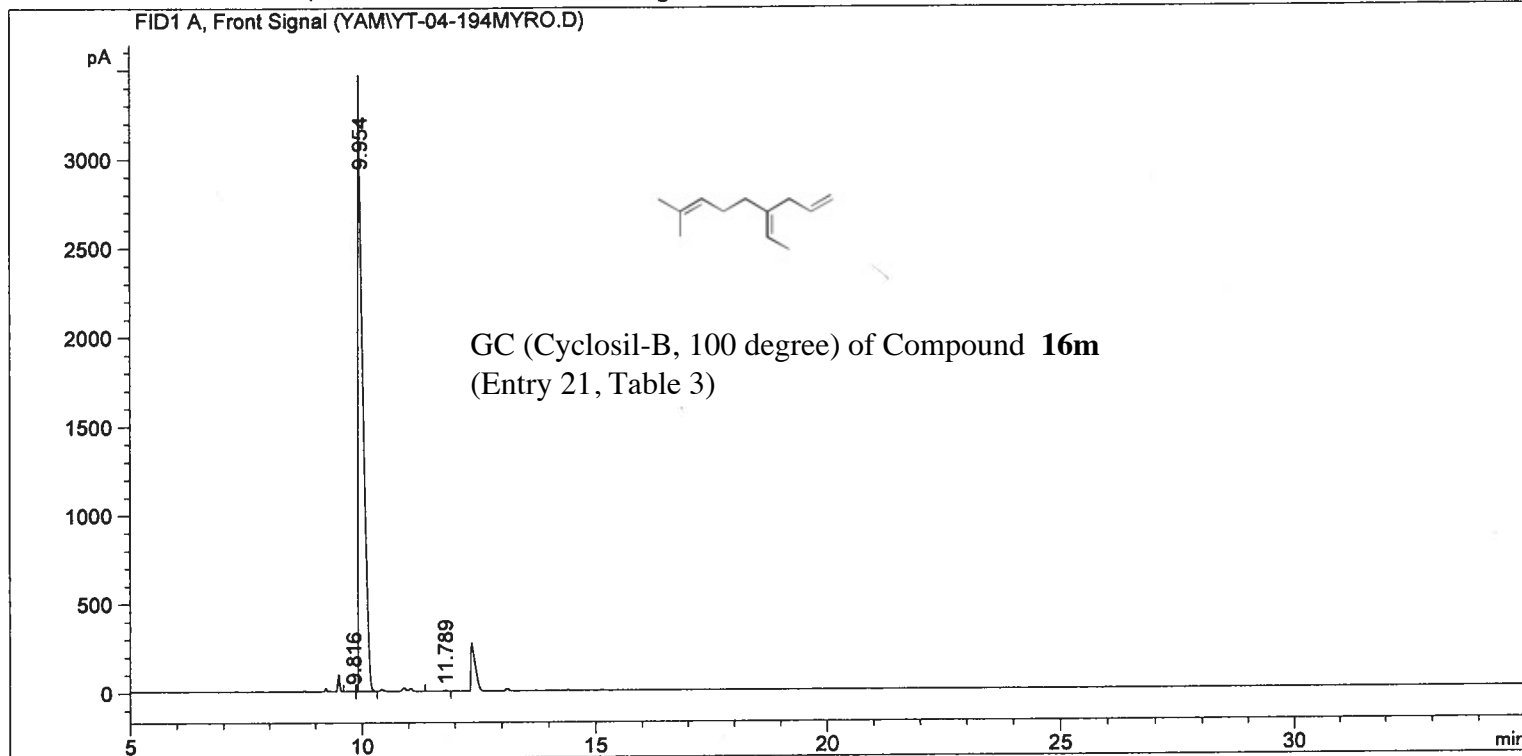

=====  
Area Percent Report  
=====

Sorted By : Signal  
Multiplier: : 1.0000  
Dilution: : 1.0000  
Use Multiplier & Dilution Factor with ISTDs

Signal 1: FID1 A, Front Signal

| Peak # | RetTime [min] | Type | Width [min] | Area [pA*s] | Height [pA] | Area %   |
|--------|---------------|------|-------------|-------------|-------------|----------|
| 1      | 9.816         | VV   | 0.0948      | 37.49633    | 5.54818     | 0.15672  |
| 2      | 9.954         | VV   | 0.1119      | 2.38449e4   | 2900.67920  | 99.66528 |
| 3      | 11.789        | BV   | 0.1006      | 42.58645    | 6.35175     | 0.17800  |

Totals : 2.39250e4 2912.57913

Proton NMR (400 MHz, D-chloroform) spectra of compound **16m**  
(Entry 21, Table 3)

*dpppccl<sub>2</sub>/TMA/β-mhl con*

Current Data Parameters  
NAME yt-04-193at rt6,7pro  
EXPNO 73  
PROCNO 1

F2 - Acquisition Parameters  
Date\_ 20121227  
Time 16.08  
INSTRUM spect  
PROBHD 5 mm BBI 1H-BB  
PULPROG zg30  
TD 65536  
SOLVENT CDCl3  
NS 16  
DS 2  
SWH 8250.825 Hz  
FIDRES 0.125898 Hz  
AQ 3.9715316 sec  
RG 101.6  
DW 60.600 usec  
DE 6.00 usec  
TE 300.2 K  
D1 1.00000000 sec  
TDO 1

===== CHANNEL f1 =====  
NUC1 1H  
P1 8.00 usec  
PL1 -2.65 dB  
SFO1 400.1324710 MHz

F2 - Processing parameters  
SI 32768  
SF 400.1300175 MHz  
WDW EM  
SSB 0  
LB 0.30 Hz  
GB 0  
PC 1.00

5.779  
5.763  
5.755  
5.747  
5.737  
5.721  
5.712  
5.704  
5.696  
5.679  
5.308  
5.291  
5.274  
5.258  
5.095  
5.082  
5.079  
5.068  
5.065  
5.061  
5.038  
5.033  
5.029  
5.025  
4.995  
4.991  
4.986  
4.982  
4.977  
4.973  
4.972  
4.968  
4.952  
4.948  
4.943

2.779  
2.763  
2.070  
2.053  
2.031  
2.015  
1.985  
1.975  
1.972  
1.968  
1.965  
1.963  
1.951  
1.948  
1.946  
1.661  
1.579  
1.569

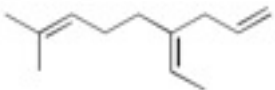

**16m**

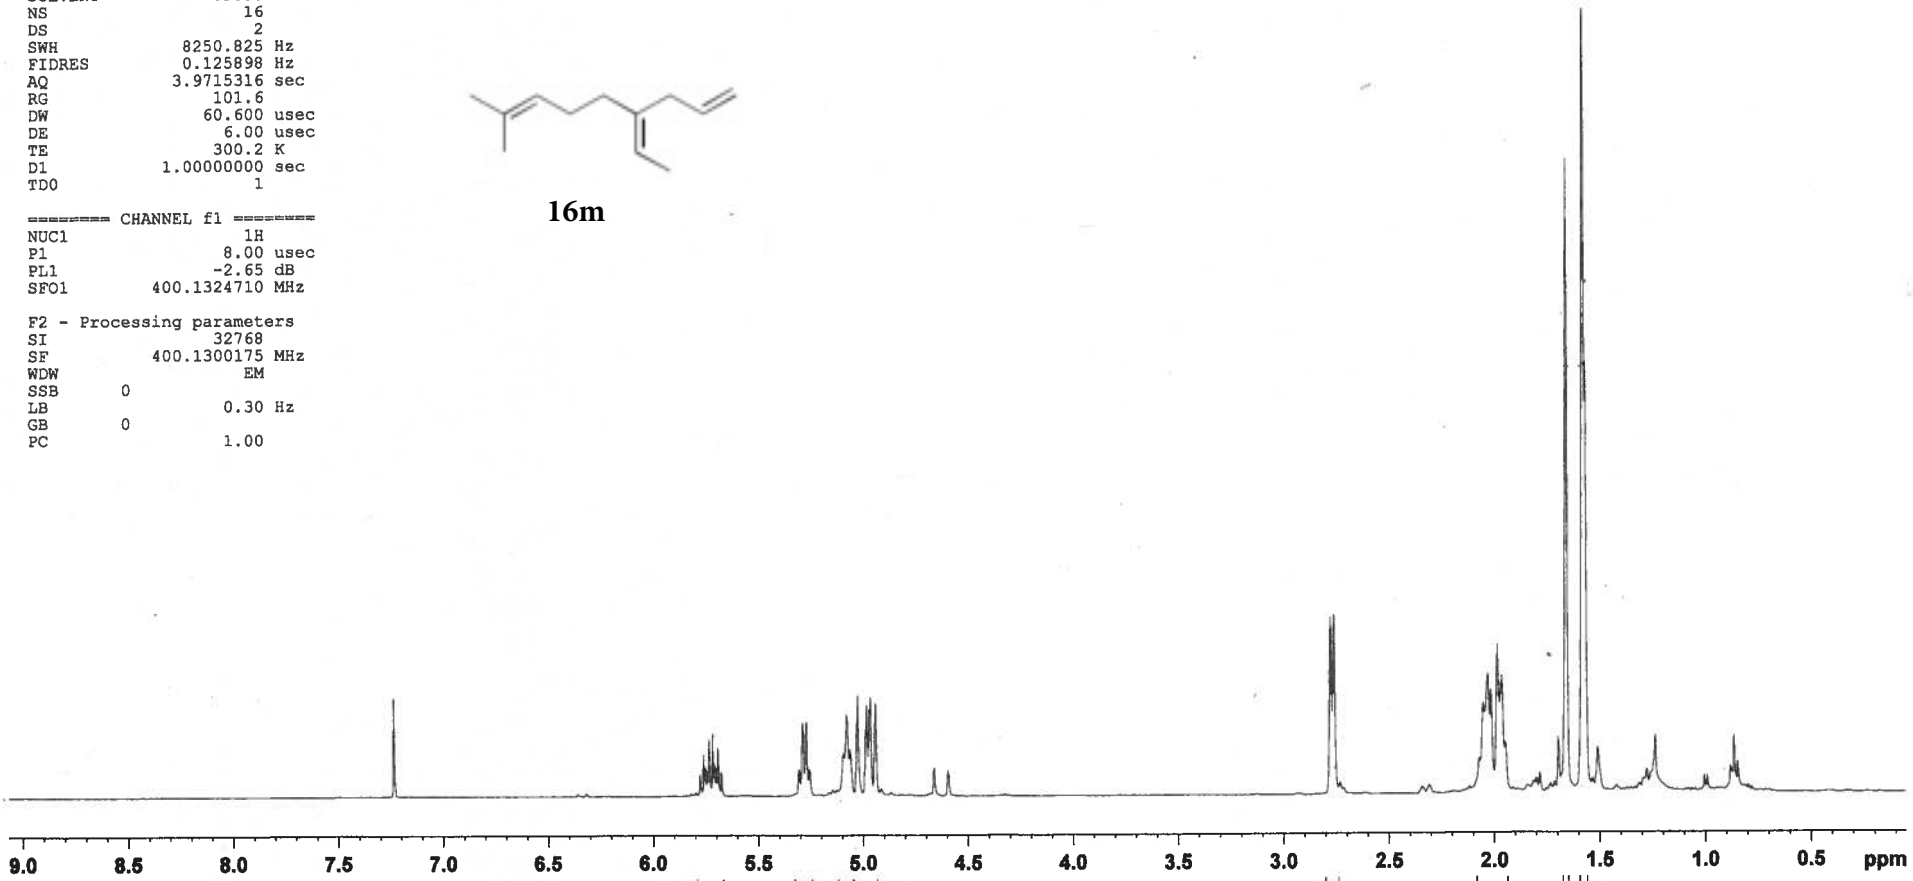

Proton NMR (400 MHz, D-chloroform) spectra of compound **16m** (Expansion)

Current Data Parameters  
 NAME yt-04-193at rt6,7pro  
 EXPNO 73  
 PROCNO 1

F2 - Acquisition Parameters  
 Date\_ 20121227  
 Time\_ 16.08  
 INSTRUM spect  
 PROBHD 5 mm BBI 1H-BB  
 PULPROG zg30  
 TD 65536  
 SOLVENT CDCl3  
 NS 16  
 DS 2  
 SWH 8250.825 Hz  
 FIDRES 0.125898 Hz  
 AQ 3.9715316 sec  
 RG 101.6  
 DW 60.600 usec  
 DE 6.00 usec  
 TE 300.2 K  
 D1 1.00000000 sec  
 TDO 1

===== CHANNEL f1 =====  
 NUC1 1H  
 P1 8.00 usec  
 PL1 -2.65 dB  
 SFO1 400.1324710 MHz

F2 - Processing parameters  
 SI 32768  
 SF 400.1300175 MHz  
 WDW EM  
 SSB 0  
 LB 0.30 Hz  
 GB 0  
 PC 1.00

5.779  
5.763  
5.755  
5.747  
5.737  
5.721  
5.712  
5.704  
5.696  
5.679

5.308  
5.291  
5.274  
5.258

5.095  
5.082  
5.079  
5.068  
5.065  
5.061  
5.038  
5.033  
5.029  
5.025  
4.995  
4.991  
4.986  
4.982  
4.977  
4.973  
4.972  
4.968  
4.952  
4.948  
4.943

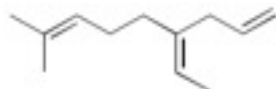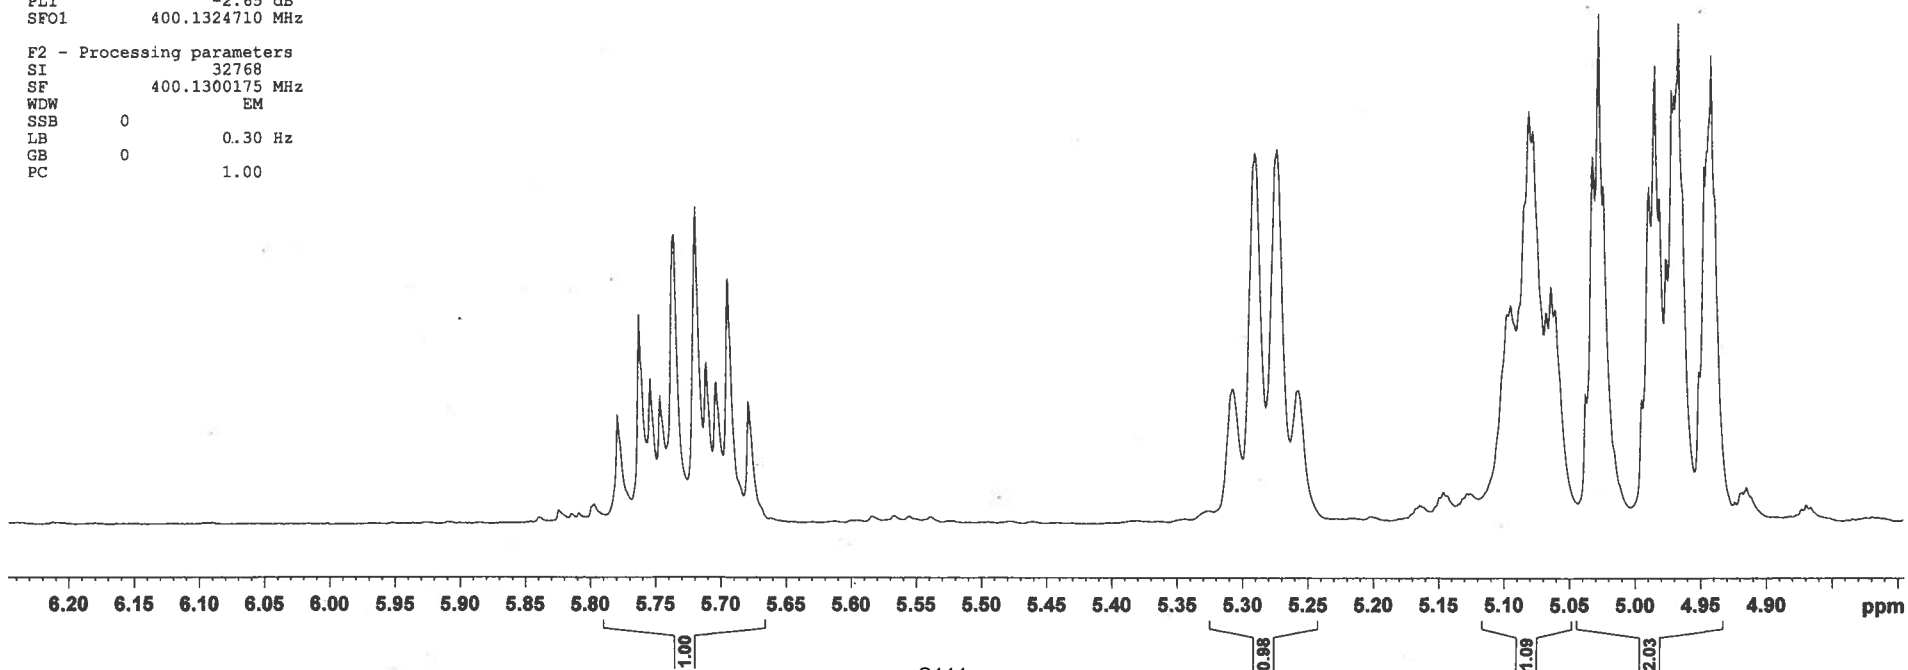

Carbon NMR (125 MHz, D-chloroform) spectra of compound **16m**

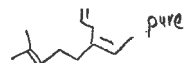

Current Data Parameters  
 NAME yt-04-193rt1car  
 EXPNO 14  
 PROCNO 1

F2 - Acquisition Parameters  
 Date 20121227  
 Time 12.56  
 INSTRUM spect  
 PROBHD 5 mm Multinucl  
 PULPROG zgpg30  
 TD 65536  
 SOLVENT CDCl3  
 NS 871  
 DS 4  
 SWH 30030.029 Hz  
 FIDRES 0.458222 Hz  
 AQ 1.0912244 sec  
 RG 3649.1  
 DW 16.650 usec  
 DE 6.00 usec  
 TE 295.2 K  
 D1 2.00000000 sec  
 d11 0.03000000 sec  
 DELTA 1.89999998 sec  
 MCREST 0 sec  
 MCWRK 0.01500000 sec

===== CHANNEL f1 =====  
 NUC1 13C  
 P1 14.00 usec  
 PL1 -1.00 dB  
 SFO1 125.7376725 MHz

===== CHANNEL f2 =====  
 CPDPRG2 waltz16  
 NUC2 1H  
 PCPD2 68.00 usec  
 PL2 -1.00 dB  
 PL12 10.87 dB  
 PL13 22.50 dB  
 SFO2 500.0020000 MHz

F2 - Processing parameters  
 SI 32768  
 SF 125.7250747 MHz  
 WDW EM  
 SSB 0  
 LB 1.00 Hz  
 GB 0  
 PC 1.40

137.76  
 136.38  
 131.60  
 124.59  
 119.85  
 115.11

37.29  
 34.81  
 26.98  
 25.92  
 17.90  
 13.44

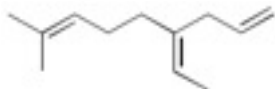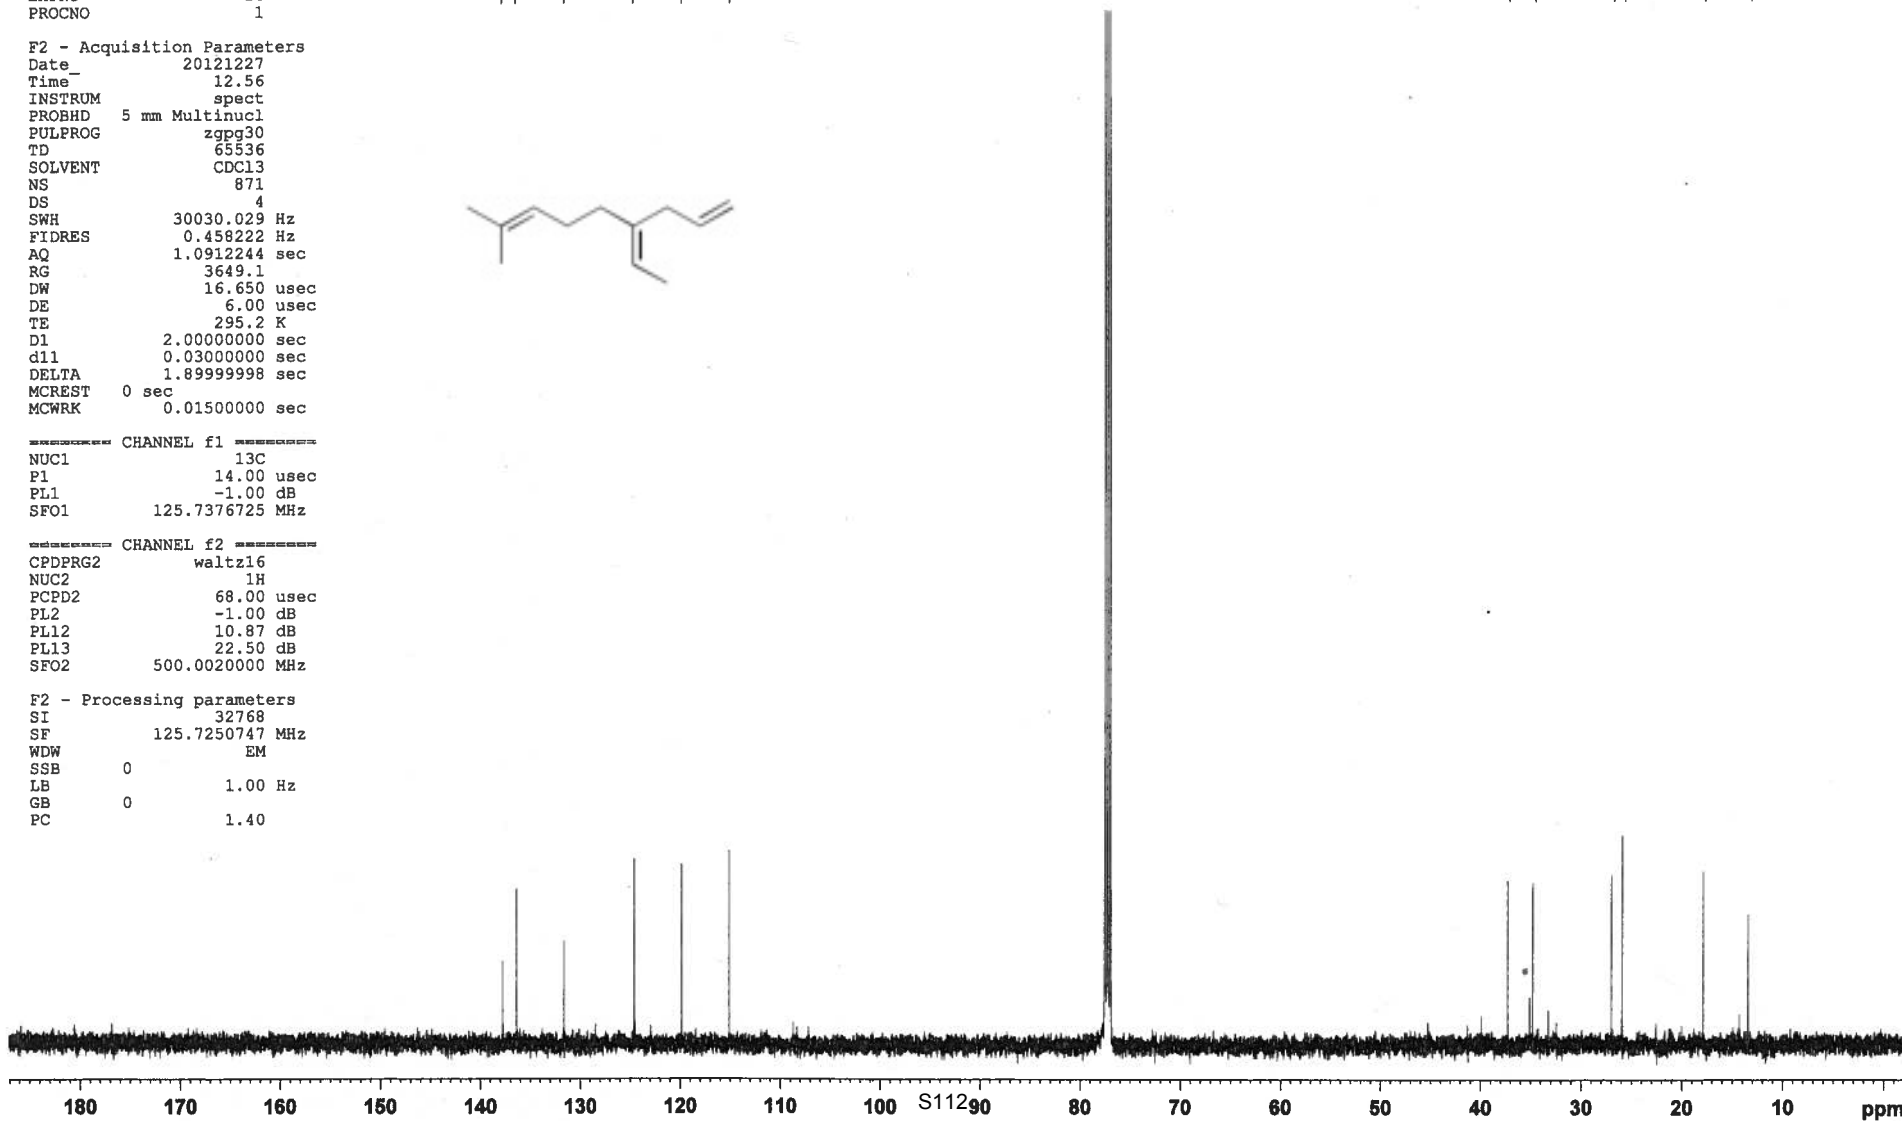



NOESY (500 MHz, D-chloroform) 2D spectra of compound **16m**

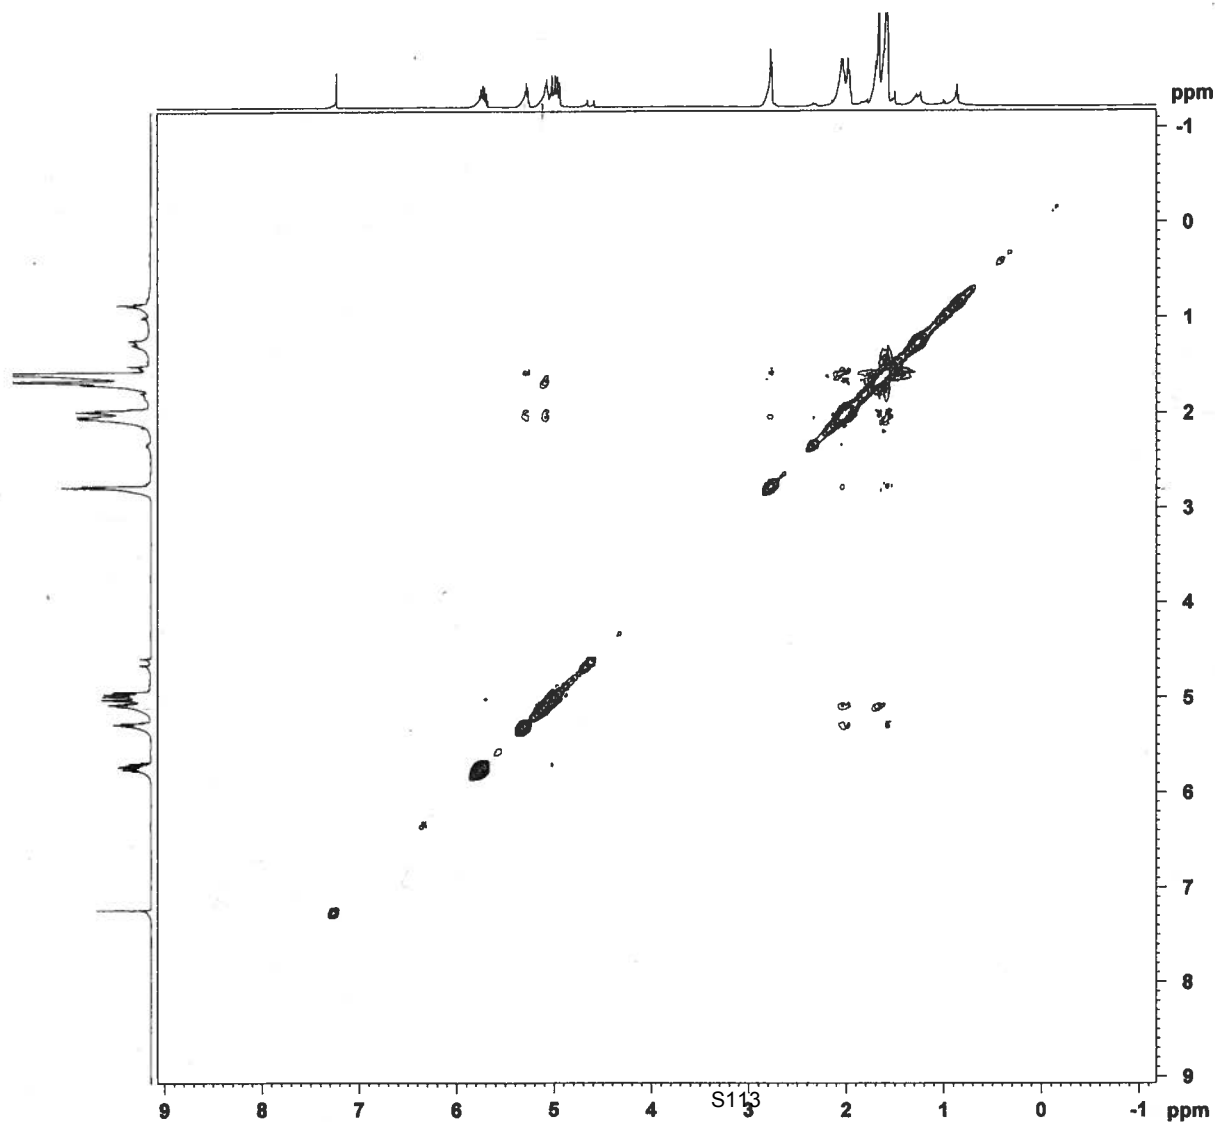

```

Current Data Parameters
NAME      yt-04-193,67noe
EXPNO     2
PROCNO    1

F2 - Acquisition Parameters
Date_     20130109
Time      14.46
INSTRUM   spect
PROBHD    5 mm Multinucl
PULPROG   noesygpph
TD         2048
SOLVENT   CDCl3
NS         4
DS         16
SWH        5122.951 Hz
FIDRES     2.501441 Hz
AQ         0.1999348 sec
RG         256
DW         97.600 usec
DE         6.00 usec
TE         300.2 K
d0         0.00007553 sec
D1         2.00000000 sec
D8         2.00000000 sec
D16        0.00020000 sec
IN0        0.00019520 sec
MCREST     0 sec
MCWRK     2.00000000 sec
TAU        0.99879998 sec

----- CHANNEL f1 -----
NUC1       1H
P1         17.33 usec
P2         34.66 usec
PL1        -1.00 dB
SFO1       500.0020000 MHz

----- GRADIENT CHANNEL -----
GPNAM1     SINE.100
GPNAM2     SINE.100
GPX1       0 %
GPX2       0 %
GPY1       0 %
GPY2       0 %
GPZ1       40.00 %
GPZ2       -40.00 %
P16        1000.00 usec

F1 - Acquisition parameters
TD         248
SFO1       500.002 MHz
FIDRES     20.657061 Hz
SW         10.246 ppm
FnMODE     TPPI

F2 - Processing parameters
SI         1024
SF         500.000259 MHz
WDW        QSINE
SSB        2
LB         0 Hz
GB         0
PC         1.00

F1 - Processing parameters
SI         1024
MC2        TPPI
SF         500.000259 MHz
WDW        TR
SSB        2
LB         0 Hz
GB         0
    
```

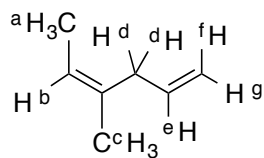

**Hydrovinylation of Isoprene using [dppp]CoCl<sub>2</sub> (Table 3, Entry 22):**

To an oven dried round bottom flask with a sidearm, was added [dppp]CoCl<sub>2</sub> (50 mg, 0.092 mmol) dissolved in dichloromethane (1 mL) at room temperature. Trimethylaluminium as a 2M solution in toluene (0.14 mL, 0.28 mmol) was added dropwise and the color of the solution changed from deep blue to red brown with the formation of white fumes over the solution. After 2 to 3 minutes, the reaction vessel was carefully evacuated and then refilled with ethylene balloon. The reaction vessel was cooled to -20 °C and isoprene (63 mg, 0.92 mmol) added under ethylene and the mixture was stirred for 4 h. The ethylene balloon was removed and 0.1 mL methanol was added into the flask. The reaction solution was diluted with pentane (2 mL) and warmed to room temperature and subsequently passed through a silica plug very quickly. The plug was washed with pentane (3 x 5 mL). Removal of solvent was difficult due to high volatility of the product so GC and NMR analysis showed that the product was essentially pure (**16n**).

<sup>1</sup>H NMR (CDCl<sub>3</sub>, 400 MHz): 1.64 (d, J = 6.8 Hz, 3 H, H<sup>a</sup>), 1.73 (m, 3 H, H<sup>c</sup>), 2.83 (d, J = 6.4 Hz, 2 H, H<sup>d</sup> ??), 5.02 (dm, J = 10 Hz, 1 H, H<sup>g</sup>), 5.08 (dm, J = 17 Hz, 1 H, H<sup>f</sup>), 5.35 (qm, J = 6.8 Hz, 1 H, H<sup>b</sup>), 5.79 (ddt, J = 6, 10, 17 Hz, 1 H, H<sup>e</sup>). <sup>13</sup>C NMR (CDCl<sub>3</sub>, 125.02 MHz): 13.31, 23.50, 36.47, 115.09, 120.20, 134.04, 136.16.

Gas Chromatography: Methylsilicone SP GC (OT 35 °C/ isothermal, He carrier gas) R<sub>T</sub> for product = 5.14 min. CSP GC (Cyclosil, OT 50 °C/ isothermal, H<sub>2</sub> carrier gas). R<sub>T</sub> for product = 16.89 min.

Sample Name: YT-04-202A

```

=====
Acq. Operator   : YAM
Acq. Instrument : Babu
Injection Date  : 11/28/2012 10:33:22 AM
Location       : Vial 201
Inj Volume     : 1 µl
Actual Inj Volume : 3 µl
Different Inj Volume from Sequence !
Acq. Method    : C:\CHEM32\1\METHODS\YT_ISO120_CYCLODEX-B.M
Last changed   : 11/28/2012 10:31:30 AM by YAM
                (modified after loading)
Analysis Method : C:\CHEM32\1\METHODS\YT_ISO120_CYCLODEX-B.M
Last changed   : 11/28/2012 11:27:32 AM by YAM
                (modified after loading)
    
```

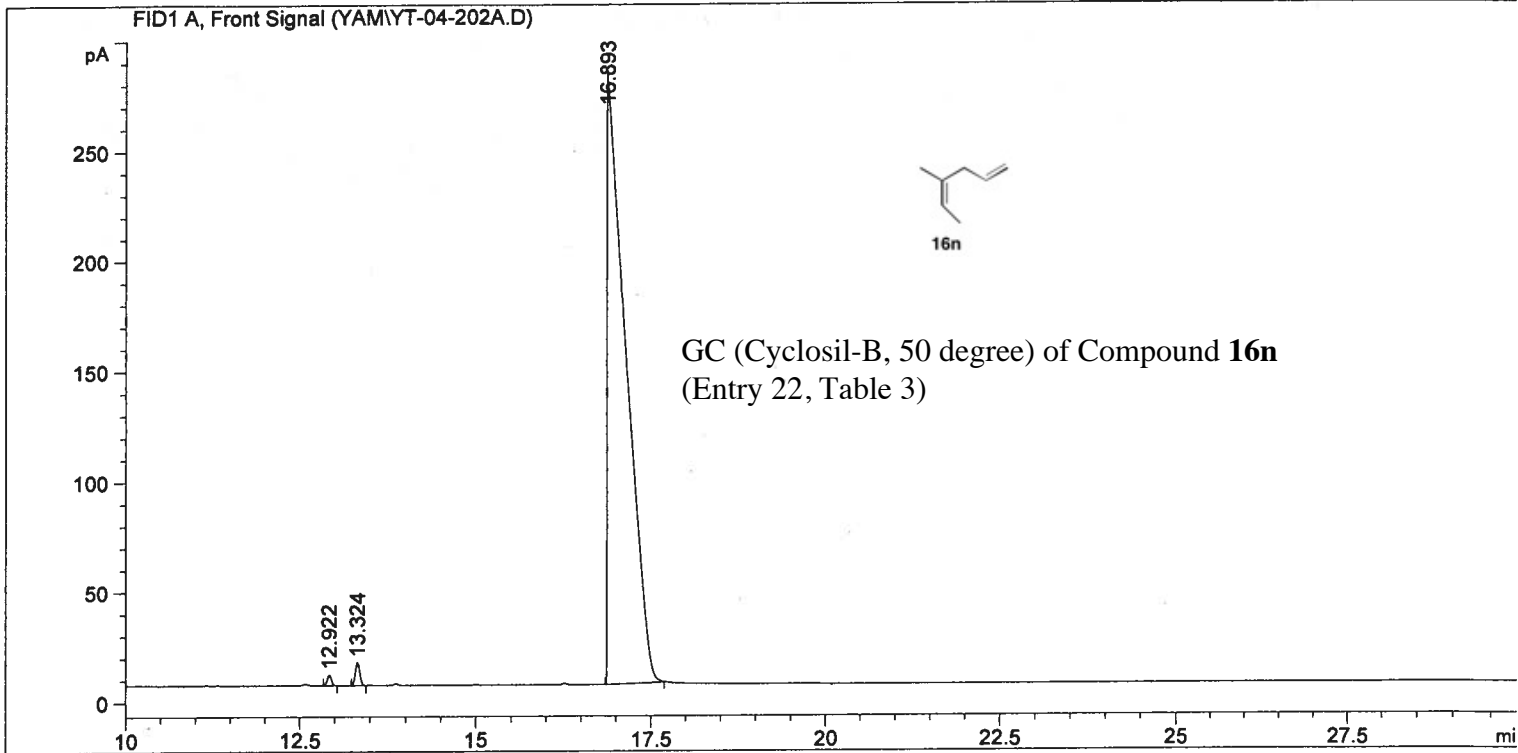

=====  
 Area Percent Report  
 =====

```

Sorted By      :      Signal
Multiplier:    :      1.0000
Dilution:      :      1.0000
Use Multiplier & Dilution Factor with ISTDs
    
```

Signal 1: FID1 A, Front Signal

| Peak # | RetTime [min] | Type | Width [min] | Area [pA*s] | Height [pA] | Area %   |
|--------|---------------|------|-------------|-------------|-------------|----------|
| 1      | 12.922        | BB   | 0.0647      | 20.02247    | 4.79711     | 0.38776  |
| 2      | 13.324        | BB   | 0.0674      | 44.62691    | 10.29189    | 0.86425  |
| 3      | 16.893        | BB   | 0.2242      | 5099.00146  | 277.23431   | 98.74799 |

Totals : 5163.65084 292.32332

Proton NMR (400 MHz, D-chloroform) spectra of compound 16n HV of isoprene using Cl<sub>2</sub>Co(dppp) {Entry 22, Table 3}

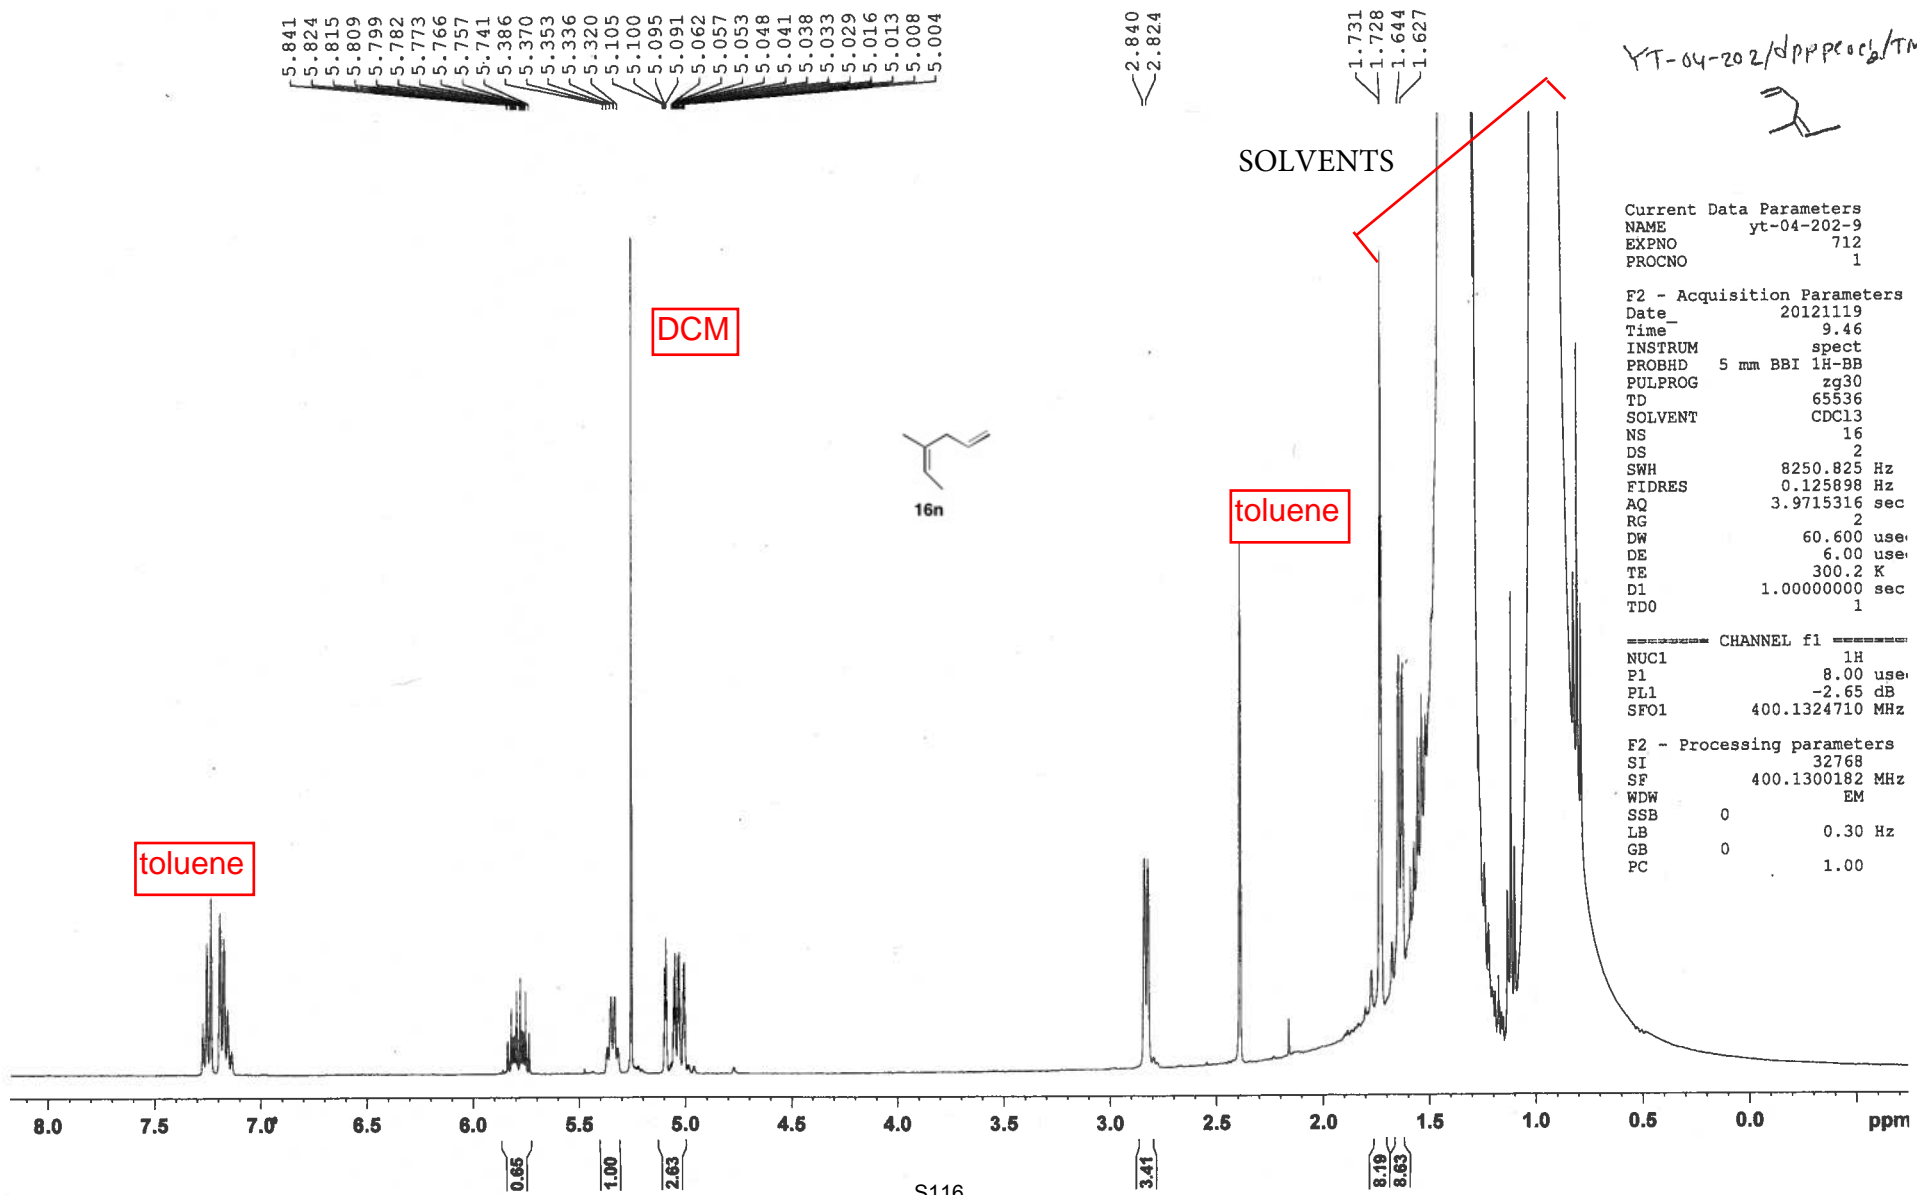

Proton NMR (400 MHz, D-Chloroform) Spectra of Compound 16n (Expansion of Alkene Region)

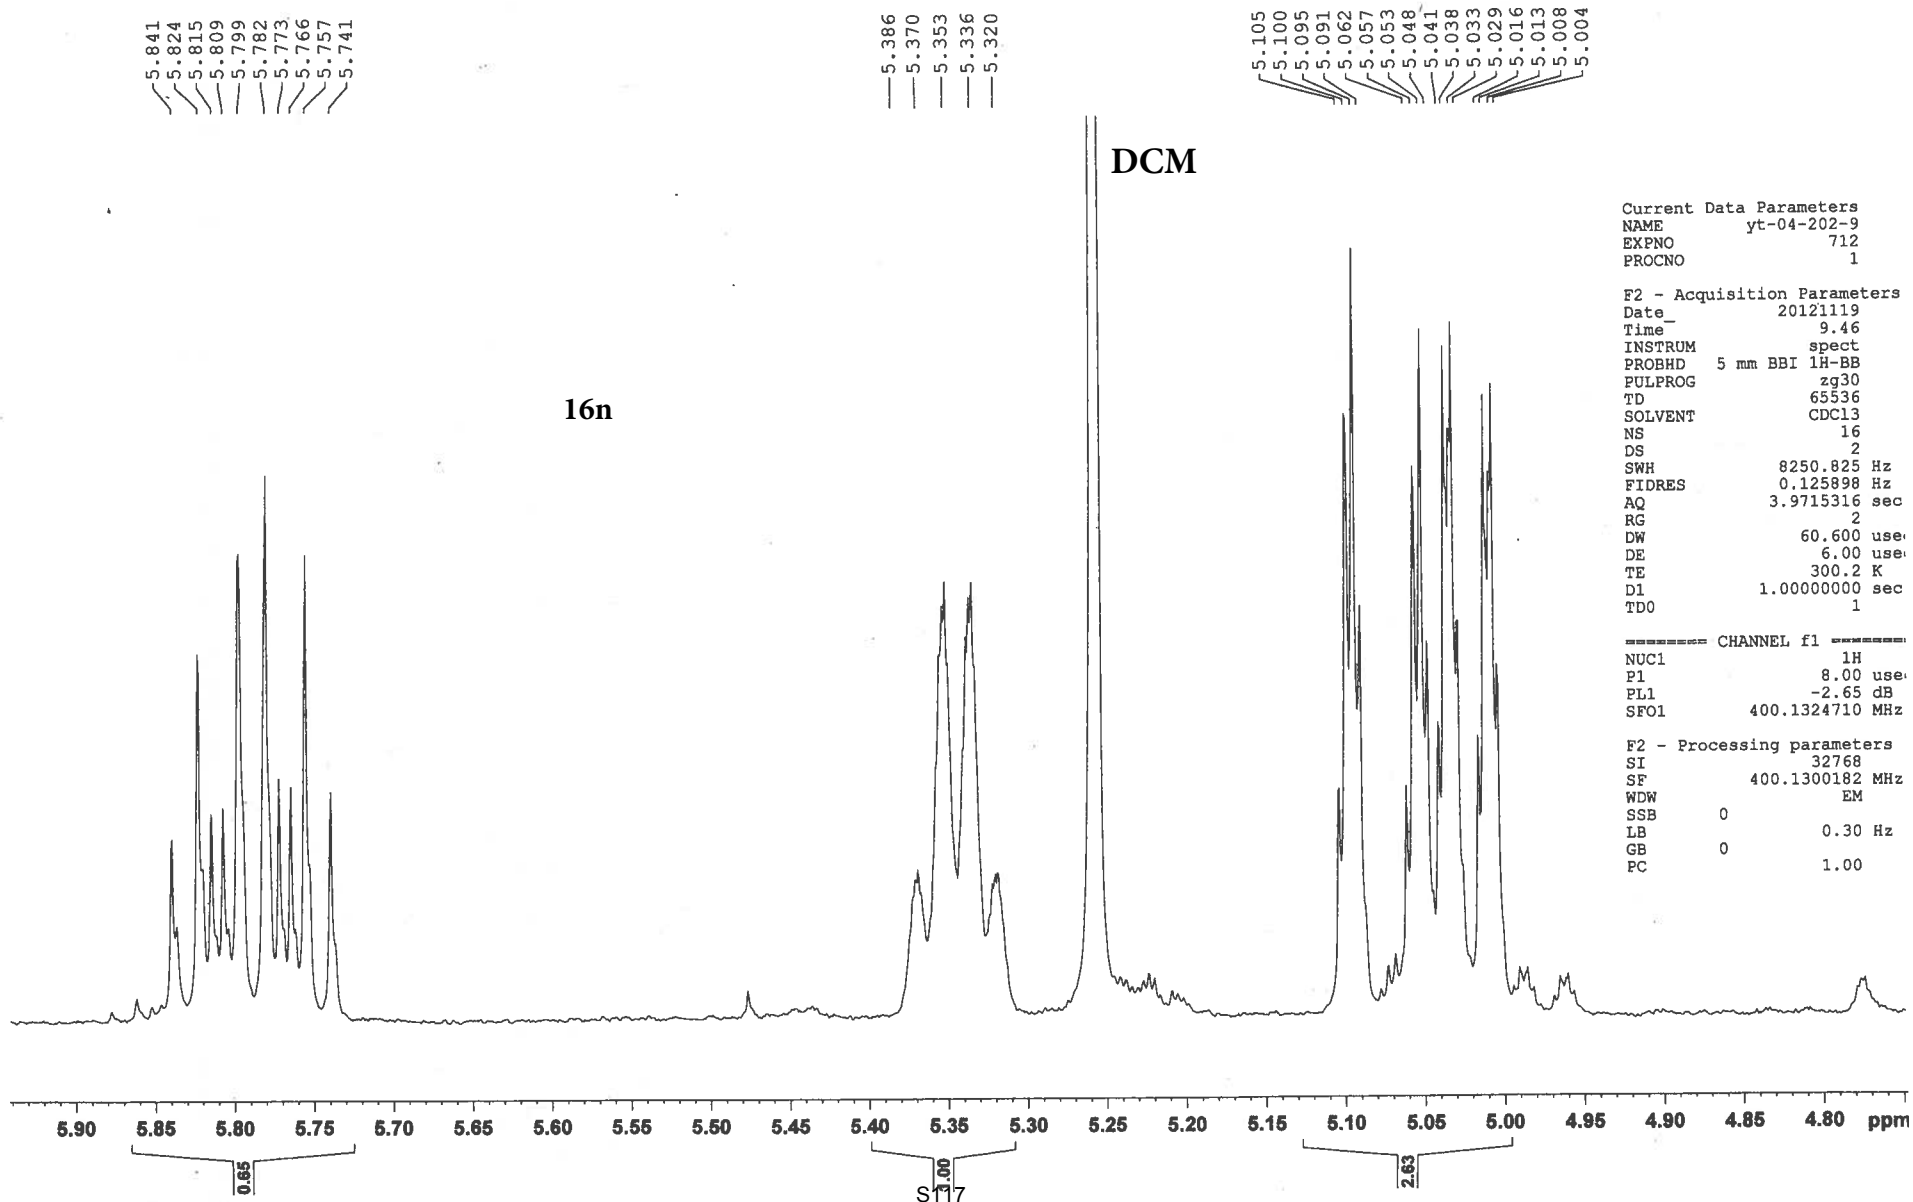

Current Data Parameters  
 NAME yt-04-202-9  
 EXPNO 712  
 PROCNO 1

F2 - Acquisition Parameters  
 Date\_ 20121119  
 Time 9.46  
 INSTRUM spect  
 PROBHD 5 mm BBI 1H-BB  
 PULPROG zg30  
 TD 65536  
 SOLVENT CDCl3  
 NS 16  
 DS 2  
 SWH 8250.825 Hz  
 FIDRES 0.125898 Hz  
 AQ 3.9715316 sec  
 RG 2  
 DW 60.600 usec  
 DE 6.00 usec  
 TE 300.2 K  
 D1 1.00000000 sec  
 TDO 1

===== CHANNEL f1 =====  
 NUC1 1H  
 P1 8.00 usec  
 PL1 -2.65 dB  
 SFO1 400.1324710 MHz

F2 - Processing parameters  
 SI 32768  
 SF 400.1300182 MHz  
 WDW EM  
 SSB 0  
 LB 0.30 Hz  
 GB 0  
 PC 1.00

Carbon NMR (125 MHz, D-chloroform) spectra of **16n** Cl<sub>2</sub>Co(DPPP) complex with solvent toluene and pentane

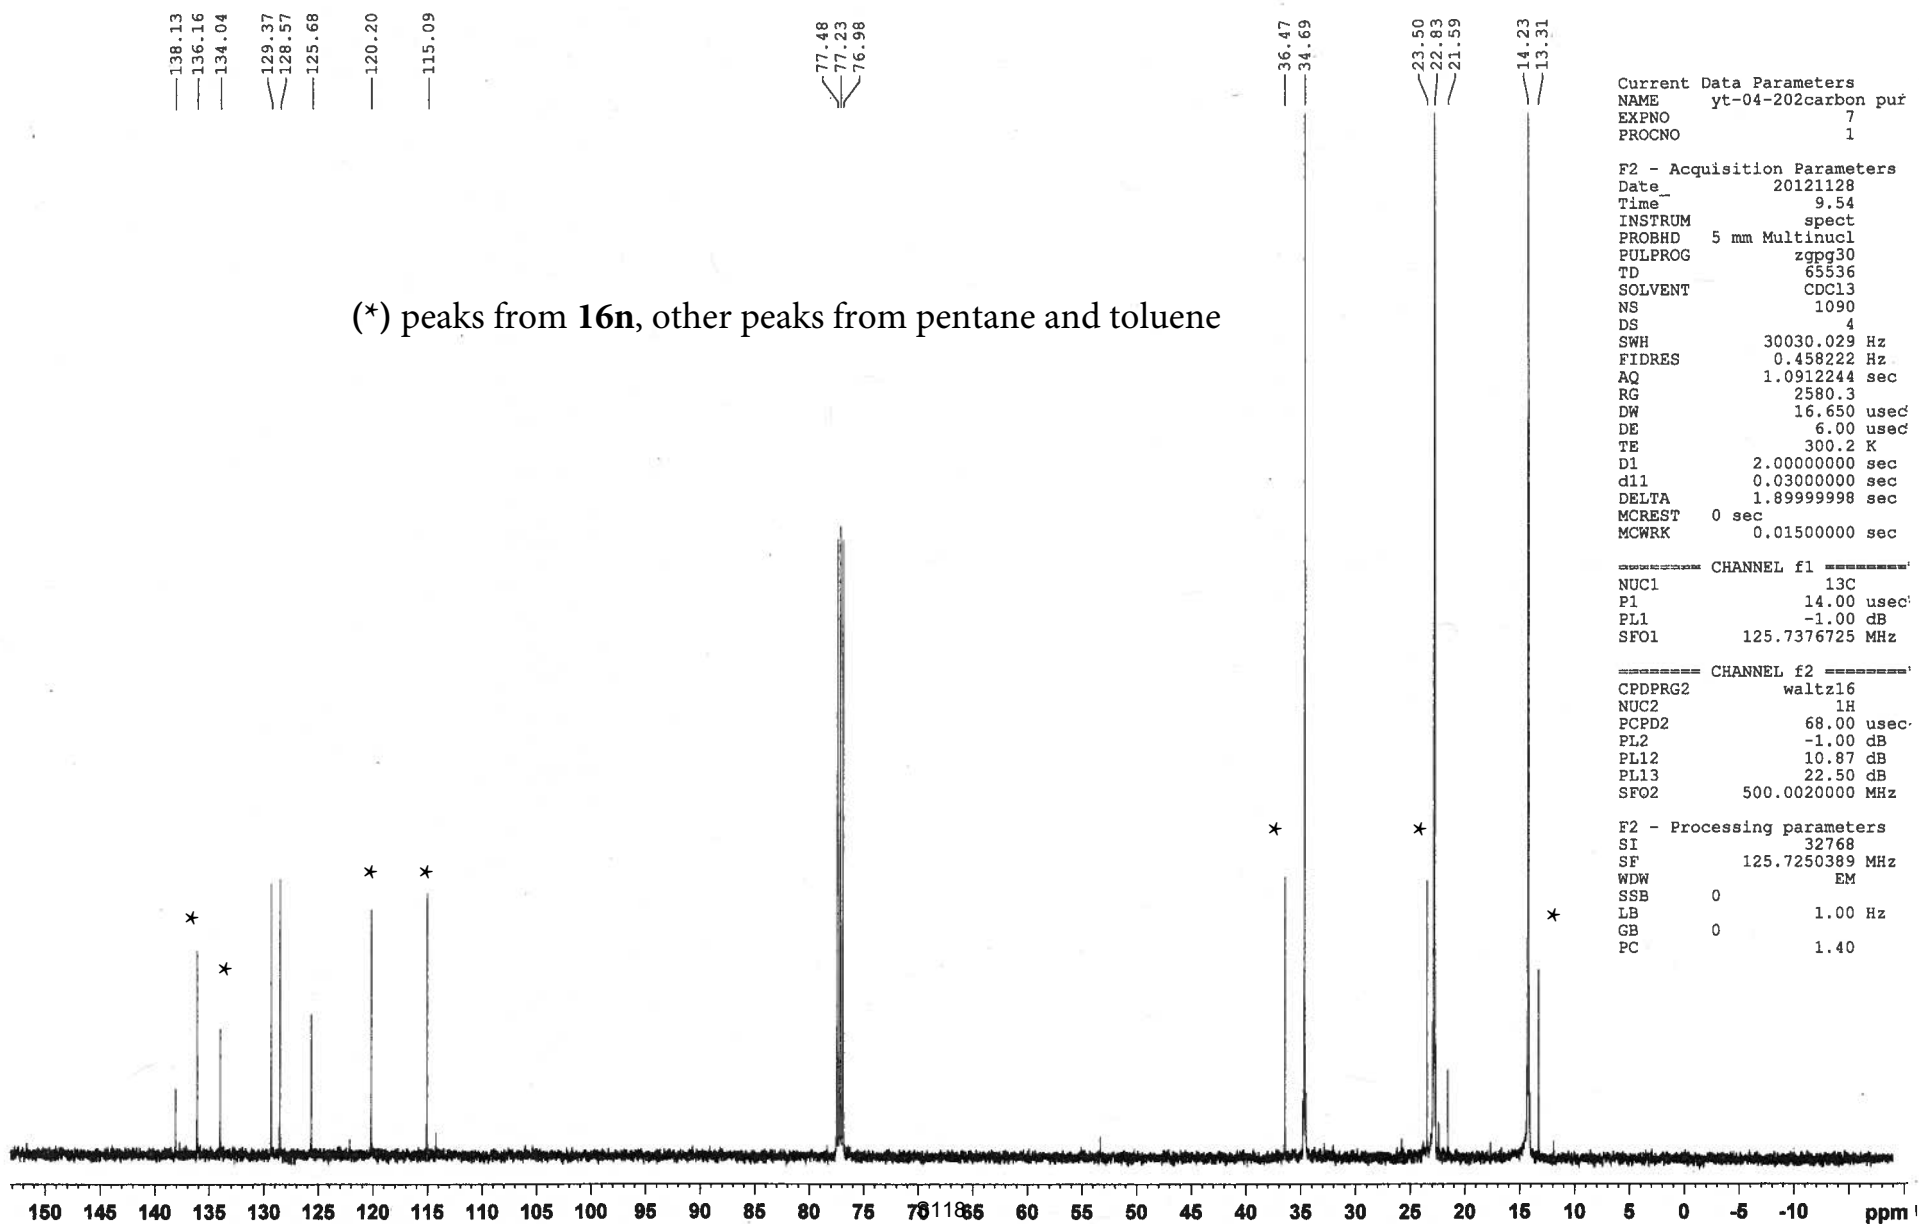

## References

1. Grutters, M. M. P.; Mueller, C.; Vogt, D. *J. Am. Chem. Soc.* 2006, **128**, 7414.
2. Sharma, R. K.; RajanBabu, T. V., *J. Am. Chem. Soc.* 2010, **132**, 3295.
3. (a) Reddy, S. S.; Radhakrishnan, K.; Sivaram, S. *Polymer Bulletin* 1996, **36**, 165-171. (b) Sangokya, S. A. Preparation of Methylaluminumoxanes. U.S. Patent 5,248,801, Sep 28, 1993.
4. **13f**: Ehlers, J.; König, W. A.; Lutz, S.; Wenz, G.; tom Dieck, H. *Angew. Chem. Int. Ed. Engl.* 1988, **27**, 1556.
5. Blumberg, L. C.; Costa, B.; Goldstein, R. *Tetrahedron Lett.* 2011, **52**, 872.
6. House, H. O.; Rasmusson, G. H. *J. Org.Chem.* 1961, **26**, 4278.
7. Piers, E.; Jung, G. L.; Ruediger, E. H. *Can. J. Chem.* 1987, **65**, 670.
8. Hoye, T. R.; Magee, A. S.; Trumper, W. S. *Synthetic Communications* 1982, **12**, 183.
9. Martin, S. F.; Tu, C.; Chou, T. *J. Am. Chem. Soc.* 1980, **102**, 5274.
10. Ikeda, Y.; Ukai, J.; Ikeda, N.; Yamamoto, H. *Tetrahedron* 1987, **43**, 723.
11. Wang, Y.; West, F. G. *Synthesis* 2002, 99.
